# Supplementary material
Source: Research Square preprint supplement (doi:10.21203/rs.3.rs-9253804/v1)
Supplement: Supplementary file 1 [file 9b93bbbb317dfcc76ba58d80.docx]

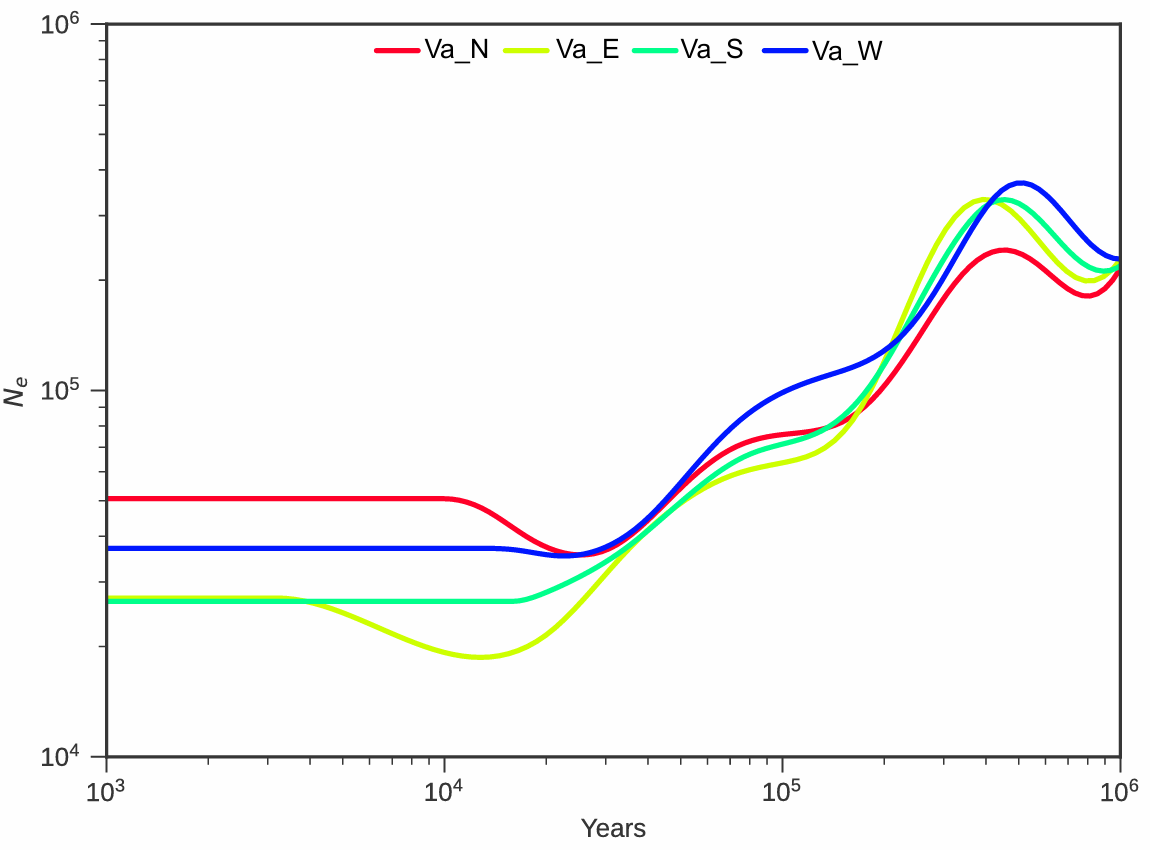


Fig. S1 Simulation of four wild populations of vitis amurensis based on SMC++.


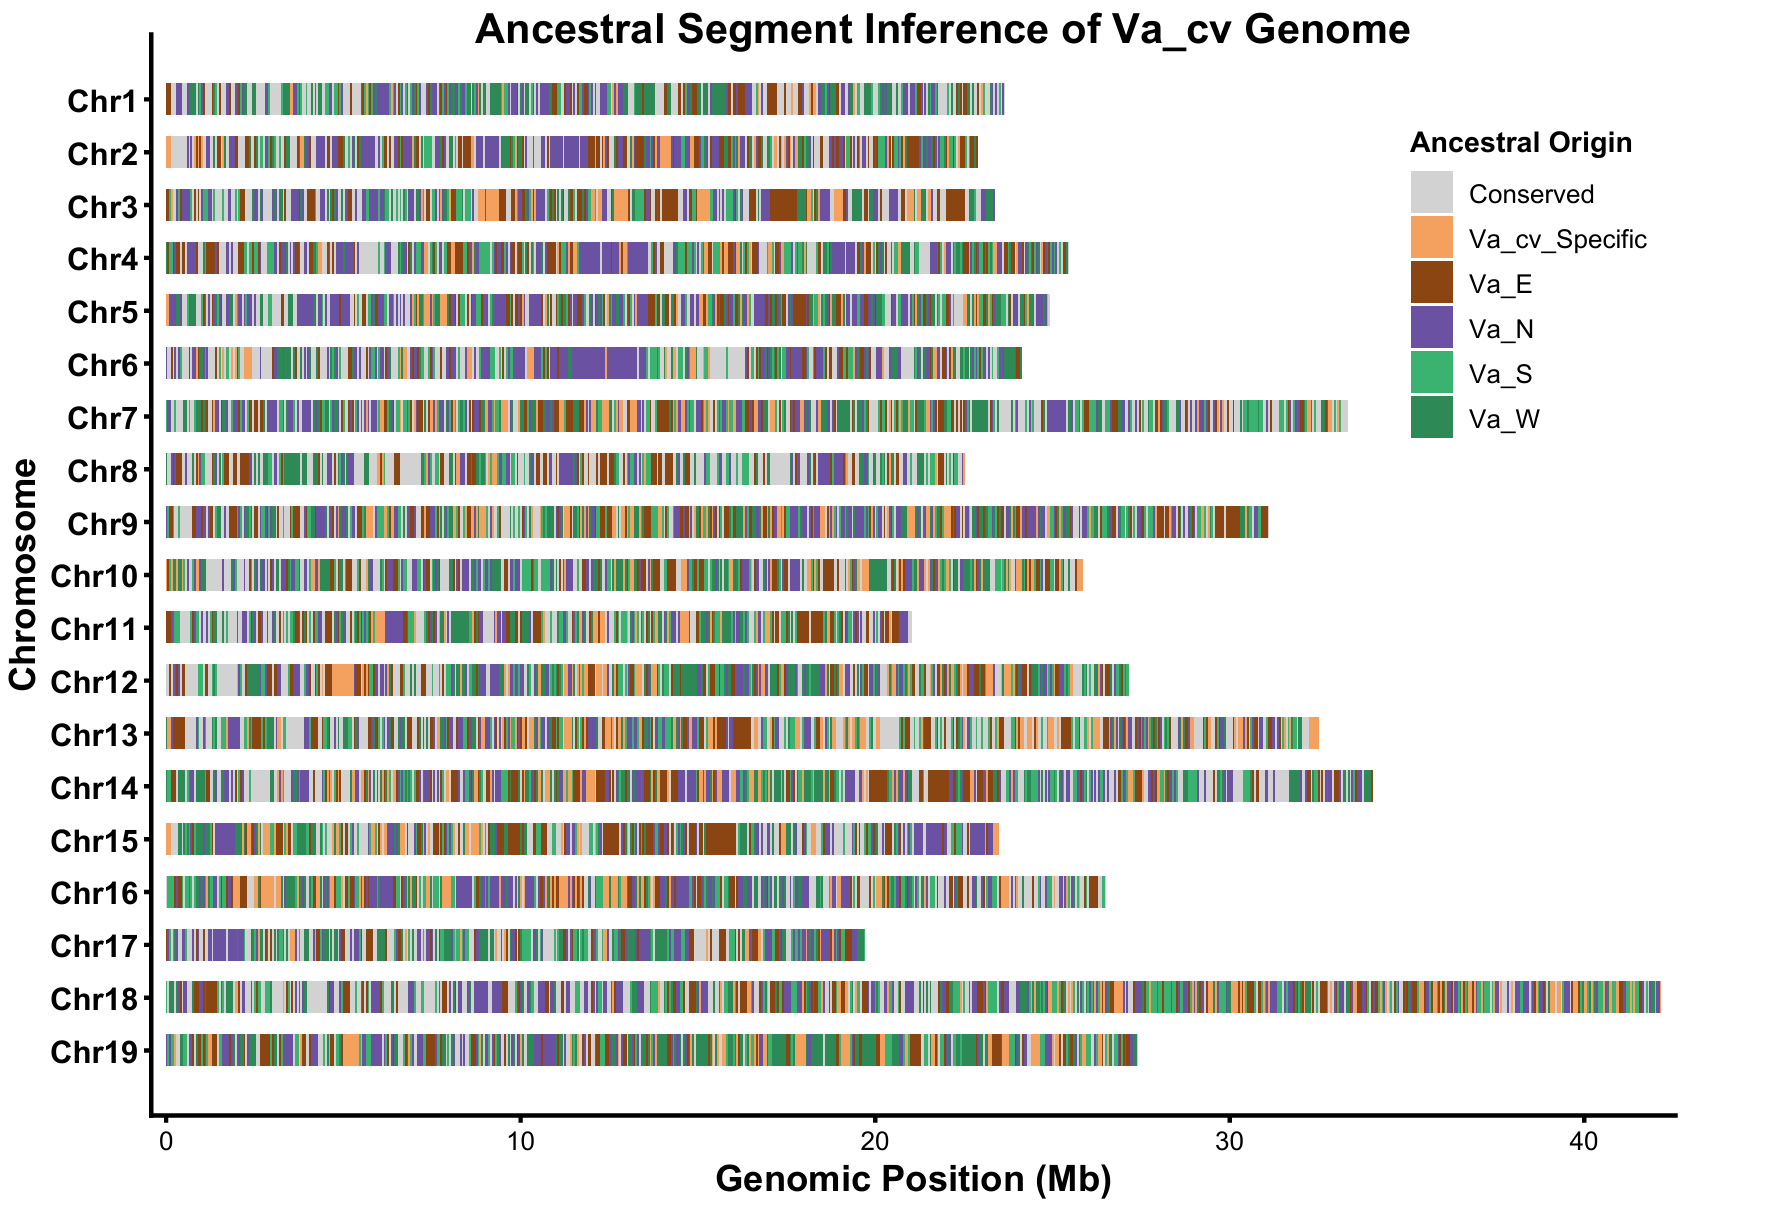


Fig. S2 Ancestral segment inference of Va_cv genome.


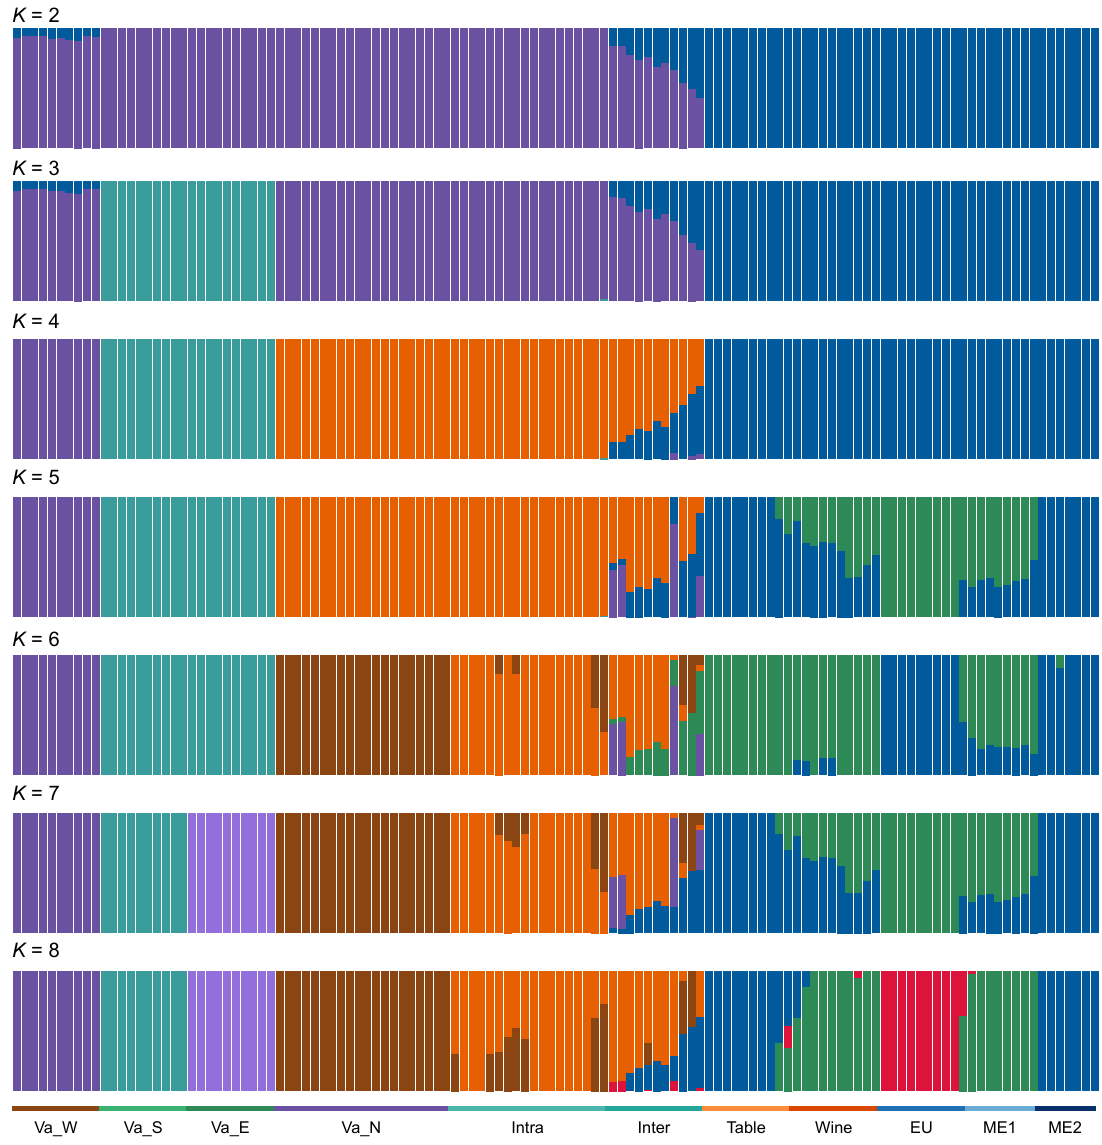


Fig. S3 Admixture analysis results for 130 resequencing samples (K ranging from 2 to 8).


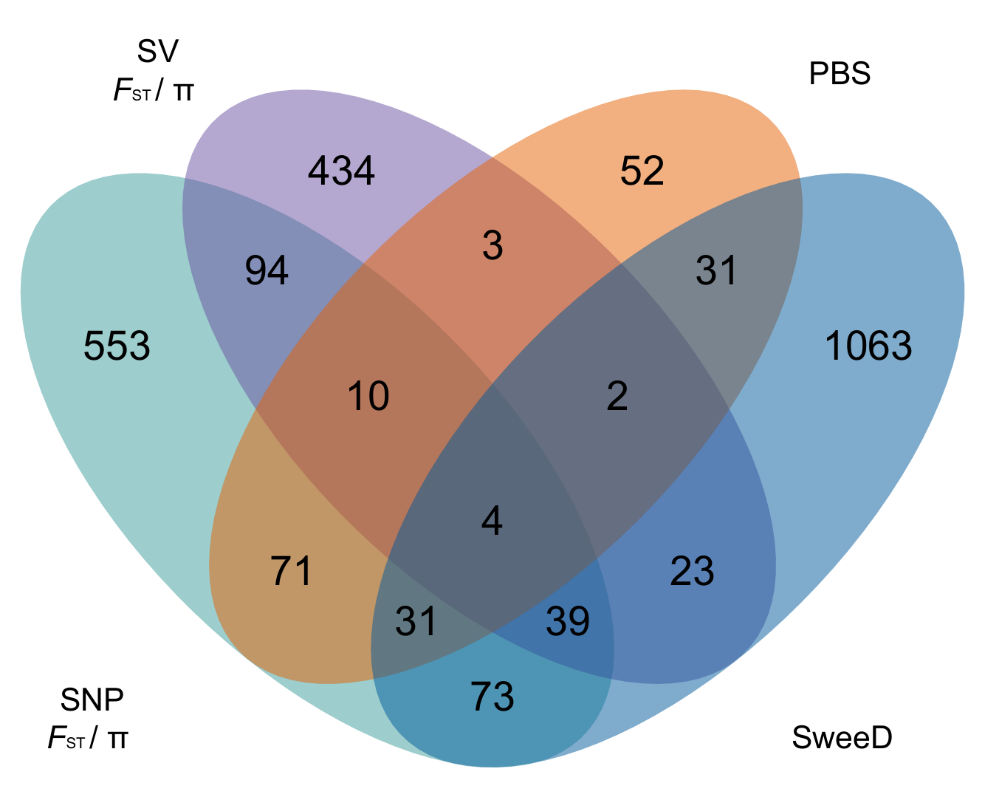


Fig. S4 Number of selected genes found by different methods in Vv_CV population.
