# Supplementary material
Source: Research Square preprint supplement (doi:10.21203/rs.3.rs-9253804/v1)
Supplement: Supplementary file 1 [file 614b4d171557e9dfda901464.xlsx]

## Sheet: S1
Table S1. Repetitive elements annotation and genome sizes of Amur grapes
Genome Name	Repetitive elements (%)	Genome size (bp)
Va_W	63.48	503545769
Va_S	63.41	502487151
Va_E	64.08	507162761
Va_N	63.36	533922671
Va_cv	59.21	511389110

## Sheet: S2
Table S2. Ancestral segment inference of Va_cv genome
Chr	Start	End	va_W	va_N	va_E	va_S	Max_Cov	Assigned_Ancestry
Chr1	0	50000	0.9309	0.9037	0.9437	0.9294	1	va_E
Chr1	50000	100000	0.9128	0.8928	0.921	0.9153	1	va_E
Chr1	100000	150000	0.9128	0.8928	0.921	0.9153	1	va_E
Chr1	150000	200000	0.9287	0.9537	0.9767	0.9737	0.9976	Conserved
Chr1	200000	250000	0.9802	0.9102	0.9835	0.9816	0.9951	Conserved
Chr1	250000	300000	0.8185	0.9771	0.9756	0.9684	0.9988	Conserved
Chr1	300000	350000	0.7761	0.9827	0.9675	0.9631	0.9985	va_N
Chr1	350000	400000	0.9675	0.9961	0.9386	0.8839	1	va_N
Chr1	400000	450000	0.9801	0.9961	0.9386	0.8839	1	va_N
Chr1	450000	500000	0.9356	0.9546	0.951	0.9403	0.9913	Conserved
Chr1	500000	550000	0.9837	0.9811	0.9515	0.9534	0.9773	Conserved
Chr1	550000	600000	0.9799	0.9805	0.9831	0.9722	0.9896	Conserved
Chr1	600000	650000	0.9473	0.9983	0.9396	0.9576	1	va_N
Chr1	650000	700000	0.9874	0.9711	0.84	0.8874	0.9861	va_W
Chr1	700000	750000	0.9922	0.9737	0.9846	0.9832	1	va_W
Chr1	750000	800000	0.9922	0.969	0.9752	0.9862	1	va_W
Chr1	800000	850000	0.9955	0.8393	0.9402	0.7295	0.9988	va_W
Chr1	850000	900000	0.9849	0.9737	0.9648	0.9843	0.4089	Conserved
Chr1	900000	950000	0.9845	0.8479	0.9714	0.976	0.8726	va_W
Chr1	950000	1000000	0.8233	0.7825	0.5391	0.9227	0.9826	va_S
Chr1	1000000	1050000	0.9518	0.9843	0.7455	0.9503	0.9968	va_N
Chr1	1050000	1100000	0.9544	0.8572	0.9655	0.7465	0.9902	va_E
Chr1	1100000	1150000	0.9675	0.9848	0.981	0.8017	0.9722	Conserved
Chr1	1150000	1200000	0.9824	0.984	0.9752	0.9793	0.9473	Conserved
Chr1	1200000	1250000	0.9939	0.9912	0.9901	0.977	1	Conserved
Chr1	1250000	1300000	0.9435	0.9763	0.9795	0.9592	0.9758	Conserved
Chr1	1300000	1350000	0.907	0.9388	0.9845	0.9168	0.9978	va_E
Chr1	1350000	1400000	0.935	0.8795	0.8547	0.9178	0.9972	va_W
Chr1	1400000	1450000	0.9578	0.9313	0.92	0.9693	0.9979	va_S
Chr1	1450000	1500000	0.9262	0.9828	0.9845	0.9198	1	Conserved
Chr1	1500000	1550000	0.9337	0.9796	0.9848	0.9493	1	va_E
Chr1	1550000	1600000	0.9784	0.9372	0.8862	0.9808	0.9884	Conserved
Chr1	1600000	1650000	0.9679	0.8711	0.968	0.961	0.961	Conserved
Chr1	1650000	1700000	0.9654	0.9639	0.9352	0.9538	0.9914	Conserved
Chr1	1700000	1750000	0.9835	0.9911	0.9658	0.9738	0.9921	va_N
Chr1	1750000	1800000	0.9795	0.9891	0.9693	0.9662	0.9984	va_N
Chr1	1800000	1850000	0.871	0.9322	0.9696	0.8435	0.9851	va_E
Chr1	1850000	1900000	0.9509	0.9623	0.9886	0.9864	0.9677	Conserved
Chr1	1900000	1950000	0.8774	0.898	0.5987	0.8996	1	Conserved
Chr1	1950000	2000000	0.8522	0.9806	0.9421	0.9511	0.9834	va_N
Chr1	2000000	2050000	0.9792	0.9845	0.9775	0.9226	0.9921	va_N
Chr1	2050000	2100000	0.956	0.9413	0.9804	0.9225	0.9886	va_E
Chr1	2100000	2150000	0.8679	0.8774	0.8743	0.9318	0.999	va_S
Chr1	2150000	2200000	0.8532	0.9699	0.9379	0.8725	1	va_N
Chr1	2200000	2250000	0.9822	0.9286	0.9187	0.8919	0.8975	va_W
Chr1	2250000	2300000	0.9822	0.9323	0.6671	0.9415	0.7942	va_W
Chr1	2300000	2350000	0.9729	0.9728	0.3758	0.7564	0.8713	Conserved
Chr1	2350000	2400000	0.9829	0.9786	0.9634	0.6033	0.5248	Conserved
Chr1	2400000	2450000	0.9906	0.9871	0.9949	0.9935	0.9988	Conserved
Chr1	2450000	2500000	0.9879	0.9594	0.9504	0.9608	1	va_W
Chr1	2500000	2550000	0.9878	0.9571	0.9613	0.9546	0.9933	va_W
Chr1	2550000	2600000	0.9864	0.9179	0.9851	0.9788	1	Conserved
Chr1	2600000	2650000	0.9873	0.9134	0.98	0.9866	0.9884	Conserved
Chr1	2650000	2700000	0.9854	0.9853	0.9815	0.9756	0.962	Conserved
Chr1	2700000	2750000	0.8385	0.9749	0.9768	0.9614	0.987	Conserved
Chr1	2750000	2800000	0.8391	0.8779	0.8843	0.8845	1	Conserved
Chr1	2800000	2850000	0.8574	0.8948	0.8843	0.8845	1	va_N
Chr1	2850000	2900000	0.807	0.9834	0.9609	0.9486	0.9683	va_N
Chr1	2900000	2950000	0.9765	0.9153	0.9728	0.9835	0.9985	va_S
Chr1	2950000	3000000	0.9892	0.9476	0.9799	0.9846	1	Conserved
Chr1	3000000	3050000	0.9868	0.9807	0.9735	0.9826	0.9552	Conserved
Chr1	3050000	3100000	0.9548	0.9798	0.9831	0.9764	0.9807	Conserved
Chr1	3100000	3150000	0.8038	0.9654	0.9832	0.9806	0.9988	Conserved
Chr1	3150000	3200000	0.9805	0.9791	0.9847	0.9849	0.9892	Conserved
Chr1	3200000	3250000	0.9882	0.991	0.989	0.9902	0.8793	Conserved
Chr1	3250000	3300000	0.9725	0.8556	0.9706	0.9843	0.9993	va_S
Chr1	3300000	3350000	0.972	0.7677	0.9559	0.8492	0.9975	va_W
Chr1	3350000	3400000	0.9125	0.6674	0.7003	0.672	1	va_W
Chr1	3400000	3450000	0.9208	0.6674	0.7003	0.672	1	va_W
Chr1	3450000	3500000	0.9657	0.6674	0.7003	0.672	1	va_W
Chr1	3500000	3550000	0.6841	0.6674	0.7746	0.672	1	Specific
Chr1	3550000	3600000	0.6841	0.6724	0.3713	0.7598	1	Specific
Chr1	3600000	3650000	0.8663	0.93	0.8563	0.9002	0.986	va_N
Chr1	3650000	3700000	0.962	0.9922	0.9702	0.9611	0.9811	va_N
Chr1	3700000	3750000	0.9404	0.9414	0.9764	0.9931	0.9601	va_S
Chr1	3750000	3800000	0.9912	0.9965	0.9792	0.9758	1	va_N
Chr1	3800000	3850000	0.8136	0.8314	0.9568	0.9673	0.981	va_S
Chr1	3850000	3900000	0.9814	0.9839	0.9798	0.9361	0.9893	Conserved
Chr1	3900000	3950000	0.9698	0.9712	0.9825	0.9866	0.9992	Conserved
Chr1	3950000	4000000	0.9636	0.9656	0.9695	0.9911	1	va_S
Chr1	4000000	4050000	0.9649	0.9656	0.9534	0.9691	1	Conserved
Chr1	4050000	4100000	0.9883	0.9429	0.9886	0.7153	0.9962	Conserved
Chr1	4100000	4150000	0.9918	0.9593	0.9793	0.8627	0.994	va_W
Chr1	4150000	4200000	0.9938	0.9889	0.9871	0.9687	0.9984	Conserved
Chr1	4200000	4250000	0.993	0.9878	0.988	0.979	0.9966	va_W
Chr1	4250000	4300000	0.987	0.9853	0.9853	0.7419	0.9989	Conserved
Chr1	4300000	4350000	0.9845	0.9114	0.9114	0.8716	0.9907	va_W
Chr1	4350000	4400000	0.9871	0.9792	0.9792	0.9757	0.9932	va_W
Chr1	4400000	4450000	0.9707	0.987	0.987	0.9191	0.9765	Conserved
Chr1	4450000	4500000	0.9277	0.971	0.971	0.9529	0.9811	Conserved
Chr1	4500000	4550000	0.8615	0.8615	0.8614	0.9346	0.8148	va_S
Chr1	4550000	4600000	0.8703	0.8703	0.8703	0.98	0.9834	va_S
Chr1	4600000	4650000	0.9556	0.9868	0.9603	0.9605	0.9845	va_N
Chr1	4650000	4700000	0.9725	0.9912	0.9783	0.9495	0.9924	va_N
Chr1	4700000	4750000	0.9934	0.9844	0.9896	0.9203	0.9993	Conserved
Chr1	4750000	4800000	0.9069	0.8951	0.9109	0.9652	0.9811	va_S
Chr1	4800000	4850000	0.8969	0.8876	0.9077	0.9616	0.9865	va_S
Chr1	4850000	4900000	0.9126	0.913	0.9856	0.9151	0.9837	va_E
Chr1	4900000	4950000	0.9815	0.9497	0.9696	0.9893	0.9068	va_S
Chr1	4950000	5000000	0.8781	0.9801	0.8892	0.8898	1	va_N
Chr1	5000000	5050000	0.7455	0.8656	0.8656	0.7915	0.983	Conserved
Chr1	5050000	5100000	0.9262	0.9348	0.9472	0.9464	0.915	Conserved
Chr1	5100000	5150000	0.9565	0.9342	0.955	0.9554	1	Conserved
Chr1	5150000	5200000	0.9944	0.9953	0.9556	0.956	0.9984	Conserved
Chr1	5200000	5250000	0.9682	0.9583	0.9802	0.8513	0.9975	va_E
Chr1	5250000	5300000	0.9624	0.9594	0.9677	0.9654	0.8986	Conserved
Chr1	5300000	5350000	0.948	0.9782	0.8707	0.9821	0.9954	Conserved
Chr1	5350000	5400000	0.9208	0.9201	0.8304	0.9106	1	Conserved
Chr1	5400000	5450000	0.9145	0.9145	0.8567	0.8957	0.997	Conserved
Chr1	5450000	5500000	0.9648	0.979	0.9781	0.9325	0.9919	Conserved
Chr1	5500000	5550000	0.9112	0.9579	0.9057	0.8784	0.9484	va_N
Chr1	5550000	5600000	0.9263	0.9527	0.9592	0.8794	1	va_E
Chr1	5600000	5650000	0.9779	0.7632	0.9786	0.9851	0.9768	va_S
Chr1	5650000	5700000	0.8289	0.8457	0.8473	0.8201	0.9407	Specific
Chr1	5700000	5750000	0.9236	0.9734	0.9759	0.985	0.9906	va_S
Chr1	5750000	5800000	0.9658	0.9639	0.9904	0.9663	1	va_E
Chr1	5800000	5850000	0.975	0.954	0.9531	0.9815	0.9981	va_S
Chr1	5850000	5900000	0.9695	0.9802	0.9454	0.9195	0.9914	va_N
Chr1	5900000	5950000	0.9681	0.9619	0.9171	0.9036	1	va_W
Chr1	5950000	6000000	0.9478	0.9825	0.9481	0.8379	0.9846	va_N
Chr1	6000000	6050000	0.9651	0.9909	0.8878	0.9855	0.9974	va_N
Chr1	6050000	6100000	0.928	0.9936	0.9562	0.9493	0.9983	va_N
Chr1	6100000	6150000	0.7942	0.9937	0.8401	0.8927	0.9598	va_N
Chr1	6150000	6200000	0.9215	0.9813	0.9331	0.9594	0.9709	va_N
Chr1	6200000	6250000	0.8505	0.9921	0.9463	0.9607	1	va_N
Chr1	6250000	6300000	0.9105	0.9833	0.9545	0.9677	0.9395	va_N
Chr1	6300000	6350000	0.9133	0.9585	0.8729	0.973	0.9757	va_S
Chr1	6350000	6400000	0.7863	0.8107	0.7857	0.8211	0.93	Specific
Chr1	6400000	6450000	0.8294	0.8031	0.7895	0.8746	0.997	va_S
Chr1	6450000	6500000	0.9669	0.9875	0.8295	0.9788	1	va_N
Chr1	6500000	6550000	0.9738	0.9696	0.8766	0.9691	0.9975	Conserved
Chr1	6550000	6600000	0.9204	0.9334	0.9749	0.96	0.9763	va_E
Chr1	6600000	6650000	0.8351	0.7863	0.8619	0.8712	0.9994	va_S
Chr1	6650000	6700000	0.95	0.9886	0.8463	0.8661	0.9956	va_N
Chr1	6700000	6750000	0.967	0.9609	0.967	0.9429	0.985	Conserved
Chr1	6750000	6800000	0.8754	0.9684	0.9557	0.9764	0.9563	va_S
Chr1	6800000	6850000	0.9299	0.9841	0.9777	0.8861	0.9972	va_N
Chr1	6850000	6900000	0.9747	0.9843	0.9836	0.9837	0.9912	Conserved
Chr1	6900000	6950000	0.8264	0.7812	0.7223	0.9031	0.9805	va_S
Chr1	6950000	7000000	0.9386	0.9765	0.8305	0.8516	0.9897	va_N
Chr1	7000000	7050000	0.9344	0.874	0.8976	0.8323	0.9737	va_W
Chr1	7050000	7100000	0.8927	0.939	0.9703	0.8952	0.944	va_E
Chr1	7100000	7150000	0.8759	0.9637	0.8454	0.9739	0.9512	va_S
Chr1	7150000	7200000	0.8468	0.9828	0.9391	0.9746	0.9984	va_N
Chr1	7200000	7250000	0.9716	0.9894	0.9869	0.9873	1	Conserved
Chr1	7250000	7300000	0.9773	0.9914	0.9876	0.99	0.9948	Conserved
Chr1	7300000	7350000	0.9725	0.972	0.9687	0.8588	0.9962	Conserved
Chr1	7350000	7400000	0.8944	0.9649	0.9433	0.9322	1	va_N
Chr1	7400000	7450000	0.9448	0.9652	0.976	0.928	0.9981	va_E
Chr1	7450000	7500000	0.9533	0.9483	0.9015	0.8886	1	va_W
Chr1	7500000	7550000	0.9034	0.951	0.9438	0.9206	0.9947	va_N
Chr1	7550000	7600000	0.9043	0.98	0.94	0.9617	1	va_N
Chr1	7600000	7650000	0.7379	0.9418	0.7603	0.777	0.9798	va_N
Chr1	7650000	7700000	0.7844	0.9607	0.9605	0.965	1	Conserved
Chr1	7700000	7750000	0.9013	0.9607	0.9497	0.8501	1	va_N
Chr1	7750000	7800000	0.9697	0.9607	0.9766	0.8716	1	va_E
Chr1	7800000	7850000	0.9695	0.9723	0.9723	0.981	0.9671	va_S
Chr1	7850000	7900000	0.9483	0.987	0.9671	0.9625	0.9409	va_N
Chr1	7900000	7950000	0.9491	0.8961	0.9544	0.8618	1	va_E
Chr1	7950000	8000000	0.9663	0.7453	0.4464	0.9812	0.9991	va_S
Chr1	8000000	8050000	0.8419	0.9113	0.6283	0.8652	1	va_N
Chr1	8050000	8100000	0.9437	0.9113	0.8402	0.7901	1	va_W
Chr1	8100000	8150000	0.9375	0.9113	0.8402	0.7901	1	va_W
Chr1	8150000	8200000	0.6862	0.89	0.8402	0.8472	1	va_N
Chr1	8200000	8250000	0.8828	0.9046	0.892	0.7969	0.9673	va_N
Chr1	8250000	8300000	0.8519	0.8427	0.8737	0.9023	0.9929	va_S
Chr1	8300000	8350000	0.9397	0.8492	0.9295	0.9187	0.9248	va_W
Chr1	8350000	8400000	0.662	0.9191	0.8228	0.8021	1	va_N
Chr1	8400000	8450000	0.7859	0.9656	0.8562	0.6772	0.996	va_N
Chr1	8450000	8500000	0.7187	0.9676	0.9544	0.9755	0.9901	va_S
Chr1	8500000	8550000	0.9637	0.9069	0.8307	0.7421	1	va_W
Chr1	8550000	8600000	0.9969	0.9829	0.8444	0.8757	0.987	va_W
Chr1	8600000	8650000	0.9439	0.9706	0.9713	0.909	0.956	Conserved
Chr1	8650000	8700000	0.9932	0.7481	0.7642	0.9838	1	va_W
Chr1	8700000	8750000	0.9224	0.6763	0.6482	0.9406	0.9901	va_S
Chr1	8750000	8800000	0.9536	0.9736	0.9672	0.7596	1	va_N
Chr1	8800000	8850000	0.736	0.7356	0.8112	0.7701	0.9721	Specific
Chr1	8850000	8900000	0.8766	0.8031	0.8112	0.8441	0.9887	va_W
Chr1	8900000	8950000	0.9457	0.9475	0.5871	0.8359	1	Conserved
Chr1	8950000	9000000	0.9904	0	0.7357	0.7895	0.9961	va_W
Chr1	9000000	9050000	0.991	0.9629	0.8631	0.8813	0.9296	va_W
Chr1	9050000	9100000	0.9927	0.9954	0.9902	0.9943	0.9689	Conserved
Chr1	9100000	9150000	0.9987	0.9957	0.9944	0.9962	1	Conserved
Chr1	9150000	9200000	0.9987	0.9589	0.979	0.992	1	va_W
Chr1	9200000	9250000	0.9987	0.8636	0.9671	0.9746	1	va_W
Chr1	9250000	9300000	0.9987	0.9872	0.962	0.9401	1	va_W
Chr1	9300000	9350000	0.9987	0.8747	0.962	0.9723	1	va_W
Chr1	9350000	9400000	0.9987	0.8918	0.9571	0.9711	1	va_W
Chr1	9400000	9450000	0.9987	0.8173	0.9472	0.9052	0.4172	va_W
Chr1	9450000	9500000	0	0	0.6015	0.9828	0.4878	va_S
Chr1	9500000	9550000	0.9553	0.5449	0.9553	0.9939	0.0775	Specific
Chr1	9550000	9600000	0.8973	0.8716	0.7595	0.9912	0.9983	va_S
Chr1	9600000	9650000	0.8384	0.9096	0.7901	0.941	0.7583	va_S
Chr1	9650000	9700000	0.8095	0.8835	0.6864	0.7957	0.928	va_N
Chr1	9700000	9750000	0.969	0.988	0.4214	0.9884	0.9981	Conserved
Chr1	9750000	9800000	0.8586	0.9574	0.9472	0.9054	0.9988	va_N
Chr1	9800000	9850000	0.8307	0.9677	0.9439	0.8865	0.9985	va_N
Chr1	9850000	9900000	0.9612	0.9834	0.8689	0.9688	0.9979	va_N
Chr1	9900000	9950000	0.9626	0.9471	0.9766	0.9332	1	va_E
Chr1	9950000	10000000	0.9626	0.8664	0.9578	0.8834	1	Conserved
Chr1	10000000	10050000	0.9645	0.9074	0.7896	0.917	1	va_W
Chr1	10050000	10100000	0.8654	0.958	0.891	0.9457	0.9663	va_N
Chr1	10100000	10150000	0.7496	0.963	0.9356	0.9661	1	Conserved
Chr1	10150000	10200000	0.9625	0.826	0.9264	0.9409	0.9759	va_W
Chr1	10200000	10250000	0.9792	0.8654	0.8627	0.9499	1	va_W
Chr1	10250000	10300000	0.8773	0.9227	0.8216	0.9271	0.7631	Conserved
Chr1	10300000	10350000	0.8355	0.8629	0.8732	0.9256	0.9698	va_S
Chr1	10350000	10400000	0.9201	0.993	0.9187	0.9221	0.9613	va_N
Chr1	10400000	10450000	0.9756	0.9833	0.9696	0.9786	0.9694	Conserved
Chr1	10450000	10500000	0.9575	0.9731	0.9486	0.8144	0.9765	va_N
Chr1	10500000	10550000	0.9717	0.9889	0.9727	0.9859	1	Conserved
Chr1	10550000	10600000	0.8204	0.9905	0.8122	0.9556	0.9969	va_N
Chr1	10600000	10650000	0.75	0.9939	0.6128	0.8389	0.9943	va_N
Chr1	10650000	10700000	0.9585	0.9923	0.7198	0.6868	0.9851	va_N
Chr1	10700000	10750000	0.9725	0.9908	0.982	0.8278	1	va_N
Chr1	10750000	10800000	0.8573	0.9908	0.5393	0.475	1	va_N
Chr1	10800000	10850000	0.9911	0.8437	0.7649	0.758	1	va_W
Chr1	10850000	10900000	0.9913	0.8437	0.9756	0.9615	1	va_W
Chr1	10900000	10950000	0.9439	0.8904	0.9789	0.9295	0.9321	va_E
Chr1	10950000	11000000	0.9302	0.9804	0.9879	0.9537	1	va_E
Chr1	11000000	11050000	0.9302	0.9805	0.9879	0.9623	1	va_E
Chr1	11050000	11100000	0.8268	0.9271	0.8516	0.987	1	va_S
Chr1	11100000	11150000	0.8823	0.9196	0.8826	0.9508	0.9875	va_S
Chr1	11150000	11200000	0.9172	0.9155	0.9912	0.99	1	Conserved
Chr1	11200000	11250000	0.8991	0.9155	0.9933	0.9928	1	Conserved
Chr1	11250000	11300000	0.9	0.9155	0.9753	0.9535	1	va_E
Chr1	11300000	11350000	0.8991	0.9173	0.8292	0.8385	1	va_N
Chr1	11350000	11400000	0.9019	0.9305	0.8785	0.8652	0.9988	va_N
Chr1	11400000	11450000	0.9318	0.9727	0.9908	0.9189	0.9662	va_E
Chr1	11450000	11500000	0.9837	0.9837	0.9883	0.9793	0.9721	Conserved
Chr1	11500000	11550000	0.774	0.8625	0.8525	0.8063	0.9974	va_N
Chr1	11550000	11600000	0.7311	0.8582	0.8563	0.8504	0.9863	Conserved
Chr1	11600000	11650000	0.8388	0.8381	0.9655	0.922	0.9519	va_E
Chr1	11650000	11700000	0.8822	0.9006	0.7942	0.94	0.9988	va_S
Chr1	11700000	11750000	0.6264	0.5861	0.5561	0.8831	0.985	va_S
Chr1	11750000	11800000	0.9404	0.948	0.928	0.8814	1	va_N
Chr1	11800000	11850000	0.9268	0.9388	0.9692	0.8814	1	va_E
Chr1	11850000	11900000	0.9368	0.9493	0.9604	0.7793	0.9996	va_E
Chr1	11900000	11950000	0.8953	0.9503	0.8825	0.9137	1	va_N
Chr1	11950000	12000000	0.9043	0.9261	0.8685	0.9401	1	va_S
Chr1	12000000	12050000	0.7899	0.9569	0.9224	0.8471	0.992	va_N
Chr1	12050000	12100000	0.9597	0.9852	0.9859	0.9593	0.9786	Conserved
Chr1	12100000	12150000	0.9597	0.9889	0.9812	0.9765	0.974	va_N
Chr1	12150000	12200000	0.944	0.9924	0.9918	0.9144	1	Conserved
Chr1	12200000	12250000	0.944	0.9624	0.9646	0.8123	1	Conserved
Chr1	12250000	12300000	0.944	0.977	0.9324	0.8785	1	va_N
Chr1	12300000	12350000	0.944	0.9857	0.9265	0.863	1	va_N
Chr1	12350000	12400000	0.944	0.9881	0.8425	0.7366	1	va_N
Chr1	12400000	12450000	0.941	0.9878	0.732	0.7452	0.999	va_N
Chr1	12450000	12500000	0.8977	0.9416	0.9122	0.9924	1	va_S
Chr1	12500000	12550000	0.8956	0.9416	0.9491	0.9808	0.6635	va_S
Chr1	12550000	12600000	0.9181	0.9069	0.8126	0.9184	0.55	Conserved
Chr1	12600000	12650000	0.826	0.7715	0.8093	0.8247	1	Specific
Chr1	12650000	12700000	0.826	0.8659	0.8217	0.8247	1	va_N
Chr1	12700000	12750000	0.8032	0.8485	0.8436	0.817	1	Specific
Chr1	12750000	12800000	0.9459	0.9799	0.8997	0.949	0.9977	va_N
Chr1	12800000	12850000	0.9542	0.9932	0.8492	0.8795	1	va_N
Chr1	12850000	12900000	0.9695	0.992	0.9208	0.9132	0.9696	va_N
Chr1	12900000	12950000	0.9867	0.938	0.9375	0.9304	0.9692	va_W
Chr1	12950000	13000000	0.9895	0.7742	0.7902	0.9759	0.9969	va_W
Chr1	13000000	13050000	0.982	0.8948	0.8298	0.8839	0.9705	va_W
Chr1	13050000	13100000	0.9663	0.9636	0.9602	0.863	0.9117	Conserved
Chr1	13100000	13150000	0.9776	0.9759	0.8042	0.9503	0.9826	Conserved
Chr1	13150000	13200000	0.9743	0.9708	0.808	0.9598	1	Conserved
Chr1	13200000	13250000	0.9594	0.9164	0.9179	0.9663	0.8649	va_S
Chr1	13250000	13300000	0.9959	0.984	0.923	0.9701	0.9992	va_W
Chr1	13300000	13350000	0.9903	0.7057	0.798	0.9499	1	va_W
Chr1	13350000	13400000	0.9504	0.6457	0.7721	0.9272	0.8827	va_W
Chr1	13400000	13450000	0.9248	0.8513	0.8164	0.7249	1	va_W
Chr1	13450000	13500000	0.8535	0.9136	0.9279	0.7249	0.5356	va_E
Chr1	13500000	13550000	0.9922	0.8415	0.8871	0.9867	0.9035	va_W
Chr1	13550000	13600000	0.9936	0.8137	0.8337	0.6867	1	va_W
Chr1	13600000	13650000	0.9951	0.909	0.9149	0.6478	0.9938	va_W
Chr1	13650000	13700000	0.9925	0.9516	0.9147	0.9836	0.994	va_W
Chr1	13700000	13750000	0.9872	0.9406	0.9161	0.9577	0.9529	va_W
Chr1	13750000	13800000	0.9838	0.9686	0.8982	0.9195	1	va_W
Chr1	13800000	13850000	0.9866	0.9821	0.8966	0.9055	0.9911	Conserved
Chr1	13850000	13900000	0.9948	0.9901	0.9819	0.989	0.9986	Conserved
Chr1	13900000	13950000	0.9965	0.7276	0.9949	0.9463	1	Conserved
Chr1	13950000	14000000	0.9935	0.8153	0.9891	0.9017	1	Conserved
Chr1	14000000	14050000	0.9938	0.5683	0.9938	0.9354	1	Conserved
Chr1	14050000	14100000	0.9686	0.8696	0.9776	0.7273	1	va_E
Chr1	14100000	14150000	0.9287	0.8497	0.9351	0.6781	1	va_E
Chr1	14150000	14200000	0.9986	0.837	0.9351	0.7393	1	va_W
Chr1	14200000	14250000	0.9984	0.9128	0.9642	0.7113	0.9973	va_W
Chr1	14250000	14300000	0.9707	0.946	0.9718	0.8009	1	Conserved
Chr1	14300000	14350000	0.8958	0.8167	0.8931	0.7463	1	Conserved
Chr1	14350000	14400000	0.8955	0.8242	0.8931	0.7494	1	Conserved
Chr1	14400000	14450000	0.8972	0.8208	0.8947	0.7696	1	Conserved
Chr1	14450000	14500000	0.9686	0.9118	0.9748	0.9577	0.9158	va_E
Chr1	14500000	14550000	0.9899	0.9897	0.9971	0.7194	1	va_E
Chr1	14550000	14600000	0.9734	0.9644	0.972	0.965	1	Conserved
Chr1	14600000	14650000	0.9297	0.9075	0.9354	0.9185	1	va_E
Chr1	14650000	14700000	0.9302	0.8655	0.9358	0.9925	0.904	va_S
Chr1	14700000	14750000	0	0.9878	0.9559	0.7685	0.5786	va_N
Chr1	14750000	14800000	0	0.9458	0.9367	0.7685	1	va_N
Chr1	14800000	14850000	0.9699	0.6792	0.9561	0.7533	0.9992	va_W
Chr1	14850000	14900000	0	0.8361	0.9085	0.8597	1	va_E
Chr1	14900000	14950000	0	0.8284	0.8871	0.8523	1	va_E
Chr1	14950000	15000000	0	0.8214	0.8897	0.8552	1	va_E
Chr1	15000000	15050000	0.9607	0.8214	0.8837	0.8512	1	va_W
Chr1	15050000	15100000	0.9644	0.8214	0.8837	0.8557	0.5378	va_W
Chr1	15100000	15150000	0.9947	0.8822	0.8511	0.9945	0.9516	Conserved
Chr1	15150000	15200000	0.9943	0.7516	0.7039	0.9343	1	va_W
Chr1	15200000	15250000	0.9957	0.6764	0.6473	0.9519	0.9454	va_W
Chr1	15250000	15300000	0.9973	0.843	0.843	0.9658	0.9984	va_W
Chr1	15300000	15350000	0.8277	0.9282	0.9281	0.9314	0.9555	Conserved
Chr1	15350000	15400000	0.882	0.9761	0.9636	0.866	1	va_N
Chr1	15400000	15450000	0.9727	0.789	0.966	0.866	1	va_W
Chr1	15450000	15500000	0.9763	0.7491	0.8567	0.924	0.996	va_W
Chr1	15500000	15550000	0.9934	0.7815	0.8384	0.8085	1	va_W
Chr1	15550000	15600000	0.9924	0.7608	0.8591	0.8484	0.99	va_W
Chr1	15600000	15650000	0.9901	0.7135	0.919	0.9437	1	va_W
Chr1	15650000	15700000	0.9901	0.7135	0.5467	0.541	1	va_W
Chr1	15700000	15750000	0.9901	0.7135	0.4974	0.6573	1	va_W
Chr1	15750000	15800000	0.9544	0.8055	0.8633	0.8271	0.9948	va_W
Chr1	15800000	15850000	0.6512	0.8712	0.8578	0.5971	1	va_N
Chr1	15850000	15900000	0.7835	0.8712	0.96	0.5758	1	va_E
Chr1	15900000	15950000	0.8648	0.9179	0.9749	0.6436	0.9815	va_E
Chr1	15950000	16000000	0.9645	0.9649	0.9899	0.9883	0.9935	Conserved
Chr1	16000000	16050000	0.9316	0.9523	0.9912	0.8428	0.9996	va_E
Chr1	16050000	16100000	0.7477	0.6723	0.9577	0.5569	1	va_E
Chr1	16100000	16150000	0.9662	0.9778	0.9703	0.5555	0.9131	va_N
Chr1	16150000	16200000	0.9352	0.9471	0.9679	0.6916	1	va_E
Chr1	16200000	16250000	0.8456	0.8415	0.9802	0.7874	1	va_E
Chr1	16250000	16300000	0	0.8558	0.9802	0	1	va_E
Chr1	16300000	16350000	0.9475	0.9181	0.977	0.9522	0.8999	va_E
Chr1	16350000	16400000	0.829	0.9139	0.8862	0.6926	1	va_N
Chr1	16400000	16450000	0.7457	0.9966	0.8862	0.6926	1	va_N
Chr1	16450000	16500000	0.8986	0.993	0.8917	0.9264	0.7178	va_N
Chr1	16500000	16550000	0.8861	0.9628	0.8773	0.902	0.9943	va_N
Chr1	16550000	16600000	0.9641	0.9628	0.8098	0.843	1	Conserved
Chr1	16600000	16650000	0.9639	0.963	0.8148	0.8686	0.9919	Conserved
Chr1	16650000	16700000	0.8004	0.9662	0.7692	0.9737	0.9984	va_S
Chr1	16700000	16750000	0.76	0.8156	0.725	0.5868	0.8139	Specific
Chr1	16750000	16800000	0.9814	0.9748	0.9766	0.8298	0.758	Conserved
Chr1	16800000	16850000	0.96	0.9857	0.9767	0.8965	0.9619	va_N
Chr1	16850000	16900000	0.9392	0.9827	0.9812	0.9586	1	Conserved
Chr1	16900000	16950000	0.9392	0.8052	0.9749	0.9707	1	Conserved
Chr1	16950000	17000000	0.9392	0.6743	0.9452	0.8648	1	va_E
Chr1	17000000	17050000	0.8762	0.6661	0.9453	0.7475	1	va_E
Chr1	17050000	17100000	0.5405	0.5257	0.9457	0.5257	1	va_E
Chr1	17100000	17150000	0.5257	0.5257	0.9457	0.8394	1	va_E
Chr1	17150000	17200000	0.5257	0.5257	0.9611	0.942	1	va_E
Chr1	17200000	17250000	0.8173	0.8174	0.9967	0.9751	0.9928	va_E
Chr1	17250000	17300000	0.7879	0.9964	0.9977	0.9959	0.9972	Conserved
Chr1	17300000	17350000	0.9764	0.9762	0.9757	0.9046	0.9907	Conserved
Chr1	17350000	17400000	0.9858	0.9911	0.993	0.8867	1	Conserved
Chr1	17400000	17450000	0.9846	0.9894	0.9906	0.8307	0.78	Conserved
Chr1	17450000	17500000	0.8108	0.9126	0.9842	0.8279	1	va_E
Chr1	17500000	17550000	0.8868	0.8524	0.8848	0.8594	0.8936	Conserved
Chr1	17550000	17600000	0.9755	0.9268	0.9745	0.838	0.9818	Conserved
Chr1	17600000	17650000	0.9284	0.32	0.9307	0.3414	0.9982	Conserved
Chr1	17650000	17700000	0	0.223	0	0.2691	1	Specific
Chr1	17700000	17750000	0.9981	0.3612	0.9978	0.3048	0.9866	Conserved
Chr1	17750000	17800000	0.9969	0.6289	0.9966	0.5353	0.9965	Conserved
Chr1	17800000	17850000	0.9941	0.9658	0.9981	0.8794	1	Conserved
Chr1	17850000	17900000	0.9378	0.9502	0.9981	0.9429	1	va_E
Chr1	17900000	17950000	0.9599	0.9327	0.9938	0.9308	0.9788	va_E
Chr1	17950000	18000000	0.8521	0.8841	0.8598	0.8551	0.9921	va_N
Chr1	18000000	18050000	0.9748	0.9034	0.9749	0.8672	1	Conserved
Chr1	18050000	18100000	0.9659	0.967	0.9658	0.9477	0.9956	Conserved
Chr1	18100000	18150000	0.9697	0.9499	0.9698	0.8378	0.9714	Conserved
Chr1	18150000	18200000	0.8418	0.8324	0.7539	0.7159	0.9445	Specific
Chr1	18200000	18250000	0.8161	0.8027	0.9881	0.7466	0.9976	va_E
Chr1	18250000	18300000	0.7911	0.8294	0.652	0.7532	1	Specific
Chr1	18300000	18350000	0.7946	0.78	0.742	0.7652	1	Specific
Chr1	18350000	18400000	0.9423	0.9558	0.9098	0.9582	0.9919	Conserved
Chr1	18400000	18450000	0.7889	0.9911	0.7718	0.6996	1	va_N
Chr1	18450000	18500000	0.5584	0.9807	0.7895	0.7654	0.9977	va_N
Chr1	18500000	18550000	0.9391	0.8152	0.9324	0.8517	0.9804	va_W
Chr1	18550000	18600000	0.9078	0.8654	0.8971	0.7765	1	va_W
Chr1	18600000	18650000	0.8707	0.8966	0.7363	0.9221	0.9455	va_S
Chr1	18650000	18700000	0.7992	0.9285	0.8278	0.8202	0.9806	va_N
Chr1	18700000	18750000	0.8466	0.8295	0.8728	0.8622	1	va_E
Chr1	18750000	18800000	0.9565	0.8748	0.6985	0.904	0.9747	va_W
Chr1	18800000	18850000	0.9843	0.8988	0.9725	0.9515	0.9368	va_W
Chr1	18850000	18900000	0.9866	0.9815	0.8481	0.9728	0.9553	va_W
Chr1	18900000	18950000	0.896	0.7975	0.9895	0.8216	0.9119	va_E
Chr1	18950000	19000000	0.8104	0.918	0.9532	0.9189	0.998	va_E
Chr1	19000000	19050000	0.9678	0.9697	0.9741	0.9652	0.9824	Conserved
Chr1	19050000	19100000	0.929	0.9856	0.9454	0.9363	0.9865	va_N
Chr1	19100000	19150000	0.9664	0.9778	0.9704	0.9166	0.998	va_N
Chr1	19150000	19200000	0.984	0.9834	0.9795	0.9853	1	Conserved
Chr1	19200000	19250000	0.984	0.9694	0.8964	0.9853	1	Conserved
Chr1	19250000	19300000	0.8857	0.9715	0.8855	0.8828	0.979	va_N
Chr1	19300000	19350000	0.985	0.8859	0.9132	0.9696	1	va_W
Chr1	19350000	19400000	0.9133	0.8353	0.8556	0.9015	1	va_W
Chr1	19400000	19450000	0.6982	0.7037	0.7296	0.7681	0.7006	Specific
Chr1	19450000	19500000	0.9673	0.9708	0.9386	0.9019	0.8356	Conserved
Chr1	19500000	19550000	0.7718	0.848	0.8264	0.9687	0.683	va_S
Chr1	19550000	19600000	0.5711	0.5691	0.6537	0.9715	1	va_S
Chr1	19600000	19650000	0.985	0.9864	0.7466	0.9514	0.555	Conserved
Chr1	19650000	19700000	0.9948	0.9963	0.8734	0.9546	1	Conserved
Chr1	19700000	19750000	0.9903	0.8828	0.9564	0.9766	0.9979	va_W
Chr1	19750000	19800000	0.9432	0.7334	0.5154	0.4296	0.9562	va_W
Chr1	19800000	19850000	0.9576	0.9006	0.8133	0.8057	0.9791	va_W
Chr1	19850000	19900000	0.8835	0.8693	0.7061	0.8538	0.9965	va_W
Chr1	19900000	19950000	0.8528	0.8324	0.6963	0.9296	1	va_S
Chr1	19950000	20000000	0.8528	0.9049	0.8352	0.9004	1	Conserved
Chr1	20000000	20050000	0.8528	0.9049	0.8504	0.9004	1	Conserved
Chr1	20050000	20100000	0.8528	0.9231	0.8504	0.925	1	Conserved
Chr1	20100000	20150000	0.8987	0.9054	0.8504	0.925	1	va_S
Chr1	20150000	20200000	0.9925	0.899	0.9326	0.9479	1	va_W
Chr1	20200000	20250000	0.9601	0.9846	0.979	0.9479	1	va_N
Chr1	20250000	20300000	0.987	0.9787	0.9552	0.9522	1	va_W
Chr1	20300000	20350000	0.8929	0.9529	0.9455	0.743	0.9944	va_N
Chr1	20350000	20400000	0.9939	0.9377	0.9382	0.975	0.9708	va_W
Chr1	20400000	20450000	0.9513	0.904	0.8291	0.931	0.9562	va_W
Chr1	20450000	20500000	0.9221	0.9773	0.9645	0.9004	1	va_N
Chr1	20500000	20550000	0.9689	0.9791	0.9837	0.9756	0.8963	Conserved
Chr1	20550000	20600000	0.987	0.9836	0.9587	0.9665	0.9948	Conserved
Chr1	20600000	20650000	0.9908	0.9095	0.9711	0.9853	0.9972	va_W
Chr1	20650000	20700000	0.9872	0.9761	0.9865	0.9689	1	Conserved
Chr1	20700000	20750000	0.9724	0.9537	0.9712	0.9679	0.9089	Conserved
Chr1	20750000	20800000	0.9571	0.8097	0.8955	0.9666	1	va_S
Chr1	20800000	20850000	0.9332	0.9859	0.9685	0.9799	0.9698	va_N
Chr1	20850000	20900000	0.8858	0.9893	0.9765	0.9548	0.9951	va_N
Chr1	20900000	20950000	0.9346	0.9797	0.9456	0.8915	0.9956	va_N
Chr1	20950000	21000000	0.9509	0.9931	0.9713	0.9887	0.963	Conserved
Chr1	21000000	21050000	0.8583	0.9696	0.9501	0.8572	1	va_N
Chr1	21050000	21100000	0.9108	0.9416	0.8957	0.8554	0.9845	va_N
Chr1	21100000	21150000	0.6394	0.9583	0.937	0.7895	0.8795	va_N
Chr1	21150000	21200000	0.95	0.8287	0.8804	0.9583	1	va_S
Chr1	21200000	21250000	0.7042	0.5972	0.8556	0.2983	0.6957	va_E
Chr1	21250000	21300000	0.9175	0.9138	0.9678	0.2983	1	va_E
Chr1	21300000	21350000	0.9699	0.9869	0.9763	0.2983	1	va_N
Chr1	21350000	21400000	0.9465	0.9752	0.9654	0.9714	0.9747	Conserved
Chr1	21400000	21450000	0.9467	0.9572	0.9432	0.9456	0.8968	va_N
Chr1	21450000	21500000	0.9692	0.759	0.9695	0.6404	0.9972	Conserved
Chr1	21500000	21550000	0.9704	0.405	0.8552	0.5288	0.9989	va_W
Chr1	21550000	21600000	0.654	0.7418	0.7562	0.9284	0.8328	va_S
Chr1	21600000	21650000	0.9021	0.9811	0.9285	0.9024	0.969	va_N
Chr1	21650000	21700000	0.9499	0.9723	0.943	0.9362	0.8473	va_N
Chr1	21700000	21750000	0.9068	0.9469	0.911	0.9576	0.965	va_S
Chr1	21750000	21800000	0.8303	0.9852	0.9337	0.9788	0.9659	va_N
Chr1	21800000	21850000	0.9532	0.9827	0.987	0.9663	1	Conserved
Chr1	21850000	21900000	0.8632	0.9824	0.9691	0.9836	0.9973	Conserved
Chr1	21900000	21950000	0.8947	0.9816	0.9798	0.9775	1	Conserved
Chr1	21950000	22000000	0.9059	0.9774	0.9765	0.98	0.9868	Conserved
Chr1	22000000	22050000	0.9726	0.9742	0.9854	0.988	1	Conserved
Chr1	22050000	22100000	0.9709	0.9715	0.9707	0.9818	0.9828	va_S
Chr1	22100000	22150000	0.9629	0.9742	0.9314	0.9784	0.9743	Conserved
Chr1	22150000	22200000	0.955	0.9461	0.9482	0.9265	0.9978	va_W
Chr1	22200000	22250000	0.9853	0.9559	0.9881	0.981	0.9205	Conserved
Chr1	22250000	22300000	0.9959	0.9201	0.9912	0.978	1	Conserved
Chr1	22300000	22350000	0.963	0.9601	0.9949	0.9873	1	va_E
Chr1	22350000	22400000	0.9727	0.7708	0.9179	0.9104	0.9945	va_W
Chr1	22400000	22450000	0.7425	0.7765	0.9301	0.7368	0.9824	va_E
Chr1	22450000	22500000	0.9818	0.9153	0.9445	0.9788	0.9924	Conserved
Chr1	22500000	22550000	0.905	0.8515	0.9457	0.8349	0.9979	va_E
Chr1	22550000	22600000	0.7139	0.8938	0.9381	0.8727	0.9784	va_E
Chr1	22600000	22650000	0.9833	0.9715	0.973	0.9088	1	va_W
Chr1	22650000	22700000	0.9906	0.9786	0.9278	0.9444	0.9911	va_W
Chr1	22700000	22750000	0.9908	0.9903	0.8815	0.862	0.9187	Conserved
Chr1	22750000	22800000	0.9869	0.8662	0.8671	0.9752	0.9835	va_W
Chr1	22800000	22850000	0.9776	0.6445	0.9776	0.9573	0.9756	Conserved
Chr1	22850000	22900000	0.9574	0.9594	0.949	0.9499	0.9936	Conserved
Chr1	22900000	22950000	0.9383	0.9347	0.9611	0.9241	0.9424	va_E
Chr1	22950000	23000000	0.9005	0.7413	0.9007	0.4547	0.9974	Conserved
Chr1	23000000	23050000	0.6806	0.8079	0.6806	0.8293	0.9952	Specific
Chr1	23050000	23100000	0.849	0.9093	0.849	0.9819	0.9965	va_S
Chr1	23100000	23150000	0.994	0.9	0.9939	0.9513	1	Conserved
Chr1	23150000	23200000	0.9958	0.9821	0.997	0.956	0.9965	Conserved
Chr1	23200000	23250000	0.9959	0.9746	0.9972	0.8814	1	Conserved
Chr1	23250000	23300000	0.9837	0.9778	0.9749	0.9677	0.9943	va_W
Chr1	23300000	23350000	0.9781	0.9856	0.9764	0.7917	1	va_N
Chr1	23350000	23400000	0.9889	0.9835	0.9447	0.9847	0.9684	Conserved
Chr1	23400000	23450000	0.9503	0.9778	0.9449	0.9428	0.9471	va_N
Chr1	23450000	23500000	0.9721	0.9902	0.9884	0.9896	0.9977	Conserved
Chr1	23500000	23550000	0.958	0.9442	0.9304	0.9834	0.9977	va_S
Chr1	23550000	23600000	0.9657	0.8819	0.964	0.8298	1	Conserved
Chr1	23600000	23650000	0.968	0.9809	0.9665	0.8802	0.99	va_N
Chr1	23650000	23662833	0.994	0.9935	0.9939	0.9809	0.9896	Conserved
Chr10	0	50000	0	0.6617	0	0.6569	1	Specific
Chr10	50000	100000	0	0.7937	0.8979	0.6825	0.634	va_E
Chr10	100000	150000	0.8852	0.5219	0.9355	0.9696	0.8228	va_S
Chr10	150000	200000	0.9583	0.9568	0.9671	0.9733	0.1202	Specific
Chr10	200000	250000	0.9322	0.696	0.8061	0	0.8786	va_W
Chr10	250000	300000	0.9389	0.6024	0.6385	0.5224	1	va_W
Chr10	300000	350000	0.9512	0.5896	0.6226	0.7416	0.1388	Specific
Chr10	350000	400000	0.8777	0	0.7781	0	0.3993	va_W
Chr10	400000	450000	0.9391	0	0.8776	0.9325	0.2428	va_W
Chr10	450000	500000	0.7562	0.5669	0.66	0.7883	0.686	Specific
Chr10	500000	550000	0.9609	0.8459	0.8167	0.9715	0.888	va_S
Chr10	550000	600000	0.8739	0.9851	0.9795	0.9865	0.9754	Conserved
Chr10	600000	650000	0.9729	0.985	0.9775	0.9715	0.9864	va_N
Chr10	650000	700000	0.9617	0.9741	0.9596	0.9705	0.9951	Conserved
Chr10	700000	750000	0.8166	0.9448	0.9314	0.946	0.9672	Conserved
Chr10	750000	800000	0.9041	0.9619	0.9514	0.9723	0.9663	va_S
Chr10	800000	850000	0.8979	0.9268	0.915	0.8246	0.995	va_N
Chr10	850000	900000	0.7166	0.76	0.7789	0.7492	1	Specific
Chr10	900000	950000	0.7906	0.8241	0.7789	0.6977	1	Specific
Chr10	950000	1000000	0.9656	0.9841	0.9148	0.9738	0.9342	va_N
Chr10	1000000	1050000	0.9575	0.931	0.931	0.9465	1	va_W
Chr10	1050000	1100000	0.9575	0.8844	0.8844	0.9089	1	va_W
Chr10	1100000	1150000	0.9699	0.8397	0.8397	0.9254	0.9998	va_W
Chr10	1150000	1200000	0.8532	0.9758	0.9778	0.8902	0.9821	Conserved
Chr10	1200000	1250000	0.9768	0.9552	0.972	0.8865	0.9647	Conserved
Chr10	1250000	1300000	0.9868	0.9881	0.8538	0.9294	0.9946	Conserved
Chr10	1300000	1350000	0.9819	0.9827	0.8927	0.9706	0.9994	Conserved
Chr10	1350000	1400000	0.9677	0.9495	0.9192	0.9664	0.9953	Conserved
Chr10	1400000	1450000	0.9878	0.9874	0.99	0.9831	0.996	Conserved
Chr10	1450000	1500000	0.986	0.9816	0.9882	0.9869	0.9838	Conserved
Chr10	1500000	1550000	0.9655	0.9756	0.9786	0.9763	0.9958	Conserved
Chr10	1550000	1600000	0.8898	0.9922	0.9934	0.9919	0.9988	Conserved
Chr10	1600000	1650000	0.9215	0.9467	0.9038	0.9266	0.991	va_N
Chr10	1650000	1700000	0.9719	0.9411	0.966	0.9731	0.9917	Conserved
Chr10	1700000	1750000	0.9643	0.916	0.9357	0.9643	0.9979	Conserved
Chr10	1750000	1800000	0.9392	0.9156	0.8986	0.9392	1	Conserved
Chr10	1800000	1850000	0.9212	0.9202	0.926	0.9126	0.7364	Conserved
Chr10	1850000	1900000	0.9541	0.8245	0.8568	0	0.8241	va_W
Chr10	1900000	1950000	0.7015	0.9676	0.8881	0	0.277	va_N
Chr10	1950000	2000000	0.8829	0.9063	0.8645	0.9229	0.5289	va_S
Chr10	2000000	2050000	0.9647	0.9599	0.9519	0.9278	0.8859	Conserved
Chr10	2050000	2100000	0.976	0.9868	0.9858	0.7932	0.9881	Conserved
Chr10	2100000	2150000	0.9685	0.9848	0.9829	0.9742	0.9972	Conserved
Chr10	2150000	2200000	0.965	0.9867	0.9849	0.9833	0.9841	Conserved
Chr10	2200000	2250000	0.8559	0.9799	0.9487	0.9386	0.9634	va_N
Chr10	2250000	2300000	0.9067	0.9816	0.981	0.9822	0.9993	Conserved
Chr10	2300000	2350000	0.7565	0.9867	0.9877	0.9777	0.9905	Conserved
Chr10	2350000	2400000	0.907	0.9564	0.9736	0.9357	0.9762	va_E
Chr10	2400000	2450000	0.7447	0.8469	0.8552	0.9707	0.9731	va_S
Chr10	2450000	2500000	0.901	0.9431	0.9354	0.9382	0.9973	Conserved
Chr10	2500000	2550000	0.9213	0.8784	0.8762	0.8881	1	va_W
Chr10	2550000	2600000	0.9775	0.9875	0.9818	0.9757	1	va_N
Chr10	2600000	2650000	0.8751	0.9859	0.9495	0.9822	0.9987	Conserved
Chr10	2650000	2700000	0.9434	0.9253	0.7943	0.839	1	va_W
Chr10	2700000	2750000	0.9242	0.9311	0.7777	0.9071	1	va_N
Chr10	2750000	2800000	0.9695	0.9859	0.963	0.9745	0.9735	va_N
Chr10	2800000	2850000	0.9815	0.9834	0.9827	0.9863	0.9963	Conserved
Chr10	2850000	2900000	0.965	0.9585	0.9587	0.8035	0.9513	va_W
Chr10	2900000	2950000	0.9519	0.9187	0.924	0.9502	0.9975	Conserved
Chr10	2950000	3000000	0.9702	0.9655	0.98	0.964	0.9793	va_E
Chr10	3000000	3050000	0.9388	0.9764	0.9714	0.9703	0.9879	va_N
Chr10	3050000	3100000	0.9773	0.9858	0.9865	0.9829	0.9979	Conserved
Chr10	3100000	3150000	0.9794	0.9471	0.9717	0.9043	0.9968	va_W
Chr10	3150000	3200000	0.9576	0.6808	0.9046	0.9219	0.9458	va_W
Chr10	3200000	3250000	0.9488	0.9412	0.9839	0.9815	0.9873	Conserved
Chr10	3250000	3300000	0.9701	0.9959	0.9831	0.9807	1	va_N
Chr10	3300000	3350000	0.9655	0.9993	0.9772	0.9249	1	va_N
Chr10	3350000	3400000	0.2771	0.9993	0.9643	0.9381	1	va_N
Chr10	3400000	3450000	0.0388	0	0.9036	0.8655	1	va_E
Chr10	3450000	3500000	0.9579	0	0.7739	0.6448	1	va_W
Chr10	3500000	3550000	0.3007	0	0.2472	0.971	1	va_S
Chr10	3550000	3600000	0.0685	0.9373	0.2472	0	1	va_N
Chr10	3600000	3650000	0.0685	0.9373	0.2472	0.8029	1	va_N
Chr10	3650000	3700000	0.6761	0.9385	0.3996	0.9509	1	va_S
Chr10	3700000	3750000	0.6616	0.9696	0.8193	0.975	0.998	va_S
Chr10	3750000	3800000	0.6811	0.9825	0.6708	0.967	0.9797	va_N
Chr10	3800000	3850000	0.9171	0.9729	0.9338	0.9744	0.9534	Conserved
Chr10	3850000	3900000	0.9428	0.9789	0.9799	0.9491	0.9776	Conserved
Chr10	3900000	3950000	0.9445	0.9891	0.9531	0.7066	0.9704	va_N
Chr10	3950000	4000000	0.9712	0.991	0.8368	0.8061	0.4346	va_N
Chr10	4000000	4050000	0.8132	0.9859	0.611	0.9867	1	Conserved
Chr10	4050000	4100000	0.4759	0.8522	0.6298	0.8877	1	va_S
Chr10	4100000	4150000	0.1887	0.8151	0.611	0.7119	1	Specific
Chr10	4150000	4200000	0.2865	0.8151	0.611	0.7119	1	Specific
Chr10	4200000	4250000	0.9677	0.8758	0.8531	0.842	0.9761	va_W
Chr10	4250000	4300000	0.9027	0.9631	0.6693	0.7123	0.9974	va_N
Chr10	4300000	4350000	0.8477	0.6864	0.7648	0.6854	1	Specific
Chr10	4350000	4400000	0.9706	0.8887	0.8936	0.8239	1	va_W
Chr10	4400000	4450000	0.9986	0.9797	0.9864	0.9432	1	va_W
Chr10	4450000	4500000	0.9954	0.9588	0.8096	0.9635	1	va_W
Chr10	4500000	4550000	0.9959	0.7227	0.685	0.8246	0.9993	va_W
Chr10	4550000	4600000	0.9965	0.8619	0.832	0.8773	1	va_W
Chr10	4600000	4650000	0.9973	0.649	0.9743	0.8989	1	va_W
Chr10	4650000	4700000	0.9332	0.9455	0.963	0.8989	1	va_E
Chr10	4700000	4750000	0.631	0.8848	0.8976	0.7382	0.9515	va_E
Chr10	4750000	4800000	0.8386	0.7923	0.801	0.8646	0.9946	va_S
Chr10	4800000	4850000	0.9094	0.9575	0.9747	0.9778	0.9691	Conserved
Chr10	4850000	4900000	0.9289	0.9167	0.9822	0.9031	0.9889	va_E
Chr10	4900000	4950000	0.9661	0.7848	0.7325	0.7811	0.996	va_W
Chr10	4950000	5000000	0.9602	0.3319	0.3337	0.3205	1	va_W
Chr10	5000000	5050000	0.8598	0.9083	0.9783	0.9741	0.9736	Conserved
Chr10	5050000	5100000	0.8567	0.9261	0.9594	0.9675	0.9865	va_S
Chr10	5100000	5150000	0.8834	0.9513	0.9699	0.9632	0.9914	va_E
Chr10	5150000	5200000	0.7702	0.8805	0.9844	0.8741	1	va_E
Chr10	5200000	5250000	0.8787	0.9691	0.9777	0.9234	0.9965	va_E
Chr10	5250000	5300000	0.961	0.9739	0.9735	0.7341	0.9755	Conserved
Chr10	5300000	5350000	0.9469	0.9698	0.9678	0.8821	0.9973	Conserved
Chr10	5350000	5400000	0.8948	0.9068	0.9606	0.9619	0.9977	Conserved
Chr10	5400000	5450000	0.9005	0.9566	0.949	0.9738	0.9956	va_S
Chr10	5450000	5500000	0.8125	0.8682	0.9039	0.7973	0.924	va_E
Chr10	5500000	5550000	0.87	0.8462	0.8482	0.8696	0.9519	Conserved
Chr10	5550000	5600000	0.9167	0.9272	0.9285	0.91	0.9838	Conserved
Chr10	5600000	5650000	0.9714	0.9878	0.9912	0.9809	0.9814	Conserved
Chr10	5650000	5700000	0.8197	0.6188	0.7386	0.589	0.9403	Specific
Chr10	5700000	5750000	0.9695	0.8736	0.9458	0.9551	0.9838	va_W
Chr10	5750000	5800000	0.9733	0.989	0.963	0.8814	0.9977	va_N
Chr10	5800000	5850000	0.9737	0.9835	0.9655	0.8961	0.943	va_N
Chr10	5850000	5900000	0.9864	0.9342	0.9765	0.9881	1	Conserved
Chr10	5900000	5950000	0.9864	0.9307	0.9814	0.9858	0.9965	Conserved
Chr10	5950000	6000000	0.9783	0.9293	0.9863	0.9815	0.9154	Conserved
Chr10	6000000	6050000	0.9749	0.9361	0.9728	0.9101	0.953	Conserved
Chr10	6050000	6100000	0.9791	0.8998	0.9729	0.9736	0.9401	va_W
Chr10	6100000	6150000	0.9372	0.8475	0.794	0.9763	0.9977	va_S
Chr10	6150000	6200000	0.8811	0.8249	0.978	0.9756	1	Conserved
Chr10	6200000	6250000	0.931	0.9709	0.9793	0.8556	0.9539	va_E
Chr10	6250000	6300000	0.7397	0.922	0.8953	0.8738	0.9901	va_N
Chr10	6300000	6350000	0.676	0.9829	0.6287	0.713	1	va_N
Chr10	6350000	6400000	0.8353	0.9817	0.8113	0.8407	0.9962	va_N
Chr10	6400000	6450000	0.9666	0.9769	0.9867	0.9757	0.9824	va_E
Chr10	6450000	6500000	0.9779	0.9871	0.9935	0.9773	1	va_E
Chr10	6500000	6550000	0.6807	0.6878	0.9912	0.6956	0.9844	va_E
Chr10	6550000	6600000	0.8386	0.9272	0.9372	0.9905	0.9994	va_S
Chr10	6600000	6650000	0.9495	0.8103	0.9077	0.9516	1	Conserved
Chr10	6650000	6700000	0.874	0.9489	0.8849	0.8886	1	va_N
Chr10	6700000	6750000	0.8816	0.8802	0.8556	0.8902	0.9945	va_S
Chr10	6750000	6800000	0.9603	0.9672	0.9207	0.9748	0.9902	va_S
Chr10	6800000	6850000	0.9683	0.9641	0.8431	0.8379	0.7484	Conserved
Chr10	6850000	6900000	0.925	0.9787	0.827	0.9761	0.9877	Conserved
Chr10	6900000	6950000	0.9571	0.9527	0.8799	0.9551	0.9912	Conserved
Chr10	6950000	7000000	0.7833	0.9875	0.9727	0.8496	1	va_N
Chr10	7000000	7050000	0.7377	0.9917	0.9727	0.5888	1	va_N
Chr10	7050000	7100000	0.8038	0.987	0.982	0.7739	0.9788	va_N
Chr10	7100000	7150000	0.7927	0.9509	0.9582	0.9802	0.8542	va_S
Chr10	7150000	7200000	0.7072	0.9095	0.9096	0.988	0.995	va_S
Chr10	7200000	7250000	0.9699	0.9549	0.974	0.9502	0.9966	Conserved
Chr10	7250000	7300000	0.8561	0.9418	0.9694	0.9073	1	va_E
Chr10	7300000	7350000	0.9546	0.9814	0.9505	0.8902	1	va_N
Chr10	7350000	7400000	0.868	0.879	0.9193	0.8788	0.9995	va_E
Chr10	7400000	7450000	0.8817	0.902	0.9501	0.9005	0.9868	va_E
Chr10	7450000	7500000	0.8347	0.977	0.9768	0.9747	1	Conserved
Chr10	7500000	7550000	0.9228	0.9346	0.8337	0.9409	0.9943	va_S
Chr10	7550000	7600000	0.9712	0.9325	0.9341	0.7302	1	va_W
Chr10	7600000	7650000	0.9426	0.9846	0.9607	0.9415	0.9817	va_N
Chr10	7650000	7700000	0.9665	0.9359	0.857	0.9569	0.9939	va_W
Chr10	7700000	7750000	0.929	0.9101	0.9559	0.9159	0.8262	va_E
Chr10	7750000	7800000	0.8866	0.8866	0.879	0.8679	0.9823	Conserved
Chr10	7800000	7850000	0.8539	0.8539	0.8507	0.8154	0.9912	Conserved
Chr10	7850000	7900000	0.9846	0.9845	0.9777	0.8938	0.9953	Conserved
Chr10	7900000	7950000	0.9835	0.9835	0.9698	0.9844	0.9986	Conserved
Chr10	7950000	8000000	0.9861	0.9862	0.9807	0.9794	0.9842	Conserved
Chr10	8000000	8050000	0.9904	0.9562	0.9508	0.9489	0.9976	va_W
Chr10	8050000	8100000	0.9955	0.8402	0.9317	0.981	1	va_W
Chr10	8100000	8150000	0.968	0.9602	0.9737	0.9637	0.99	va_E
Chr10	8150000	8200000	0.9497	0.9773	0.9728	0.9678	0.9966	Conserved
Chr10	8200000	8250000	0.8383	0.915	0.8626	0.8649	0.9563	va_N
Chr10	8250000	8300000	0.817	0.9117	0.9631	0.9192	0.9723	va_E
Chr10	8300000	8350000	0.8727	0.8276	0.9305	0.928	0.9397	Conserved
Chr10	8350000	8400000	0.9174	0.9663	0.8262	0.928	1	va_N
Chr10	8400000	8450000	0.9555	0.9861	0.7774	0.9494	0.9992	va_N
Chr10	8450000	8500000	0.9406	0.9814	0.8821	0.9631	1	va_N
Chr10	8500000	8550000	0.7689	0.9557	0.787	0.8425	0.9199	va_N
Chr10	8550000	8600000	0.7915	0.8992	0.89	0.8982	0.9358	Conserved
Chr10	8600000	8650000	0.9696	0.817	0.8243	0.8008	0.9688	va_W
Chr10	8650000	8700000	0.9704	0.7053	0.9001	0.8743	0.7849	va_W
Chr10	8700000	8750000	0.935	0.988	0.9218	0.8762	0.7859	va_N
Chr10	8750000	8800000	0.9127	0.9485	0.9385	0.9712	0.9765	va_S
Chr10	8800000	8850000	0.9087	0.9476	0.9298	0.8506	1	va_N
Chr10	8850000	8900000	0.82	0.9566	0.7556	0.9448	0.9811	va_N
Chr10	8900000	8950000	0.7658	0.9862	0.7987	0.9887	1	Conserved
Chr10	8950000	9000000	0.9514	0.9164	0.9436	0.9581	0.9918	va_S
Chr10	9000000	9050000	0.9344	0.984	0.9366	0.9734	0.9783	va_N
Chr10	9050000	9100000	0.8928	0.983	0.9743	0.9188	0.9815	va_N
Chr10	9100000	9150000	0.7654	0.9488	0.8876	0.9879	0.9954	va_S
Chr10	9150000	9200000	0.534	0.947	0.7501	0.6474	1	va_N
Chr10	9200000	9250000	0.9621	0.947	0.7501	0.5128	1	va_W
Chr10	9250000	9300000	0.9659	0.947	0.7501	0.5594	1	va_W
Chr10	9300000	9350000	0.9661	0.947	0.7501	0.5594	1	va_W
Chr10	9350000	9400000	0.9659	0.947	0.8576	0.8008	1	va_W
Chr10	9400000	9450000	0.978	0.9684	0.7339	0.7442	1	va_W
Chr10	9450000	9500000	0.9975	0.9975	0.9827	0.9286	0.9988	Conserved
Chr10	9500000	9550000	0.9836	0.9836	0.9858	0.9631	0.9895	Conserved
Chr10	9550000	9600000	0.9652	0.9651	0.9815	0.9694	0.9369	va_E
Chr10	9600000	9650000	0.9737	0.9737	0.9795	0.9269	0.871	va_E
Chr10	9650000	9700000	0.9811	0.9828	0.88	0.9809	0.9806	Conserved
Chr10	9700000	9750000	0.9859	0.9938	0.9247	0.9481	1	va_N
Chr10	9750000	9800000	0.9863	0.994	0.848	0.9065	1	va_N
Chr10	9800000	9850000	0.9361	0.9053	0.8509	0.9518	1	va_S
Chr10	9850000	9900000	0.9401	0.997	0.8781	0.8921	1	va_N
Chr10	9900000	9950000	0.9407	0.997	0.7849	0.7799	1	va_N
Chr10	9950000	10000000	0.8675	0.9799	0.8631	0.8545	0.9424	va_N
Chr10	10000000	10050000	0.9736	0.9741	0.9766	0.8383	0.9966	Conserved
Chr10	10050000	10100000	0.9508	0.9511	0.9488	0.9811	0.9939	va_S
Chr10	10100000	10150000	0.8248	0.8249	0.9113	0.9786	0.9883	va_S
Chr10	10150000	10200000	0.8864	0.8966	0.8811	0.947	0.9771	va_S
Chr10	10200000	10250000	0.4158	0.4111	0.4167	0.9912	0.9962	va_S
Chr10	10250000	10300000	0.8816	0.9177	0.9101	0.9496	0.9203	va_S
Chr10	10300000	10350000	0.8602	0.7685	0.8703	0.8551	0.8901	va_E
Chr10	10350000	10400000	0.975	0.9591	0.9627	0.9637	0.9701	va_W
Chr10	10400000	10450000	0.9589	0.9248	0.9141	0.9802	0.9935	va_S
Chr10	10450000	10500000	0.8169	0.8607	0.9302	0.9819	0.9914	va_S
Chr10	10500000	10550000	0.8659	0.9878	0.99	0.9654	1	Conserved
Chr10	10550000	10600000	0.9712	0.8976	0.9741	0.9632	0.8038	Conserved
Chr10	10600000	10650000	0.8283	0.8927	0.9609	0.9742	0.9921	va_S
Chr10	10650000	10700000	0.8374	0.9295	0.9382	0.9727	1	va_S
Chr10	10700000	10750000	0.9375	0.598	0.501	0.9964	1	va_S
Chr10	10750000	10800000	0.9375	0.6346	0.7054	0.9964	1	va_S
Chr10	10800000	10850000	0.9375	0.9532	0.8601	0.9859	1	va_S
Chr10	10850000	10900000	0.9375	0.9612	0.2474	0.5298	1	va_N
Chr10	10900000	10950000	0.9375	0	0.684	0.634	1	va_W
Chr10	10950000	11000000	0.9375	0.9412	0.8658	0.9043	1	Conserved
Chr10	11000000	11050000	0.9596	0.9007	0.8619	0.9071	0.9316	va_W
Chr10	11050000	11100000	0.9491	0.9524	0.8192	0.8625	0.754	Conserved
Chr10	11100000	11150000	0.9512	0.9859	0.9915	0.9697	0.9748	va_E
Chr10	11150000	11200000	0.8098	0.9917	0.9914	0.948	0.988	Conserved
Chr10	11200000	11250000	0.7961	0.9901	0.9643	0.8039	0.54	va_N
Chr10	11250000	11300000	0	0	0.5347	0	0.2175	Specific
Chr10	11300000	11350000	0.8526	0.9536	0.5749	0.9133	0.8794	va_N
Chr10	11350000	11400000	0.8526	0.9536	0	0.9133	1	va_N
Chr10	11400000	11450000	0.8526	0.9536	0	0.9133	1	va_N
Chr10	11450000	11500000	0.8526	0.9536	0	0.9133	1	va_N
Chr10	11500000	11550000	0.8526	0.9536	0.9513	0.9133	1	Conserved
Chr10	11550000	11600000	0.9479	0.9729	0.9687	0.925	0.9874	Conserved
Chr10	11600000	11650000	0.8278	0.8278	0.8192	0.8515	0.9985	va_S
Chr10	11650000	11700000	0.9093	0.9093	0.8865	0.8562	0.9912	Conserved
Chr10	11700000	11750000	0.9423	0.9423	0.8917	0.8021	1	Conserved
Chr10	11750000	11800000	0.7277	0.7277	0.9758	0.9562	0.9949	va_E
Chr10	11800000	11850000	0.8512	0.8622	0.9766	0.909	0.9509	va_E
Chr10	11850000	11900000	0.9101	0.9473	0.9188	0.9117	0.9946	va_N
Chr10	11900000	11950000	0.9681	0.9816	0.9627	0.9695	0.9659	va_N
Chr10	11950000	12000000	0.9679	0.9875	0.9828	0.9863	0.9656	Conserved
Chr10	12000000	12050000	0.9348	0.9788	0.8732	0.8892	0.9888	va_N
Chr10	12050000	12100000	0.9792	0.9742	0.8705	0.921	0.9885	va_W
Chr10	12100000	12150000	0.9822	0.9472	0.8664	0.8864	1	va_W
Chr10	12150000	12200000	0.9792	0.9472	0.8711	0.9583	1	va_W
Chr10	12200000	12250000	0.958	0.9494	0.9782	0.9511	0.9879	va_E
Chr10	12250000	12300000	0.9822	0.9637	0.9761	0.9746	1	va_W
Chr10	12300000	12350000	0.9816	0.9637	0.9812	0.9828	1	Conserved
Chr10	12350000	12400000	0.9866	0.9637	0.9863	0.9441	1	Conserved
Chr10	12400000	12450000	0.8992	0.9637	0.8977	0.9158	1	va_N
Chr10	12450000	12500000	0.612	0.6675	0.612	0.9212	0.9995	va_S
Chr10	12500000	12550000	0.6015	0.585	0.6014	0.9688	0.9883	va_S
Chr10	12550000	12600000	0.9761	0.9445	0.9726	0.9518	0.9931	Conserved
Chr10	12600000	12650000	0.9867	0.9799	0.8556	0.9807	0.9976	va_W
Chr10	12650000	12700000	0.8098	0.7893	0.8294	0.831	0.8935	Specific
Chr10	12700000	12750000	0.8689	0.8126	0.7343	0.7827	0.831	va_W
Chr10	12750000	12800000	0.9838	0.8973	0.8855	0.969	0.9771	va_W
Chr10	12800000	12850000	0.9904	0.9479	0.9627	0.9369	0.9937	va_W
Chr10	12850000	12900000	0.9583	0.7735	0.8415	0.7022	1	va_W
Chr10	12900000	12950000	0	0.7735	0.8153	0.7022	1	Specific
Chr10	12950000	13000000	0.8961	0.844	0.7304	0.7022	1	va_W
Chr10	13000000	13050000	0.8961	0.8578	0.9052	0.7896	1	va_E
Chr10	13050000	13100000	0.7178	0.7553	0.7857	0.9199	0.939	va_S
Chr10	13100000	13150000	0.3602	0.7698	0.5361	0.8382	1	Specific
Chr10	13150000	13200000	0.8353	0.8192	0.4292	0.8394	1	Specific
Chr10	13200000	13250000	0.9533	0.919	0.6605	0.9201	1	va_W
Chr10	13250000	13300000	0.9578	0.9488	0.815	0.8854	0.9961	va_W
Chr10	13300000	13350000	0.7356	0.7851	0.8918	0.6044	0.9872	va_E
Chr10	13350000	13400000	0.5453	0.8817	0.523	0.4813	0.7441	va_N
Chr10	13400000	13450000	0.9319	0.9293	0.9599	0.7158	0.967	va_E
Chr10	13450000	13500000	0.9422	0.9419	0.9903	0.9359	0.9923	va_E
Chr10	13500000	13550000	0.8736	0.9037	0.972	0.9494	0.788	va_E
Chr10	13550000	13600000	0.9646	0.962	0.9409	0.9641	0.9559	Conserved
Chr10	13600000	13650000	0.8471	0.923	0.8673	0.8768	0.9818	va_N
Chr10	13650000	13700000	0.7243	0.7013	0.7002	0.7852	0.9981	Specific
Chr10	13700000	13750000	0.9554	0.8846	0.8409	0.7863	0.8796	va_W
Chr10	13750000	13800000	0.967	0.9666	0.9802	0.782	0.2459	va_E
Chr10	13800000	13850000	0.5498	0.5372	0.9945	0.5996	1	va_E
Chr10	13850000	13900000	0.4851	0.4863	0.9945	0.6611	1	va_E
Chr10	13900000	13950000	0.8904	0.8907	0.9852	0.8681	0.7441	va_E
Chr10	13950000	14000000	0.8969	0.8968	0	0.6643	0.7967	Conserved
Chr10	14000000	14050000	0.9557	0.9558	0	0.3293	0.3321	Conserved
Chr10	14050000	14100000	0.9198	0.9043	0	0.9365	0.4462	va_S
Chr10	14100000	14150000	0.8598	0.7832	0	0.9723	1	va_S
Chr10	14150000	14200000	0.9831	0.8606	0.9954	0.9754	0.7427	va_E
Chr10	14200000	14250000	0.9815	0.8989	0.9951	0.9699	1	va_E
Chr10	14250000	14300000	0.6953	0.8689	0.9133	0.8661	0.6338	va_E
Chr10	14300000	14350000	0.6063	0.835	0.9171	0.7951	1	va_E
Chr10	14350000	14400000	0.7987	0.8228	0.967	0.7747	0.9933	va_E
Chr10	14400000	14450000	0.9073	0.9867	0.9883	0.8365	1	Conserved
Chr10	14450000	14500000	0.8942	0.9867	0.9876	0.7211	1	Conserved
Chr10	14500000	14550000	0.7802	0.8562	0.8569	0.8221	0.5877	Conserved
Chr10	14550000	14600000	0.4175	0.5963	0.4656	0.3718	0.9411	Specific
Chr10	14600000	14650000	0.3349	0.6563	0.1259	0.2564	1	Specific
Chr10	14650000	14700000	0.3349	0.763	0.102	0.2564	1	Specific
Chr10	14700000	14750000	0.3349	0.9253	0.2565	0.2657	1	va_N
Chr10	14750000	14800000	0.3349	0.9253	0.6367	0.9586	1	va_S
Chr10	14800000	14850000	0.3349	0.2139	0.6233	0.8952	1	va_S
Chr10	14850000	14900000	0.9598	0.0953	0.6717	0.7847	1	va_W
Chr10	14900000	14950000	0	0.2972	0.9806	0.9634	1	va_E
Chr10	14950000	15000000	0	0.4854	0.9806	0.8789	1	va_E
Chr10	15000000	15050000	0	0.8465	0	0.9705	1	va_S
Chr10	15050000	15100000	0	0.8883	0.9967	0.9097	0.9949	va_E
Chr10	15100000	15150000	0	0.6268	0.9967	0.7506	1	va_E
Chr10	15150000	15200000	0.9415	0.9194	0.989	0.8065	0.8701	va_E
Chr10	15200000	15250000	0.895	0.8303	0.9612	0.9983	1	va_S
Chr10	15250000	15300000	0.9744	0.863	0.9612	0.9987	1	va_S
Chr10	15300000	15350000	0.9444	0.8404	0.9514	0.955	0.9644	Conserved
Chr10	15350000	15400000	0.8939	0.9164	0.9163	0.9796	0.963	va_S
Chr10	15400000	15450000	0.9259	0.9103	0.9101	0.8948	0.9668	va_W
Chr10	15450000	15500000	0.9233	0.8571	0.8571	0.9	0.5063	va_W
Chr10	15500000	15550000	0.8663	0.9329	0.8482	0.7264	0.5459	va_N
Chr10	15550000	15600000	0.9345	0.8751	0.8869	0.823	0.9505	va_W
Chr10	15600000	15650000	0.7404	0.7334	0.7078	0.7041	0.9986	Specific
Chr10	15650000	15700000	0.9873	0.978	0.9599	0.9402	1	va_W
Chr10	15700000	15750000	0.9468	0.9239	0.9715	0.9679	0.9753	Conserved
Chr10	15750000	15800000	0.9686	0.7451	0.6977	0.9258	1	va_W
Chr10	15800000	15850000	0.9208	0.8812	0.8228	0.905	0.9537	va_W
Chr10	15850000	15900000	0.8237	0.8586	0.8008	0.8688	1	va_S
Chr10	15900000	15950000	0.8064	0.6522	0.8008	0.7132	1	Specific
Chr10	15950000	16000000	0.6815	0.7514	0.7377	0.7469	0.9825	Specific
Chr10	16000000	16050000	0.9546	0.885	0.9203	0.8761	0.9103	va_W
Chr10	16050000	16100000	0.9576	0.9659	0.9326	0.9553	0.894	va_N
Chr10	16100000	16150000	0.9661	0.8442	0.3529	0.9161	0.9659	va_W
Chr10	16150000	16200000	0.8539	0.7967	0.5116	0.8936	1	va_S
Chr10	16200000	16250000	0.7733	0.7733	0.8783	0.6992	1	va_E
Chr10	16250000	16300000	0.9147	0.9295	0.6574	0.7379	0.9969	va_N
Chr10	16300000	16350000	0.9302	0.9902	0.8538	0.717	1	va_N
Chr10	16350000	16400000	0.9302	0.9382	0.6224	0.8634	1	va_N
Chr10	16400000	16450000	0.8207	0.945	0.8836	0.9093	0.9955	va_N
Chr10	16450000	16500000	0.9201	0.9263	0.7295	0.9567	0.9482	va_S
Chr10	16500000	16550000	0.7506	0.7754	0.6512	0.7343	0.8267	Specific
Chr10	16550000	16600000	0.9636	0.9448	0.6304	0.9635	0.6933	Conserved
Chr10	16600000	16650000	0.8428	0.9078	0.9768	0.8667	0.9862	va_E
Chr10	16650000	16700000	0.804	0.9031	0.7921	0.8423	1	va_N
Chr10	16700000	16750000	0.8035	0.8981	0.5181	0.8348	1	va_N
Chr10	16750000	16800000	0.9288	0.9319	0.7012	0.7539	0.9315	Conserved
Chr10	16800000	16850000	0.9443	0.7727	0.9428	0.6811	1	Conserved
Chr10	16850000	16900000	0.9276	0.7703	0.8598	0.4941	1	va_W
Chr10	16900000	16950000	0.6642	0.9674	0.8917	0.8128	0.8626	va_N
Chr10	16950000	17000000	0.9763	0.9726	0.948	0.9786	0.9292	Conserved
Chr10	17000000	17050000	0.9069	0.9747	0.9157	0.9357	0.9705	va_N
Chr10	17050000	17100000	0.8492	0.6344	0.7292	0.5726	1	Specific
Chr10	17100000	17150000	0.9056	0.9771	0.9891	0.8345	0.9908	va_E
Chr10	17150000	17200000	0.854	0.6457	0.9965	0.5801	1	va_E
Chr10	17200000	17250000	0.854	0.5479	0.9973	0.6563	1	va_E
Chr10	17250000	17300000	0.854	0.7821	0.7191	0.8485	1	va_W
Chr10	17300000	17350000	0.9297	0.9311	0.9184	0.9388	0.9967	va_S
Chr10	17350000	17400000	0.9926	0.9743	0.9936	0.9855	1	Conserved
Chr10	17400000	17450000	0.8236	0.9747	0.8541	0.9599	1	va_N
Chr10	17450000	17500000	0.8378	0.5844	0.9128	0.8487	1	va_E
Chr10	17500000	17550000	0.6974	0.8501	0.8807	0.8114	1	va_E
Chr10	17550000	17600000	0.9245	0.9212	0.8771	0.7966	1	Conserved
Chr10	17600000	17650000	0.9126	0.9212	0.8771	0.7966	1	va_N
Chr10	17650000	17700000	0.9126	0.9212	0.8771	0.7966	1	va_N
Chr10	17700000	17750000	0.9126	0.9212	0.8779	0.805	1	va_N
Chr10	17750000	17800000	0.9147	0.9833	0.8867	0.8107	1	va_N
Chr10	17800000	17850000	0.943	0.9901	0.9447	0.6166	0.9481	va_N
Chr10	17850000	17900000	0.9452	0.952	0.8649	0.838	1	va_N
Chr10	17900000	17950000	0.9758	0.9746	0.8735	0.8943	0.9866	Conserved
Chr10	17950000	18000000	0.9786	0.9727	0.8581	0.8795	1	va_W
Chr10	18000000	18050000	0.9483	0.9483	0.8617	0.8795	1	Conserved
Chr10	18050000	18100000	0.9588	0.9623	0.9603	0.9645	0.9166	Conserved
Chr10	18100000	18150000	0.6516	0.6516	0.6511	0.6904	0.9823	Specific
Chr10	18150000	18200000	0.7448	0.7448	0.7932	0.6802	0.998	Specific
Chr10	18200000	18250000	0.8497	0.8192	0.7995	0.9066	0.9906	va_S
Chr10	18250000	18300000	0.8644	0.8644	0.9713	0.9121	0.9736	va_E
Chr10	18300000	18350000	0.6529	0.6528	0.6501	0.8413	0.7934	Specific
Chr10	18350000	18400000	0.907	0.907	0.5056	0.928	0.8053	va_S
Chr10	18400000	18450000	0.9437	0.9437	0.9583	0.9319	0.7797	va_E
Chr10	18450000	18500000	0.9375	0.9375	0.8229	0.8619	1	Conserved
Chr10	18500000	18550000	0.9375	0.9375	0.8229	0.7681	1	Conserved
Chr10	18550000	18600000	0.1336	0.1335	0.8801	0.4151	1	va_E
Chr10	18600000	18650000	0.8701	0.8694	0.9695	0.8477	0.9837	va_E
Chr10	18650000	18700000	0.8843	0.8843	0.9365	0.9111	0.8813	va_E
Chr10	18700000	18750000	0.9002	0.9003	0.9608	0.8472	0.9628	va_E
Chr10	18750000	18800000	0.7969	0.7969	0.8881	0.8328	1	va_E
Chr10	18800000	18850000	0.7969	0.7969	0.952	0.8225	1	va_E
Chr10	18850000	18900000	0.962	0.962	0.9591	0.8215	0.9659	Conserved
Chr10	18900000	18950000	0.9803	0.9803	0	0.9433	0.9992	Conserved
Chr10	18950000	19000000	0.7151	0.7789	0.9251	0.8677	1	va_E
Chr10	19000000	19050000	0.984	0.9882	0.8606	0.8457	1	Conserved
Chr10	19050000	19100000	0.9884	0.9884	0.8606	0.8457	1	Conserved
Chr10	19100000	19150000	0.9934	0.9933	0.925	0.7456	0.9994	Conserved
Chr10	19150000	19200000	0.9914	0.9852	0.9431	0.7197	1	va_W
Chr10	19200000	19250000	0.9967	0.995	0.9431	0.7277	1	Conserved
Chr10	19250000	19300000	0.848	0.8175	0.8049	0.7573	1	Specific
Chr10	19300000	19350000	0.9031	0.9267	0.8897	0.9413	1	va_S
Chr10	19350000	19400000	0.878	0.878	0.9061	0	0.4338	va_E
Chr10	19400000	19450000	0.9023	0.9535	0.8813	0.825	1	va_N
Chr10	19450000	19500000	0.9085	0.8191	0.8818	0.789	1	va_W
Chr10	19500000	19550000	0.6856	0.6715	0.7808	0.7073	1	Specific
Chr10	19550000	19600000	0.8389	0.8159	0.8485	0.8481	1	Specific
Chr10	19600000	19650000	0.8741	0.8536	0.8709	0.8509	1	Conserved
Chr10	19650000	19700000	0	0	0	0	0	Specific
Chr10	19700000	19750000	0	0	0	0	0	Specific
Chr10	19750000	19800000	0	0	0	0	0	Specific
Chr10	19800000	19850000	0	0	0	0	0	Specific
Chr10	19850000	19900000	0.9984	0.9748	0.9748	0.9753	0.917	va_W
Chr10	19900000	19950000	0.999	0.8631	0.8581	0.8583	1	va_W
Chr10	19950000	20000000	0.9993	0.815	0.8013	0.7771	0.99	va_W
Chr10	20000000	20050000	0.9994	0.9497	0.9528	0.9581	1	va_W
Chr10	20050000	20100000	0.9994	0.986	0.9903	0.8762	1	va_W
Chr10	20100000	20150000	0.9994	0.8835	0.9903	0.8835	1	va_W
Chr10	20150000	20200000	0.9994	0.7045	0.9027	0.7678	1	va_W
Chr10	20200000	20250000	0.9994	0.9281	0.9535	0.9363	1	va_W
Chr10	20250000	20300000	0.9994	0.9696	0.8822	0.9881	1	va_W
Chr10	20300000	20350000	0.9994	0.9148	0.8876	0.962	1	va_W
Chr10	20350000	20400000	0.9994	0.995	0.8461	0.7662	1	Conserved
Chr10	20400000	20450000	0.9956	0.9946	0.7396	0.8105	0.9968	Conserved
Chr10	20450000	20500000	0.9488	0.98	0.7128	0.8213	0.9938	va_N
Chr10	20500000	20550000	0.8601	0.7915	0.935	0.7567	0.9962	va_E
Chr10	20550000	20600000	0.9553	0.8904	0.8801	0.8529	1	va_W
Chr10	20600000	20650000	0.8499	0.8725	0.8429	0.8745	0.9846	Conserved
Chr10	20650000	20700000	0.8112	0.8331	0.6455	0.7354	0.9948	Specific
Chr10	20700000	20750000	0.7869	0.7991	0.8556	0.7249	1	va_E
Chr10	20750000	20800000	0.804	0.7414	0.7865	0.7944	1	Specific
Chr10	20800000	20850000	0.8403	0.7306	0.9028	0.8337	1	va_E
Chr10	20850000	20900000	0.9322	0.9507	0.876	0.7517	1	va_N
Chr10	20900000	20950000	0.9327	0.949	0.8835	0.7733	1	va_N
Chr10	20950000	21000000	0.9374	0.9512	0.8947	0.8009	1	va_N
Chr10	21000000	21050000	0.9322	0.9518	0.876	0.7935	1	va_N
Chr10	21050000	21100000	0.9322	0.947	0.876	0.9606	1	va_S
Chr10	21100000	21150000	0.9259	0.8844	0.8823	0.8435	0.995	va_W
Chr10	21150000	21200000	0.9359	0.5068	0.8667	0.8516	0.9614	va_W
Chr10	21200000	21250000	0	0	0	0.7896	0.2203	Specific
Chr10	21250000	21300000	0.9523	0.9742	0.9516	0.9645	0.7828	va_N
Chr10	21300000	21350000	0.8303	0.9778	0.7957	0.8555	0.9127	va_N
Chr10	21350000	21400000	0.7969	0.9785	0.8914	0.9724	0.9402	va_N
Chr10	21400000	21450000	0.7698	0.5909	0.6878	0.7047	0.9521	Specific
Chr10	21450000	21500000	0.9709	0.9722	0.8405	0.6822	0.8696	Conserved
Chr10	21500000	21550000	0.6358	0.8144	0.6565	0.7863	1	Specific
Chr10	21550000	21600000	0.7394	0.9069	0.7504	0.8705	0.8986	va_N
Chr10	21600000	21650000	0.9636	0.9191	0.9206	0.9502	0.7119	va_W
Chr10	21650000	21700000	0.7592	0.9133	0.9727	0	0.9335	va_E
Chr10	21700000	21750000	0.7501	0.9162	0.3507	0.4686	0.8202	va_N
Chr10	21750000	21800000	0.3793	0.9814	0.3817	0.3977	0.9859	va_N
Chr10	21800000	21850000	0.5405	0.7895	0.742	0.7804	0.909	Specific
Chr10	21850000	21900000	0.8786	0.8782	0.9051	0.9242	0.9935	va_S
Chr10	21900000	21950000	0.945	0.8259	0.9234	0.6844	0.7708	va_W
Chr10	21950000	22000000	0.1993	0.8224	0.5218	0.9575	0.8839	va_S
Chr10	22000000	22050000	0.8013	0.5894	0.3353	0.7047	0.6056	Specific
Chr10	22050000	22100000	0	0	0.2488	0	0.8608	Specific
Chr10	22100000	22150000	0.8751	0.8659	0.8697	0.8856	0.9624	va_S
Chr10	22150000	22200000	0.8525	0.9634	0.8524	0.9623	0.9653	Conserved
Chr10	22200000	22250000	0.9453	0.9558	0.967	0.681	0.8605	va_E
Chr10	22250000	22300000	0.9713	0.8069	0.8342	0.9106	0.9216	va_W
Chr10	22300000	22350000	0.9666	0.9409	0.9412	0.9587	0.9423	va_W
Chr10	22350000	22400000	0.9004	0.948	0.7821	0.9447	0.9923	Conserved
Chr10	22400000	22450000	0.4907	0.9544	0.8013	0.6842	1	va_N
Chr10	22450000	22500000	0.8844	0.8897	0.8277	0.8183	1	va_N
Chr10	22500000	22550000	0.976	0.8821	0.8864	0.5563	1	va_W
Chr10	22550000	22600000	0.9576	0.8719	0.862	0.1825	1	va_W
Chr10	22600000	22650000	0.9634	0.8719	0.862	0.5574	1	va_W
Chr10	22650000	22700000	0.9202	0.8719	0.8843	0.7809	1	va_W
Chr10	22700000	22750000	0.8895	0.8483	0.8513	0.9801	1	va_S
Chr10	22750000	22800000	0.897	0.7463	0.6522	0.097	0.9166	va_W
Chr10	22800000	22850000	0.7911	0.745	0	0.097	1	Specific
Chr10	22850000	22900000	0.6133	0.7392	0.9818	0.097	0.6545	va_E
Chr10	22900000	22950000	0.9504	0.9841	0.8759	0.9498	0.875	va_N
Chr10	22950000	23000000	0.9575	0	0.8753	0.8123	0.6764	va_W
Chr10	23000000	23050000	0	0	0	0	0	Specific
Chr10	23050000	23100000	0.9762	0	0.6802	0.9036	0.5793	va_W
Chr10	23100000	23150000	0.9763	0.6678	0.5714	0	1	va_W
Chr10	23150000	23200000	0.9762	0.6149	0	0	1	va_W
Chr10	23200000	23250000	0.9762	0.6845	0.6137	0.6184	1	va_W
Chr10	23250000	23300000	0.9931	0.6447	0.5356	0.995	1	Conserved
Chr10	23300000	23350000	0.9933	0.75	0.6593	0.9945	0.9954	Conserved
Chr10	23350000	23400000	0.9885	0.8324	0.761	0.9924	0.9989	Conserved
Chr10	23400000	23450000	0.8135	0.7945	0.6963	0.9655	1	va_S
Chr10	23450000	23500000	0.8135	0.7888	0.7014	0.8687	1	va_S
Chr10	23500000	23550000	0.8135	0.7888	0.8605	0.9748	1	va_S
Chr10	23550000	23600000	0.8223	0.7888	0	0	1	Specific
Chr10	23600000	23650000	0.8196	0.7888	0	0.9606	0.3723	va_S
Chr10	23650000	23700000	0.9883	0	0	0	0.7656	va_W
Chr10	23700000	23750000	0	0.9605	0.9602	0	0.0804	Specific
Chr10	23750000	23800000	0.8907	0	0	0	0.4348	va_W
Chr10	23800000	23850000	0.3359	0	0	0	0.7045	Specific
Chr10	23850000	23900000	0.9505	0.9586	0.9577	0	0.5022	Conserved
Chr10	23900000	23950000	0.9432	0.9505	0.9538	0	0.8356	Conserved
Chr10	23950000	24000000	0.6971	0.9225	0.8874	0	0.9699	va_N
Chr10	24000000	24050000	0.5822	0.774	0.5886	0	0.9333	Specific
Chr10	24050000	24100000	0.4557	0.5981	0.6701	0	0.9539	Specific
Chr10	24100000	24150000	0.1597	0.272	0.7481	0.7576	1	Specific
Chr10	24150000	24200000	0.8686	0.6907	0.8189	0.8196	0.9216	va_W
Chr10	24200000	24250000	0.8383	0.7477	0.8699	0.9562	1	va_S
Chr10	24250000	24300000	0.8335	0.8911	0.8981	0.8099	0.9994	va_E
Chr10	24300000	24350000	0.8152	0.7352	0.8206	0.78	1	Specific
Chr10	24350000	24400000	0.8152	0.6068	0.9604	0.6604	1	va_E
Chr10	24400000	24450000	0.8152	0.711	0	0.7732	1	Specific
Chr10	24450000	24500000	0.5524	0.6154	0.594	0.782	1	Specific
Chr10	24500000	24550000	0.5833	0.6053	0.6988	0.9202	1	va_S
Chr10	24550000	24600000	0.8021	0.7068	0.9558	0.8698	0.9466	va_E
Chr10	24600000	24650000	0.9037	0.9006	0.9613	0.8389	0.9968	va_E
Chr10	24650000	24700000	0.9091	0.9087	0.9311	0.9462	0.9863	va_S
Chr10	24700000	24750000	0.9433	0.9604	0.9365	0.7088	1	va_N
Chr10	24750000	24800000	0.974	0.974	0.9271	0.9728	1	Conserved
Chr10	24800000	24850000	0.9042	0.903	0.9646	0.9035	0.7245	va_E
Chr10	24850000	24900000	0.8112	0.8111	0.8898	0.8429	1	va_E
Chr10	24900000	24950000	0.8896	0.8896	0.9807	0.8214	0.9995	va_E
Chr10	24950000	25000000	0.7842	0.7842	0.8393	0.9308	0.9954	va_S
Chr10	25000000	25050000	0.9538	0.9536	0.9572	0.9843	0.9961	va_S
Chr10	25050000	25100000	0.9695	0.9722	0.9572	0.6019	1	Conserved
Chr10	25100000	25150000	0.4361	0.4044	0.9572	0.6019	1	va_E
Chr10	25150000	25200000	0.7162	0.6998	0.9357	0.7129	0.9981	va_E
Chr10	25200000	25250000	0.8037	0.8031	0.762	0.8211	0.9697	Specific
Chr10	25250000	25300000	0.6583	0.6587	0.6623	0.9344	0.9966	va_S
Chr10	25300000	25350000	0.975	0.9746	0.9865	0.9597	1	va_E
Chr10	25350000	25400000	0.9573	0.9841	0.9841	0.961	1	Conserved
Chr10	25400000	25450000	0.9974	0.9974	0.9876	0.8778	1	Conserved
Chr10	25450000	25500000	0.9976	0.9842	0.9477	0.7976	1	va_W
Chr10	25500000	25550000	0.998	0.96	0.9982	0.8535	1	Conserved
Chr10	25550000	25600000	0.998	0.96	0.9982	0.8658	1	Conserved
Chr10	25600000	25650000	0.998	0.9599	0.9982	0.862	1	Conserved
Chr10	25650000	25700000	0.8223	0.8213	0.8755	0.8036	0.7306	va_E
Chr10	25700000	25750000	0	0.9426	0	0	0.1773	Specific
Chr10	25750000	25800000	0	0	0	0	0	Specific
Chr10	25800000	25850000	0	0	0	0	0	Specific
Chr10	25850000	25858247	0	0	0	0	0	Specific
Chr11	0	50000	0.9659	0.9598	0.9864	0.9349	0.9779	va_E
Chr11	50000	100000	0.8991	0.8863	0.9966	0.8219	1	va_E
Chr11	100000	150000	0.8469	0.9702	0.9928	0.8868	0.9769	va_E
Chr11	150000	200000	0.8327	0.9295	0.8842	0.9045	1	va_N
Chr11	200000	250000	0.9825	0.9164	0.8699	0.9079	1	va_W
Chr11	250000	300000	0.931	0.9058	0.9256	0.9589	0.9714	va_S
Chr11	300000	350000	0.8685	0.8729	0.9604	0.9731	1	va_S
Chr11	350000	400000	0.9045	0.9078	0.9637	0.982	0.999	va_S
Chr11	400000	450000	0.9863	0.941	0.9888	0.98	1	Conserved
Chr11	450000	500000	0.9894	0.9528	0.985	0.9809	0.9943	Conserved
Chr11	500000	550000	0.9776	0.9765	0.9684	0.9504	0.9668	Conserved
Chr11	550000	600000	0.9713	0.9848	0.9794	0.9823	0.8851	Conserved
Chr11	600000	650000	0.9728	0.9775	0.972	0.9757	0.9765	Conserved
Chr11	650000	700000	0.9004	0.9857	0.9839	0.9814	0.9986	Conserved
Chr11	700000	750000	0.9431	0.9335	0.9564	0.9626	0.9973	va_S
Chr11	750000	800000	0.9221	0.8	0.9335	0.9066	1	va_E
Chr11	800000	850000	0.6918	0.8809	0.7832	0.6967	0.8229	va_N
Chr11	850000	900000	0.9786	0.9626	0.9628	0.9838	0.9356	va_S
Chr11	900000	950000	0.9809	0.9667	0.9652	0.9864	0.9864	va_S
Chr11	950000	1000000	0.9376	0.8727	0.9644	0.9693	0.9975	Conserved
Chr11	1000000	1050000	0.8628	0.8857	0.8726	0.8743	0.9957	va_N
Chr11	1050000	1100000	0.9654	0.9683	0.9043	0.9519	0.6426	Conserved
Chr11	1100000	1150000	0.9781	0.975	0.974	0.9756	0.9287	Conserved
Chr11	1150000	1200000	0.9712	0.9905	0.9813	0.979	0.8827	va_N
Chr11	1200000	1250000	0.9904	0.9922	0.9394	0.9885	0.9983	Conserved
Chr11	1250000	1300000	0.9403	0.5308	0.9326	0.9486	0.9973	va_S
Chr11	1300000	1350000	0.9356	0.5161	0.9617	0	1	va_E
Chr11	1350000	1400000	0.9356	0.5965	0.665	0.1563	0.9733	va_W
Chr11	1400000	1450000	0.9881	0.9616	0.8412	0.8769	0.9832	va_W
Chr11	1450000	1500000	0.9861	0.9908	0.9849	0.9854	0.9863	Conserved
Chr11	1500000	1550000	0.9957	0.9955	0.9919	0.9894	1	Conserved
Chr11	1550000	1600000	0.9776	0.9824	0.9811	0.5445	0.9716	Conserved
Chr11	1600000	1650000	0.9893	0.9839	0.9819	0.7591	0.8576	va_W
Chr11	1650000	1700000	0.9715	0.9916	0.9759	0.9873	0.9867	Conserved
Chr11	1700000	1750000	0.9304	0.9236	0.9702	0.9839	1	va_S
Chr11	1750000	1800000	0.9868	0.9768	0.9873	0.9364	0.9971	Conserved
Chr11	1800000	1850000	0.9907	0.9912	0.9827	0.928	0.9905	Conserved
Chr11	1850000	1900000	0.9876	0.9867	0.9654	0.9817	1	Conserved
Chr11	1900000	1950000	0.9874	0.9491	0.9867	0.9471	1	Conserved
Chr11	1950000	2000000	0.985	0.9825	0.96	0.982	0.9974	Conserved
Chr11	2000000	2050000	0.9835	0.7651	0.941	0.6739	0.932	va_W
Chr11	2050000	2100000	0.9803	0.9734	0.9832	0.9305	0.9947	Conserved
Chr11	2100000	2150000	0.9757	0.8137	0.976	0.9715	0.9666	Conserved
Chr11	2150000	2200000	0.9635	0.9755	0.917	0.9415	0.9814	va_N
Chr11	2200000	2250000	0.9741	0.9885	0.9014	0.9763	1	va_N
Chr11	2250000	2300000	0.9662	0.9748	0.9242	0.9643	0.9879	va_N
Chr11	2300000	2350000	0.958	0.9896	0.9851	0.981	0.9899	Conserved
Chr11	2350000	2400000	0.9728	0.9475	0.9778	0.9861	0.9959	va_S
Chr11	2400000	2450000	0.8429	0.9592	0.9796	0.9169	0.9606	va_E
Chr11	2450000	2500000	0.943	0.9035	0.8758	0.8727	0.9955	va_W
Chr11	2500000	2550000	0.9794	0.9878	0.9665	0.9649	0.9983	va_N
Chr11	2550000	2600000	0.9766	0.9534	0.9787	0.9817	0.9912	Conserved
Chr11	2600000	2650000	0.9807	0.947	0.9886	0.9811	1	va_E
Chr11	2650000	2700000	0.9013	0.9539	0.9824	0.9536	0.9836	va_E
Chr11	2700000	2750000	0.71	0.9808	0.9267	0.9426	0.974	va_N
Chr11	2750000	2800000	0.8967	0.9777	0.9139	0.9806	1	Conserved
Chr11	2800000	2850000	0.9725	0.9841	0.9689	0.9834	0.9862	Conserved
Chr11	2850000	2900000	0.9271	0.9882	0.9775	0.9823	1	va_N
Chr11	2900000	2950000	0.9343	0.9392	0.9414	0.9419	0.8264	Conserved
Chr11	2950000	3000000	0.9778	0.9861	0.9897	0.9597	0.9664	Conserved
Chr11	3000000	3050000	0.9243	0.9817	0.8288	0.842	0.962	va_N
Chr11	3050000	3100000	0.9498	0.9005	0.9026	0.8992	0.9682	va_W
Chr11	3100000	3150000	0.771	0.7877	0.9835	0.9793	0.9958	Conserved
Chr11	3150000	3200000	0.8897	0.9811	0.9821	0.9258	0.9754	Conserved
Chr11	3200000	3250000	0.9494	0.9567	0.9824	0.9622	0.9871	va_E
Chr11	3250000	3300000	0.9622	0.9725	0.9758	0.9577	0.9899	Conserved
Chr11	3300000	3350000	0.9773	0.9761	0.9778	0.9836	0.9711	va_S
Chr11	3350000	3400000	0.8551	0.9765	0.9641	0.981	0.9854	Conserved
Chr11	3400000	3450000	0.955	0.9725	0.9355	0.9902	0.9705	va_S
Chr11	3450000	3500000	0.9567	0.9793	0.9685	0.9831	0.9919	Conserved
Chr11	3500000	3550000	0.973	0.9666	0.9481	0.9857	0.9527	va_S
Chr11	3550000	3600000	0.9692	0.9376	0.9387	0.977	0.9248	va_S
Chr11	3600000	3650000	0.9734	0.955	0.9591	0.9439	0.9844	va_W
Chr11	3650000	3700000	0.9462	0.8816	0.9748	0.8599	1	va_E
Chr11	3700000	3750000	0.7652	0.7817	0.9078	0.8755	0.9887	va_E
Chr11	3750000	3800000	0.9488	0.9769	0.9649	0.9625	0.9956	va_N
Chr11	3800000	3850000	0.9273	0.9776	0.9764	0.9761	0.9979	Conserved
Chr11	3850000	3900000	0.9152	0.9764	0.9869	0.9774	0.9957	va_E
Chr11	3900000	3950000	0.9853	0.973	0.9622	0.8167	0.9758	va_W
Chr11	3950000	4000000	0.9763	0.983	0.9883	0.9821	0.8945	va_E
Chr11	4000000	4050000	0.9622	0.9856	0.9893	0.9771	0.9953	Conserved
Chr11	4050000	4100000	0.9391	0.9765	0.9575	0.9821	0.9992	va_S
Chr11	4100000	4150000	0.9707	0.9777	0.9665	0.9735	0.9138	Conserved
Chr11	4150000	4200000	0.97	0.9629	0.9903	0.9647	0.9898	va_E
Chr11	4200000	4250000	0.9333	0.9567	0.9266	0.9705	0.9984	va_S
Chr11	4250000	4300000	0.9039	0.945	0.8472	0.9796	1	va_S
Chr11	4300000	4350000	0.9541	0.9862	0.9698	0.9789	0.921	va_N
Chr11	4350000	4400000	0.979	0.9929	0.9804	0.9761	0.998	va_N
Chr11	4400000	4450000	0.9749	0.9838	0.9857	0.9839	0.9931	Conserved
Chr11	4450000	4500000	0.9306	0.9544	0.9523	0.9415	0.9863	Conserved
Chr11	4500000	4550000	0.9533	0.9652	0.9818	0.9567	0.9828	va_E
Chr11	4550000	4600000	0.7823	0.7498	0.9947	0.7893	1	va_E
Chr11	4600000	4650000	0.7342	0.7185	0.9959	0.6786	1	va_E
Chr11	4650000	4700000	0.9415	0.9397	0.9986	0.841	1	va_E
Chr11	4700000	4750000	0.5389	0.6139	0.9872	0.9825	0.9988	Conserved
Chr11	4750000	4800000	0.9688	0.9188	0.9441	0.9599	1	va_W
Chr11	4800000	4850000	0.9569	0.9712	0.9441	0.9311	1	va_N
Chr11	4850000	4900000	0.8011	0.9402	0.9531	0.9351	0.9266	va_E
Chr11	4900000	4950000	0.7938	0.8586	0.8477	0.8796	1	va_S
Chr11	4950000	5000000	0.9528	0.9135	0.9141	0.9211	0.9842	va_W
Chr11	5000000	5050000	0.9513	0.9758	0.9488	0.8017	0.9538	va_N
Chr11	5050000	5100000	0.9201	0.9808	0.9527	0.8581	0.9851	va_N
Chr11	5100000	5150000	0.9686	0.9735	0.882	0.9439	0.9536	Conserved
Chr11	5150000	5200000	0.9639	0.9643	0.966	0.9617	0.9706	Conserved
Chr11	5200000	5250000	0.7119	0.8512	0.9233	0.9175	0.8877	va_E
Chr11	5250000	5300000	0.9736	0.971	0.9285	0.9282	0.9632	Conserved
Chr11	5300000	5350000	0.9726	0.8646	0.8859	0.9804	0.9606	va_S
Chr11	5350000	5400000	0.9066	0.7959	0.8146	0.5284	0.9981	va_W
Chr11	5400000	5450000	0.8204	0.8958	0.976	0.5785	0.9689	va_E
Chr11	5450000	5500000	0.8572	0.7502	0.7298	0.9816	0.9035	va_S
Chr11	5500000	5550000	0.7941	0.7579	0.9025	0.8697	0.9977	va_E
Chr11	5550000	5600000	0.9036	0.8773	0.9228	0.9619	0.9952	va_S
Chr11	5600000	5650000	0.8599	0.956	0.9487	0.8307	0.9367	va_N
Chr11	5650000	5700000	0.8322	0.9043	0.5029	0.9279	0.8354	va_S
Chr11	5700000	5750000	0.9675	0.8949	0.9616	0.9152	0.2864	va_W
Chr11	5750000	5800000	0.8599	0	0.9564	0	0.7786	va_E
Chr11	5800000	5850000	0.9451	0	0	0	0.088	Specific
Chr11	5850000	5900000	0.9183	0.9566	0	0.9674	0.2128	va_S
Chr11	5900000	5950000	0	0.8105	0	0	0.6224	Specific
Chr11	5950000	6000000	0	0.956	0	0	0.0918	Specific
Chr11	6000000	6050000	0.2955	0.8472	0	0	0.9069	Specific
Chr11	6050000	6100000	0.1736	0.7727	0	0	1	Specific
Chr11	6100000	6150000	0.1736	0	0	0	0.8833	Specific
Chr11	6150000	6200000	0	0.7699	0	0	0.6379	Specific
Chr11	6200000	6250000	0	0.9942	0	0	0.5802	va_N
Chr11	6250000	6300000	0	0.9943	0	0	0.9949	va_N
Chr11	6300000	6350000	0	0.9955	0	0.8898	0.997	va_N
Chr11	6350000	6400000	0	0.9954	0	0.948	1	va_N
Chr11	6400000	6450000	0	0.9948	0	0.9721	0.9965	va_N
Chr11	6450000	6500000	0	0.9979	0	0.9545	0.9359	va_N
Chr11	6500000	6550000	0	0.9384	0.916	0	0.4154	va_N
Chr11	6550000	6600000	0	0.9265	0.7843	0	0.859	va_N
Chr11	6600000	6650000	0.7837	0.9812	0.7752	0.9734	0.7399	va_N
Chr11	6650000	6700000	0.9651	0.9761	0.9224	0.8005	0.9755	va_N
Chr11	6700000	6750000	0.8129	0.8447	0.8521	0.6674	0.996	va_E
Chr11	6750000	6800000	0.8502	0.8823	0.8975	0.8839	0.9958	va_E
Chr11	6800000	6850000	0.9636	0.9799	0.9717	0.9569	0.9865	va_N
Chr11	6850000	6900000	0.7215	0.8635	0.9338	0.9391	0.9987	va_S
Chr11	6900000	6950000	0.7458	0.7135	0.9191	0.9401	0.9961	va_S
Chr11	6950000	7000000	0.752	0.8358	0.8559	0.8893	0.9985	va_S
Chr11	7000000	7050000	0.4334	0.4613	0.6765	0.8076	0.816	Specific
Chr11	7050000	7100000	0.946	0.6768	0.9599	0.9632	0.8532	Conserved
Chr11	7100000	7150000	0.9243	0.9614	0.9622	0.9526	0.4323	Conserved
Chr11	7150000	7200000	0.8752	0.9624	0.9391	0.9618	0.9986	Conserved
Chr11	7200000	7250000	0.8241	0.9854	0.9819	0.8844	0.9963	Conserved
Chr11	7250000	7300000	0.9043	0.9805	0.9832	0.904	0.9875	Conserved
Chr11	7300000	7350000	0.9418	0.9373	0.9297	0.9742	0.9948	va_S
Chr11	7350000	7400000	0.9786	0.9382	0.9253	0.9592	0.9972	va_W
Chr11	7400000	7450000	0.9269	0.9585	0.9725	0.5469	0.9621	va_E
Chr11	7450000	7500000	0.8454	0.9791	0.947	0.9469	0.9101	va_N
Chr11	7500000	7550000	0.985	0.8635	0.9739	0.873	0.9936	va_W
Chr11	7550000	7600000	0.8932	0.9817	0.9885	0.9744	0.9556	va_E
Chr11	7600000	7650000	0.8671	0.9045	0.6943	0.8544	0.9995	va_N
Chr11	7650000	7700000	0.8904	0.888	0.6775	0.8577	1	Conserved
Chr11	7700000	7750000	0.6995	0.6358	0.6775	0.6769	1	Specific
Chr11	7750000	7800000	0.9894	0.7893	0.6775	0.7103	1	va_W
Chr11	7800000	7850000	0.9967	0.5663	0.6775	0.5795	1	va_W
Chr11	7850000	7900000	0	0	0.6775	0	1	Specific
Chr11	7900000	7950000	0.9791	0.9776	0.8127	0.9774	0.9972	Conserved
Chr11	7950000	8000000	0.9681	0.9762	0.933	0.9119	0.9425	va_N
Chr11	8000000	8050000	0.9788	0.9823	0.8957	0.8943	0.9737	Conserved
Chr11	8050000	8100000	0.9875	0.9816	0.982	0.9821	1	va_W
Chr11	8100000	8150000	0.9927	0.9592	0.9666	0.9658	0.9955	va_W
Chr11	8150000	8200000	0.9959	0.8015	0.9014	0.983	1	va_W
Chr11	8200000	8250000	0.9952	0.6344	0.9123	0.8162	0.9982	va_W
Chr11	8250000	8300000	0.9974	0.8107	0.8607	0.7105	1	va_W
Chr11	8300000	8350000	0.995	0.7926	0.7728	0.8537	0.9924	va_W
Chr11	8350000	8400000	0.9994	0.8114	0.8055	0.9772	1	va_W
Chr11	8400000	8450000	0.9994	0.9777	0.9718	0.9709	1	va_W
Chr11	8450000	8500000	0.9898	0.9355	0.9467	0.9501	0.9976	va_W
Chr11	8500000	8550000	0.9603	0.9484	0.8475	0.9157	1	va_W
Chr11	8550000	8600000	0.9628	0.9692	0.9644	0.9823	1	va_S
Chr11	8600000	8650000	0.9703	0.8913	0.9526	0.9839	0.8838	va_S
Chr11	8650000	8700000	0.5298	0.8427	0.6605	0.7714	0.9801	Specific
Chr11	8700000	8750000	0.8185	0.8427	0.8694	0.8426	1	va_E
Chr11	8750000	8800000	0.8819	0.8427	0.6167	0.7121	1	va_W
Chr11	8800000	8850000	0.8657	0.8463	0.9323	0.9103	0.9729	va_E
Chr11	8850000	8900000	0.9197	0.9895	0.9836	0.9627	1	va_N
Chr11	8900000	8950000	0.9735	0.9895	0.9836	0.9009	1	va_N
Chr11	8950000	9000000	0.9752	0.9887	0.9854	0.9358	0.9668	Conserved
Chr11	9000000	9050000	0.8755	0.9942	0.9942	0.9647	1	Conserved
Chr11	9050000	9100000	0.9251	0.9994	0.9994	0.9524	0.9989	Conserved
Chr11	9100000	9150000	0.9586	0.9994	0.9994	0.9674	1	Conserved
Chr11	9150000	9200000	0.9184	0.9941	0.994	0.8429	0.9963	Conserved
Chr11	9200000	9250000	0.7564	0.9934	0.9933	0.6894	0.9921	Conserved
Chr11	9250000	9300000	0.658	0.9793	0.9586	0.7664	1	va_N
Chr11	9300000	9350000	0.6457	0.6685	0.6685	0.5809	0.9939	Specific
Chr11	9350000	9400000	0.8078	0.9232	0.9021	0.8766	0.9978	va_N
Chr11	9400000	9450000	0.9667	0.9764	0.9516	0.8823	1	va_N
Chr11	9450000	9500000	0.9742	0.9764	0.8309	0.802	1	Conserved
Chr11	9500000	9550000	0.9395	0.9794	0.9274	0.9687	0.9984	va_N
Chr11	9550000	9600000	0.8977	0.9803	0.8859	0.9549	0.9687	va_N
Chr11	9600000	9650000	0.9409	0.9408	0.9921	0.9774	0.8876	va_E
Chr11	9650000	9700000	0.9665	0.9555	0.9852	0.9603	0.9658	va_E
Chr11	9700000	9750000	0.9833	0.9012	0.855	0.8103	0.999	va_W
Chr11	9750000	9800000	0.9895	0.8008	0.6815	0.5534	1	va_W
Chr11	9800000	9850000	0.9915	0.9369	0.9707	0.8017	1	va_W
Chr11	9850000	9900000	0.5145	0.7353	0.9707	0.6298	1	va_E
Chr11	9900000	9950000	0.7515	0.8913	0.9707	0.7804	1	va_E
Chr11	9950000	10000000	0.9615	0.8551	0.8543	0.9569	0.9961	Conserved
Chr11	10000000	10050000	0.7383	0.7383	0.9526	0.7665	0.9633	va_E
Chr11	10050000	10100000	0.9801	0.9703	0.9583	0.7933	1	va_W
Chr11	10100000	10150000	0.9822	0.9544	0.9583	0.7737	1	va_W
Chr11	10150000	10200000	0.9761	0.9551	0.9583	0	1	va_W
Chr11	10200000	10250000	0.9708	0.9551	0.9583	0.8612	1	va_W
Chr11	10250000	10300000	0.5897	0.9692	0.9583	0.6536	1	va_N
Chr11	10300000	10350000	0.9771	0	0.9754	0.9458	1	Conserved
Chr11	10350000	10400000	0	0.902	0.9989	0	1	va_E
Chr11	10400000	10450000	0	0.9595	0.9989	0	1	va_E
Chr11	10450000	10500000	0	0.7744	0.9989	0	1	va_E
Chr11	10500000	10550000	0.9682	0.7735	0.9989	0.9816	1	va_E
Chr11	10550000	10600000	0.9554	0.9047	0.9637	0.9384	0.8674	va_E
Chr11	10600000	10650000	0.8773	0.918	0.8775	0.969	0.987	va_S
Chr11	10650000	10700000	0.5936	0.57	0.5937	0.6389	1	Specific
Chr11	10700000	10750000	0.9201	0.8606	0.9201	0.7185	0.973	Conserved
Chr11	10750000	10800000	0.9885	0.9607	0.9885	0.9137	0.9985	Conserved
Chr11	10800000	10850000	0.9759	0.9547	0.9759	0.8914	0.9877	Conserved
Chr11	10850000	10900000	0.8379	0.8625	0.8379	0.9695	1	va_S
Chr11	10900000	10950000	0.9483	0.8894	0.9505	0.9229	0.9671	Conserved
Chr11	10950000	11000000	0.9704	0.9681	0.7899	0.6903	0.998	Conserved
Chr11	11000000	11050000	0.856	0.8609	0.7884	0.7811	0.8534	Conserved
Chr11	11050000	11100000	0.9782	0.9552	0.9659	0.9394	0.8791	va_W
Chr11	11100000	11150000	0.9158	0.9171	0.9528	0.9646	0.9921	va_S
Chr11	11150000	11200000	0.908	0.9508	0.9221	0.957	0.8055	va_S
Chr11	11200000	11250000	0.746	0.9903	0.746	0.8869	0.9705	va_N
Chr11	11250000	11300000	0.9844	0.9896	0.9846	0.8923	0.7965	va_N
Chr11	11300000	11350000	0.7576	0.7895	0.7571	0.9838	0.5994	va_S
Chr11	11350000	11400000	0.9451	0.8739	0.9451	0.9486	0.9491	Conserved
Chr11	11400000	11450000	0.9648	0.8691	0.9648	0.9236	1	Conserved
Chr11	11450000	11500000	0.8104	0.9074	0.9476	0.8556	1	va_E
Chr11	11500000	11550000	0.8342	0.9713	0.6798	0.6405	0.9982	va_N
Chr11	11550000	11600000	0.8218	0.8684	0.8829	0.924	0.9655	va_S
Chr11	11600000	11650000	0.8759	0.5069	0.8111	0.6923	0.9174	va_W
Chr11	11650000	11700000	0.3321	0.5974	0.4069	0.6084	1	Specific
Chr11	11700000	11750000	0.5389	0.7449	0.6341	0.753	1	Specific
Chr11	11750000	11800000	0.7818	0.9823	0.8426	0.8498	0.9922	va_N
Chr11	11800000	11850000	0.994	0.8592	0.944	0.9487	0.9972	va_W
Chr11	11850000	11900000	0.9042	0.6925	0.9453	0.9482	1	Conserved
Chr11	11900000	11950000	0.8866	0.8902	0.925	0.9287	0.2839	Conserved
Chr11	11950000	12000000	0.8564	0.8624	0.8736	0.8294	1	va_E
Chr11	12000000	12050000	0.8549	0.7023	0.6871	0.6435	1	va_W
Chr11	12050000	12100000	0.8085	0.8279	0.5339	0.7283	1	Specific
Chr11	12100000	12150000	0.8372	0.8099	0.4423	0.7361	0.8458	Specific
Chr11	12150000	12200000	0.9607	0.9539	0	0	0.1556	Specific
Chr11	12200000	12250000	0	0.6944	0.9912	0	0.3779	va_E
Chr11	12250000	12300000	0.5872	0.5986	0.583	0.5819	0.9099	Specific
Chr11	12300000	12350000	0.6174	0.5734	0.7293	0.5774	1	Specific
Chr11	12350000	12400000	0.7105	0.59	0.7259	0.7458	0.9969	Specific
Chr11	12400000	12450000	0.9602	0.8175	0.9645	0.8778	0.9229	Conserved
Chr11	12450000	12500000	0.9843	0.9922	0.9613	0.7606	1	va_N
Chr11	12500000	12550000	0.9974	0.997	0.9802	0.7606	1	Conserved
Chr11	12550000	12600000	0.9974	0.9941	0.6593	0.8382	1	Conserved
Chr11	12600000	12650000	0.9978	0.9974	0.8284	0.9141	1	Conserved
Chr11	12650000	12700000	0.8791	0.8897	0.8423	0.8965	1	va_S
Chr11	12700000	12750000	0.8583	0.8531	0.9594	0.8997	1	va_E
Chr11	12750000	12800000	0.8259	0.8308	0.789	0.869	1	va_S
Chr11	12800000	12850000	0.9134	0.9134	0.7727	0.9055	0.9378	Conserved
Chr11	12850000	12900000	0.8384	0.8505	0.9034	0.9296	1	va_S
Chr11	12900000	12950000	0.8314	0.8441	0.9034	0.9296	1	va_S
Chr11	12950000	13000000	0.953	0.9558	0.856	0.9728	0.9866	va_S
Chr11	13000000	13050000	0.8433	0.8433	0.7663	0.7737	1	Specific
Chr11	13050000	13100000	0.9308	0.9267	0.7926	0.9187	0.5853	Conserved
Chr11	13100000	13150000	0.9654	0.9595	0.8425	0.9134	0.7296	va_W
Chr11	13150000	13200000	0.8886	0.955	0.8019	0.7871	0.9972	va_N
Chr11	13200000	13250000	0.6791	0.6207	0.6668	0.8544	0.9981	va_S
Chr11	13250000	13300000	0.7347	0.6698	0.6544	0.8466	1	Specific
Chr11	13300000	13350000	0.7452	0.7917	0.9122	0.9344	0.9939	va_S
Chr11	13350000	13400000	0.9182	0.8814	0.9469	0.9425	0.9564	Conserved
Chr11	13400000	13450000	0.9374	0.9547	0.9427	0.9351	1	va_N
Chr11	13450000	13500000	0.932	0.9331	0.9015	0.9536	0.7118	va_S
Chr11	13500000	13550000	0.9195	0.9701	0.9681	0.8827	0.9995	Conserved
Chr11	13550000	13600000	0.8997	0.8589	0.9565	0.912	1	va_E
Chr11	13600000	13650000	0.8882	0.805	0.8276	0.8153	1	va_W
Chr11	13650000	13700000	0.967	0.9346	0.9673	0.8815	1	Conserved
Chr11	13700000	13750000	0.9453	0.9639	0.9881	0.9765	1	va_E
Chr11	13750000	13800000	0.8539	0.8992	0.8785	0.958	1	va_S
Chr11	13800000	13850000	0.5986	0.7373	0.54	0.6366	1	Specific
Chr11	13850000	13900000	0.616	0.6858	0.7528	0.6727	1	Specific
Chr11	13900000	13950000	0.9167	0.8514	0.8754	0.8423	1	va_W
Chr11	13950000	14000000	0.9717	0.9542	0.9015	0.9017	1	va_W
Chr11	14000000	14050000	0.989	0.997	0.9482	0.9925	1	Conserved
Chr11	14050000	14100000	0.9301	0.9777	0.8231	0.7735	1	va_N
Chr11	14100000	14150000	0.9174	0.8369	0.7136	0.791	1	va_W
Chr11	14150000	14200000	0.8009	0.4613	0.3427	0.8369	1	Specific
Chr11	14200000	14250000	0.8022	0.4952	0.437	0.8551	0.999	va_S
Chr11	14250000	14300000	0.9016	0.9349	0.9082	0.8602	0.988	va_N
Chr11	14300000	14350000	0.9044	0.9953	0.9045	0.8633	1	va_N
Chr11	14350000	14400000	0.9231	0.9544	0.9248	0.8908	1	va_N
Chr11	14400000	14450000	0.9716	0.9834	0.9831	0.8853	0.8595	Conserved
Chr11	14450000	14500000	0.9277	0.9839	0.9277	0.9502	0.9966	va_N
Chr11	14500000	14550000	0.79	0.8076	0.8248	0.7724	0.9954	Specific
Chr11	14550000	14600000	0.61	0.6665	0.6101	0.6549	1	Specific
Chr11	14600000	14650000	0.61	0.6912	0.6241	0.6549	1	Specific
Chr11	14650000	14700000	0.7148	0.395	0.7137	0.6345	1	Specific
Chr11	14700000	14750000	0.8345	0.7567	0.8481	0.7979	1	Specific
Chr11	14750000	14800000	0.9025	0.9708	0.9038	0.7587	1	va_N
Chr11	14800000	14850000	0.9737	0.8134	0.9743	0.9139	1	Conserved
Chr11	14850000	14900000	0.9765	0.8074	0.976	0.8542	0.2731	Conserved
Chr11	14900000	14950000	0.9458	0.9965	0.9951	0.7192	0.7897	Conserved
Chr11	14950000	15000000	0.8616	0.2649	0.9395	0.7693	0.5916	va_E
Chr11	15000000	15050000	0.6603	0.2649	0.9066	0.7724	1	va_E
Chr11	15050000	15100000	0.8243	0.8004	0.8507	0.8801	1	va_S
Chr11	15100000	15150000	0.952	0.8051	0.828	0.9078	1	va_W
Chr11	15150000	15200000	0.9795	0.8078	0.7983	0.9078	1	va_W
Chr11	15200000	15250000	0.9509	0.8031	0.7408	0.9077	1	va_W
Chr11	15250000	15300000	0.5732	0.9222	0.6738	0.8792	1	va_N
Chr11	15300000	15350000	0.974	0.929	0.9221	0.9506	0.9472	va_W
Chr11	15350000	15400000	0.6577	0.6578	0.7572	0.8339	1	Specific
Chr11	15400000	15450000	0.8079	0.6222	0.8912	0.8339	1	va_E
Chr11	15450000	15500000	0.9278	0.6991	0.8146	0.7947	0.9387	va_W
Chr11	15500000	15550000	0.8596	0.812	0.819	0.8742	1	va_S
Chr11	15550000	15600000	0.8658	0.8239	0.8221	0.8873	1	va_S
Chr11	15600000	15650000	0.8939	0.8361	0.9068	0.9148	0.988	va_S
Chr11	15650000	15700000	0.7219	0.5979	0.767	0.806	0.9889	Specific
Chr11	15700000	15750000	0.9327	0.3832	0.6844	0.5005	1	va_W
Chr11	15750000	15800000	0.9428	0.4689	0.7388	0.5384	1	va_W
Chr11	15800000	15850000	0.958	0.8399	0.8815	0.7633	0.9953	va_W
Chr11	15850000	15900000	0.9694	0.9033	0.9588	0.9218	1	va_W
Chr11	15900000	15950000	0.9087	0.8524	0.6492	0.8964	0.9987	va_W
Chr11	15950000	16000000	0.8578	0.8467	0.569	0.9198	0.8663	va_S
Chr11	16000000	16050000	0.7766	0.8722	0.5899	0.6211	0.8337	va_N
Chr11	16050000	16100000	0.5722	0	0.4733	0.0775	1	Specific
Chr11	16100000	16150000	0.4512	0.8753	0.4959	0.4941	0.9061	va_N
Chr11	16150000	16200000	0.9137	0.9488	0.8689	0.7919	0.91	va_N
Chr11	16200000	16250000	0.964	0.7744	0.7942	0.8649	0.6311	va_W
Chr11	16250000	16300000	0.9392	0.4548	0.4553	0.7854	1	va_W
Chr11	16300000	16350000	0.8376	0.8219	0.822	0.9043	0.977	va_S
Chr11	16350000	16400000	0.8205	0.9518	0.8215	0.7634	0.9104	va_N
Chr11	16400000	16450000	0.9153	0.8966	0.9155	0.9299	1	va_S
Chr11	16450000	16500000	0.9232	0.9612	0.9234	0.9579	0.9981	Conserved
Chr11	16500000	16550000	0.9953	0.8934	0.9952	0.7429	1	Conserved
Chr11	16550000	16600000	0.9953	0.8394	0.9952	0.8664	1	Conserved
Chr11	16600000	16650000	0.7119	0.7404	0.7767	0.9436	0.9943	va_S
Chr11	16650000	16700000	0.5283	0.6459	0.6549	0.5924	1	Specific
Chr11	16700000	16750000	0.7908	0.9819	0.7908	0.8927	0.939	va_N
Chr11	16750000	16800000	0.7613	0.9802	0.7613	0.8831	0.5235	va_N
Chr11	16800000	16850000	0.9865	0.9498	0.9886	0.9685	0.817	Conserved
Chr11	16850000	16900000	0.8402	0.9225	0.8405	0.9408	1	va_S
Chr11	16900000	16950000	0.7253	0.5597	0.7253	0.4996	0.8805	Specific
Chr11	16950000	17000000	0.8055	0.8213	0.8055	0.7067	0.9689	Specific
Chr11	17000000	17050000	0.8199	0.7252	0.8193	0.7969	0.9968	Specific
Chr11	17050000	17100000	0.7655	0.6295	0.7649	0.8501	0.9943	va_S
Chr11	17100000	17150000	0.8524	0.6521	0.9642	0.7865	0.9829	va_E
Chr11	17150000	17200000	0.8817	0.8034	0.9682	0.9635	1	Conserved
Chr11	17200000	17250000	0.9718	0.9688	0.9922	0.9767	0.9838	va_E
Chr11	17250000	17300000	0.8441	0.8777	0.9816	0.8769	0.9213	va_E
Chr11	17300000	17350000	0.9608	0.7524	0.9619	0.884	0.9983	Conserved
Chr11	17350000	17400000	0.9439	0.7836	0.9313	0.9682	0.999	va_S
Chr11	17400000	17450000	0.9341	0.7981	0.9209	0.9657	1	va_S
Chr11	17450000	17500000	0.9266	0.826	0.9247	0.9658	0.9421	va_S
Chr11	17500000	17550000	0.9421	0.8228	0.9797	0.9193	0.98	va_E
Chr11	17550000	17600000	0.9165	0.6803	0.7741	0.8563	0.9915	va_W
Chr11	17600000	17650000	0.9577	0.7173	0.8769	0.9553	0.9928	Conserved
Chr11	17650000	17700000	0.9767	0.9292	0.9237	0.9689	0.7138	va_W
Chr11	17700000	17750000	0.9041	0.9088	0.8555	0.8748	1	Conserved
Chr11	17750000	17800000	0.7793	0.7822	0.776	0.8817	0.8351	va_S
Chr11	17800000	17850000	0.8626	0.8993	0.9731	0.8947	1	va_E
Chr11	17850000	17900000	0.9453	0.8422	0.9794	0.8987	1	va_E
Chr11	17900000	17950000	0.8579	0.901	0.9909	0.8143	0.7256	va_E
Chr11	17950000	18000000	0.6414	0.8732	0.9967	0.7625	1	va_E
Chr11	18000000	18050000	0.7036	0.9362	0.9967	0.8798	1	va_E
Chr11	18050000	18100000	0.9373	0.9557	0.9897	0.8329	0.8786	va_E
Chr11	18100000	18150000	0.4785	0	0.9906	0.8893	1	va_E
Chr11	18150000	18200000	0.4688	0.9481	0.9453	0.9279	1	Conserved
Chr11	18200000	18250000	0	0	0.9623	0	0.9991	va_E
Chr11	18250000	18300000	0.9562	0	0.9991	0	1	va_E
Chr11	18300000	18350000	0	0	0.9991	0	1	va_E
Chr11	18350000	18400000	0	0	0.9991	0	1	va_E
Chr11	18400000	18450000	0	0	0.9927	0	0.942	va_E
Chr11	18450000	18500000	0.9493	0.8166	0.9867	0.9686	0.9679	va_E
Chr11	18500000	18550000	0.7381	0.9269	0.9549	0.8985	0.9904	va_E
Chr11	18550000	18600000	0.9312	0.9474	0.9291	0.9838	0.995	va_S
Chr11	18600000	18650000	0.9798	0.7729	0.8677	0.4041	1	va_W
Chr11	18650000	18700000	0.6493	0.6689	0.759	0.3752	1	Specific
Chr11	18700000	18750000	0.6377	0.6423	0.7583	0.4487	1	Specific
Chr11	18750000	18800000	0	0.6599	0.9966	0.8842	0.3878	va_E
Chr11	18800000	18850000	0.8336	0.8706	0.981	0.8641	0.9761	va_E
Chr11	18850000	18900000	0.6977	0.9593	0.7083	0.9931	1	va_S
Chr11	18900000	18950000	0.8427	0.9571	0.9423	0.9546	0.9423	Conserved
Chr11	18950000	19000000	0.9578	0.8785	0.8842	0.977	0.9322	va_S
Chr11	19000000	19050000	0.8986	0.8574	0.8822	0.867	0.9225	va_W
Chr11	19050000	19100000	0.9726	0.9629	0.9907	0.8454	0.9968	va_E
Chr11	19100000	19150000	0.9761	0.9829	0.9842	0.98	0.9791	Conserved
Chr11	19150000	19200000	0.9199	0.9641	0.9788	0.955	0.9952	va_E
Chr11	19200000	19250000	0.9224	0.988	0.8997	0.9804	0.9909	va_N
Chr11	19250000	19300000	0.889	0.954	0.9373	0.9887	0.9969	va_S
Chr11	19300000	19350000	0.9503	0.9432	0.9517	0.9649	1	va_S
Chr11	19350000	19400000	0.9632	0.9867	0.9157	0.9843	0.9917	Conserved
Chr11	19400000	19450000	0.9589	0.9754	0.9488	0.9677	0.9455	va_N
Chr11	19450000	19500000	0.954	0.9798	0.9882	0.8959	0.985	va_E
Chr11	19500000	19550000	0.9457	0.9834	0.9586	0.965	0.9805	va_N
Chr11	19550000	19600000	0.9879	0.8607	0.9874	0.9754	0.9955	Conserved
Chr11	19600000	19650000	0.8895	0.9724	0.8896	0.9541	0.9888	va_N
Chr11	19650000	19700000	0.981	0.8852	0.9811	0.9709	0.9518	Conserved
Chr11	19700000	19750000	0.9633	0.9805	0.9836	0.9831	0.9868	Conserved
Chr11	19750000	19800000	0.8045	0.6779	0.9878	0.8164	1	va_E
Chr11	19800000	19850000	0.8653	0.5108	0.9211	0.6463	0.9061	va_E
Chr11	19850000	19900000	0.9577	0.9019	0.9625	0.8631	0.5783	Conserved
Chr11	19900000	19950000	0.9151	0.9148	0.9122	0.7795	0.6953	Conserved
Chr11	19950000	20000000	0.9257	0.9535	0.8942	0.8372	0.6637	va_N
Chr11	20000000	20050000	0.9568	0.9473	0.9567	0.9407	0.916	Conserved
Chr11	20050000	20100000	0.9166	0.9004	0.9166	0.9685	0.7951	va_S
Chr11	20100000	20150000	0.9579	0.9528	0.9584	0.6394	1	Conserved
Chr11	20150000	20200000	0.855	0.8749	0.7866	0.5895	1	va_N
Chr11	20200000	20250000	0.8987	0.8435	0.9334	0.8582	1	va_E
Chr11	20250000	20300000	0.8684	0.7426	0.8685	0.8582	1	Conserved
Chr11	20300000	20350000	0.7925	0.822	0.8911	0.8821	0.9714	va_E
Chr11	20350000	20400000	0.774	0.8932	0.9191	0.8568	1	va_E
Chr11	20400000	20450000	0.774	0.8252	0.8252	0.7017	1	Specific
Chr11	20450000	20500000	0.8943	0.9178	0.9175	0.8593	0.9964	Conserved
Chr11	20500000	20550000	0.9358	0.7532	0.9874	0.9684	0.975	va_E
Chr11	20550000	20600000	0.7374	0.8409	0.907	0.7677	0.9527	va_E
Chr11	20600000	20650000	0.9162	0.9235	0.959	0.951	0.7844	va_E
Chr11	20650000	20700000	0.8612	0.936	0.9584	0.9414	1	va_E
Chr11	20700000	20750000	0.9248	0.9825	0.881	0.9269	0.9916	va_N
Chr11	20750000	20800000	0.9399	0.9924	0.9288	0.9077	0.9995	va_N
Chr11	20800000	20850000	0.6999	0.9966	0.9838	0.9542	0.7662	va_N
Chr11	20850000	20900000	0.6531	0.9965	0.9255	0.9396	1	va_N
Chr11	20900000	20950000	0.8691	0.9964	0.962	0.9727	0.9963	va_N
Chr11	20950000	21000000	0.8522	0.9972	0.9976	0.994	1	Conserved
Chr11	21000000	21031730	0.9016	0.9972	0.9976	0.994	0.8989	Conserved
Chr12	0	50000	0.9795	0.9955	0.9944	0.8467	0.9992	Conserved
Chr12	50000	100000	0.94	0.9953	0.9951	0.8599	0.9979	Conserved
Chr12	100000	150000	0.9385	0.9397	0.9451	0.9367	1	va_E
Chr12	150000	200000	0.9222	0.9931	0.9935	0.886	1	Conserved
Chr12	200000	250000	0.9283	0.8918	0.8599	0.9202	0.9655	va_W
Chr12	250000	300000	0.8721	0.9049	0.8789	0.8304	0.9627	va_N
Chr12	300000	350000	0.9374	0.9464	0.9882	0.9477	0.9631	va_E
Chr12	350000	400000	0.938	0.9768	0.9705	0.8541	0.9819	va_N
Chr12	400000	450000	0.9721	0.9668	0.9753	0.9595	0.9967	Conserved
Chr12	450000	500000	0.6884	0.9833	0.9966	0.8576	0.94	va_E
Chr12	500000	550000	0.8958	0.9911	0.9985	0.91	1	va_E
Chr12	550000	600000	0.8792	0.9975	0.9985	0.9738	1	Conserved
Chr12	600000	650000	0.9808	0.9975	0.9985	0.896	1	Conserved
Chr12	650000	700000	0.9441	0.9867	0.9867	0.9627	0.9862	Conserved
Chr12	700000	750000	0.9852	0.9935	0.9947	0.9371	1	Conserved
Chr12	750000	800000	0.9852	0.9962	0.9976	0.8087	1	Conserved
Chr12	800000	850000	0.9852	0.9929	0.9955	0.9671	1	Conserved
Chr12	850000	900000	0.9852	0.8668	0.989	0.9709	0.9985	Conserved
Chr12	900000	950000	0.9221	0.9113	0.9221	0.9814	0.9974	va_S
Chr12	950000	1000000	0.8955	0.8824	0.8955	0.994	1	va_S
Chr12	1000000	1050000	0.9476	0.9567	0.9476	0.9666	0.9902	va_S
Chr12	1050000	1100000	0.9916	0.7376	0.9916	0.7452	0.9881	Conserved
Chr12	1100000	1150000	0.9154	0.8825	0.974	0.915	0.9864	va_E
Chr12	1150000	1200000	0.8639	0.9232	0.9705	0.8439	0.9257	va_E
Chr12	1200000	1250000	0.9041	0.9027	0.9027	0.7695	1	Conserved
Chr12	1250000	1300000	0.9424	0.9451	0.9451	0.8653	0.9758	Conserved
Chr12	1300000	1350000	0.8489	0.8485	0.8485	0.8937	0.7158	va_S
Chr12	1350000	1400000	0.9743	0.9688	0.969	0.9525	0.8721	va_W
Chr12	1400000	1450000	0.8551	0.855	0.8551	0.9521	0.8987	va_S
Chr12	1450000	1500000	0.9991	0.9991	0.9991	0.8411	1	Conserved
Chr12	1500000	1550000	0.9991	0.9991	0.9991	0.9905	1	Conserved
Chr12	1550000	1600000	0.9991	0.9991	0.9991	0.9439	1	Conserved
Chr12	1600000	1650000	0.9991	0.9991	0.9991	0.866	1	Conserved
Chr12	1650000	1700000	0.9991	0.9991	0.9991	0.9238	1	Conserved
Chr12	1700000	1750000	0.9991	0.9991	0.9991	0.9068	1	Conserved
Chr12	1750000	1800000	0.9956	0.9954	0.9956	0.8227	0.9879	Conserved
Chr12	1800000	1850000	0.9968	0.9968	0.9971	0.9065	0.9556	Conserved
Chr12	1850000	1900000	0.9952	0.9953	0.9954	0.8959	0.9993	Conserved
Chr12	1900000	1950000	0.9853	0.9853	0.9853	0.8221	0.9587	Conserved
Chr12	1950000	2000000	0.9819	0.918	0.9818	0.9316	0.9257	Conserved
Chr12	2000000	2050000	0.8201	0.8196	0.8201	0.7521	0.9872	Specific
Chr12	2050000	2100000	0.9111	0.9294	0.9189	0.8648	0.785	va_N
Chr12	2100000	2150000	0.9579	0.9646	0.9624	0.9784	0.6974	va_S
Chr12	2150000	2200000	0.9882	0.9687	0.9882	0.9745	0.9869	Conserved
Chr12	2200000	2250000	0.9904	0.9743	0.9902	0.9291	0.9723	Conserved
Chr12	2250000	2300000	0.7965	0.6596	0.9307	0.822	0.8984	va_E
Chr12	2300000	2350000	0.9924	0.9613	0.9217	0.9753	0.9955	va_W
Chr12	2350000	2400000	0.9806	0.9265	0.9331	0.9117	0.9988	va_W
Chr12	2400000	2450000	0.9595	0.9358	0.9519	0.9333	1	va_W
Chr12	2450000	2500000	0.9595	0.9358	0.8691	0.8873	1	va_W
Chr12	2500000	2550000	0.9595	0.9358	0.8799	0.878	1	va_W
Chr12	2550000	2600000	0.9595	0.9358	0.865	0.6678	1	va_W
Chr12	2600000	2650000	0.9679	0.9358	0.9565	0.9103	1	va_W
Chr12	2650000	2700000	0.8468	0.9358	0.6605	0.7121	1	va_N
Chr12	2700000	2750000	0.9386	0.9543	0.9741	0.9816	0.9275	va_S
Chr12	2750000	2800000	0.8082	0.9291	0.9331	0.9461	0.9781	va_S
Chr12	2800000	2850000	0.8498	0.8851	0.865	0.8464	0.8864	va_N
Chr12	2850000	2900000	0.9575	0.9671	0.9833	0.8931	1	va_E
Chr12	2900000	2950000	0.9705	0.9677	0.9772	0.9652	0.9375	va_E
Chr12	2950000	3000000	0.8651	0.8792	0.9836	0.9466	0.9986	va_E
Chr12	3000000	3050000	0.9163	0.9814	0.9805	0.9794	0.9765	Conserved
Chr12	3050000	3100000	0.9234	0.9635	0.969	0.9259	0.9138	va_E
Chr12	3100000	3150000	0.9291	0.9432	0.9531	0.9399	0.9836	va_E
Chr12	3150000	3200000	0.8671	0.9095	0.8995	0.8902	1	va_N
Chr12	3200000	3250000	0.8716	0.9535	0.8677	0.8879	0.9841	va_N
Chr12	3250000	3300000	0.9754	0.9106	0.9766	0.8489	0.9427	Conserved
Chr12	3300000	3350000	0.9859	0.9639	0.9895	0.9375	1	Conserved
Chr12	3350000	3400000	0.9876	0.9584	0.9896	0.9468	0.9988	Conserved
Chr12	3400000	3450000	0.955	0.8684	0.9583	0.9249	1	Conserved
Chr12	3450000	3500000	0	0.6927	0	0.8896	0.9499	va_S
Chr12	3500000	3550000	0.9031	0.9665	0.9794	0.1941	1	va_E
Chr12	3550000	3600000	0.6999	0.9853	0.9937	0.1941	1	va_E
Chr12	3600000	3650000	0.6999	0.9475	0.7494	0.3587	1	va_N
Chr12	3650000	3700000	0.6999	0.9439	0.7487	0.754	1	va_N
Chr12	3700000	3750000	0.7869	0.9853	0.8206	0.8817	0.9914	va_N
Chr12	3750000	3800000	0.9452	0.9918	0.9449	0.9507	1	va_N
Chr12	3800000	3850000	0.9667	0.9772	0.9744	0.9645	0.9502	Conserved
Chr12	3850000	3900000	0.9798	0.8435	0.9804	0.9627	0.9954	Conserved
Chr12	3900000	3950000	0.9649	0.9641	0.9657	0.9763	0.9876	va_S
Chr12	3950000	4000000	0.9823	0.9927	0.9574	0.9488	0.9995	va_N
Chr12	4000000	4050000	0.9066	0.9658	0.903	0.9339	0.995	va_N
Chr12	4050000	4100000	0.8903	0.9195	0.9863	0.9789	0.9938	va_E
Chr12	4100000	4150000	0.9897	0.9896	0.9042	0.9837	0.9918	Conserved
Chr12	4150000	4200000	0.9812	0.9812	0.9792	0.9359	0.9466	Conserved
Chr12	4200000	4250000	0.9451	0.9451	0.9576	0.8969	0.9361	va_E
Chr12	4250000	4300000	0.8111	0.8109	0.8846	0.9098	1	va_S
Chr12	4300000	4350000	0.8779	0.8769	0.8887	0.6167	0.9962	va_E
Chr12	4350000	4400000	0.9836	0.9836	0.9339	0.9222	0.7401	Conserved
Chr12	4400000	4450000	0	0	0	0	0	Specific
Chr12	4450000	4500000	0.9821	0.9354	0.9738	0.9817	0.307	Conserved
Chr12	4500000	4550000	0.7989	0.9354	0.974	0.7917	0.6647	va_E
Chr12	4550000	4600000	0.8113	0.9509	0.9936	0.7615	1	va_E
Chr12	4600000	4650000	0	0	0.926	0.7978	0.9922	va_E
Chr12	4650000	4700000	0	0	0.9232	0.8041	0.5554	va_E
Chr12	4700000	4750000	0	0	0	0	0	Specific
Chr12	4750000	4800000	0	0	0.9478	0.9498	0.0153	Specific
Chr12	4800000	4850000	0	0	0.9545	0.9539	0.1787	Specific
Chr12	4850000	4900000	0	0	0.851	0	0.042	Specific
Chr12	4900000	4950000	0	0.9625	0.9699	0	0.1524	Specific
Chr12	4950000	5000000	0	0	0	0	0	Specific
Chr12	5000000	5050000	0	0	0	0	0	Specific
Chr12	5050000	5100000	0	0	0	0	0	Specific
Chr12	5100000	5150000	0	0	0	0	0	Specific
Chr12	5150000	5200000	0	0	0	0	0	Specific
Chr12	5200000	5250000	0	0	0	0	0	Specific
Chr12	5250000	5300000	0	0	0.9896	0	0.1591	Specific
Chr12	5300000	5350000	0.7929	0.9141	0.8903	0.8826	0.6233	va_N
Chr12	5350000	5400000	0.9752	0.8957	0.9829	0.9421	0.974	va_E
Chr12	5400000	5450000	0.8504	0.7072	0.8768	0.8107	0.9464	va_E
Chr12	5450000	5500000	0.6733	0.9693	0.9825	0.9768	0.8988	va_E
Chr12	5500000	5550000	0.9655	0.7955	0.8409	0.9649	0.9668	Conserved
Chr12	5550000	5600000	0.8266	0.7038	0.8191	0.795	0.898	Specific
Chr12	5600000	5650000	0.879	0.9222	0.9549	0.8315	0.3821	va_E
Chr12	5650000	5700000	0	0	0.9657	0.9281	0.0922	Specific
Chr12	5700000	5750000	0.9241	0.9475	0.97	0.9434	0.3083	va_E
Chr12	5750000	5800000	0.9538	0.9557	0.3008	0.9644	0.5875	va_S
Chr12	5800000	5850000	0.9471	0.9053	0.3066	0.9553	0.9468	va_S
Chr12	5850000	5900000	0.9475	0.9424	0.9734	0.9151	0.9311	va_E
Chr12	5900000	5950000	0.9447	0.9746	0.9636	0.7106	0.9985	va_N
Chr12	5950000	6000000	0.9221	0.9428	0.9357	0.9178	0.9888	va_N
Chr12	6000000	6050000	0.9481	0.9821	0.9806	0.9562	0.954	Conserved
Chr12	6050000	6100000	0.6898	0.9694	0.9566	0.9635	0.9944	va_N
Chr12	6100000	6150000	0.9666	0.9823	0.8789	0.9739	0.9359	va_N
Chr12	6150000	6200000	0.8996	0.9835	0.9814	0.94	0.8953	Conserved
Chr12	6200000	6250000	0.9362	0.9808	0.9749	0.9687	0.9814	va_N
Chr12	6250000	6300000	0.5853	0.6578	0.6091	0.6027	0.9605	Specific
Chr12	6300000	6350000	0.9587	0.9456	0.8888	0.9444	0.9484	va_W
Chr12	6350000	6400000	0.8372	0.8054	0.9739	0.84	0.9521	va_E
Chr12	6400000	6450000	0.9956	0.9943	0.9938	0.9478	1	Conserved
Chr12	6450000	6500000	0.9956	0.9568	0.9962	0.9308	1	Conserved
Chr12	6500000	6550000	0.9861	0.694	0.9866	0.9079	0.9976	Conserved
Chr12	6550000	6600000	0.9537	0.9083	0.9538	0.8295	1	Conserved
Chr12	6600000	6650000	0.9101	0.9046	0.959	0.8295	1	va_E
Chr12	6650000	6700000	0.8867	0.9046	0.9618	0.9239	1	va_E
Chr12	6700000	6750000	0.9761	0.9582	0.966	0.9824	0.9998	va_S
Chr12	6750000	6800000	0.9764	0.9668	0.9892	0.9849	0.8069	Conserved
Chr12	6800000	6850000	0.9921	0.9894	0.9875	0.9782	0.8695	Conserved
Chr12	6850000	6900000	0.9926	0.9838	0.9957	0.9862	1	Conserved
Chr12	6900000	6950000	0.9873	0.9743	0.978	0.9738	0.8377	va_W
Chr12	6950000	7000000	0.9791	0.9803	0.9797	0.9663	0.9989	Conserved
Chr12	7000000	7050000	0.9871	0.982	0.9793	0.971	0.9569	va_W
Chr12	7050000	7100000	0.9887	0.9924	0.9761	0.964	0.9864	Conserved
Chr12	7100000	7150000	0.993	0.9922	0.9952	0.9539	1	Conserved
Chr12	7150000	7200000	0.9568	0.956	0.9589	0.9499	0.9626	Conserved
Chr12	7200000	7250000	0.8966	0.8966	0.9186	0.8714	0.9522	va_E
Chr12	7250000	7300000	0.8915	0.8915	0.9869	0.9305	0.9846	va_E
Chr12	7300000	7350000	0.9477	0.9477	0.994	0.903	1	va_E
Chr12	7350000	7400000	0.9812	0.9812	0.6936	0.6915	0.9925	Conserved
Chr12	7400000	7450000	0.974	0.974	0.9759	0.9569	0.9422	Conserved
Chr12	7450000	7500000	0.9744	0.9733	0.9725	0.9559	0.9985	Conserved
Chr12	7500000	7550000	0.9363	0.9373	0.9362	0.9833	0.9789	va_S
Chr12	7550000	7600000	0.9848	0.9882	0.9848	0.9802	0.9941	Conserved
Chr12	7600000	7650000	0.9679	0.9807	0.9679	0.9788	0.9921	Conserved
Chr12	7650000	7700000	0.9697	0.8712	0.9697	0.9479	0.9412	Conserved
Chr12	7700000	7750000	0.9402	0.887	0.9389	0.9765	1	va_S
Chr12	7750000	7800000	0.933	0.964	0.9597	0.9435	0.9832	Conserved
Chr12	7800000	7850000	0.9315	0.9347	0.9514	0.9189	0.9964	va_E
Chr12	7850000	7900000	0.9733	0.8581	0.9486	0.9742	1	Conserved
Chr12	7900000	7950000	0.9362	0.8723	0.9662	0.973	0.968	va_S
Chr12	7950000	8000000	0.834	0.9761	0.892	0.9822	0.9983	va_S
Chr12	8000000	8050000	0.8545	0.9777	0.98	0.9858	0.9735	va_S
Chr12	8050000	8100000	0.797	0.9622	0.9042	0.9282	0.964	va_N
Chr12	8100000	8150000	0.9698	0.9591	0.8707	0.7848	0.9819	va_W
Chr12	8150000	8200000	0.9627	0.9819	0.9771	0.958	0.997	Conserved
Chr12	8200000	8250000	0.9587	0.93	0.7708	0.9486	0.6956	va_W
Chr12	8250000	8300000	0.9259	0.8804	0.8797	0.9136	0.9419	va_W
Chr12	8300000	8350000	0.6283	0.7147	0.3615	0.8254	0.9992	Specific
Chr12	8350000	8400000	0.9642	0.9492	0.3507	0.8178	1	va_W
Chr12	8400000	8450000	0.9614	0.8804	0.9154	0.8946	0.8372	va_W
Chr12	8450000	8500000	0.8472	0.9834	0.8482	0.8528	0.985	va_N
Chr12	8500000	8550000	0.9811	0.7155	0.9809	0.8653	0.9835	Conserved
Chr12	8550000	8600000	0.763	0.7305	0.7878	0.9143	0.9868	va_S
Chr12	8600000	8650000	0.5879	0.8994	0.8813	0.9872	0.6654	va_S
Chr12	8650000	8700000	0.9403	0.823	0.8858	0.9128	1	va_W
Chr12	8700000	8750000	0.9601	0.9117	0.9315	0.9485	0.9894	va_W
Chr12	8750000	8800000	0.9654	0.9838	0.9889	0.974	0.9513	va_E
Chr12	8800000	8850000	0.9534	0.8129	0.7419	0.9397	0.9783	va_W
Chr12	8850000	8900000	0.8408	0.9492	0.5723	0.4112	1	va_N
Chr12	8900000	8950000	0.8152	0.9507	0.6118	0.4412	1	va_N
Chr12	8950000	9000000	0.934	0.9492	0.5723	0.4112	1	va_N
Chr12	9000000	9050000	0.9192	0.9492	0.5723	0.4112	1	va_N
Chr12	9050000	9100000	0.9462	0.9492	0.6244	0.7137	1	Conserved
Chr12	9100000	9150000	0.9539	0.9644	0.9678	0.7765	0.9874	Conserved
Chr12	9150000	9200000	0.9708	0.9988	0.9673	0.7766	1	va_N
Chr12	9200000	9250000	0.9708	0.9988	0.755	0.9703	1	va_N
Chr12	9250000	9300000	0.9708	0.9988	0.9157	0.9672	1	va_N
Chr12	9300000	9350000	0.9708	0.9988	0.8781	0.9672	1	va_N
Chr12	9350000	9400000	0.9708	0.9988	0.9608	0.9771	1	va_N
Chr12	9400000	9450000	0.9786	0.9697	0.9646	0.946	0.9868	va_W
Chr12	9450000	9500000	0.9939	0.9173	0.9212	0.9033	1	va_W
Chr12	9500000	9550000	0.9898	0.8484	0.8002	0.8272	0.9592	va_W
Chr12	9550000	9600000	0.6857	0.8465	0.8268	0.7389	1	Specific
Chr12	9600000	9650000	0.8132	0.9284	0.9813	0.983	0.9912	Conserved
Chr12	9650000	9700000	0.8572	0.9746	0.9748	0.9738	0.1906	Specific
Chr12	9700000	9750000	0.9375	0.9856	0.6012	0.8074	0.6918	va_N
Chr12	9750000	9800000	0.9087	0.9856	0.9639	0.8776	1	va_N
Chr12	9800000	9850000	0.9431	0.9856	0.9514	0.9931	1	va_S
Chr12	9850000	9900000	0.9713	0.9847	0.9677	0.8896	0.9484	va_N
Chr12	9900000	9950000	0.9576	0.9181	0.9175	0.8508	0.7717	va_W
Chr12	9950000	10000000	0.8741	0.7206	0.7324	0.9573	0.9897	va_S
Chr12	10000000	10050000	0.7258	0.9817	0.9012	0.9254	1	va_N
Chr12	10050000	10100000	0.9013	0.9359	0.9085	0.9254	0.9982	va_N
Chr12	10100000	10150000	0.9447	0.9533	0.9506	0.8372	0.9786	Conserved
Chr12	10150000	10200000	0.9653	0.9706	0.9793	0.9776	1	Conserved
Chr12	10200000	10250000	0.9819	0.8424	0.9355	0.9472	0.995	va_W
Chr12	10250000	10300000	0.8753	0.8156	0.9137	0.9516	0.9869	va_S
Chr12	10300000	10350000	0.9606	0.965	0.9668	0.9529	0.9151	Conserved
Chr12	10350000	10400000	0.9723	0.982	0.9749	0.9815	0.9754	Conserved
Chr12	10400000	10450000	0.8333	0.9252	0.8475	0.8752	1	va_N
Chr12	10450000	10500000	0.9596	0.5929	0.5798	0.9022	0.9995	va_W
Chr12	10500000	10550000	0.4206	0.4043	0.406	0.4781	0.8347	Specific
Chr12	10550000	10600000	0.6275	0	0	0.4901	0.9919	Specific
Chr12	10600000	10650000	0.861	0	0	0.3477	1	va_W
Chr12	10650000	10700000	0.8752	0	0	0.3477	1	va_W
Chr12	10700000	10750000	0.6221	0.9715	0	0.5886	0.9377	va_N
Chr12	10750000	10800000	0.839	0.9397	0	0.7367	1	va_N
Chr12	10800000	10850000	0.449	0.616	0	0.7916	0.8742	Specific
Chr12	10850000	10900000	0.9035	0.663	0	0.9544	0.9482	va_S
Chr12	10900000	10950000	0.9583	0.7935	0	0	1	va_W
Chr12	10950000	11000000	0.9352	0.7935	0	0.9623	1	va_S
Chr12	11000000	11050000	0.9845	0.8245	0	0.3977	1	va_W
Chr12	11050000	11100000	0	0.7866	0.9598	0.2163	1	va_E
Chr12	11100000	11150000	0.9752	0.6909	0	0.8468	1	va_W
Chr12	11150000	11200000	0	0.7787	0	0.8876	0.9965	va_S
Chr12	11200000	11250000	0	0.9342	0.9655	0.9627	0.2111	Conserved
Chr12	11250000	11300000	0	0	0.577	0.5938	0.4252	Specific
Chr12	11300000	11350000	0.3142	0	0.6792	0.678	0.5056	Specific
Chr12	11350000	11400000	0.8569	0.9604	0.803	0.9401	0.4343	va_N
Chr12	11400000	11450000	0.7056	0.9662	0.7371	0.5104	0.5564	va_N
Chr12	11450000	11500000	0.7853	0.849	0.7657	0.8004	0.9004	Specific
Chr12	11500000	11550000	0.9337	0.8384	0.8402	0.8213	1	va_W
Chr12	11550000	11600000	0.9396	0.8384	0.9361	0.8906	0.3423	Conserved
Chr12	11600000	11650000	0	0	0	0	0	Specific
Chr12	11650000	11700000	0.969	0.8221	0.9506	0.9479	1	va_W
Chr12	11700000	11750000	0.8387	0.7839	0	0	1	Specific
Chr12	11750000	11800000	0.6886	0.7839	0	0.9614	1	va_S
Chr12	11800000	11850000	0.5372	0.7628	0	0	1	Specific
Chr12	11850000	11900000	0.5665	0.5813	0	0.7403	1	Specific
Chr12	11900000	11950000	0.4775	0.7108	0.9975	0	0.5481	va_E
Chr12	11950000	12000000	0.9703	0.9487	0.9828	0.8298	1	va_E
Chr12	12000000	12050000	0.655	0.8048	0.8668	0.8289	0.6741	va_E
Chr12	12050000	12100000	0.935	0.5507	0.9427	0	0.5821	va_E
Chr12	12100000	12150000	0	0.8805	0	0.8765	0.5263	Conserved
Chr12	12150000	12200000	0	0.6148	0	0.5537	1	Specific
Chr12	12200000	12250000	0	0.598	0	0.7185	0.9505	Specific
Chr12	12250000	12300000	0	0.6354	0	0.6518	0.9857	Specific
Chr12	12300000	12350000	0.9549	0.5465	0.9524	0.6637	0.7305	Conserved
Chr12	12350000	12400000	0.7569	0.6957	0.7495	0.7536	0.9571	Specific
Chr12	12400000	12450000	0.6473	0.6608	0.8098	0.7837	0.9951	Specific
Chr12	12450000	12500000	0.9015	0.9599	0.8622	0.914	0.9016	va_N
Chr12	12500000	12550000	0.9025	0.9622	0.7753	0.9638	0.5521	Conserved
Chr12	12550000	12600000	0.9745	0.9745	0.864	0.7321	0.7021	Conserved
Chr12	12600000	12650000	0.9509	0.9425	0.3442	0.8776	0.5127	va_W
Chr12	12650000	12700000	0.7392	0.7392	0.7843	0.8426	0.9424	Specific
Chr12	12700000	12750000	0.8861	0.8858	0.8939	0.7149	0.9215	va_E
Chr12	12750000	12800000	0.6612	0.675	0.7612	0.8724	0.4133	va_S
Chr12	12800000	12850000	0.4254	0.4929	0.5562	0.9549	0.9653	va_S
Chr12	12850000	12900000	0.4194	0.8601	0.9384	0.9664	0.9095	va_S
Chr12	12900000	12950000	0.9517	0.9599	0.8945	0.9628	0.6947	Conserved
Chr12	12950000	13000000	0	0	0.5255	0.9578	0.3095	va_S
Chr12	13000000	13050000	0.3492	0	0.3506	0	0.4389	Specific
Chr12	13050000	13100000	0.5317	0.9621	0.9427	0	0.3712	va_N
Chr12	13100000	13150000	0.8656	0.6275	0.9443	0	0.6347	va_E
Chr12	13150000	13200000	0.6085	0.613	0.9426	0	0.7144	va_E
Chr12	13200000	13250000	0.3461	0.7097	0.8785	0.9669	0.8302	va_S
Chr12	13250000	13300000	0.4001	0.7342	0.7314	0.5632	0.9992	Specific
Chr12	13300000	13350000	0	0.7493	0	0.5975	0.9564	Specific
Chr12	13350000	13400000	0	0	0	0.8824	0.1871	Specific
Chr12	13400000	13450000	0	0	0	0	0	Specific
Chr12	13450000	13500000	0.9613	0	0.9317	0.9641	0.3284	Conserved
Chr12	13500000	13550000	0.9385	0.5251	0.8985	0.3622	0.5802	va_W
Chr12	13550000	13600000	0.9342	0.512	0.9953	0.3623	0.9882	va_E
Chr12	13600000	13650000	0.7045	0.9828	0.7073	0.7127	0.9975	va_N
Chr12	13650000	13700000	0.9318	0.8391	0.594	0.8393	0.9389	va_W
Chr12	13700000	13750000	0.5968	0.8037	0.7273	0.8018	0.8707	Specific
Chr12	13750000	13800000	0.5777	0.7188	0.6936	0.665	0.9189	Specific
Chr12	13800000	13850000	0.7935	0.7784	0.6686	0.6909	0.9957	Specific
Chr12	13850000	13900000	0.8085	0.941	0.9738	0.6726	0.9988	va_E
Chr12	13900000	13950000	0.9386	0.8694	0.957	0.9736	0.9984	va_S
Chr12	13950000	14000000	0.8979	0.9336	0.787	0.9311	0.9771	Conserved
Chr12	14000000	14050000	0.9762	0.9524	0.8289	0.8988	0.9977	va_W
Chr12	14050000	14100000	0.8706	0.867	0.8464	0.9111	0.9965	va_S
Chr12	14100000	14150000	0.826	0.884	0.9137	0.9272	1	va_S
Chr12	14150000	14200000	0.8246	0.9527	0.9833	0.9907	1	va_S
Chr12	14200000	14250000	0.7932	0.7084	0.9654	0.9661	1	Conserved
Chr12	14250000	14300000	0.6992	0.932	0.9841	0	0.55	va_E
Chr12	14300000	14350000	0.9984	0.6126	0.8752	0.9771	1	va_W
Chr12	14350000	14400000	0.9984	0.5942	0.8563	0.9771	1	va_W
Chr12	14400000	14450000	0.9983	0.9757	0.9503	0.9684	1	va_W
Chr12	14450000	14500000	0.9649	0.9429	0.9321	0.9534	0.9984	va_W
Chr12	14500000	14550000	0.9539	0.9246	0.9624	0.9388	1	va_E
Chr12	14550000	14600000	0.967	0.8366	0.9425	0.9364	0.994	va_W
Chr12	14600000	14650000	0.9882	0.8898	0.8409	0.9528	1	va_W
Chr12	14650000	14700000	0.9882	0.8924	0.9277	0.8231	1	va_W
Chr12	14700000	14750000	0.9882	0.7641	0.927	0.7785	1	va_W
Chr12	14750000	14800000	0.9817	0.6171	0.9308	0.7135	0.9983	va_W
Chr12	14800000	14850000	0.9682	0.3861	0.4776	0.3984	1	va_W
Chr12	14850000	14900000	0.9679	0.4709	0.4686	0.4465	1	va_W
Chr12	14900000	14950000	0.9645	0.792	0.8063	0.7226	1	va_W
Chr12	14950000	15000000	0.9391	0.7625	0.8966	0.8349	1	va_W
Chr12	15000000	15050000	0.809	0.9563	0.7957	0.6582	1	va_N
Chr12	15050000	15100000	0.6175	0.9528	0.5429	0.4614	1	va_N
Chr12	15100000	15150000	0.9868	0.9748	0.9604	0.8684	0.7729	va_W
Chr12	15150000	15200000	0.6332	0.634	0.905	0.8827	0.8827	va_E
Chr12	15200000	15250000	0.9144	0.9052	0.9576	0.8179	0.7315	va_E
Chr12	15250000	15300000	0.9321	0.932	0.8949	0.8018	1	Conserved
Chr12	15300000	15350000	0	0.5658	0.8882	0.9502	0.5367	va_S
Chr12	15350000	15400000	0.8222	0.8487	0.8685	0	1	va_E
Chr12	15400000	15450000	0.8222	0.8279	0.884	0	1	va_E
Chr12	15450000	15500000	0.8129	0.4779	0.9059	0	1	va_E
Chr12	15500000	15550000	0.5691	0.5573	0.8002	0.9213	1	va_S
Chr12	15550000	15600000	0.6614	0.5139	0.917	0.9656	1	va_S
Chr12	15600000	15650000	0.4145	0.6804	0.8836	0	1	va_E
Chr12	15650000	15700000	0.7504	0.7995	0.6555	0.9629	1	va_S
Chr12	15700000	15750000	0.7514	0.8301	0.6082	0.9666	1	va_S
Chr12	15750000	15800000	0.8723	0.786	0.8254	0	1	va_W
Chr12	15800000	15850000	0	0.9184	0.7546	0	1	va_N
Chr12	15850000	15900000	0.9827	0.5386	0.7168	0.9418	1	va_W
Chr12	15900000	15950000	0.9694	0.5859	0.7778	0.9621	1	va_W
Chr12	15950000	16000000	0.9298	0.5467	0.9455	0	0.7322	va_E
Chr12	16000000	16050000	0.6426	0.8765	0.9422	0	1	va_E
Chr12	16050000	16100000	0.6143	0.8749	0.4648	0	1	va_N
Chr12	16100000	16150000	0.5982	0.9246	0.5933	0.8564	1	va_N
Chr12	16150000	16200000	0.3508	0.9922	0.4753	0.9733	0.6045	va_N
Chr12	16200000	16250000	0.9491	0.9712	0.9257	0.9548	1	va_N
Chr12	16250000	16300000	0.8731	0.9715	0.7657	0.9351	1	va_N
Chr12	16300000	16350000	0.9276	0.695	0.8448	0.8069	0.9964	va_W
Chr12	16350000	16400000	0.9338	0.9897	0.853	0.7201	1	va_N
Chr12	16400000	16450000	0.9538	0.9922	0.8701	0.7978	0.9891	va_N
Chr12	16450000	16500000	0.7692	0.8701	0.8733	0.8997	0.8965	va_S
Chr12	16500000	16550000	0.4782	0.6848	0.6867	0.7045	1	Specific
Chr12	16550000	16600000	0.9349	0.707	0.8724	0.8693	0.9955	va_W
Chr12	16600000	16650000	0.7295	0.8872	0.9639	0.8228	0.993	va_E
Chr12	16650000	16700000	0.8116	0.956	0.6641	0.8547	0.8406	va_N
Chr12	16700000	16750000	0.7457	0.6734	0.6468	0.6178	0.6667	Specific
Chr12	16750000	16800000	0.726	0.9523	0.8357	0.7333	0.8281	va_N
Chr12	16800000	16850000	0.8254	0.7993	0.8407	0.7959	0.9087	Specific
Chr12	16850000	16900000	0.6796	0.633	0.6618	0.8159	0.936	Specific
Chr12	16900000	16950000	0.9515	0.9695	0.691	0.8011	0.9786	va_N
Chr12	16950000	17000000	0.9769	0.9361	0.9045	0.9114	1	va_W
Chr12	17000000	17050000	0.6415	0.909	0.9045	0.8904	1	Conserved
Chr12	17050000	17100000	0.9501	0.8649	0.8662	0.8822	0.904	va_W
Chr12	17100000	17150000	0.9647	0.743	0.8312	0.9408	0.9729	va_W
Chr12	17150000	17200000	0.9936	0.8895	0.664	0.8381	0.9981	va_W
Chr12	17200000	17250000	0.9872	0.9798	0.9201	0.958	0.9362	va_W
Chr12	17250000	17300000	0.9037	0.9224	0.9966	0.9398	0.9994	va_E
Chr12	17300000	17350000	0.8476	0.7988	0.9183	0.9263	0.9799	va_S
Chr12	17350000	17400000	0.7447	0.6489	0.7907	0.602	1	Specific
Chr12	17400000	17450000	0.7955	0.7831	0.8055	0.5861	1	Specific
Chr12	17450000	17500000	0.657	0.8434	0.9218	0.6541	0.9309	va_E
Chr12	17500000	17550000	0.9251	0.9676	0.9613	0.8368	0.8976	va_N
Chr12	17550000	17600000	0.9659	0.5551	0.8001	0.8442	0.5168	va_W
Chr12	17600000	17650000	0.9847	0.5126	0.8031	0.8753	0.995	va_W
Chr12	17650000	17700000	0.9948	0.8163	0.8655	0.9219	1	va_W
Chr12	17700000	17750000	0.9915	0.843	0.9531	0.8944	0.991	va_W
Chr12	17750000	17800000	0.9051	0.9216	0.8502	0.6247	1	va_N
Chr12	17800000	17850000	0.7797	0.9237	0.8686	0.932	1	va_S
Chr12	17850000	17900000	0.9621	0.9605	0.9652	0.9529	0.9793	Conserved
Chr12	17900000	17950000	0.9531	0.9527	0.9282	0.95	0.9967	Conserved
Chr12	17950000	18000000	0.9398	0.8956	0.8723	0.9043	1	va_W
Chr12	18000000	18050000	0.9398	0.9505	0.8753	0.8711	1	va_N
Chr12	18050000	18100000	0.9591	0.9425	0.9258	0.8863	0.9208	va_W
Chr12	18100000	18150000	0.9912	0.9714	0.976	0.9816	1	va_W
Chr12	18150000	18200000	0.9372	0.8689	0.8877	0.9507	0.9968	va_S
Chr12	18200000	18250000	0.9211	0.8428	0.7938	0.6742	0.91	va_W
Chr12	18250000	18300000	0.92	0.6705	0.772	0.7892	1	va_W
Chr12	18300000	18350000	0.9212	0.7574	0.7492	0.7708	1	va_W
Chr12	18350000	18400000	0.92	0.914	0.7492	0.7708	1	va_W
Chr12	18400000	18450000	0.92	0.914	0.7492	0.7708	1	va_W
Chr12	18450000	18500000	0.8955	0.914	0.7492	0.7708	1	va_N
Chr12	18500000	18550000	0.6351	0.9709	0.8759	0.8385	0.5853	va_N
Chr12	18550000	18600000	0.6351	0.9919	0.4976	0.9473	1	va_N
Chr12	18600000	18650000	0.7509	0.6176	0.4976	0.7484	1	Specific
Chr12	18650000	18700000	0.8537	0.7106	0.7777	0.8163	0.4625	va_W
Chr12	18700000	18750000	0.9614	0.9696	0.9629	0.9649	1	Conserved
Chr12	18750000	18800000	0.7654	0.8771	0.9113	0.6989	0.788	va_E
Chr12	18800000	18850000	0.5286	0.8355	0.8797	0.591	1	va_E
Chr12	18850000	18900000	0.9094	0.6177	0.6036	0.7039	0.49	va_W
Chr12	18900000	18950000	0.9529	0.798	0.9601	0.7842	0.9491	va_E
Chr12	18950000	19000000	0.9458	0.867	0.9384	0.6748	1	va_W
Chr12	19000000	19050000	0.4705	0.6182	0.5543	0.536	1	Specific
Chr12	19050000	19100000	0.5335	0.6262	0.4787	0.5227	0.5739	Specific
Chr12	19100000	19150000	0.7832	0.9741	0.964	0.976	0.6014	Conserved
Chr12	19150000	19200000	0.7576	0.9628	0.8834	0.5801	1	va_N
Chr12	19200000	19250000	0.8749	0.9837	0.9709	0.362	1	va_N
Chr12	19250000	19300000	0.7736	0.9837	0.9418	0.362	1	va_N
Chr12	19300000	19350000	0.7227	0.8091	0.8802	0.8815	1	Conserved
Chr12	19350000	19400000	0.7113	0.9836	0.7235	0.9836	1	Conserved
Chr12	19400000	19450000	0.8366	0.7577	0.858	0.7578	1	va_E
Chr12	19450000	19500000	0.8879	0.9472	0.7235	0.9473	1	Conserved
Chr12	19500000	19550000	0.9781	0.8651	0.9706	0.9451	1	va_W
Chr12	19550000	19600000	0.9217	0.9692	0.8813	0.9692	1	Conserved
Chr12	19600000	19650000	0.6506	0.976	0.663	0.9325	0.973	va_N
Chr12	19650000	19700000	0.5923	0.6866	0.8708	0.9287	1	va_S
Chr12	19700000	19750000	0.6297	0.6774	0.8708	0.8085	1	va_E
Chr12	19750000	19800000	0.7222	0.5844	0.8998	0.7081	0.7292	va_E
Chr12	19800000	19850000	0.8252	0.9672	0.8101	0.9672	0.9523	Conserved
Chr12	19850000	19900000	0.8725	0.9946	0.5783	0.9786	0.9337	va_N
Chr12	19900000	19950000	0.8745	0.9558	0.9079	0.857	1	va_N
Chr12	19950000	20000000	0.9679	0.9323	0.8917	0.9846	1	va_S
Chr12	20000000	20050000	0.9671	0.9733	0.9206	0.9671	0.937	va_N
Chr12	20050000	20100000	0.921	0.8831	0.7978	0.8545	0.9948	va_W
Chr12	20100000	20150000	0.925	0.9761	0.932	0.9691	1	va_N
Chr12	20150000	20200000	0.963	0.9976	0.6501	0.9971	1	Conserved
Chr12	20200000	20250000	0.8661	0.9957	0.7898	0.9956	0.9929	Conserved
Chr12	20250000	20300000	0.8675	0.9898	0.9129	0.991	1	Conserved
Chr12	20300000	20350000	0.9657	0.9679	0.8727	0.6603	0.8923	Conserved
Chr12	20350000	20400000	0.967	0.9821	0.8596	0.2842	0.1429	Specific
Chr12	20400000	20450000	0.9028	0.8343	0.6488	0.567	0.8683	va_W
Chr12	20450000	20500000	0.9364	0.8856	0.855	0.9592	0.2272	va_S
Chr12	20500000	20550000	0.6309	0.8232	0.5077	0.6557	0.7784	Specific
Chr12	20550000	20600000	0.4752	0	0.2933	0.9597	0.1698	Specific
Chr12	20600000	20650000	0.951	0.9585	0.9211	0.8878	0.7872	va_N
Chr12	20650000	20700000	0.9107	0.8721	0.8709	0.9644	0.7902	va_S
Chr12	20700000	20750000	0.8473	0.9291	0.8175	0.7835	0.9837	va_N
Chr12	20750000	20800000	0.5986	0.8976	0.7248	0.6716	1	va_N
Chr12	20800000	20850000	0.7676	0.8761	0.8825	0.9004	0.7666	va_S
Chr12	20850000	20900000	0.9315	0.847	0.87	0.8734	0.9502	va_W
Chr12	20900000	20950000	0.8057	0.6498	0.8848	0.8928	0.8031	va_S
Chr12	20950000	21000000	0.4313	0.4155	0.4476	0.7923	0.9797	Specific
Chr12	21000000	21050000	0.7474	0.9073	0.8806	0.9553	0.998	va_S
Chr12	21050000	21100000	0.8389	0.9372	0.946	0.883	0.7926	va_E
Chr12	21100000	21150000	0	0.8672	0.9218	0.6608	0.9356	va_E
Chr12	21150000	21200000	0.7278	0.9455	0.9504	0.9521	0.9961	Conserved
Chr12	21200000	21250000	0.9733	0.9687	0.9074	0.9342	0.9065	Conserved
Chr12	21250000	21300000	0.9197	0.8381	0.7788	0.887	0.981	va_W
Chr12	21300000	21350000	0.9282	0.7698	0.8909	0.9744	1	va_S
Chr12	21350000	21400000	0.9452	0.8768	0.9348	0.9654	0.9796	va_S
Chr12	21400000	21450000	0.9514	0.9758	0.9819	0.9757	0.9582	va_E
Chr12	21450000	21500000	0.9345	0.9277	0.9753	0.9707	0.9774	Conserved
Chr12	21500000	21550000	0.926	0.9596	0.9689	0.9724	0.7233	Conserved
Chr12	21550000	21600000	0.5936	0.8437	0.7049	0.8382	0.9629	Specific
Chr12	21600000	21650000	0.6399	0.5587	0.9233	0.9297	0.5702	va_S
Chr12	21650000	21700000	0.812	0.9781	0.9085	0.9656	0.7247	va_N
Chr12	21700000	21750000	0.9638	0.948	0.9142	0.9683	0.7931	Conserved
Chr12	21750000	21800000	0.9371	0	0.9547	0	0.3583	va_E
Chr12	21800000	21850000	0.8081	0.7973	0.8932	0.8195	0.6473	va_E
Chr12	21850000	21900000	0	0.4962	0	0.6747	1	Specific
Chr12	21900000	21950000	0.9668	0	0.8925	0.785	0.9943	va_W
Chr12	21950000	22000000	0.6526	0	0.9526	0.8739	1	va_E
Chr12	22000000	22050000	0.9589	0.9662	0.919	0.906	0.3211	va_N
Chr12	22050000	22100000	0.8292	0.5426	0.5229	0	0.353	Specific
Chr12	22100000	22150000	0.8665	0.5998	0.3844	0.1491	0.6814	va_W
Chr12	22150000	22200000	0	0.5587	0.0325	0.0454	1	Specific
Chr12	22200000	22250000	0.7715	0.6606	0.2319	0.1169	1	Specific
Chr12	22250000	22300000	0.8027	0.9078	0.5315	0.9553	1	va_S
Chr12	22300000	22350000	0.876	0.6456	0.6191	0.7142	0.7565	va_W
Chr12	22350000	22400000	0	0.8232	0.9747	0.7142	0.7062	va_E
Chr12	22400000	22450000	0	0	0	0	0	Specific
Chr12	22450000	22500000	0.9771	0.9532	0.9792	0.972	0.3505	Conserved
Chr12	22500000	22550000	0.8304	0.4044	0.3485	0.8303	0.9884	Specific
Chr12	22550000	22600000	0	0.4481	0.3984	0.8411	0.9588	Specific
Chr12	22600000	22650000	0.9609	0.8816	0.9818	0.9741	0.9639	va_E
Chr12	22650000	22700000	0.6786	0.931	0.8093	0.8062	0.8659	va_N
Chr12	22700000	22750000	0.5954	0.9426	0.6651	0.7229	0.9875	va_N
Chr12	22750000	22800000	0.9598	0.9656	0.6756	0.6864	0.9777	va_N
Chr12	22800000	22850000	0.7831	0.9546	0.9825	0.7936	0.9285	va_E
Chr12	22850000	22900000	0.9804	0.7116	0.9886	0.7071	0.9877	va_E
Chr12	22900000	22950000	0.9635	0.7145	0.9824	0	0.7923	va_E
Chr12	22950000	23000000	0.9048	0.7921	0	0	0.6901	va_W
Chr12	23000000	23050000	0.9666	0.6874	0.9808	0	0.8536	va_E
Chr12	23050000	23100000	0.9467	0.77	0.978	0.9205	0.5686	va_E
Chr12	23100000	23150000	0.937	0.8351	0.7899	0.9792	0.3234	va_S
Chr12	23150000	23200000	0.9634	0.968	0	0.9673	0.1286	Specific
Chr12	23200000	23250000	0	0.7966	0	0	0.1708	Specific
Chr12	23250000	23300000	0.6764	0.5383	0.7018	0.7152	0.9993	Specific
Chr12	23300000	23350000	0.6687	0.6776	0.7018	0.7152	1	Specific
Chr12	23350000	23400000	0.6742	0.9394	0.6773	0.7415	0.8604	va_N
Chr12	23400000	23450000	0.9552	0.9688	0.9706	0.9718	0.6563	Conserved
Chr12	23450000	23500000	0.9703	0.8936	0.9457	0.9714	0.8483	Conserved
Chr12	23500000	23550000	0.9535	0.9601	0.9239	0.962	0.9512	Conserved
Chr12	23550000	23600000	0.7842	0.6881	0.78	0.8278	0.9591	Specific
Chr12	23600000	23650000	0.8954	0.7779	0.8745	0.4522	0.9646	va_W
Chr12	23650000	23700000	0.7412	0.6609	0.6932	0.806	0.9876	Specific
Chr12	23700000	23750000	0.8316	0.7878	0.8135	0.8071	0.9905	Specific
Chr12	23750000	23800000	0.6973	0.736	0.8118	0.7531	0.8899	Specific
Chr12	23800000	23850000	0.7964	0.8384	0.7994	0.7698	1	Specific
Chr12	23850000	23900000	0.8547	0.8411	0.8982	0.9673	1	va_S
Chr12	23900000	23950000	0.8235	0.6062	0.7491	0.6426	1	Specific
Chr12	23950000	24000000	0.9681	0.9367	0.8607	0.925	0.9452	va_W
Chr12	24000000	24050000	0.9095	0.9745	0.9849	0.9645	0.9365	va_E
Chr12	24050000	24100000	0.9571	0.906	0.8753	0.7672	0.9844	va_W
Chr12	24100000	24150000	0.9687	0.9783	0.9229	0.7799	0.9934	va_N
Chr12	24150000	24200000	0.7191	0.9111	0.9797	0.9046	0.9974	va_E
Chr12	24200000	24250000	0.9446	0.9521	0.9933	0.92	0.998	va_E
Chr12	24250000	24300000	0.7921	0.9259	0.9943	0.9819	1	va_E
Chr12	24300000	24350000	0.8197	0.9333	0.9943	0.9967	1	Conserved
Chr12	24350000	24400000	0.9556	0.5753	0.9865	0.9657	0.9874	va_E
Chr12	24400000	24450000	0.9807	0.992	0.9667	0.8562	0.9771	va_N
Chr12	24450000	24500000	0.9887	0.9584	0.9667	0.9411	1	va_W
Chr12	24500000	24550000	0.9778	0.882	0.9671	0.936	0.9791	va_W
Chr12	24550000	24600000	0.9606	0.8108	0	0.936	0.8467	va_W
Chr12	24600000	24650000	0	0.9098	0	0.9644	0.735	va_S
Chr12	24650000	24700000	0	0.945	0.391	0.8662	1	va_N
Chr12	24700000	24750000	0.9847	0.9559	0.5209	0.9019	1	va_W
Chr12	24750000	24800000	0	0.9604	0	0.8031	0.7788	va_N
Chr12	24800000	24850000	0	0.9376	0	0.7222	1	va_N
Chr12	24850000	24900000	0	0.6562	0	0	0.1768	Specific
Chr12	24900000	24950000	0.3163	0.8297	0	0.8783	0.2541	va_S
Chr12	24950000	25000000	0.8837	0.9503	0	0.9082	0.6385	va_N
Chr12	25000000	25050000	0	0.9195	0	0.9656	0.7463	va_S
Chr12	25050000	25100000	0.952	0.9424	0.9703	0	0.1551	Specific
Chr12	25100000	25150000	0.9564	0.79	0.9939	0	0.8489	va_E
Chr12	25150000	25200000	0	0.8591	0.9953	0	0.99	va_E
Chr12	25200000	25250000	0.9592	0.9762	0.9591	0	1	va_N
Chr12	25250000	25300000	0.9498	0.9983	0.9591	0	1	va_N
Chr12	25300000	25350000	0	0.9914	0.9591	0.9095	1	va_N
Chr12	25350000	25400000	0	0.8389	0.8309	0.9021	1	va_S
Chr12	25400000	25450000	0.9583	0.198	0.2202	0.6816	1	va_W
Chr12	25450000	25500000	0	0.2907	0.198	0.9522	1	va_S
Chr12	25500000	25550000	0	0.2305	0.198	0	1	Specific
Chr12	25550000	25600000	0	0.5695	0.5624	0	1	Specific
Chr12	25600000	25650000	0.8712	0.9983	0.9982	0.9628	1	Conserved
Chr12	25650000	25700000	0.7999	0.9542	0.9544	0.7763	0.996	Conserved
Chr12	25700000	25750000	0.9293	0.9499	0.95	0.8496	1	Conserved
Chr12	25750000	25800000	0.9348	0.9499	0.95	0.9389	1	Conserved
Chr12	25800000	25850000	0	0.9499	0.95	0.4771	1	Conserved
Chr12	25850000	25900000	0.9622	0.9499	0.95	0.6591	1	va_W
Chr12	25900000	25950000	0.9518	0.9499	0.95	0.9633	1	va_S
Chr12	25950000	26000000	0.9632	0.9503	0.95	0	1	va_W
Chr12	26000000	26050000	0.8305	0.9503	0.95	0	1	Conserved
Chr12	26050000	26100000	0.941	0.9499	0.95	0.9668	1	va_S
Chr12	26100000	26150000	0.8009	0.9499	0.95	0.9384	1	Conserved
Chr12	26150000	26200000	0.313	0.9505	0.9506	0.7682	0.9856	Conserved
Chr12	26200000	26250000	0.9695	0.8354	0.837	0.8971	0.8543	va_W
Chr12	26250000	26300000	0.986	0.9129	0.8003	0.9634	0.9967	va_W
Chr12	26300000	26350000	0.7363	0.8015	0.7845	0.8257	1	Specific
Chr12	26350000	26400000	0.9627	0.9737	0.9678	0.857	0.9982	va_N
Chr12	26400000	26450000	0.9096	0.9754	0.9813	0.8777	0.9969	va_E
Chr12	26450000	26500000	0.916	0.9715	0.9853	0.9813	0.9913	Conserved
Chr12	26500000	26550000	0.6967	0.9647	0.9895	0.6255	0.9466	va_E
Chr12	26550000	26600000	0.8859	0.9449	0.98	0.9586	0.9735	va_E
Chr12	26600000	26650000	0.9218	0.9294	0.9558	0.9443	0.9445	va_E
Chr12	26650000	26700000	0.9787	0.929	0.9276	0.9278	0.9907	va_W
Chr12	26700000	26750000	0.9313	0.9887	0.849	0.9871	0.998	Conserved
Chr12	26750000	26800000	0.708	0.9898	0.9846	0.9798	1	va_N
Chr12	26800000	26850000	0.7782	0.7856	0.6081	0.9458	1	va_S
Chr12	26850000	26900000	0.8032	0.7077	0.8016	0.9455	1	va_S
Chr12	26900000	26950000	0.9166	0.8757	0.7396	0.8808	1	va_W
Chr12	26950000	27000000	0.9235	0.8256	0.9613	0.8839	1	va_E
Chr12	27000000	27050000	0.9306	0.7363	0.7702	0.9877	1	va_S
Chr12	27050000	27100000	0.9848	0.8756	0.8312	0.968	0.9963	va_W
Chr12	27100000	27150000	0.8434	0.9704	0.8098	0.9777	0.9984	va_S
Chr12	27150000	27167716	0.8139	0.9852	0.8231	0.9903	0.9583	va_S
Chr13	0	50000	0.9849	0.6194	0.9368	0.947	0.7829	va_W
Chr13	50000	100000	0.7186	0.4146	0.5159	0.4753	0.7373	Specific
Chr13	100000	150000	0.7112	0.5484	0.3449	0.5273	0.9006	Specific
Chr13	150000	200000	0.852	0.9408	0	0.7009	0.7887	va_N
Chr13	200000	250000	0.8313	0.8973	0.9945	0.7808	0.9655	va_E
Chr13	250000	300000	0.7355	0.8178	0.9956	0.7753	0.9988	va_E
Chr13	300000	350000	0.6439	0.9524	0.98	0.7377	1	va_E
Chr13	350000	400000	0.6829	0.7577	0.9811	0.6952	0.9886	va_E
Chr13	400000	450000	0.8957	0.9221	0.9935	0.9265	0.9847	va_E
Chr13	450000	500000	0.952	0.8992	0.9886	0.8639	0.9963	va_E
Chr13	500000	550000	0.9658	0.8897	0.9906	0.6961	1	va_E
Chr13	550000	600000	0.9555	0.9817	0.9821	0.8396	1	Conserved
Chr13	600000	650000	0.8952	0.9817	0.9821	0.9208	1	Conserved
Chr13	650000	700000	0.9492	0.9817	0.9821	0.7756	1	Conserved
Chr13	700000	750000	0.8721	0.9817	0.9821	0.8724	1	Conserved
Chr13	750000	800000	0.9807	0.981	0.9815	0.98	0.9901	Conserved
Chr13	800000	850000	0.9662	0.974	0.9791	0.9754	0.9959	Conserved
Chr13	850000	900000	0.8976	0.9683	0.8675	0.9237	1	va_N
Chr13	900000	950000	0.9505	0.952	0.9673	0.9884	1	va_S
Chr13	950000	1000000	0.987	0.9827	0.9742	0.9887	0.9803	Conserved
Chr13	1000000	1050000	0.9891	0.9861	0.9859	0.8309	0.9754	Conserved
Chr13	1050000	1100000	0.954	0.9906	0.9582	0.7797	0.9978	va_N
Chr13	1100000	1150000	0.9239	0.8912	0.9213	0.9324	0.864	va_S
Chr13	1150000	1200000	0.9707	0.9526	0.9663	0.8659	1	Conserved
Chr13	1200000	1250000	0.9848	0.981	0.9079	0.9484	0.978	Conserved
Chr13	1250000	1300000	0.9733	0.9669	0.9745	0.9623	0.9904	Conserved
Chr13	1300000	1350000	0.9946	0.9852	0.964	0.9815	1	va_W
Chr13	1350000	1400000	0.9274	0.9282	0.8549	0.9738	0.9854	va_S
Chr13	1400000	1450000	0.9877	0.9785	0.9733	0.9782	0.9883	va_W
Chr13	1450000	1500000	0.8841	0.9855	0.9778	0.983	0.9834	Conserved
Chr13	1500000	1550000	0.9447	0.9752	0.9835	0.9821	1	Conserved
Chr13	1550000	1600000	0.9495	0.9103	0.8975	0.973	0.9875	va_S
Chr13	1600000	1650000	0.9731	0.6973	0.966	0.9882	0.9938	va_S
Chr13	1650000	1700000	0.7644	0.2264	0.9329	0.9775	1	va_S
Chr13	1700000	1750000	0.7644	0.2416	0	0	1	Specific
Chr13	1750000	1800000	0.8046	0.9943	0.9679	0.9874	0.9966	va_N
Chr13	1800000	1850000	0.9645	0.9964	0.951	0.9635	0.9985	va_N
Chr13	1850000	1900000	0.9248	0.9981	0.9383	0.9217	1	va_N
Chr13	1900000	1950000	0.9278	0.9981	0.9317	0.93	1	va_N
Chr13	1950000	2000000	0.8186	0.9976	0.8011	0.8262	0.9899	va_N
Chr13	2000000	2050000	0.9837	0.9969	0.9577	0.9849	1	va_N
[truncated: 8,240 more rows]

## Sheet: S3
Table S3. Population 130 samples and informations
ID	Population	Species name	Cultivar or wild	Common name	Previous ID	Sex haplotype	Newly realesed (NR) or Previously published (PP)
Amur_DB1	Amur_DB	Vitis amurensis	Wild	wild amur grape	ZY062	MF	NR
Amur_DB2	Amur_DB	Vitis amurensis	Wild	wild amur grape	ZY064	MF	NR
Amur_DB3	Amur_DB	Vitis amurensis	Wild	wild amur grape	ZY066	MF	NR
Amur_DB4	Amur_DB	Vitis amurensis	Wild	wild amur grape	ZY069	FF	NR
Amur_DB5	Amur_DB	Vitis amurensis	Wild	wild amur grape	ZY071	MF	NR
Amur_DB6	Amur_DB	Vitis amurensis	Wild	wild amur grape	ZY073	MF	NR
Amur_DB7	Amur_DB	Vitis amurensis	Wild	wild amur grape	ZY075	MF	NR
Amur_DB8	Amur_DB	Vitis amurensis	Wild	wild amur grape	ZY077	MF	NR
Amur_DB9	Amur_DB	Vitis amurensis	Wild	wild amur grape	ZY079	FF	NR
Amur_DB10	Amur_DB	Vitis amurensis	Wild	wild amur grape	ZY082	MF	NR
Amur_DB11	Amur_DB	Vitis amurensis	Wild	wild amur grape	ZY084	MF	NR
Amur_DB12	Amur_DB	Vitis amurensis	Wild	wild amur grape	ZY086	MF	NR
Amur_DB13	Amur_DB	Vitis amurensis	Wild	wild amur grape	ZY088	MF	NR
Amur_DB14	Amur_DB	Vitis amurensis	Wild	wild amur grape	ZY090	MF	NR
Amur_DB15	Amur_DB	Vitis amurensis	Wild	wild amur grape	ZY092	MF	NR
Amur_DB16	Amur_DB	Vitis amurensis	Wild	wild amur grape	ZY094	FF	NR
Amur_DB17	Amur_DB	Vitis amurensis	Wild	wild amur grape	ZY096	FF	NR
Amur_DB18	Amur_DB	Vitis amurensis	Wild	wild amur grape	ZY100	MF	NR
Amur_DB19	Amur_DB	Vitis amurensis	Wild	wild amur grape	ZY102	MF	NR
Amur_DB20	Amur_DB	Vitis amurensis	Wild	wild amur grape	ZY104	MF	NR
Amur_HB1	Amur_HB	Vitis amurensis	Wild	wild amur grape	ZY405	MF	NR
Amur_HB2	Amur_HB	Vitis amurensis	Wild	wild amur grape	ZY406	FF	NR
Amur_HB3	Amur_HB	Vitis amurensis	Wild	wild amur grape	ZY407	FF	NR
Amur_HB4	Amur_HB	Vitis amurensis	Wild	wild amur grape	ZY408	MF	NR
Amur_HB5	Amur_HB	Vitis amurensis	Wild	wild amur grape	ZY409	FF	NR
Amur_HB6	Amur_HB	Vitis amurensis	Wild	wild amur grape	ZY410	FF	NR
Amur_HB7	Amur_HB	Vitis amurensis	Wild	wild amur grape	ZY411	MF	NR
Amur_HB8	Amur_HB	Vitis amurensis	Wild	wild amur grape	ZY414	FF	NR
Amur_HB9	Amur_HB	Vitis amurensis	Wild	wild amur grape	ZY415	FF	NR
Amur_HB10	Amur_HB	Vitis amurensis	Wild	wild amur grape	ZY416	FF	NR
Amur_XB1	Amur_XB	Vitis amurensis	Wild	wild amur grape	ZY604	MF	NR
Amur_XB2	Amur_XB	Vitis amurensis	Wild	wild amur grape	ZY605	MF	NR
Amur_XB3	Amur_XB	Vitis amurensis	Wild	wild amur grape	ZY606	MF	NR
Amur_XB4	Amur_XB	Vitis amurensis	Wild	wild amur grape	ZY607	FF	NR
Amur_XB5	Amur_XB	Vitis amurensis	Wild	wild amur grape	ZY608	MF	NR
Amur_XB6	Amur_XB	Vitis amurensis	Wild	wild amur grape	ZY609	MF	NR
Amur_XB7	Amur_XB	Vitis amurensis	Wild	wild amur grape	ZY610	MF	NR
Amur_XB8	Amur_XB	Vitis amurensis	Wild	wild amur grape	ZY611	FF	NR
Amur_XB9	Amur_XB	Vitis amurensis	Wild	wild amur grape	ZY612	MF	NR
Amur_XB10	Amur_XB	Vitis amurensis	Wild	wild amur grape	ZY613	FF	NR
Amur_HN1	Amur_HN	Vitis amurensis	Wild	wild amur grape	ZY700	FF	NR
Amur_HN2	Amur_HN	Vitis amurensis	Wild	wild amur grape	ZY701	FF	NR
Amur_HN3	Amur_HN	Vitis amurensis	Wild	wild amur grape	ZY702	FF	NR
Amur_HN4	Amur_HN	Vitis amurensis	Wild	wild amur grape	ZY703	FF	NR
Amur_HN5	Amur_HN	Vitis amurensis	Wild	wild amur grape	ZY704	FF	NR
Amur_HN6	Amur_HN	Vitis amurensis	Wild	wild amur grape	ZY705	FF	NR
Amur_HN7	Amur_HN	Vitis amurensis	Wild	wild amur grape	ZY706	MF	NR
Amur_HN8	Amur_HN	Vitis amurensis	Wild	wild amur grape	ZY707	FF	NR
Amur_HN9	Amur_HN	Vitis amurensis	Wild	wild amur grape	ZY708	MF	NR
Amur_HN10	Amur_HN	Vitis amurensis	Wild	wild amur grape	ZY709	FF	NR
Table1	Table	Vitis vinifera cv.	Cultivated	Muscat Hamburg	VV_14	H1F	PP
Table2	Table	Vitis vinifera cv.	Cultivated	Flame Tokay	VV_142	H1H1	PP
Table3	Table	Vitis vinifera cv.	Cultivated	Aishenmeigui	VV_64	H1H1	PP
Table4	Table	Vitis vinifera cv.	Cultivated	Chasselas Rose	VV_144	H1F	PP
Table5	Table	Vitis vinifera cv.	Cultivated	Beauty Seedless	VV_158	H1F	PP
Table6	Table	Vitis vinifera cv.	Cultivated	Chasselas Rouge	VV_141	H1F	PP
Table7	Table	Vitis vinifera cv.	Cultivated	Pizzutello	VV_198	H1H1	PP
Table8	Table	Vitis vinifera cv.	Cultivated	Jingcui	VV_94	H1H1	PP
Table9	Table	Vitis vinifera cv.	Cultivated	Jingdajing	VV_95	H1F	PP
Table10	Table	Vitis vinifera cv.	Cultivated	Jingmi	VV_182	H1H1	PP
Wine1	Wine	Vitis vinifera cv.	Cultivated	Cabernet Franc	VV_2	H1F	PP
Wine2	Wine	Vitis vinifera cv.	Cultivated	Cabernet Sauvignon blanc 30	VV_7	H1F	PP (Xiao et al. 2023. 10.1073/pnas.2222041120)
Wine3	Wine	Vitis vinifera cv.	Cultivated	Cabernet Sauvignon FPS 08	VV_9	H1F	PP
Wine4	Wine	Vitis vinifera cv.	Cultivated	Cabernet Gernischet	VV_71	H1F	PP
Wine5	Wine	Vitis vinifera cv.	Cultivated	Chardonnay	VV_3	H1H1	PP
Wine6	Wine	Vitis vinifera cv.	Cultivated	Pinot Noir	VV_11	H2F	PP
Wine7	Wine	Vitis vinifera cv.	Cultivated	Merlot 37	VV_6	H1F	PP (Xiao et al. 2023. 10.1073/pnas.2222041120)
Wine8	Wine	Vitis vinifera cv.	Cultivated	Gewurztraminer	VV_4	H1F	PP
Wine9	Wine	Vitis vinifera cv.	Cultivated	Krakhuna	VV_240	H1F	PP
Wine10	Wine	Vitis vinifera cv.	Cultivated	Meskhuri_mtsvane	VV_5	H1F	PP
ME1_3	ME1	Vitis vinifera ssp. sylvestris	Wild		VSM_28	FF	PP (Xiao et al. 2023. 10.1073/pnas.2222041120)
ME1_4	ME1	Vitis vinifera ssp. sylvestris	Wild		VSM_30	FF	PP (Xiao et al. 2023. 10.1073/pnas.2222041120)
ME1_5	ME1	Vitis vinifera ssp. sylvestris	Wild		VSM_32	MF	PP (Xiao et al. 2023. 10.1073/pnas.2222041120)
ME1_6	ME1	Vitis vinifera ssp. sylvestris	Wild		VSM_34	MF	PP (Xiao et al. 2023. 10.1073/pnas.2222041120)
ME1_7	ME1	Vitis vinifera ssp. sylvestris	Wild		VSM_36	MF	PP (Xiao et al. 2023. 10.1073/pnas.2222041120)
ME1_8	ME1	Vitis vinifera ssp. sylvestris	Wild		VSM_38	FF	PP (Xiao et al. 2023. 10.1073/pnas.2222041120)
ME1_9	ME1	Vitis vinifera ssp. sylvestris	Wild		VSM_40	FF	PP (Xiao et al. 2023. 10.1073/pnas.2222041120)
ME1_10	ME1	Vitis vinifera ssp. sylvestris	Wild		VSM_42	MF	PP (Xiao et al. 2023. 10.1073/pnas.2222041120)
ME2_1	ME2	Vitis vinifera ssp. sylvestris	Wild		VSM_10	MF	PP
ME2_2	ME2	Vitis vinifera ssp. sylvestris	Wild		VSM_11	MF	PP
ME2_3	ME2	Vitis vinifera ssp. sylvestris	Wild		VSM_12	MF	PP
ME2_4	ME2	Vitis vinifera ssp. sylvestris	Wild		VSM_15	MF	PP
ME2_5	ME2	Vitis vinifera ssp. sylvestris	Wild		VSM_16	FF	PP
ME2_6	ME2	Vitis vinifera ssp. sylvestris	Wild		VSM_17	MF	PP
ME2_7	ME2	Vitis vinifera ssp. sylvestris	Wild		VSM_18	FF	PP
EU1	EU	Vitis vinifera ssp. sylvestris	Wild		VSE_20	MF	PP
EU2	EU	Vitis vinifera ssp. sylvestris	Wild		VSE_25	FF	PP
EU3	EU	Vitis vinifera ssp. sylvestris	Wild		VSE_30	MF	PP
EU4	EU	Vitis vinifera ssp. sylvestris	Wild		VSE_35	MF	PP
EU5	EU	Vitis vinifera ssp. sylvestris	Wild		VSE_40	MF	PP
EU6	EU	Vitis vinifera ssp. sylvestris	Wild		VSE_45	FF	PP
EU7	EU	Vitis vinifera ssp. sylvestris	Wild		VSE_50	FF	PP
EU8	EU	Vitis vinifera ssp. sylvestris	Wild		VSE_55	FF	PP
EU9	EU	Vitis vinifera ssp. sylvestris	Wild		VSE_60	MF	PP
EU10	EU	Vitis vinifera ssp. sylvestris	Wild		VSE_65	MF	PP
Inter1	Inter	Vitis amurensis × Vitis vinifera cv.	Cultivated	Beibinghong	Beibinghong	HaF	NR
Inter2	Inter	Vitis amurensis × Vitis vinifera cv.	Cultivated	Beimei	Beimei	H1F	NR
Inter3	Inter	Vitis amurensis × Vitis vinifera cv.	Cultivated	Gongzhubai	Gongzhubai	H1F	NR
Inter4	Inter	Vitis amurensis × Vitis vinifera cv.	Cultivated	HaSang	HaSang	H1F	NR
Inter5	Inter	Vitis amurensis × Vitis vinifera cv.	Cultivated	Zuoyouhong	s220003	HaF	NR
Inter6	Inter	Vitis amurensis × Vitis vinifera cv.	Cultivated	NO28_Gongniang1	s220006	H1F	NR
Inter7	Inter	Vitis amurensis × Vitis vinifera cv.	Cultivated	Zijingganlu	s220010	H1F	NR
Inter8	Inter	Vitis amurensis × Vitis vinifera cv.	Cultivated	Zijingmenglu	s220011	FF?	NR
Inter9	Inter	Vitis amurensis × Vitis vinifera cv.	Cultivated	Zuohong1	s220013	HaF	NR
Inter10	Inter	Vitis amurensis × Vitis vinifera cv.	Cultivated	Zuohongyi	Zuohongyi	HaF	NR
Inter11	Inter	Vitis amurensis × Vitis vinifera cv.	Cultivated	Zuoyouhong	Zuoyouhong	HaF	NR
Intra1	Intra	Vitis amurensis cv.	Cultivated	Zuoshan1	s220001	FF	NR
Intra2	Intra	Vitis amurensis cv.	Cultivated	Zuoshan2	s220002	FF	NR
Intra3	Intra	Vitis amurensis cv.	Cultivated	Shuangfeng	s220005	HaF	NR
Intra4	Intra	Vitis amurensis cv.	Cultivated	Beiguohong1	s220007	HaF	NR
Intra5	Intra	Vitis amurensis cv.	Cultivated	Shuanghong	s220008	HaF	NR
Intra6	Intra	Vitis amurensis cv.	Cultivated	Beiguozijing	s220009	HaF	NR
Intra7	Intra	Vitis amurensis cv.	Cultivated	Shuangyou	s220012	HaF	NR
Intra8	Intra	Vitis amurensis cv.	Cultivated	Beiguolan	s220014	HaF	NR
Intra9	Intra	Vitis amurensis cv.	Cultivated	SPT_8558804	SPT_8558804	HaF	NR
Intra10	Intra	Vitis amurensis cv.	Cultivated	SPT_8558805	SPT_8558805	HaF	NR
Intra11	Intra	Vitis amurensis cv.	Cultivated	SPT_8558808	SPT_8558808	HaF	NR
Intra12	Intra	Vitis amurensis cv.	Cultivated	SPT_8558810	SPT_8558810	HaF	NR
Intra13	Intra	Vitis amurensis cv.	Cultivated	SPT_8558816	SPT_8558816	HaF	NR
Intra14	Intra	Vitis amurensis cv.	Cultivated	SPT_8558825	SPT_8558825	HaF	NR
Intra15	Intra	Vitis amurensis cv.	Cultivated	SPT_86701	SPT_86701	HaF	NR
Intra16	Intra	Vitis amurensis cv.	Cultivated	SPT_86707	SPT_86707	HaF	NR
Intra17	Intra	Vitis amurensis cv.	Cultivated	SPT_86708	SPT_86708	HaF	NR
Intra18	Intra	Vitis amurensis cv.	Cultivated	SPT_86913	SPT_86913	HaF	NR
OG_1	Outgroup	Vitis rotundifolia			OG_1		PP
OG_2	Outgroup	Vitis rotundifolia			OG_2		PP
OG_3	Outgroup	Vitis rotundifolia			OG_3		PP
OG_4	Outgroup	Vitis californica			OG_4		PP
OG_5	Outgroup	Vitis californica			OG_5		PP
OG_6	Outgroup	Vitis californica			OG_6		PP

## Sheet: S4
Table S4. 155 candidate genes and functional annotationof Va_CV population
Gene_ID	Gene_name
spt_1000403	LOC100264619
spt_1001255	protein PHYLLO, chloroplastic isoform X1
spt_1002502	LOC117908075
spt_1002535	late embryogenesis abundant protein 18
spt_1002608	PREDICTED:
spt_1002768	protein ENHANCED DISEASE RESISTANCE 2like isoform X1
spt_1002800	Ploop guanosine triphosphatase YjiAlike
spt_1002801	LOC104881534
spt_1002802	unnamed
spt_1002803	unnamed
spt_1002804	transcription factor MYBA3
spt_1002880	methanol Oanthraniloyltransferase
spt_1003057	Coiledcoil domaincontaining protein 90B
spt_1003058	cytochrome P450 84A1like
spt_1003060	LOC117908909
spt_1003455	phosphatidylinositol 4kinase alpha 1 isoform X2
spt_1003716	transcription initiation factor TFIID subunit 4b
spt_1004076	Retrovirusrelated Pol polyprotein
spt_1004128	protein DMR6LIKE OXYGENASE 2like
spt_1004215	pentatricopeptide repeatcontaining protein At5g61990
spt_1004217	myosin11 isoform X1
spt_1004218	VITISV_006017
spt_1004249	UDPglucose flavonoid 3Oglucosyltransferase 3
spt_1004250	anthocyanidin 3Oglucosyltransferase 6
spt_1004254	protein SUPPRESSOR OF FRI 4like isoform X1
spt_1004316	receptorlike protein kinase HSL1 isoform X2
spt_1004317	LOC100268155
spt_1004420	protein PLASTID MOVEMENT IMPAIRED 1RELATED 1 isoform X1
spt_1004421	probable WRKY transcription factor 50
spt_1004476	pentatricopeptide repeatcontaining protein At4g33170
spt_1004477	pentatricopeptide repeatcontaining protein At4g33170
spt_1004478	endoribonuclease Dicer homolog 3a isoform X1
spt_1004760	Pleiotropic drug resistance protein 1
spt_1006906	carboxylterminalprocessing peptidase 2, chloroplastic isoform X1
spt_1006907	LOC117913804
spt_1007474	histidine protein methyltransferase 1 homolog
spt_1007625	protein ENDOSPERM DEFECTIVE 1like
spt_1007626	LOC117914507 isoform X2
spt_1007627	LOC100242452 isoform X1
spt_1007628	unnamed
spt_1008191	probable LRR receptorlike serinethreonineprotein kinase At1g05700
spt_1008192	Retrovirusrelated Pol polyprotein
spt_1008193	leucinerich repeat receptorlike protein kinase
spt_1008938	LOC117916275
spt_1008939	unnamed
spt_1009139	DNA ligase 1
spt_1009196	BTBPOZ domaincontaining protein At3g44820
spt_1009313	DEADbox ATPdependent RNA helicase 52Alike
spt_1009316	LOC117916661
spt_1009352	Protein ALP1like
spt_1009353	ubiquitinconjugating enzyme E2 variant 1D
spt_1009360	nuclear speckle splicing regulatory protein 1like
spt_1009362	probable aspartyl protease At4g16563
spt_1009363	53 exoribonuclease 3
spt_1009383	probable receptorlike protein kinase At1g49730 isoform X2
spt_1009384	methylCpGbinding domaincontaining protein 11like
spt_1010045	Retrovirusrelated Pol polyprotein
spt_1013822	LOC100241278 isoform X6
spt_1013823	secreted RxLR effector protein 161like
spt_1014455	shikimate Ohydroxycinnamoyltransferase
spt_1014745	AP2like ethyleneresponsive transcription factor At1g16060
spt_1015276	Cellulose synthaselike protein E6
spt_1015277	Cellulose synthaselike protein E6
spt_1015278	unnamed
spt_1015279	unnamed
spt_1015280	cellulose synthaselike protein E6
spt_1015602	linoleate 13Slipoxygenase 31, chloroplasticlike
spt_1015692	glutamate receptor 2.7
spt_1016369	transcription termination factor MTEF18
spt_1016370	transcription termination factor MTEF18
spt_1017547	unnamed
spt_1018035	LOC100245557 isoform X2
spt_1018036	Copia protein
spt_1018492	LOC117926463
spt_1018797	pentatricopeptide repeatcontaining protein At5g61990
spt_1019811	TBC1 domain family member 8B
spt_1020282	E3 ubiquitinprotein ligase RDUF1
spt_1020284	probable U3 small nucleolar RNAassociated protein 7
spt_1020285	probable phytol kinase 1, chloroplastic isoform X1
spt_1020471	Retrovirusrelated Pol polyprotein
spt_1020472	Retrovirusrelated Pol polyprotein
spt_1020473	VITISV_028330
spt_1020474	VITISV_018835
spt_1022351	protein AAR2 homolog isoform X2
spt_1024874	altered inheritance rate of mitochondria protein 25 isoform X2
spt_1025323	LOC100259267 isoform X2
spt_1028755	embryogenesisassociated protein EMB8 isoform X1
spt_1028910	LOC117907711 isoform X1
spt_1028911	CK203_057421
spt_1029025	53 exonuclease
spt_1029033	LOC117907591
spt_1029034	probable magnesium transporter NIPA4 isoform X2
spt_1029085	LOC117907132
spt_1029119	VITISV_008492
spt_1029121	unnamed
spt_1029122	laccase14like
spt_1029123	Retrovirusrelated Pol polyprotein
spt_1029124	Retrovirusrelated Pol polyprotein
spt_1029125	unnamed
spt_1029126	laccase14like
spt_1029133	disease resistance protein RUN1like
spt_1029134	LOC100258570
spt_1029136	VITISV_008492
spt_1029734	LOC100244724
spt_1030355	LOC100264164
spt_1030980	fasciclinlike arabinogalactan protein 1
spt_1031066	UPF0481 protein At3g47200
spt_1031067	protein DJ1 homolog Dlike
spt_1031087	Uncharacterized protein CK203_065422
spt_1031462	phenylalaninetRNA ligase, chloroplasticmitochondrial isoform X4
spt_1031463	ribonuclease H protein
spt_2001273	VITISV_017464
spt_2001382	defensin EcAMPD2
spt_2002807	methanol Oanthraniloyltransferase
spt_2003395	Transposon TX1 uncharacterized 149 kDa protein
spt_2003396	polyol transporter 1
spt_2003611	methylthioribose kinaselike
spt_2003613	Basic secretory protease
spt_2003614	VITISV_038846
spt_2004274	profilin1
spt_2006359	bifunctional 3dehydroquinate dehydrataseshikimate dehydrogenase, chloroplastic isoform X1
spt_2006360	Copia protein
spt_2008460	Retrovirusrelated Pol polyprotein
spt_2008557	Pentatricopeptide repeatcontaining protein ELI1, chloroplastic
spt_2008768	UBP1associated protein 2Alike
spt_2008894	CK203_107745
spt_2009125	protein RETICULATARELATED 1, chloroplastic
spt_2009126	VITISV_031174
spt_2010830	importin subunit beta1like
spt_2010831	salicylic acidbinding protein 2 isoform X1
spt_2011911	axial regulator YABBY 5like isoform X2
spt_2014373	Shikimate Ohydroxycinnamoyltransferase
spt_2017135	probable LRR receptorlike serinethreonineprotein kinase At4g36180 isoform X1
spt_2017136	LRR receptorlike serinethreonineprotein kinase GSO1
spt_2018024	LOC100257519
spt_2019236	Retrovirusrelated Pol polyprotein
spt_2020241	VITISV_031696
spt_2024974	CK203_111563
spt_2028831	laccase15like isoform X1
spt_2028832	unnamed
spt_2028857	VITISV_024695
spt_2028867	laccase14
spt_1004129	unnamed
spt_1031211	unnamed
spt_1004318	unnamed
spt_1031293	unnamed
spt_2001381	unnamed
spt_2009952	unnamed
spt_2010829	unnamed
spt_1002425	unnamed
spt_1018037	unnamed
spt_2003612	unnamed
spt_1020475	unnamed
spt_2015545	unnamed
spt_1004216	unnamed

## Sheet: S5
Table S5. Functional enrichment analysis in 155 candidate genes of Va_CV population
ID	Description	GeneRatio	BgRatio	pvalue	p.adjust	qvalue	geneID	Count
GO:0009833	plant-type primary cell wall biogenesis	5/105	52/22996	3.95098e-06	0.00229552	0.00209194	spt_1015276/spt_1015277/spt_1015278/spt_1015279/spt_1015280	5
GO:0006273	lagging strand elongation	3/105	11/22996	1.48618e-05	0.00431736	0.00393447	spt_1009139/spt_1007627/spt_1029025	3
GO:0006271	DNA strand elongation involved in DNA replication	3/105	19/22996	8.49882e-05	0.0117219	0.0106823	spt_1009139/spt_1007627/spt_1029025	3
GO:0022616	DNA strand elongation	3/105	19/22996	8.49882e-05	0.0117219	0.0106823	spt_1009139/spt_1007627/spt_1029025	3
GO:0030244	cellulose biosynthetic process	5/105	101/22996	0.000100877	0.0117219	0.0106823	spt_1015276/spt_1015277/spt_1015278/spt_1015279/spt_1015280	5
GO:0051274	beta-glucan biosynthetic process	5/105	111/22996	0.000157445	0.0144424	0.0131616	spt_1015276/spt_1015277/spt_1015278/spt_1015279/spt_1015280	5
GO:0009250	glucan biosynthetic process	6/105	179/22996	0.000174005	0.0144424	0.0131616	spt_1015276/spt_1015277/spt_1015278/spt_1015279/spt_1015280/spt_1018036	6
GO:0046274	lignin catabolic process	4/105	66/22996	0.00023794	0.0172804	0.0157478	spt_1029122/spt_1029126/spt_2028867/spt_2028831	4
GO:0046271	phenylpropanoid catabolic process	4/105	69/22996	0.000282431	0.0182325	0.0166155	spt_1029122/spt_1029126/spt_2028867/spt_2028831	4
GO:0000281	mitotic cytokinesis	5/105	133/22996	0.000364761	0.0199409	0.0181724	spt_1015276/spt_1015277/spt_1015278/spt_1015279/spt_1015280	5
GO:0030243	cellulose metabolic process	5/105	134/22996	0.000377538	0.0199409	0.0181724	spt_1015276/spt_1015277/spt_1015278/spt_1015279/spt_1015280	5
GO:0061640	cytoskeleton-dependent cytokinesis	5/105	144/22996	0.000524728	0.02497	0.0227555	spt_1015276/spt_1015277/spt_1015278/spt_1015279/spt_1015280	5
GO:0051273	beta-glucan metabolic process	5/105	146/22996	0.00055871	0.02497	0.0227555	spt_1015276/spt_1015277/spt_1015278/spt_1015279/spt_1015280	5
GO:0000910	cytokinesis	5/105	163/22996	0.000918355	0.0381117	0.0347318	spt_1015276/spt_1015277/spt_1015278/spt_1015279/spt_1015280	5
GO:0007349	cellularization	2/105	11/22996	0.00110567	0.0428263	0.0390282	spt_1007625/spt_1007626	2
GO:0009745	sucrose mediated signaling	2/105	12/22996	0.00132285	0.0480362	0.0437761	spt_1002803/spt_1002804	2
GO:0019187	beta-1,4-mannosyltransferase activity	5/102	42/24177	9.09796e-07	0.000106901	9.33738e-05	spt_1015276/spt_1015277/spt_1015278/spt_1015279/spt_1015280	5
GO:0051753	mannan synthase activity	5/102	42/24177	9.09796e-07	0.000106901	9.33738e-05	spt_1015276/spt_1015277/spt_1015278/spt_1015279/spt_1015280	5
GO:0000030	mannosyltransferase activity	5/102	56/24177	3.89866e-06	0.000305395	0.00026675	spt_1015276/spt_1015277/spt_1015278/spt_1015279/spt_1015280	5
GO:0016759	cellulose synthase activity	5/102	65/24177	8.18087e-06	0.000384501	0.000335846	spt_1015276/spt_1015277/spt_1015278/spt_1015279/spt_1015280	5
GO:0016760	cellulose synthase (UDP-forming) activity	5/102	65/24177	8.18087e-06	0.000384501	0.000335846	spt_1015276/spt_1015277/spt_1015278/spt_1015279/spt_1015280	5
GO:0035251	UDP-glucosyltransferase activity	8/102	258/24177	1.39341e-05	0.000545754	0.000476694	spt_1004249/spt_1004250/spt_1015276/spt_1015277/spt_1015278/spt_1015279/spt_1015280/spt_1018036	8
GO:0046527	glucosyltransferase activity	8/102	308/24177	4.92421e-05	0.00165313	0.00144394	spt_1004249/spt_1004250/spt_1015276/spt_1015277/spt_1015278/spt_1015279/spt_1015280/spt_1018036	8
GO:0052716	hydroquinone:oxygen oxidoreductase activity	4/102	65/24177	0.000165911	0.00487364	0.00425693	spt_1029122/spt_1029126/spt_2028867/spt_2028831	4
GO:0008194	UDP-glycosyltransferase activity	8/102	394/24177	0.000267808	0.00640283	0.00559262	spt_1004249/spt_1004250/spt_1015276/spt_1015277/spt_1015278/spt_1015279/spt_1015280/spt_1018036	8
GO:0008409	5'-3' exonuclease activity	3/102	30/24177	0.000272461	0.00640283	0.00559262	spt_1009363/spt_1007627/spt_1029025	3
GO:0016682	oxidoreductase activity, acting on diphenols and related substances as donors, oxygen as acceptor	4/102	94/24177	0.000680614	0.0145404	0.0127004	spt_1029122/spt_1029126/spt_2028867/spt_2028831	4
GO:0046593	mandelonitrile lyase activity	2/102	10/24177	0.000775824	0.0151932	0.0132707	spt_1002608/spt_2010831	2
GO:0017108	5'-flap endonuclease activity	2/102	12/24177	0.00113163	0.0204563	0.0178678	spt_1007627/spt_1029025	2
GO:0016679	oxidoreductase activity, acting on diphenols and related substances as donors	4/102	113/24177	0.00135192	0.022693	0.0198214	spt_1029122/spt_1029126/spt_2028867/spt_2028831	4
GO:0048256	flap endonuclease activity	2/102	14/24177	0.00155171	0.0243101	0.0212339	spt_1007627/spt_1029025	2
GO:0004826	phenylalanine-tRNA ligase activity	2/102	15/24177	0.00178551	0.0246821	0.0215588	spt_1031462/spt_1031463	2
GO:0016888	endodeoxyribonuclease activity, producing 5'-phosphomonoesters	2/102	15/24177	0.00178551	0.0246821	0.0215588	spt_1007627/spt_1029025	2

## Sheet: S6
Table S6. Myb gene cluster and PGG gene cluster
Gene_ID	Gene_name
spt_1002800	DNA (Cytosine-5)-methyltransferase CMT2-like isoform X1
spt_1002801	DUF659 domain-containing protein
spt_1002802	G-type lectin S-receptor-like serine/threonine-protein kinase
spt_1002803	Transcription factor MYB114-like isoform X2
spt_1002804	Myb-related transcription factor A3
spt_1002805	unnamed
spt_1002806	Transcription factor MYB75
spt_1002807	Anthocyanin-activating R2R3 MYB transcription factor
spt_1002808	transcription factor MYB1like
spt_1002809	transcription factor MYB113
spt_1002810	transcription factor MybA
spt_1002811	transcription factor MYB1like
spt_1002812	Retrotransposon
spt_1002813	Retrotransposon
spt_1002814	Retrotransposon
spt_1002815	transcription factor MYB113
spt_1002816	Retrotransposon
spt_1002817	Transcription factor MYB75
spt_1002818	Transcription factor MYB113
spt_1002820	Transcription factor MYBA3
spt_1002867	PGG domain
spt_1002868	PGG domain
spt_1005293	TyrosineDOPA decarboxylase 2
spt_1010282	betaxylosidasealphaLarabinofuranosidase 1
spt_1012806	Mitochondrial carrier protei
spt_1012807	E3 ubiquitinprotein ligase Hakai
spt_1012808	reticulon-like protein B12 isoform X1
spt_1012809	ataxin3 homolog
spt_1012810	OVARIAN TUMOR DOMAINcontaining deubiquitinating enzyme 3 isoform X1
spt_1012811	acetylcoenzyme A carboxylase carboxyl transferase subunit alpha, chloroplastic
spt_1012813	WD40/YVTN repeat-like-containing domain superfamily
spt_1015507	probable ADPribosylation factor GTPaseactivating protein AGD5
spt_1019806	twocomponent response regulatorlike PRR37 isoform X2
spt_2005274	TyrosineDOPA decarboxylase 2
spt_2005275	Zinc finger, SWIM-type
spt_2005276	Ulp1 protease family, C-terminal catalytic domain
spt_2005277	Ulp1 protease family, C-terminal catalytic domain
spt_2012642	steroid 5alphareductase DET2
spt_2019593	DUF4283 domain-containing protein

## Sheet: S7
Table S7. Selected Genes Mediated by Structural Variation in the Va_cv Population
Gene_ID	Gene_name	GO	KEGG
spt_1000186	probable splicing factor 3A subunit 1	GO:0000245,GO:0000375,GO:0000377,GO:0000381,GO:0000389,GO:0000398,GO:0003674,GO:0003676,GO:0003723,GO:0003735,GO:0005488,GO:0005515,GO:0005575,GO:0005622,GO:0005623,GO:0005634,GO:0005681,GO:0005684,GO:0005686,GO:0005773,GO:0006139,GO:0006376,GO:0006396,GO:0006397,GO:0006725,GO:0006807,GO:0008150,GO:0008152,GO:0008380,GO:0009987,GO:0010467,GO:0010468,GO:0016043,GO:0016070,GO:0016071,GO:0019219,GO:…	ko:K12825
spt_1000188	serine carboxypeptidaselike 35 isoform X1	GO:0003674,GO:0003824,GO:0004180,GO:0004185,GO:0005575,GO:0005576,GO:0005773,GO:0006508,GO:0006807,GO:0008150,GO:0008152,GO:0008233,GO:0008236,GO:0008238,GO:0009056,GO:0009057,GO:0009987,GO:0016787,GO:0017171,GO:0019538,GO:0030163,GO:0043170,GO:0044237,GO:0044238,GO:0044248,GO:0044257,GO:0044260,GO:0044265,GO:0044267,GO:0051603,GO:0070008,GO:0070011,GO:0071704,GO:0140096,GO:1901564,GO:1901565,GO:…	ko:K16297
spt_1000189	unnamed	-	-
spt_1000190	Cytochrome P450 86B1	GO:0000038,GO:0003674,GO:0003735,GO:0003824,GO:0004497,GO:0005488,GO:0005506,GO:0005575,GO:0005622,GO:0005623,GO:0005737,GO:0005783,GO:0005789,GO:0005840,GO:0006082,GO:0006629,GO:0006631,GO:0006633,GO:0006725,GO:0008150,GO:0008152,GO:0008610,GO:0009058,GO:0009698,GO:0009699,GO:0009987,GO:0010345,GO:0012505,GO:0016020,GO:0016021,GO:0016043,GO:0016053,GO:0016491,GO:0016705,GO:0019438,GO:0019538,GO:…	ko:K15402
spt_1000191	LOC100249303	GO:0005524,GO:0016787,GO:0140096	ko:K06950
spt_1000192	LOC104878994	GO:0003674,GO:0003735,GO:0005198,GO:0005575,GO:0005622,GO:0005623,GO:0005737,GO:0005829,GO:0005840,GO:0006412,GO:0006518,GO:0006807,GO:0008150,GO:0008152,GO:0009058,GO:0009059,GO:0009987,GO:0010467,GO:0015934,GO:0016020,GO:0019538,GO:0022625,GO:0022626,GO:0032991,GO:0034641,GO:0034645,GO:0043043,GO:0043170,GO:0043226,GO:0043228,GO:0043229,GO:0043232,GO:0043603,GO:0043604,GO:0044237,GO:0044238,GO:…	ko:K02929
spt_1000193	HS088.tW07G00373	GO:0003674,GO:0003735,GO:0005198,GO:0005575,GO:0005622,GO:0005623,GO:0005737,GO:0005829,GO:0005840,GO:0006412,GO:0006518,GO:0006807,GO:0008150,GO:0008152,GO:0009058,GO:0009059,GO:0009507,GO:0009987,GO:0010467,GO:0015934,GO:0019538,GO:0022625,GO:0022626,GO:0032991,GO:0034641,GO:0034645,GO:0043043,GO:0043170,GO:0043226,GO:0043228,GO:0043229,GO:0043232,GO:0043603,GO:0043604,GO:0044237,GO:0044238,GO:…	ko:K02929
spt_1000194	HS088.tW07G00373	GO:0003674,GO:0003735,GO:0005198,GO:0005575,GO:0005622,GO:0005623,GO:0005737,GO:0005829,GO:0005840,GO:0006412,GO:0006518,GO:0006807,GO:0008150,GO:0008152,GO:0009058,GO:0009059,GO:0009507,GO:0009987,GO:0010467,GO:0015934,GO:0019538,GO:0022625,GO:0022626,GO:0032991,GO:0034641,GO:0034645,GO:0043043,GO:0043170,GO:0043226,GO:0043228,GO:0043229,GO:0043232,GO:0043603,GO:0043604,GO:0044237,GO:0044238,GO:…	ko:K02929
spt_1000195	ATPdependent Clp protease proteolytic subunit 2	GO:0003674,GO:0003723,GO:0003824,GO:0004175,GO:0004176,GO:0004252,GO:0005488,GO:0005575,GO:0005622,GO:0005623,GO:0005737,GO:0005739,GO:0006508,GO:0006515,GO:0006807,GO:0008150,GO:0008152,GO:0008233,GO:0008236,GO:0008270,GO:0009368,GO:0009507,GO:0009532,GO:0009534,GO:0009535,GO:0009536,GO:0009570,GO:0009579,GO:0009840,GO:0009987,GO:0016020,GO:0016787,GO:0017171,GO:0019538,GO:0031976,GO:0031984,GO:…	ko:K01358
spt_1000765	Retrovirusrelated Pol polyprotein	GO:0003676,GO:0004190,GO:0008270,GO:0009987,GO:0015074	-
spt_1000766	CK203_100227	-	-
spt_1000768	Hemebinding protein 2	GO:0016020	-
spt_1000769	alphaglucan water dikinase, chloroplastic isoform X2	GO:0000166,GO:0000272,GO:0003674,GO:0003729,GO:0003824,GO:0004672,GO:0004673,GO:0005488,GO:0005524,GO:0005575,GO:0005622,GO:0005623,GO:0005737,GO:0005739,GO:0005975,GO:0005976,GO:0005982,GO:0005983,GO:0006073,GO:0006464,GO:0006468,GO:0006793,GO:0006796,GO:0006807,GO:0006950,GO:0008144,GO:0008150,GO:0008152,GO:0009056,GO:0009057,GO:0009251,GO:0009266,GO:0009409,GO:0009507,GO:0009526,GO:0009532,GO:…	ko:K08244
spt_1000770	Retrovirusrelated Pol polyprotein	GO:0003676,GO:0008270	-
spt_1001587	Transposon Ty3I GagPol polyprotein	GO:0003676,GO:0003964,GO:0004190,GO:0004519,GO:0006278,GO:0006508,GO:0015074	-
spt_1001588	VITISV_032357	GO:0003676,GO:0003964,GO:0004519,GO:0005634,GO:0006278,GO:0015074	-
spt_1001589	VITISV_031401	GO:0000977,GO:0003677,GO:0005634,GO:0045944,GO:0046983	-
spt_1002259	vacuolarprocessing enzyme	GO:0000322,GO:0000325,GO:0000326,GO:0003674,GO:0003824,GO:0004175,GO:0004197,GO:0005575,GO:0005622,GO:0005623,GO:0005737,GO:0005773,GO:0006508,GO:0006624,GO:0006807,GO:0006996,GO:0007033,GO:0008150,GO:0008152,GO:0008233,GO:0008234,GO:0009056,GO:0009057,GO:0009987,GO:0010467,GO:0016020,GO:0016043,GO:0016485,GO:0016787,GO:0019538,GO:0030163,GO:0043170,GO:0043226,GO:0043227,GO:0043229,GO:0043231,GO:…	ko:K01369
spt_1002260	auxinresponsive protein SAUR36	GO:0009733	ko:K14488
spt_1002261	NAC domaincontaining protein 7	GO:0003674,GO:0003676,GO:0003677,GO:0003700,GO:0005488,GO:0005575,GO:0005622,GO:0005623,GO:0005634,GO:0005886,GO:0006139,GO:0006351,GO:0006355,GO:0006725,GO:0006807,GO:0007275,GO:0008150,GO:0008152,GO:0009058,GO:0009059,GO:0009793,GO:0009888,GO:0009889,GO:0009987,GO:0010087,GO:0010089,GO:0010467,GO:0010468,GO:0010556,GO:0016043,GO:0016070,GO:0018130,GO:0019219,GO:0019222,GO:0019438,GO:0030154,GO:…	-
spt_1002262	thylakoid lumenal protein TL20.3, chloroplastic isoform X1	GO:0005575,GO:0005622,GO:0005623,GO:0005737,GO:0009507,GO:0009534,GO:0009535,GO:0009536,GO:0009543,GO:0009579,GO:0016020,GO:0031976,GO:0031977,GO:0031978,GO:0031984,GO:0034357,GO:0042651,GO:0043226,GO:0043227,GO:0043229,GO:0043231,GO:0044422,GO:0044424,GO:0044434,GO:0044435,GO:0044436,GO:0044444,GO:0044446,GO:0044464,GO:0055035	-
spt_1002264	thylakoid lumenal protein TL20.3, chloroplasticlike	GO:0004674,GO:0005575,GO:0005622,GO:0005623,GO:0005737,GO:0009507,GO:0009534,GO:0009535,GO:0009536,GO:0009543,GO:0009579,GO:0016020,GO:0031976,GO:0031977,GO:0031978,GO:0031984,GO:0034357,GO:0042651,GO:0043226,GO:0043227,GO:0043229,GO:0043231,GO:0044422,GO:0044424,GO:0044434,GO:0044435,GO:0044436,GO:0044444,GO:0044446,GO:0044464,GO:0055035	-
spt_1002267	LOW QUALITY PROTEIN: monocopper oxidaselike protein SKU5	GO:0000902,GO:0003674,GO:0003824,GO:0005488,GO:0005507,GO:0005575,GO:0005576,GO:0005618,GO:0005622,GO:0005623,GO:0005737,GO:0005773,GO:0005774,GO:0005886,GO:0005911,GO:0008150,GO:0008152,GO:0009505,GO:0009506,GO:0009653,GO:0009826,GO:0009932,GO:0009987,GO:0016020,GO:0016043,GO:0016049,GO:0016491,GO:0016722,GO:0030054,GO:0030312,GO:0031090,GO:0031224,GO:0031225,GO:0031226,GO:0032502,GO:0032989,GO:…	ko:K19791
spt_1002268	acid betafructofuranosidase	GO:0000139,GO:0000325,GO:0001101,GO:0003674,GO:0003824,GO:0004553,GO:0004564,GO:0004575,GO:0005575,GO:0005618,GO:0005622,GO:0005623,GO:0005737,GO:0005768,GO:0005770,GO:0005773,GO:0005774,GO:0005775,GO:0005783,GO:0005789,GO:0005794,GO:0005975,GO:0005984,GO:0005985,GO:0007154,GO:0007165,GO:0007275,GO:0008150,GO:0008152,GO:0009311,GO:0009505,GO:0009605,GO:0009607,GO:0009617,GO:0009719,GO:0009725,GO:…	ko:K01193
spt_1002422	(S)ureidoglycine aminohydrolase	GO:0000255,GO:0000256,GO:0003674,GO:0003700,GO:0003824,GO:0005488,GO:0005575,GO:0005622,GO:0005623,GO:0005737,GO:0005783,GO:0006139,GO:0006144,GO:0006145,GO:0006355,GO:0006725,GO:0006807,GO:0008150,GO:0008152,GO:0009056,GO:0009112,GO:0009889,GO:0009987,GO:0010135,GO:0010136,GO:0010468,GO:0010556,GO:0012505,GO:0016020,GO:0016787,GO:0016810,GO:0016813,GO:0017144,GO:0019219,GO:0019222,GO:0019439,GO:…	ko:K14977
spt_1002423	cationic amino acid transporter 6, chloroplasticlike	GO:0003333,GO:0003674,GO:0005215,GO:0005342,GO:0005575,GO:0005622,GO:0005623,GO:0005737,GO:0005886,GO:0006810,GO:0006811,GO:0006820,GO:0006865,GO:0008150,GO:0008509,GO:0008514,GO:0009507,GO:0009526,GO:0009536,GO:0009605,GO:0009607,GO:0009624,GO:0009941,GO:0015075,GO:0015171,GO:0015318,GO:0015711,GO:0015849,GO:0016020,GO:0016021,GO:0022857,GO:0031090,GO:0031224,GO:0031967,GO:0031969,GO:0031975,GO:…	ko:K03294,ko:K13864,ko:K13865,ko:K13866
spt_1002424	protein FIP2	GO:0000976,GO:0005575,GO:0005622,GO:0005623,GO:0005634,GO:0005737,GO:0005773,GO:0043226,GO:0043227,GO:0043229,GO:0043231,GO:0044424,GO:0044444,GO:0044464	-
spt_1002426	LOC104878515	GO:0016020	-
spt_1002427	LOC100251487	GO:0003676,GO:0003849,GO:0004518,GO:0006281,GO:0008652,GO:0009073,GO:0009423,GO:0009507,GO:0016020	ko:K01626
spt_1002428	DNA repair endonuclease UVH1	GO:0000003,GO:0000014,GO:0000109,GO:0000110,GO:0000280,GO:0000712,GO:0000720,GO:0000724,GO:0000725,GO:0003674,GO:0003676,GO:0003677,GO:0003684,GO:0003697,GO:0003755,GO:0003824,GO:0004518,GO:0004519,GO:0004520,GO:0004536,GO:0005488,GO:0005575,GO:0005622,GO:0005623,GO:0005634,GO:0006139,GO:0006259,GO:0006281,GO:0006289,GO:0006296,GO:0006302,GO:0006310,GO:0006725,GO:0006807,GO:0006950,GO:0006974,GO:…	ko:K10848
spt_1002429	CK203_101833	GO:0000413,GO:0003755,GO:0016020	-
spt_1002430	LOC104882172	-	-
spt_1002431	LOC117934509	GO:0008289,GO:0016020,GO:0016874	-
spt_1002880	methanol Oanthraniloyltransferase	GO:0009836	ko:K19861
spt_1003664	ACT domaincontaining protein ACR6 isoform X1	GO:0003674,GO:0003824,GO:0005488,GO:0005515,GO:0006355,GO:0006464,GO:0006807,GO:0006808,GO:0007154,GO:0007584,GO:0008150,GO:0008152,GO:0008773,GO:0009399,GO:0009507,GO:0009605,GO:0009719,GO:0009889,GO:0009891,GO:0009893,GO:0009987,GO:0009991,GO:0010033,GO:0010243,GO:0010468,GO:0010556,GO:0010557,GO:0010604,GO:0010628,GO:0016597,GO:0016740,GO:0016772,GO:0016779,GO:0016787,GO:0018175,GO:0018177,GO:…	-
spt_1003665	-	GO:0003674,GO:0003824,GO:0005488,GO:0006355,GO:0006464,GO:0006807,GO:0006808,GO:0007154,GO:0007584,GO:0008150,GO:0008152,GO:0008773,GO:0009399,GO:0009605,GO:0009719,GO:0009889,GO:0009891,GO:0009893,GO:0009987,GO:0009991,GO:0010033,GO:0010243,GO:0010468,GO:0010556,GO:0010557,GO:0010604,GO:0010628,GO:0016597,GO:0016740,GO:0016772,GO:0016779,GO:0016787,GO:0018175,GO:0018177,GO:0019219,GO:0019222,GO:…	-
spt_1003671	VITISV_038845	GO:0006508,GO:0008233,GO:0009987	-
spt_1003756	myosin10 isoform X1	GO:0000786,GO:0003690,GO:0005730,GO:0006334,GO:0016020,GO:0043565	-
spt_1003757	ribonuclease H protein	-	-
spt_1003758	telomere repeatbinding factor 1	GO:0000228,GO:0000723,GO:0000781,GO:0000784,GO:0000785,GO:0000786,GO:0000976,GO:0001101,GO:0003674,GO:0003676,GO:0003677,GO:0003682,GO:0003690,GO:0003691,GO:0003697,GO:0003700,GO:0005488,GO:0005515,GO:0005575,GO:0005622,GO:0005623,GO:0005634,GO:0005694,GO:0005730,GO:0006139,GO:0006259,GO:0006323,GO:0006325,GO:0006333,GO:0006334,GO:0006351,GO:0006355,GO:0006357,GO:0006725,GO:0006807,GO:0006950,GO:…	ko:K09422
spt_1003759	CK203_046252	GO:0000123,GO:0002576,GO:0003674,GO:0005488,GO:0005575,GO:0005576,GO:0005622,GO:0005623,GO:0005634,GO:0005654,GO:0005737,GO:0005829,GO:0006325,GO:0006464,GO:0006473,GO:0006475,GO:0006807,GO:0006810,GO:0006887,GO:0006996,GO:0008150,GO:0008152,GO:0009987,GO:0016043,GO:0016192,GO:0016569,GO:0016570,GO:0016573,GO:0018193,GO:0018205,GO:0018393,GO:0018394,GO:0019538,GO:0031248,GO:0031974,GO:0031981,GO:…	ko:K22184
spt_1003933	MADSbox transcription factor 23like isoform X1	GO:0000976,GO:0000977,GO:0000981,GO:0000987,GO:0001012,GO:0001067,GO:0003674,GO:0003676,GO:0003677,GO:0003690,GO:0003700,GO:0005488,GO:0005515,GO:0005575,GO:0005622,GO:0005623,GO:0005634,GO:0006139,GO:0006351,GO:0006355,GO:0006357,GO:0006725,GO:0006807,GO:0008150,GO:0008152,GO:0009058,GO:0009059,GO:0009889,GO:0009891,GO:0009893,GO:0009987,GO:0010467,GO:0010468,GO:0010556,GO:0010557,GO:0010604,GO:…	ko:K09264
spt_1004072	Feruloyl CoA orthohydroxylase 1	GO:0003674,GO:0003824,GO:0005488,GO:0008150,GO:0008152,GO:0009058,GO:0009987,GO:0016491,GO:0016705,GO:0016706,GO:0043167,GO:0043169,GO:0046872,GO:0051213,GO:0055114	ko:K06892
spt_1004073	LOC100852691	GO:0016020	-
spt_1004128	protein DMR6LIKE OXYGENASE 2like	GO:0002238,GO:0003674,GO:0003824,GO:0005488,GO:0008150,GO:0008152,GO:0009805,GO:0009987,GO:0016491,GO:0016706,GO:0016740,GO:0043167,GO:0043169,GO:0046872,GO:0051213,GO:0055114	-
spt_1004214	scarecrowlike protein 23	GO:0001708,GO:0003674,GO:0003676,GO:0003677,GO:0003700,GO:0005488,GO:0005575,GO:0005622,GO:0005623,GO:0005634,GO:0006139,GO:0006351,GO:0006355,GO:0006725,GO:0006807,GO:0007275,GO:0008150,GO:0008152,GO:0009058,GO:0009059,GO:0009610,GO:0009889,GO:0009987,GO:0010467,GO:0010468,GO:0010556,GO:0016070,GO:0018130,GO:0019219,GO:0019222,GO:0019438,GO:0030154,GO:0031323,GO:0031326,GO:0032501,GO:0032502,GO:…	-
spt_1004215	pentatricopeptide repeatcontaining protein At5g61990	GO:0003674,GO:0003676,GO:0003723,GO:0003727,GO:0003729,GO:0003735,GO:0003824,GO:0004518,GO:0004519,GO:0005488,GO:0005515,GO:0005575,GO:0005622,GO:0005623,GO:0005737,GO:0005739,GO:0005783,GO:0006139,GO:0006396,GO:0006725,GO:0006807,GO:0007005,GO:0008150,GO:0008152,GO:0009451,GO:0009507,GO:0009734,GO:0009793,GO:0009987,GO:0010019,GO:0016020,GO:0016070,GO:0016554,GO:0016787,GO:0016788,GO:0022626,GO:…	ko:K00928,ko:K17964
spt_1004217	myosin11 isoform X1	GO:0000160,GO:0016020	ko:K20283
spt_1004218	VITISV_006017	GO:0016020	-
spt_1004219	Heat shock protein 902	GO:0005524,GO:0005694,GO:0006457,GO:0016887,GO:0051082,GO:0120293,GO:0140662	ko:K04079
spt_1004220	-	GO:0003674,GO:0003824,GO:0004497,GO:0005488,GO:0005506,GO:0005575,GO:0005622,GO:0005623,GO:0005737,GO:0005783,GO:0005789,GO:0008150,GO:0008152,GO:0009058,GO:0009719,GO:0009725,GO:0009733,GO:0009812,GO:0009813,GO:0010033,GO:0012505,GO:0016020,GO:0016021,GO:0016491,GO:0016705,GO:0016709,GO:0016711,GO:0019748,GO:0020037,GO:0031224,GO:0031984,GO:0042175,GO:0042221,GO:0043167,GO:0043169,GO:0043226,GO:…	ko:K05280
spt_1004756	pleiotropic drug resistance protein 1like	GO:0000166,GO:0003674,GO:0003824,GO:0005488,GO:0005524,GO:0005575,GO:0005774,GO:0005886,GO:0006810,GO:0008144,GO:0009506,GO:0009507,GO:0014035,GO:0016020,GO:0016021,GO:0016462,GO:0016787,GO:0016817,GO:0016818,GO:0016887,GO:0017076,GO:0017111,GO:0030554,GO:0031224,GO:0032553,GO:0032555,GO:0032559,GO:0035639,GO:0036094,GO:0043167,GO:0043168,GO:0044425,GO:0055085,GO:0097159,GO:0097367,GO:0140359,GO:…	-
spt_1004759	CK203_052755	GO:0046983	-
spt_1004760	Pleiotropic drug resistance protein 1	GO:0000166,GO:0003674,GO:0003824,GO:0005488,GO:0005524,GO:0005575,GO:0005774,GO:0005886,GO:0006810,GO:0008144,GO:0009506,GO:0009507,GO:0014035,GO:0016020,GO:0016021,GO:0016462,GO:0016787,GO:0016817,GO:0016818,GO:0016887,GO:0017076,GO:0017111,GO:0030554,GO:0031224,GO:0032553,GO:0032555,GO:0032559,GO:0035639,GO:0036094,GO:0043167,GO:0043168,GO:0044425,GO:0055085,GO:0097159,GO:0097367,GO:0140359,GO:…	-
spt_1005043	CK203_110445	-	-
spt_1005044	CK203_053196	GO:0006508	-
spt_1005045	unnamed	GO:0001101,GO:0003674,GO:0004888,GO:0004930,GO:0004970,GO:0005215,GO:0005216,GO:0005230,GO:0005261,GO:0005262,GO:0005575,GO:0005622,GO:0005623,GO:0005737,GO:0005773,GO:0005886,GO:0006810,GO:0006811,GO:0006812,GO:0006816,GO:0007154,GO:0007165,GO:0007166,GO:0007186,GO:0007215,GO:0008066,GO:0008150,GO:0008324,GO:0009719,GO:0009987,GO:0010033,GO:0010243,GO:0015075,GO:0015085,GO:0015267,GO:0015276,GO:…	ko:K05387
spt_1005152	CK203_104956	-	-
spt_1005153	Retrovirusrelated Pol polyprotein	-	-
spt_1005154	-	GO:0003676,GO:0004523,GO:0009987,GO:0015074	-
spt_1005172	VITISV_008465	GO:0003676,GO:0003964,GO:0004519,GO:0006278,GO:0015074,GO:0016020	-
spt_1005173	VITISV_030855	GO:0003964,GO:0004190,GO:0004519,GO:0006278,GO:0016020	-
spt_1005174	Retrovirusrelated Pol polyprotein	-	-
spt_1005853	trihelix transcription factor GT2	GO:0003674,GO:0003676,GO:0003677,GO:0003700,GO:0005488,GO:0005575,GO:0005622,GO:0005623,GO:0005634,GO:0006139,GO:0006351,GO:0006355,GO:0006725,GO:0006807,GO:0008150,GO:0008152,GO:0009058,GO:0009059,GO:0009889,GO:0009987,GO:0010467,GO:0010468,GO:0010556,GO:0016070,GO:0018130,GO:0019219,GO:0019222,GO:0019438,GO:0031323,GO:0031326,GO:0032774,GO:0034641,GO:0034645,GO:0034654,GO:0043170,GO:0043226,GO:…	-
spt_1005854	protein BOLA2 isoform X2	GO:0005575,GO:0005622,GO:0005623,GO:0005634,GO:0005737,GO:0005829,GO:0006879,GO:0006950,GO:0006979,GO:0008150,GO:0010035,GO:0010038,GO:0010039,GO:0016020,GO:0042221,GO:0043226,GO:0043227,GO:0043229,GO:0043231,GO:0044424,GO:0044444,GO:0044464,GO:0050896,GO:0051537,GO:0097428	-
spt_1005855	probable plastidlipidassociated protein 7, chloroplastic	GO:0005575,GO:0005622,GO:0005623,GO:0005737,GO:0006732,GO:0008150,GO:0008152,GO:0009058,GO:0009108,GO:0009507,GO:0009532,GO:0009536,GO:0009570,GO:0009987,GO:0010236,GO:0042180,GO:0042181,GO:0043226,GO:0043227,GO:0043229,GO:0043231,GO:0044237,GO:0044249,GO:0044281,GO:0044283,GO:0044422,GO:0044424,GO:0044434,GO:0044435,GO:0044444,GO:0044446,GO:0044464,GO:0051186,GO:0051188,GO:0071704,GO:1901576,GO:…	-
spt_1005862	RINGH2 finger protein ATL78	GO:0003674,GO:0003824,GO:0004842,GO:0005488,GO:0005575,GO:0006464,GO:0006508,GO:0006511,GO:0006807,GO:0008150,GO:0008152,GO:0008270,GO:0009056,GO:0009057,GO:0009987,GO:0010498,GO:0016020,GO:0016021,GO:0016567,GO:0016740,GO:0019538,GO:0019787,GO:0019941,GO:0030163,GO:0031224,GO:0032446,GO:0036211,GO:0043161,GO:0043167,GO:0043169,GO:0043170,GO:0043412,GO:0043632,GO:0044237,GO:0044238,GO:0044248,GO:…	ko:K19040
spt_1007199	pentatricopeptide repeatcontaining protein At1g04840	GO:0003674,GO:0003676,GO:0003723,GO:0003727,GO:0003735,GO:0003824,GO:0004518,GO:0004519,GO:0005488,GO:0005515,GO:0005575,GO:0005622,GO:0005623,GO:0005739,GO:0005783,GO:0006139,GO:0006725,GO:0006807,GO:0008150,GO:0008152,GO:0008270,GO:0009451,GO:0009507,GO:0009793,GO:0009987,GO:0016070,GO:0016554,GO:0016787,GO:0016788,GO:0022626,GO:0034641,GO:0043167,GO:0043169,GO:0043170,GO:0043226,GO:0043227,GO:…	-
spt_1007200	probable sucrosephosphate synthase 3 isoform X1	GO:0003674,GO:0003824,GO:0005575,GO:0005622,GO:0005623,GO:0005737,GO:0005783,GO:0005794,GO:0005975,GO:0005984,GO:0005985,GO:0005986,GO:0008150,GO:0008152,GO:0008194,GO:0009058,GO:0009311,GO:0009312,GO:0009987,GO:0012505,GO:0016051,GO:0016157,GO:0016740,GO:0016757,GO:0016758,GO:0034637,GO:0035251,GO:0043226,GO:0043227,GO:0043229,GO:0043231,GO:0044237,GO:0044238,GO:0044249,GO:0044262,GO:0044424,GO:…	ko:K00696
spt_1007209	melanomaassociated antigen 8 isoform X2	GO:0005634	-
spt_1007210	actinrelated protein 23 complex subunit 4	GO:0003674,GO:0003779,GO:0005488,GO:0005515,GO:0005575,GO:0005622,GO:0005623,GO:0005737,GO:0005829,GO:0005856,GO:0005885,GO:0005938,GO:0006810,GO:0006887,GO:0006897,GO:0006909,GO:0006996,GO:0007010,GO:0007015,GO:0008064,GO:0008092,GO:0008150,GO:0008154,GO:0009987,GO:0010638,GO:0012506,GO:0015629,GO:0016020,GO:0016043,GO:0016192,GO:0022607,GO:0030029,GO:0030036,GO:0030041,GO:0030139,GO:0030175,GO:…	ko:K05755
spt_1007211	CK203_113437	GO:0016020	ko:K00512
spt_1007410	ribonuclease H protein	GO:0016020	-
spt_1007412	Retrovirusrelated Pol polyprotein	-	-
spt_1008048	cytokinin riboside 5monophosphate phosphoribohydrolase LOG1 isoform X1	GO:0003674,GO:0003824,GO:0005575,GO:0005622,GO:0005623,GO:0005634,GO:0005737,GO:0005829,GO:0006725,GO:0006807,GO:0008150,GO:0008152,GO:0009058,GO:0009308,GO:0009690,GO:0009691,GO:0009987,GO:0010817,GO:0016787,GO:0016799,GO:0034754,GO:0042445,GO:0042446,GO:0043226,GO:0043227,GO:0043229,GO:0043231,GO:0044237,GO:0044249,GO:0044424,GO:0044444,GO:0044464,GO:0046483,GO:0065007,GO:0065008,GO:0071704,GO:…	-
spt_1008049	LOC117916757	GO:0005829,GO:0009691,GO:0016020,GO:0016740,GO:0016787	-
spt_1008051	LOC100267242 isoform X1	GO:0016020	-
spt_1008052	UDPxylose transporter 1	GO:0000139,GO:0003674,GO:0005215,GO:0005338,GO:0005464,GO:0005575,GO:0005622,GO:0005623,GO:0005737,GO:0005783,GO:0005789,GO:0005794,GO:0006810,GO:0006811,GO:0006820,GO:0008150,GO:0008509,GO:0008514,GO:0008643,GO:0012505,GO:0015075,GO:0015165,GO:0015291,GO:0015297,GO:0015711,GO:0015780,GO:0015790,GO:0015931,GO:0015932,GO:0016020,GO:0016021,GO:0022804,GO:0022857,GO:0031090,GO:0031224,GO:0031984,GO:…	ko:K15285
spt_1008852	LOC100244396 isoform X1	GO:0000166,GO:0003674,GO:0003824,GO:0004072,GO:0004412,GO:0005488,GO:0005524,GO:0006082,GO:0006520,GO:0006553,GO:0006566,GO:0006793,GO:0006796,GO:0006807,GO:0008144,GO:0008150,GO:0008152,GO:0008652,GO:0009058,GO:0009066,GO:0009067,GO:0009085,GO:0009086,GO:0009088,GO:0009089,GO:0009987,GO:0016053,GO:0016301,GO:0016310,GO:0016491,GO:0016614,GO:0016616,GO:0016740,GO:0016772,GO:0016774,GO:0017076,GO:…	-
spt_1009089	Ploop NTPase domaincontaining protein LPA1 homolog 2	GO:0005694,GO:0005737,GO:0005829,GO:0006066,GO:0006793,GO:0006796,GO:0006810,GO:0008150,GO:0008152,GO:0009058,GO:0009987,GO:0010264,GO:0016020,GO:0016301,GO:0016787,GO:0017144,GO:0019637,GO:0019751,GO:0032958,GO:0033517,GO:0043647,GO:0044237,GO:0044281,GO:0044283,GO:0046165,GO:0046173,GO:0071704,GO:0090407,GO:0140657,GO:1901576,GO:1901615,GO:1901617	ko:K05715
spt_1009196	BTBPOZ domaincontaining protein At3g44820	GO:0005515,GO:0005634,GO:0006464,GO:0006807,GO:0006811,GO:0008150,GO:0008152,GO:0009987,GO:0012505,GO:0016567,GO:0016831,GO:0019538,GO:0032446,GO:0036211,GO:0042742,GO:0043170,GO:0043412,GO:0044237,GO:0044238,GO:0044260,GO:0044267,GO:0070647,GO:0071704,GO:1901564	-
spt_1009199	AP2 complex subunit alpha1	GO:0003674,GO:0005488,GO:0005515,GO:0005575,GO:0005622,GO:0005623,GO:0005737,GO:0005794,GO:0005886,GO:0005905,GO:0006810,GO:0006886,GO:0006897,GO:0006898,GO:0008104,GO:0008150,GO:0008289,GO:0009506,GO:0012505,GO:0015031,GO:0015833,GO:0016020,GO:0016192,GO:0030117,GO:0030118,GO:0030119,GO:0030122,GO:0030131,GO:0030276,GO:0030674,GO:0032991,GO:0033036,GO:0034613,GO:0035615,GO:0038024,GO:0042886,GO:…	ko:K11824
spt_1009309	CK203_043541	-	-
spt_1009310	unnamed	GO:0003723	-
spt_1009312	VITISV_025956	-	-
spt_1009313	DEADbox ATPdependent RNA helicase 52Alike	GO:0016020	-
spt_1009314	LOC104879732	-	-
spt_1009315	LOC100246820	GO:0016020	-
spt_1009894	transcription factor UPBEAT1	GO:0003674,GO:0003676,GO:0003677,GO:0003700,GO:0005488,GO:0005515,GO:0005575,GO:0005622,GO:0005623,GO:0005634,GO:0006139,GO:0006351,GO:0006355,GO:0006725,GO:0006807,GO:0008150,GO:0008152,GO:0009058,GO:0009059,GO:0009889,GO:0009987,GO:0010467,GO:0010468,GO:0010556,GO:0016070,GO:0018130,GO:0019219,GO:0019222,GO:0019438,GO:0030154,GO:0031323,GO:0031326,GO:0032502,GO:0032774,GO:0034641,GO:0034645,GO:…	-
spt_1009895	probable WRKY transcription factor 23	GO:0003674,GO:0003676,GO:0003677,GO:0003700,GO:0005488,GO:0005515,GO:0005575,GO:0005622,GO:0005623,GO:0005634,GO:0006139,GO:0006351,GO:0006355,GO:0006725,GO:0006807,GO:0008150,GO:0008152,GO:0009058,GO:0009059,GO:0009605,GO:0009607,GO:0009624,GO:0009719,GO:0009725,GO:0009733,GO:0009889,GO:0009987,GO:0010033,GO:0010467,GO:0010468,GO:0010556,GO:0016070,GO:0018130,GO:0019219,GO:0019222,GO:0019438,GO:…	-
spt_1009896	flowering time control protein FCAlike	GO:0003676,GO:0003723,GO:0005515,GO:0005634,GO:0005730,GO:0005737,GO:0005829,GO:0009735,GO:0010445,GO:0016020,GO:1990904	ko:K13207
spt_1009897	CK203_068231	GO:0003676,GO:0006139,GO:0008270,GO:0008408,GO:0009987,GO:0016746	-
spt_1009899	LOC104879840	GO:0003674,GO:0003676,GO:0003677,GO:0003824,GO:0004518,GO:0004527,GO:0005488,GO:0005575,GO:0005622,GO:0005623,GO:0005634,GO:0005737,GO:0006139,GO:0006725,GO:0006807,GO:0008150,GO:0008152,GO:0008408,GO:0009987,GO:0016787,GO:0016788,GO:0034641,GO:0043167,GO:0043169,GO:0043170,GO:0043226,GO:0043227,GO:0043229,GO:0043231,GO:0044237,GO:0044238,GO:0044424,GO:0044464,GO:0046483,GO:0046872,GO:0071704,GO:…	ko:K20777
spt_1009900	Werner Syndromelike exonuclease	GO:0003676,GO:0005515,GO:0005634,GO:0005737,GO:0006139,GO:0008297,GO:0008408,GO:0009987,GO:0016020,GO:0043170	-
spt_1009901	LOC104879799 isoform X1	GO:0016020	-
spt_1010978	unnamed	GO:0003674,GO:0003824,GO:0005886,GO:0009694,GO:0009696,GO:0009793,GO:0016020,GO:0016787,GO:0016788,GO:0050529,GO:0051723,GO:0052689,GO:0080030,GO:0080031,GO:0080032,GO:0106435	-
spt_1010979	Salicylic acidbinding protein 2	GO:0003674,GO:0003824,GO:0005886,GO:0009694,GO:0009793,GO:0016787,GO:0016788,GO:0052689	-
spt_1010980	methylesterase 10like	GO:0003674,GO:0003824,GO:0005886,GO:0009694,GO:0009696,GO:0009793,GO:0016020,GO:0016746,GO:0016787,GO:0016788,GO:0052689,GO:0080030,GO:0080031,GO:0080032	-
spt_1011300	LOC117918736 isoform X1	GO:0004553,GO:0005975,GO:0009987,GO:0016020,GO:0016301	-
spt_1011301	protein SHORTROOT	GO:0003002,GO:0003674,GO:0003676,GO:0003677,GO:0003700,GO:0005488,GO:0005575,GO:0005622,GO:0005623,GO:0005634,GO:0005737,GO:0005768,GO:0005769,GO:0005770,GO:0006139,GO:0006351,GO:0006355,GO:0006725,GO:0006807,GO:0007275,GO:0007346,GO:0007389,GO:0008150,GO:0008152,GO:0008356,GO:0009058,GO:0009059,GO:0009889,GO:0009956,GO:0009987,GO:0010467,GO:0010468,GO:0010556,GO:0010817,GO:0012505,GO:0016020,GO:…	-
spt_1011305	BTBPOZ domaincontaining protein At3g49900	GO:0005515,GO:0006464,GO:0006807,GO:0008150,GO:0008152,GO:0009987,GO:0016567,GO:0019538,GO:0032446,GO:0036211,GO:0042742,GO:0043170,GO:0043412,GO:0044237,GO:0044238,GO:0044260,GO:0044267,GO:0070647,GO:0071704,GO:1901564	-
spt_1011306	60S ribosomal protein L261	GO:0002181,GO:0003674,GO:0003676,GO:0003723,GO:0003729,GO:0003735,GO:0005198,GO:0005488,GO:0005575,GO:0005622,GO:0005623,GO:0005634,GO:0005730,GO:0005737,GO:0005773,GO:0005774,GO:0005829,GO:0005840,GO:0005844,GO:0005886,GO:0006412,GO:0006518,GO:0006807,GO:0006950,GO:0008150,GO:0008152,GO:0009058,GO:0009059,GO:0009266,GO:0009409,GO:0009507,GO:0009536,GO:0009628,GO:0009987,GO:0010467,GO:0015934,GO:…	ko:K02898
spt_1011371	isoflavone 3hydroxylase	GO:0004497,GO:0005506,GO:0009058,GO:0009987,GO:0016020,GO:0016705,GO:0020037	ko:K00512,ko:K13260,ko:K20623
spt_1011372	unnamed	GO:0004497,GO:0005506,GO:0016020,GO:0016705,GO:0020037	ko:K00512,ko:K13260,ko:K20623
spt_1011374	cytochrome P450 81Q32like	GO:0004497,GO:0005506,GO:0016705,GO:0020037	ko:K00512,ko:K13260,ko:K20623
spt_1011375	cytochrome P450 81Q32like	GO:0004497,GO:0005506,GO:0016020,GO:0016705,GO:0020037	ko:K00512,ko:K13260,ko:K20623
spt_1011587	crossover junction endonuclease EME1Blike isoform X2	GO:0000003,GO:0003674,GO:0003676,GO:0003677,GO:0003824,GO:0004518,GO:0004519,GO:0005488,GO:0005575,GO:0005622,GO:0005623,GO:0005634,GO:0006139,GO:0006259,GO:0006281,GO:0006310,GO:0006725,GO:0006807,GO:0006950,GO:0006974,GO:0007049,GO:0008150,GO:0008152,GO:0009314,GO:0009411,GO:0009416,GO:0009628,GO:0009642,GO:0009644,GO:0009987,GO:0010212,GO:0010332,GO:0016787,GO:0016788,GO:0022414,GO:0032991,GO:…	ko:K10882
spt_1011588	VITISV_030491	-	-
spt_1011589	probable serinethreonineprotein kinase At1g54610 isoform X2	GO:0000166,GO:0000307,GO:0002215,GO:0003674,GO:0003824,GO:0004672,GO:0004674,GO:0004693,GO:0005488,GO:0005515,GO:0005524,GO:0005575,GO:0005622,GO:0005623,GO:0005634,GO:0005730,GO:0005886,GO:0006464,GO:0006468,GO:0006793,GO:0006796,GO:0006807,GO:0008144,GO:0008150,GO:0008152,GO:0008353,GO:0009987,GO:0016020,GO:0016301,GO:0016310,GO:0016740,GO:0016772,GO:0016773,GO:0017076,GO:0019538,GO:0030554,GO:…	ko:K08819
spt_1011590	TSLkinase interacting protein 1 isoform X4	GO:0003682,GO:0005634,GO:0007389,GO:0016301	ko:K02150
spt_1011591	VITISV_030494	GO:0016746	-
spt_1011649	LOC104879936 isoform X1	-	-
spt_1011650	LOC100853376	-	-
spt_1011651	protein ALTERED PHOSPHATE STARVATION RESPONSE 1 isoform X1	-	-
spt_1011652	VITISV_026049	GO:0003674,GO:0003735,GO:0003824,GO:0004553,GO:0004650,GO:0005575,GO:0005839,GO:0005975,GO:0008150,GO:0008152,GO:0016020,GO:0016021,GO:0016787,GO:0016798,GO:0031224,GO:0044238,GO:0044425,GO:0051603,GO:0071704	-
spt_1011654	Protein FAR1related sequence 5	GO:0003676,GO:0003677,GO:0003700,GO:0004803,GO:0005634,GO:0006313,GO:0006355,GO:0008270,GO:0043565	ko:K17604
spt_1012081	Retrovirusrelated Pol polyprotein	GO:0003964,GO:0004190,GO:0004519,GO:0006278	-
spt_1012250	protein DETOXIFICATION 44, chloroplastic	GO:0003674,GO:0005215,GO:0005575,GO:0005622,GO:0005623,GO:0005737,GO:0006810,GO:0006855,GO:0008150,GO:0009507,GO:0009526,GO:0009536,GO:0009941,GO:0015238,GO:0015291,GO:0015297,GO:0015893,GO:0016020,GO:0016021,GO:0022804,GO:0022857,GO:0031090,GO:0031224,GO:0031967,GO:0031969,GO:0031975,GO:0042170,GO:0042221,GO:0042493,GO:0042908,GO:0042910,GO:0043226,GO:0043227,GO:0043229,GO:0043231,GO:0044422,GO:…	ko:K20359
spt_1012251	Dehydrationresponsive elementbinding protein 2A	GO:0000976,GO:0001067,GO:0001101,GO:0003674,GO:0003676,GO:0003677,GO:0003700,GO:0005488,GO:0005575,GO:0005622,GO:0005623,GO:0005634,GO:0006139,GO:0006351,GO:0006355,GO:0006725,GO:0006807,GO:0006950,GO:0006970,GO:0007154,GO:0007165,GO:0008150,GO:0008152,GO:0009058,GO:0009059,GO:0009266,GO:0009408,GO:0009414,GO:0009415,GO:0009628,GO:0009651,GO:0009719,GO:0009725,GO:0009737,GO:0009738,GO:0009755,GO:…	-
spt_1012482	TSLkinase interacting protein 1 isoform X1	GO:0003674,GO:0003676,GO:0003677,GO:0003682,GO:0005488,GO:0005575,GO:0005622,GO:0005623,GO:0005634,GO:0006139,GO:0006351,GO:0006355,GO:0006725,GO:0006807,GO:0007389,GO:0008150,GO:0008152,GO:0009058,GO:0009059,GO:0009736,GO:0009889,GO:0009987,GO:0010026,GO:0010467,GO:0010468,GO:0010556,GO:0016070,GO:0016301,GO:0018130,GO:0019219,GO:0019222,GO:0019438,GO:0031323,GO:0031326,GO:0032774,GO:0034641,GO:…	-
spt_1012483	UDPglycosyltransferase 86A1	GO:0003674,GO:0003824,GO:0005575,GO:0005622,GO:0005623,GO:0008150,GO:0008152,GO:0008194,GO:0008483,GO:0009718,GO:0009987,GO:0016740,GO:0016757,GO:0016758,GO:0035251,GO:0043226,GO:0043227,GO:0043229,GO:0043231,GO:0044424,GO:0044464,GO:0046527,GO:0047213,GO:0080043,GO:0080044	-
spt_1012484	cell division cycle protein 48 homolog	GO:0000166,GO:0003674,GO:0003824,GO:0005488,GO:0005524,GO:0005575,GO:0005622,GO:0005623,GO:0005634,GO:0005654,GO:0005694,GO:0005730,GO:0005737,GO:0005739,GO:0005794,GO:0005829,GO:0005856,GO:0005886,GO:0006281,GO:0006310,GO:0006810,GO:0007049,GO:0008104,GO:0008144,GO:0008150,GO:0009378,GO:0009507,GO:0009524,GO:0009893,GO:0009894,GO:0009896,GO:0009987,GO:0010035,GO:0010038,GO:0010604,GO:0012505,GO:…	ko:K13525
spt_1012485	high affinity nitrate transporter 2.4	GO:0000325,GO:0001101,GO:0003674,GO:0005215,GO:0005575,GO:0005622,GO:0005623,GO:0005737,GO:0005773,GO:0005774,GO:0005886,GO:0006082,GO:0006807,GO:0006810,GO:0006811,GO:0006820,GO:0008150,GO:0008152,GO:0008509,GO:0009705,GO:0009987,GO:0010035,GO:0010167,GO:0015075,GO:0015103,GO:0015108,GO:0015112,GO:0015318,GO:0015698,GO:0015706,GO:0016020,GO:0016021,GO:0022857,GO:0031090,GO:0031224,GO:0034220,GO:…	ko:K02575
spt_1012805	probable sugar phosphatephosphate translocator At3g11320	GO:0003735,GO:0005575,GO:0005622,GO:0005623,GO:0005737,GO:0005783,GO:0005794,GO:0005840,GO:0006412,GO:0006810,GO:0008150,GO:0008643,GO:0012505,GO:0015297,GO:0016020,GO:0016021,GO:0031224,GO:0043226,GO:0043227,GO:0043229,GO:0043231,GO:0044424,GO:0044425,GO:0044444,GO:0044464,GO:0051179,GO:0051234,GO:0055085,GO:0071702,GO:1990904	-
spt_1013344	dirigent protein 22	GO:0009699,GO:0009987,GO:0016020,GO:0048046	-
spt_1013345	Dirigent protein 3	GO:0009699,GO:0009987,GO:0016020,GO:0048046	-
spt_1013347	carbon catabolite repressor protein 4 homolog 1	GO:0000175,GO:0000271,GO:0000289,GO:0000932,GO:0003674,GO:0003676,GO:0003723,GO:0003824,GO:0004518,GO:0004519,GO:0004527,GO:0004532,GO:0004535,GO:0004540,GO:0005488,GO:0005575,GO:0005622,GO:0005623,GO:0005634,GO:0005737,GO:0005829,GO:0005975,GO:0005976,GO:0005982,GO:0005984,GO:0005985,GO:0005986,GO:0006073,GO:0006139,GO:0006351,GO:0006355,GO:0006396,GO:0006397,GO:0006725,GO:0006807,GO:0008150,GO:…	ko:K12603
spt_1013348	VITISV_029750	-	ko:K00512
spt_1013349	Fbox protein At3g58530 isoform X2	GO:0002215,GO:0004663,GO:0005515,GO:0005575,GO:0005622,GO:0005623,GO:0005737,GO:0005829,GO:0005886,GO:0009987,GO:0010102,GO:0016874,GO:0019005,GO:0031146,GO:0044424,GO:0044444,GO:0044464,GO:0045177,GO:0048226,GO:0098542	ko:K10268,ko:K13051
spt_1013351	LOC100260585	-	-
spt_1013352	protein WHATS THIS FACTOR 9	GO:0003723,GO:0016787	-
spt_1013353	DEADbox ATPdependent RNA helicase 37	GO:0000166,GO:0000373,GO:0003674,GO:0003676,GO:0003689,GO:0003723,GO:0003724,GO:0003729,GO:0003824,GO:0004004,GO:0004386,GO:0005488,GO:0005524,GO:0005575,GO:0005622,GO:0005623,GO:0005634,GO:0005730,GO:0005737,GO:0005777,GO:0005886,GO:0006139,GO:0006338,GO:0006725,GO:0006807,GO:0008026,GO:0008144,GO:0008150,GO:0008152,GO:0008186,GO:0009506,GO:0009987,GO:0010501,GO:0016020,GO:0016070,GO:0016462,GO:…	ko:K10268,ko:K11594
spt_1013354	lipid phosphate phosphatase delta isoform X1	GO:0001101,GO:0003674,GO:0003824,GO:0005575,GO:0005622,GO:0005623,GO:0005737,GO:0005783,GO:0005789,GO:0006629,GO:0006643,GO:0006665,GO:0006793,GO:0006796,GO:0006807,GO:0008117,GO:0008150,GO:0008152,GO:0008195,GO:0008610,GO:0009058,GO:0009719,GO:0009725,GO:0009737,GO:0009987,GO:0010033,GO:0010118,GO:0012505,GO:0016020,GO:0016021,GO:0016311,GO:0016787,GO:0016788,GO:0016791,GO:0030148,GO:0031224,GO:…	ko:K04716
spt_1014566	glycerol kinaselike	GO:0000166,GO:0002237,GO:0003674,GO:0003824,GO:0004370,GO:0005488,GO:0005524,GO:0005575,GO:0005622,GO:0005623,GO:0005737,GO:0005739,GO:0005829,GO:0005975,GO:0006066,GO:0006071,GO:0006072,GO:0006629,GO:0006638,GO:0006639,GO:0006641,GO:0006793,GO:0006796,GO:0006950,GO:0006952,GO:0008144,GO:0008150,GO:0008152,GO:0009056,GO:0009058,GO:0009605,GO:0009607,GO:0009617,GO:0009628,GO:0009636,GO:0009987,GO:…	ko:K00864
spt_1014567	CK203_102488	-	-
spt_1014934	betaamyrin synthase 1like isoform X1	GO:0002238,GO:0003674,GO:0003824,GO:0004663,GO:0005789,GO:0005811,GO:0006629,GO:0006720,GO:0006721,GO:0006722,GO:0008150,GO:0008152,GO:0008299,GO:0008610,GO:0009058,GO:0009723,GO:0009753,GO:0009987,GO:0010038,GO:0016104,GO:0016114,GO:0016853,GO:0016866,GO:0019742,GO:0019745,GO:0031559,GO:0042300,GO:0042542,GO:0044237,GO:0044238,GO:0044249,GO:0044255,GO:0071704,GO:0071731,GO:1901360,GO:1901362,GO:…	ko:K15813,ko:K20658,ko:K21928
spt_1014935	CK203_045510	-	-
spt_1015247	-	GO:0001709,GO:0006950,GO:0008150,GO:0009266,GO:0009408,GO:0009628,GO:0050896	-
spt_1015248	LOC117923831	-	-
spt_1015249	LOC117923830	GO:0016020	-
spt_1015251	protein FAR1RELATED SEQUENCE 10	GO:0003674,GO:0005488,GO:0005634,GO:0006355,GO:0008150,GO:0008270,GO:0009889,GO:0010468,GO:0010556,GO:0019219,GO:0019222,GO:0031323,GO:0031326,GO:0043167,GO:0043169,GO:0046872,GO:0046914,GO:0050789,GO:0050794,GO:0051171,GO:0051252,GO:0060255,GO:0065007,GO:0080090,GO:1903506,GO:2000112,GO:2001141	-
spt_1015253	unnamed	GO:0000325,GO:0003674,GO:0005215,GO:0005216,GO:0005242,GO:0005244,GO:0005249,GO:0005261,GO:0005267,GO:0005488,GO:0005509,GO:0005575,GO:0005622,GO:0005623,GO:0005737,GO:0005773,GO:0005774,GO:0005886,GO:0005887,GO:0006810,GO:0006811,GO:0006812,GO:0006813,GO:0006873,GO:0006875,GO:0008150,GO:0008324,GO:0009705,GO:0009987,GO:0010029,GO:0010119,GO:0012505,GO:0015075,GO:0015077,GO:0015079,GO:0015267,GO:…	ko:K05389
spt_1015254	microtubuleassociated protein 705	GO:0003002,GO:0003674,GO:0005488,GO:0005515,GO:0005575,GO:0005622,GO:0005623,GO:0005737,GO:0005856,GO:0005874,GO:0006996,GO:0007010,GO:0007275,GO:0007389,GO:0008017,GO:0008092,GO:0008150,GO:0009832,GO:0009987,GO:0010051,GO:0015630,GO:0015631,GO:0016043,GO:0032501,GO:0032502,GO:0042546,GO:0043226,GO:0043228,GO:0043229,GO:0043232,GO:0044085,GO:0044422,GO:0044424,GO:0044430,GO:0044446,GO:0044464,GO:…	-
spt_1015255	VITISV_001457	-	-
spt_1015256	pentatricopeptide repeatcontaining protein At4g16390, chloroplastic	GO:0000166,GO:0003674,GO:0003676,GO:0003723,GO:0003727,GO:0003729,GO:0003735,GO:0003824,GO:0004518,GO:0004519,GO:0005488,GO:0005515,GO:0005575,GO:0005622,GO:0005623,GO:0005737,GO:0005739,GO:0005783,GO:0006139,GO:0006396,GO:0006397,GO:0006417,GO:0006725,GO:0006807,GO:0006996,GO:0008150,GO:0008152,GO:0009451,GO:0009507,GO:0009532,GO:0009536,GO:0009570,GO:0009657,GO:0009658,GO:0009793,GO:0009889,GO:…	-
spt_1015503	L10interacting MYB domaincontaining protein	-	-
spt_1015686	Glutamate receptor 2.9	GO:0004970,GO:0015276,GO:0016020,GO:0034220,GO:0038023,GO:0071944	ko:K05387
spt_1015687	glutamate receptor 2.9like	GO:0015276,GO:0016020,GO:0034220	ko:K05387
spt_1015688	Retrovirusrelated Pol polyprotein	-	ko:K13459
spt_1015691	glutamate receptor 2.9like	GO:0004970,GO:0015276,GO:0016020,GO:0034220,GO:0038023,GO:0071944	ko:K05387
spt_1015692	glutamate receptor 2.7	GO:0004970,GO:0015276,GO:0016020,GO:0034220,GO:0038023,GO:0071944	ko:K05387
spt_1016100	187kDa microtubuleassociated protein AIR9 isoform X5	GO:0002215,GO:0004663,GO:0005515,GO:0005886,GO:0009506,GO:0010102,GO:0045177,GO:0048226	-
spt_1016102	accelerated cell death 11 isoform X1	GO:0001101,GO:0002376,GO:0003674,GO:0005215,GO:0005319,GO:0005488,GO:0005575,GO:0005622,GO:0005623,GO:0005737,GO:0005829,GO:0006810,GO:0006811,GO:0006812,GO:0006869,GO:0006950,GO:0006952,GO:0006955,GO:0008150,GO:0008219,GO:0008289,GO:0008324,GO:0008519,GO:0009605,GO:0009607,GO:0009617,GO:0009719,GO:0009725,GO:0009751,GO:0009814,GO:0009816,GO:0009987,GO:0010033,GO:0010175,GO:0010876,GO:0014070,GO:…	ko:K08051
spt_1016204	RNAdirected DNA polymeraselike	GO:0003964,GO:0006278,GO:0016020	-
spt_1016224	-	GO:0000502,GO:0003674,GO:0003735,GO:0003824,GO:0004175,GO:0004298,GO:0005575,GO:0005622,GO:0005623,GO:0005634,GO:0005737,GO:0005829,GO:0005839,GO:0005840,GO:0006508,GO:0006511,GO:0006807,GO:0006950,GO:0006952,GO:0008150,GO:0008152,GO:0008233,GO:0009056,GO:0009057,GO:0009605,GO:0009607,GO:0009617,GO:0009987,GO:0010035,GO:0010038,GO:0010043,GO:0016787,GO:0019538,GO:0019773,GO:0019941,GO:0022626,GO:…	ko:K02726
spt_1016225	RINGH2 finger protein ATL65like	GO:0000151,GO:0000153,GO:0000209,GO:0000835,GO:0000836,GO:0002020,GO:0003674,GO:0003824,GO:0004842,GO:0005488,GO:0005515,GO:0005575,GO:0005622,GO:0005623,GO:0005737,GO:0005783,GO:0005789,GO:0006464,GO:0006508,GO:0006511,GO:0006807,GO:0006950,GO:0006986,GO:0007154,GO:0007165,GO:0008150,GO:0008152,GO:0008270,GO:0008593,GO:0009056,GO:0009057,GO:0009966,GO:0009987,GO:0010033,GO:0010243,GO:0010468,GO:…	ko:K11982,ko:K22378
spt_1016369	transcription termination factor MTEF18	GO:0003676,GO:0003690,GO:0005737,GO:0006353,GO:0006355,GO:0016791,GO:0043231	-
spt_1017150	potassium channel SKOR	GO:0003674,GO:0004622,GO:0005215,GO:0005216,GO:0005244,GO:0005249,GO:0005261,GO:0005267,GO:0005515,GO:0005516,GO:0005575,GO:0005623,GO:0005634,GO:0005886,GO:0005887,GO:0006810,GO:0006811,GO:0006812,GO:0006813,GO:0008150,GO:0008324,GO:0009987,GO:0015075,GO:0015077,GO:0015079,GO:0015267,GO:0015271,GO:0015318,GO:0015672,GO:0016020,GO:0016021,GO:0022803,GO:0022832,GO:0022836,GO:0022838,GO:0022839,GO:…	ko:K21867
spt_1017151	CCR4NOT transcription complex subunit 10	GO:0003727,GO:0003735,GO:0005515,GO:0006402,GO:0009507,GO:0009737,GO:0009793,GO:0009987,GO:0017148,GO:0030014,GO:0080156,GO:0090568	ko:K12607
spt_1017152	VITISV_022451	-	ko:K00512
spt_1017153	Transposon TX1 uncharacterized 149 kDa protein	GO:0016020	ko:K00512
spt_1017154	36.4 kDa prolinerich protein	GO:0016020	-
spt_1017155	Uncharacterized protein TCM_047111	-	-
spt_1017156	-	GO:0000149,GO:0001101,GO:0003674,GO:0005484,GO:0005488,GO:0005515,GO:0005575,GO:0005622,GO:0005623,GO:0005737,GO:0005768,GO:0005770,GO:0005773,GO:0005774,GO:0005794,GO:0005886,GO:0006810,GO:0006887,GO:0006906,GO:0006950,GO:0006970,GO:0006996,GO:0008104,GO:0008150,GO:0009628,GO:0009651,GO:0009719,GO:0009725,GO:0009737,GO:0009987,GO:0010008,GO:0010033,GO:0010118,GO:0012505,GO:0015031,GO:0015833,GO:…	ko:K08515
spt_1017263	serinethreonineprotein kinase BRI1like 2 isoform X1	GO:0002215,GO:0005515,GO:0005886,GO:0010102,GO:0016020,GO:0045177,GO:0048226	-
spt_1017264	receptorlike protein 9a isoform X2	GO:0002215,GO:0004663,GO:0005515,GO:0005886,GO:0006952,GO:0010102,GO:0016301,GO:0045177,GO:0048226,GO:0051707	-
spt_1017265	unnamed	GO:0000139,GO:0000271,GO:0003674,GO:0003824,GO:0005575,GO:0005622,GO:0005623,GO:0005737,GO:0005768,GO:0005794,GO:0005802,GO:0005975,GO:0005976,GO:0006464,GO:0006486,GO:0006807,GO:0008150,GO:0008152,GO:0008194,GO:0009058,GO:0009059,GO:0009100,GO:0009101,GO:0009987,GO:0010393,GO:0010398,GO:0012505,GO:0016020,GO:0016021,GO:0016043,GO:0016051,GO:0016740,GO:0016757,GO:0016763,GO:0017144,GO:0019538,GO:…	ko:K18789
spt_1017266	heptahelical transmembrane protein 1	GO:0005575,GO:0006950,GO:0006970,GO:0008150,GO:0009628,GO:0009651,GO:0009719,GO:0009725,GO:0009743,GO:0009744,GO:0009787,GO:0009788,GO:0009966,GO:0009968,GO:0010033,GO:0010646,GO:0010648,GO:0016020,GO:0016021,GO:0023051,GO:0023057,GO:0031224,GO:0034285,GO:0038023,GO:0042221,GO:0044425,GO:0046872,GO:0048519,GO:0048523,GO:0048583,GO:0048585,GO:0050789,GO:0050794,GO:0050896,GO:0065007,GO:1901419,GO:…	ko:K07297
spt_1017267	CK203_020041	-	-
spt_1017810	mannosyloligosaccharide 1,2alphamannosidase MNS1	GO:0000139,GO:0004571,GO:0005509,GO:0005783,GO:0005975,GO:0006491,GO:0016020,GO:0036503	ko:K01230
spt_1017812	protein SMAX1LIKE 4	GO:0003674,GO:0003676,GO:0003824,GO:0005524,GO:0005575,GO:0005622,GO:0005623,GO:0005634,GO:0005737,GO:0006139,GO:0006351,GO:0006355,GO:0006725,GO:0006807,GO:0006810,GO:0008150,GO:0008152,GO:0009058,GO:0009059,GO:0009507,GO:0009536,GO:0009889,GO:0009987,GO:0010232,GO:0010233,GO:0010467,GO:0010468,GO:0010556,GO:0016070,GO:0016787,GO:0016887,GO:0018130,GO:0019219,GO:0019222,GO:0019438,GO:0019538,GO:…	-
spt_1017813	protein TRANSPARENT TESTA 9 isoform X3	GO:0000139,GO:0001708,GO:0005575,GO:0005622,GO:0005623,GO:0005737,GO:0005770,GO:0005794,GO:0006810,GO:0007034,GO:0008150,GO:0008152,GO:0009058,GO:0009718,GO:0009812,GO:0009813,GO:0009987,GO:0010638,GO:0012505,GO:0016020,GO:0016192,GO:0016197,GO:0019898,GO:0030154,GO:0031090,GO:0031984,GO:0032502,GO:0033043,GO:0042440,GO:0043226,GO:0043227,GO:0043229,GO:0043231,GO:0044088,GO:0044090,GO:0044422,GO:…	ko:K19513
spt_1017814	Transposon TX1 uncharacterized 149 kDa protein	GO:0003964,GO:0006278	-
spt_1017890	AP2like ethyleneresponsive transcription factor AIL5	GO:0000160,GO:0001067,GO:0003002,GO:0003674,GO:0003676,GO:0003677,GO:0003700,GO:0005488,GO:0005575,GO:0005622,GO:0005623,GO:0005634,GO:0006139,GO:0006351,GO:0006355,GO:0006725,GO:0006807,GO:0006952,GO:0007154,GO:0007165,GO:0007275,GO:0007389,GO:0008150,GO:0008152,GO:0009058,GO:0009059,GO:0009653,GO:0009719,GO:0009723,GO:0009725,GO:0009733,GO:0009734,GO:0009755,GO:0009791,GO:0009845,GO:0009873,GO:…	ko:K09285
spt_1017891	AP2like ethyleneresponsive transcription factor AIL5	GO:0000160,GO:0003002,GO:0003674,GO:0003676,GO:0003677,GO:0003700,GO:0005488,GO:0005575,GO:0005622,GO:0005623,GO:0005634,GO:0006139,GO:0006351,GO:0006355,GO:0006725,GO:0006807,GO:0007154,GO:0007165,GO:0007275,GO:0007389,GO:0008150,GO:0008152,GO:0009058,GO:0009059,GO:0009653,GO:0009719,GO:0009723,GO:0009725,GO:0009733,GO:0009734,GO:0009755,GO:0009791,GO:0009845,GO:0009873,GO:0009889,GO:0009956,GO:…	ko:K09285
spt_1017892	replication protein A 32 kDa subunit A isoform X1	GO:0000228,GO:0000278,GO:0000724,GO:0000781,GO:0003674,GO:0003676,GO:0003677,GO:0003697,GO:0005488,GO:0005575,GO:0005622,GO:0005623,GO:0005634,GO:0005657,GO:0005662,GO:0005694,GO:0006139,GO:0006259,GO:0006260,GO:0006261,GO:0006269,GO:0006281,GO:0006289,GO:0006310,GO:0006725,GO:0006807,GO:0006950,GO:0006974,GO:0007049,GO:0008150,GO:0008152,GO:0008757,GO:0009058,GO:0009059,GO:0009987,GO:0016070,GO:…	ko:K10739
spt_1018033	LOC104881534	-	-
spt_1018034	twopore potassium channel 3	GO:0005267,GO:0005509,GO:0005886,GO:0009705,GO:0012505,GO:0015271,GO:0022841,GO:0030322,GO:0071805	ko:K05389
spt_1018035	LOC100245557 isoform X2	GO:0009507	-
spt_1018036	Copia protein	GO:0000271,GO:0001871,GO:0003674,GO:0003824,GO:0004373,GO:0005488,GO:0005575,GO:0005622,GO:0005623,GO:0005737,GO:0005975,GO:0005976,GO:0005982,GO:0006073,GO:0008150,GO:0008152,GO:0008194,GO:0009011,GO:0009058,GO:0009059,GO:0009250,GO:0009501,GO:0009507,GO:0009536,GO:0009987,GO:0016051,GO:0016740,GO:0016757,GO:0016758,GO:0019252,GO:0030246,GO:0030247,GO:0033201,GO:0033692,GO:0034637,GO:0034645,GO:…	-
spt_1018038	ribonuclease H protein	GO:0003674,GO:0003676,GO:0003723,GO:0003727,GO:0003735,GO:0003824,GO:0004518,GO:0004519,GO:0005488,GO:0005515,GO:0005575,GO:0005622,GO:0005623,GO:0005739,GO:0005783,GO:0006139,GO:0006725,GO:0006807,GO:0008150,GO:0008152,GO:0009451,GO:0009507,GO:0009793,GO:0009987,GO:0016070,GO:0016554,GO:0016787,GO:0016788,GO:0022626,GO:0034641,GO:0043170,GO:0043226,GO:0043227,GO:0043229,GO:0043231,GO:0043412,GO:…	-
spt_1018491	BPILBP family protein	GO:0001530,GO:0003674,GO:0005488,GO:0005575,GO:0005576,GO:0005615,GO:0005622,GO:0005623,GO:0005737,GO:0005773,GO:0005774,GO:0008150,GO:0008152,GO:0008289,GO:0009058,GO:0009987,GO:0010468,GO:0016020,GO:0019222,GO:0031090,GO:0043226,GO:0043227,GO:0043229,GO:0043231,GO:0044237,GO:0044421,GO:0044422,GO:0044424,GO:0044437,GO:0044444,GO:0044446,GO:0044464,GO:0050789,GO:0060255,GO:0065007,GO:0072593,GO:…	ko:K05399
spt_1018492	LOC117926463	GO:0003723,GO:0003743,GO:0006413,GO:0016020	-
spt_1018493	IST1like protein	GO:0008104,GO:0015031,GO:0016020	ko:K19476
spt_1018494	At4g04980	-	ko:K05747
spt_1018495	LOC104880896	GO:0005886,GO:0098542	-
spt_1018496	VITISV_031602	-	-
spt_1018497	unnamed	GO:0003002,GO:0005575,GO:0005576,GO:0007275,GO:0007389,GO:0008150,GO:0009653,GO:0009791,GO:0009888,GO:0009987,GO:0010016,GO:0010052,GO:0010103,GO:0010374,GO:0010375,GO:0016020,GO:0030154,GO:0032501,GO:0032502,GO:0048367,GO:0048519,GO:0048580,GO:0048581,GO:0048731,GO:0048856,GO:0048869,GO:0050789,GO:0050793,GO:0051093,GO:0051239,GO:0051241,GO:0065007,GO:0090558,GO:0090626,GO:0090627,GO:0090698,GO:…	ko:K20729
spt_1018499	ELMO domaincontaining protein B isoform X3	GO:0003674,GO:0005488,GO:0005515,GO:0005575,GO:0005622,GO:0005623,GO:0005737,GO:0006928,GO:0008064,GO:0008092,GO:0008150,GO:0009987,GO:0010639,GO:0016020,GO:0016043,GO:0017022,GO:0030100,GO:0030587,GO:0030832,GO:0030833,GO:0030837,GO:0031333,GO:0032271,GO:0032272,GO:0032502,GO:0032535,GO:0032879,GO:0032956,GO:0032970,GO:0033043,GO:0040011,GO:0043254,GO:0044087,GO:0044424,GO:0044464,GO:0045159,GO:…	ko:K19241
spt_1018501	-	GO:0003674,GO:0003824,GO:0005488,GO:0005515,GO:0008150,GO:0008152,GO:0008168,GO:0008171,GO:0008757,GO:0016740,GO:0016741,GO:0030784,GO:0030786,GO:0032259,GO:0046983	-
spt_1018529	QWRF motifcontaining protein 3	GO:0005737,GO:0005880,GO:0008017,GO:0051225	-
spt_1018530	probable galacturonosyltransferase 10	GO:0000137,GO:0000139,GO:0000271,GO:0003674,GO:0003824,GO:0005575,GO:0005622,GO:0005623,GO:0005737,GO:0005768,GO:0005783,GO:0005794,GO:0005802,GO:0005975,GO:0005976,GO:0008150,GO:0008152,GO:0008194,GO:0009058,GO:0009059,GO:0009706,GO:0009987,GO:0010192,GO:0010393,GO:0010442,GO:0012505,GO:0016020,GO:0016021,GO:0016043,GO:0016051,GO:0016740,GO:0016757,GO:0016758,GO:0017144,GO:0031090,GO:0031224,GO:…	ko:K13648
spt_1018531	CK203_045564	GO:0016020	ko:K21249
spt_1018532	Fboxkelchrepeat protein At3g23880like	GO:0005515,GO:0008284	-
spt_1018533	Fbox protein At3g07870like	GO:0005515,GO:0005575,GO:0005777,GO:0005911,GO:0006355,GO:0006511,GO:0008150,GO:0008284,GO:0009506,GO:0019005,GO:0030054,GO:0042127,GO:0048518,GO:0048522,GO:0050789,GO:0050794,GO:0055044,GO:0065007	-
spt_1018534	Fboxkelchrepeat protein At3g23880like	GO:0005515	-
spt_1019135	-	GO:0002215,GO:0003677,GO:0003700,GO:0005515,GO:0005524,GO:0005634,GO:0005886,GO:0006355,GO:0006952,GO:0010102,GO:0043531,GO:0045177,GO:0048226	-
spt_1019136	Disease resistance protein	-	-
spt_1019137	Disease resistance protein	GO:0005524,GO:0006952,GO:0043531	ko:K13459
spt_1019138	disease resistance protein At4g27190like	GO:0005515,GO:0043531	-
spt_1019139	disease resistance protein	-	-
spt_1019184	-	GO:0005515,GO:0005680	ko:K03364
spt_1019185	VITISV_007508	GO:0003677,GO:0046983	-
spt_1019186	-	GO:0000166,GO:0002215,GO:0002218,GO:0002252,GO:0002253,GO:0002376,GO:0002682,GO:0002684,GO:0003674,GO:0004663,GO:0005488,GO:0005515,GO:0005524,GO:0005575,GO:0005622,GO:0005623,GO:0005634,GO:0005737,GO:0005886,GO:0006950,GO:0006952,GO:0006955,GO:0007154,GO:0007165,GO:0007275,GO:0008144,GO:0008150,GO:0008219,GO:0009314,GO:0009416,GO:0009605,GO:0009607,GO:0009615,GO:0009617,GO:0009626,GO:0009628,GO:…	ko:K16226
spt_1019188	Pentatricopeptide repeatcontaining protein, chloroplastic	GO:0003723,GO:0003727,GO:0003735,GO:0005515,GO:0005739,GO:0005783,GO:0009507,GO:0009793,GO:0016554,GO:0022626,GO:0080156	-
spt_1019189	LOC117906432 isoform X1	-	-
spt_1019420	ATP phosphoribosyltransferase 2, chloroplastic	GO:0000105,GO:0000166,GO:0000287,GO:0003674,GO:0003824,GO:0003879,GO:0005488,GO:0005524,GO:0005575,GO:0005622,GO:0005623,GO:0005737,GO:0006082,GO:0006520,GO:0006547,GO:0006725,GO:0006807,GO:0008144,GO:0008150,GO:0008152,GO:0008652,GO:0009058,GO:0009507,GO:0009532,GO:0009536,GO:0009570,GO:0009987,GO:0016053,GO:0016740,GO:0016757,GO:0016763,GO:0017076,GO:0018130,GO:0019438,GO:0019752,GO:0030554,GO:…	ko:K00765
spt_1019421	Retrovirusrelated Pol polyprotein	GO:0001054,GO:0001055,GO:0001056,GO:0001057,GO:0001058,GO:0001059,GO:0001060,GO:0001065,GO:0001066,GO:0004491,GO:0006360,GO:0006366,GO:0006383,GO:0006390,GO:0016020,GO:0016301,GO:0042793	-
spt_1019422	nifUlike protein 2, chloroplastic	GO:0003674,GO:0005198,GO:0005488,GO:0005506,GO:0005575,GO:0005622,GO:0005623,GO:0005737,GO:0005739,GO:0005886,GO:0006357,GO:0006790,GO:0006950,GO:0006952,GO:0006996,GO:0008150,GO:0008152,GO:0009507,GO:0009532,GO:0009536,GO:0009570,GO:0009657,GO:0009658,GO:0009987,GO:0016020,GO:0016043,GO:0016226,GO:0022607,GO:0031163,GO:0043167,GO:0043169,GO:0043226,GO:0043227,GO:0043229,GO:0043231,GO:0044085,GO:…	-
spt_1019423	WEB family protein At1g75720	GO:0005829,GO:0009903,GO:0009904	-
spt_1019424	DExHbox ATPdependent RNA helicase DExH7, chloroplastic isoform X2	GO:0000373,GO:0003676,GO:0003689,GO:0003723,GO:0003729,GO:0004386,GO:0005524,GO:0005634,GO:0005730,GO:0006338,GO:0008186,GO:0009506,GO:0016020,GO:0016787,GO:0061775,GO:0140098,GO:0140584,GO:0140588,GO:0140665,GO:0140849	ko:K18995
spt_1019425	Copia protein	GO:0003674,GO:0003676,GO:0003700,GO:0003824,GO:0003964,GO:0004175,GO:0004190,GO:0004518,GO:0004519,GO:0004565,GO:0005488,GO:0005975,GO:0006139,GO:0006259,GO:0006278,GO:0006355,GO:0006508,GO:0006725,GO:0006807,GO:0008150,GO:0008152,GO:0008233,GO:0008270,GO:0009058,GO:0009059,GO:0009987,GO:0015074,GO:0016602,GO:0016740,GO:0016772,GO:0016779,GO:0016787,GO:0016788,GO:0018130,GO:0019438,GO:0019538,GO:…	ko:K08874
spt_1019426	LINE1 reverse transcriptaselike	GO:0000123,GO:0002576,GO:0003674,GO:0005488,GO:0005575,GO:0005576,GO:0005622,GO:0005623,GO:0005634,GO:0005654,GO:0005737,GO:0005829,GO:0006325,GO:0006464,GO:0006473,GO:0006475,GO:0006807,GO:0006810,GO:0006887,GO:0006996,GO:0008150,GO:0008152,GO:0009987,GO:0016043,GO:0016192,GO:0016569,GO:0016570,GO:0016573,GO:0018193,GO:0018205,GO:0018393,GO:0018394,GO:0019538,GO:0031248,GO:0031974,GO:0031981,GO:…	ko:K22184
spt_1019810	probable serinethreonineprotein kinase PBL7	GO:0000166,GO:0002215,GO:0002218,GO:0002221,GO:0002253,GO:0002376,GO:0002682,GO:0002684,GO:0002757,GO:0002758,GO:0002764,GO:0003674,GO:0003824,GO:0004672,GO:0004674,GO:0004675,GO:0004715,GO:0004888,GO:0005488,GO:0005515,GO:0005524,GO:0005575,GO:0005623,GO:0005634,GO:0005730,GO:0005886,GO:0006464,GO:0006468,GO:0006793,GO:0006796,GO:0006807,GO:0006950,GO:0006952,GO:0006955,GO:0007154,GO:0007165,GO:…	-
spt_1019811	TBC1 domain family member 8B	GO:0003674,GO:0005096,GO:0005488,GO:0005509,GO:0005515,GO:0005575,GO:0005622,GO:0005623,GO:0006810,GO:0006886,GO:0008047,GO:0008104,GO:0008150,GO:0012505,GO:0015031,GO:0015833,GO:0017016,GO:0017137,GO:0019899,GO:0030234,GO:0030695,GO:0031267,GO:0031338,GO:0032879,GO:0033036,GO:0033043,GO:0034613,GO:0042886,GO:0043085,GO:0043087,GO:0043167,GO:0043169,GO:0043547,GO:0044093,GO:0044464,GO:0045184,GO:…	ko:K19951
spt_1020267	LOC117928576 isoform X1	GO:0000003,GO:0000209,GO:0001654,GO:0001709,GO:0002009,GO:0002064,GO:0002065,GO:0002066,GO:0002165,GO:0002682,GO:0002683,GO:0003002,GO:0003006,GO:0003008,GO:0003674,GO:0003676,GO:0003677,GO:0003824,GO:0004839,GO:0004842,GO:0005488,GO:0005543,GO:0005575,GO:0005622,GO:0005623,GO:0005634,GO:0005737,GO:0005829,GO:0005886,GO:0006464,GO:0006807,GO:0007275,GO:0007276,GO:0007281,GO:0007292,GO:0007389,GO:…	-
spt_1020268	myosin9like isoform X1	GO:0016020	ko:K20283
spt_1020269	protein DMR6LIKE OXYGENASE 2	GO:0002238,GO:0003674,GO:0003824,GO:0005488,GO:0006807,GO:0008150,GO:0008152,GO:0008168,GO:0009805,GO:0009820,GO:0009987,GO:0016491,GO:0016705,GO:0016706,GO:0016740,GO:0016741,GO:0032259,GO:0043167,GO:0043169,GO:0046872,GO:0051213,GO:0055114,GO:0071704,GO:0102802,GO:0102804,GO:1901564	-
spt_1020284	probable U3 small nucleolar RNAassociated protein 7	GO:0000462,GO:0003674,GO:0003676,GO:0003723,GO:0005488,GO:0005515,GO:0005575,GO:0005634,GO:0005730,GO:0005732,GO:0006139,GO:0006364,GO:0006396,GO:0006725,GO:0006807,GO:0008150,GO:0008152,GO:0009987,GO:0010467,GO:0010492,GO:0016020,GO:0016070,GO:0016072,GO:0016740,GO:0022613,GO:0030490,GO:0030515,GO:0030684,GO:0030686,GO:0032040,GO:0032991,GO:0034470,GO:0034641,GO:0034660,GO:0042254,GO:0042274,GO:…	ko:K14768
spt_1020285	probable phytol kinase 1, chloroplastic isoform X1	GO:0003674,GO:0003824,GO:0005575,GO:0005622,GO:0005623,GO:0005737,GO:0006766,GO:0006775,GO:0006793,GO:0006796,GO:0008150,GO:0008152,GO:0009058,GO:0009110,GO:0009507,GO:0009526,GO:0009536,GO:0009941,GO:0009987,GO:0010189,GO:0010276,GO:0016020,GO:0016021,GO:0016301,GO:0016310,GO:0016740,GO:0016772,GO:0016779,GO:0018130,GO:0031090,GO:0031224,GO:0031967,GO:0031969,GO:0031975,GO:0042170,GO:0042360,GO:…	ko:K18678
spt_1020356	protein GLUTELIN PRECURSOR ACCUMULATION 3 isoform X1	GO:0000326,GO:0003674,GO:0005488,GO:0005515,GO:0005575,GO:0005622,GO:0005623,GO:0005737,GO:0005802,GO:0005829,GO:0006886,GO:0019762,GO:0043167,GO:0043169,GO:0044424,GO:0044464,GO:0046872	-
spt_1020358	CK203_092835	-	ko:K19748
spt_1020473	VITISV_028330	GO:0003676,GO:0003964,GO:0004519,GO:0009987,GO:0015074,GO:0016020,GO:0034654	-
spt_1020474	VITISV_018835	GO:0016020	-
spt_1020667	VITISV_039129	GO:0000002,GO:0000122,GO:0000166,GO:0001775,GO:0001776,GO:0001932,GO:0001933,GO:0001941,GO:0001959,GO:0001960,GO:0002260,GO:0002376,GO:0002520,GO:0002521,GO:0002682,GO:0002683,GO:0002684,GO:0002694,GO:0002696,GO:0003674,GO:0005102,GO:0005126,GO:0005133,GO:0005488,GO:0005515,GO:0005524,GO:0005575,GO:0005622,GO:0005623,GO:0005634,GO:0005737,GO:0005739,GO:0005759,GO:0005829,GO:0005856,GO:0005884,GO:…	ko:K05337
spt_1020691	valinetRNA ligase, chloroplasticmitochondrial 2	GO:0000003,GO:0000166,GO:0002161,GO:0003006,GO:0003674,GO:0003824,GO:0004812,GO:0004832,GO:0005488,GO:0005524,GO:0005575,GO:0005622,GO:0005623,GO:0005737,GO:0005739,GO:0005829,GO:0006082,GO:0006139,GO:0006399,GO:0006412,GO:0006418,GO:0006438,GO:0006450,GO:0006518,GO:0006520,GO:0006725,GO:0006807,GO:0007275,GO:0008144,GO:0008150,GO:0008152,GO:0009058,GO:0009059,GO:0009507,GO:0009532,GO:0009536,GO:…	ko:K01873
spt_1020692	CK203_047027	-	ko:K21249
spt_1020824	Protein FAR1related sequence 5	GO:0003676,GO:0003677,GO:0003700,GO:0004803,GO:0005634,GO:0006313,GO:0006355,GO:0008270,GO:0043565	ko:K17604
spt_1020825	serinethreonineprotein phosphatase 7 long form homolog	-	-
spt_1021032	RNA helicase aquariuslike	GO:0000398,GO:0003729,GO:0004386,GO:0016020,GO:0016787,GO:0036292,GO:0071013	ko:K12874
spt_1021034	xanthoxin dehydrogenase	GO:0001101,GO:0003674,GO:0003824,GO:0004022,GO:0004316,GO:0005575,GO:0005622,GO:0005623,GO:0005737,GO:0005829,GO:0006066,GO:0006082,GO:0006520,GO:0006560,GO:0006561,GO:0006629,GO:0006714,GO:0006720,GO:0006721,GO:0006807,GO:0006950,GO:0007154,GO:0007165,GO:0008150,GO:0008152,GO:0008299,GO:0008610,GO:0008652,GO:0009058,GO:0009064,GO:0009084,GO:0009266,GO:0009408,GO:0009414,GO:0009415,GO:0009628,GO:…	ko:K09841
spt_1021052	CK203_088168	GO:0003676,GO:0008270	-
spt_1021053	LOC117927932	-	-
spt_1021054	protein MEN8like	-	-
spt_1022369	LOC117903970	GO:0004180,GO:0016020	-
spt_1022371	LOC117904046	GO:0016020	-
spt_1022372	LOC104881595	GO:0016020	-
spt_1022394	UDPglycosyltransferase 89A2	GO:0003674,GO:0003824,GO:0005575,GO:0005622,GO:0005623,GO:0008150,GO:0008152,GO:0008194,GO:0016740,GO:0016757,GO:0016758,GO:0035251,GO:0043226,GO:0043227,GO:0043229,GO:0043231,GO:0044424,GO:0044464,GO:0046527,GO:0080043,GO:0080044	-
spt_1022422	Transposon Ty3G GagPol polyprotein	-	-
spt_1022423	nuclear transcription factor Y subunit C4like	GO:0000976,GO:0003674,GO:0003676,GO:0003677,GO:0003700,GO:0005488,GO:0005515,GO:0005575,GO:0005622,GO:0005623,GO:0005634,GO:0005667,GO:0005730,GO:0005737,GO:0006139,GO:0006351,GO:0006355,GO:0006725,GO:0006807,GO:0008150,GO:0008152,GO:0009058,GO:0009059,GO:0009889,GO:0009891,GO:0009893,GO:0009987,GO:0010369,GO:0010467,GO:0010468,GO:0010556,GO:0010557,GO:0010604,GO:0010628,GO:0016070,GO:0016602,GO:…	ko:K08066
spt_1022424	WD40 repeat	GO:0000045,GO:0000422,GO:0000423,GO:0003674,GO:0005488,GO:0005515,GO:0005575,GO:0005622,GO:0005623,GO:0005634,GO:0005730,GO:0005737,GO:0005739,GO:0005773,GO:0005776,GO:0005829,GO:0005856,GO:0005929,GO:0005930,GO:0006914,GO:0006950,GO:0006996,GO:0007005,GO:0007033,GO:0007154,GO:0007275,GO:0007399,GO:0008150,GO:0008152,GO:0008285,GO:0009056,GO:0009267,GO:0009605,GO:0009790,GO:0009792,GO:0009888,GO:…	ko:K17985
spt_1022425	CK203_066473	GO:0000976,GO:0003674,GO:0003676,GO:0003677,GO:0003700,GO:0005488,GO:0005515,GO:0005575,GO:0005622,GO:0005623,GO:0005634,GO:0005667,GO:0005730,GO:0005737,GO:0006139,GO:0006351,GO:0006355,GO:0006725,GO:0006807,GO:0008150,GO:0008152,GO:0009058,GO:0009059,GO:0009889,GO:0009891,GO:0009893,GO:0009987,GO:0010369,GO:0010467,GO:0010468,GO:0010556,GO:0010557,GO:0010604,GO:0010628,GO:0016070,GO:0016602,GO:…	ko:K08066
spt_1022684	ABC transporter B family member 27like	GO:0000166,GO:0000325,GO:0003674,GO:0003824,GO:0005215,GO:0005488,GO:0005524,GO:0005575,GO:0005622,GO:0005623,GO:0005737,GO:0005743,GO:0005773,GO:0005774,GO:0005886,GO:0006810,GO:0006811,GO:0006873,GO:0006875,GO:0008144,GO:0008150,GO:0009506,GO:0009705,GO:0009987,GO:0010035,GO:0010038,GO:0010044,GO:0010217,GO:0014035,GO:0015075,GO:0015083,GO:0015318,GO:0015399,GO:0015405,GO:0015421,GO:0015833,GO:…	ko:K05657
spt_1022685	ABC transporter B family member 27like	GO:0000166,GO:0000325,GO:0003674,GO:0003824,GO:0005215,GO:0005488,GO:0005524,GO:0005575,GO:0005622,GO:0005623,GO:0005737,GO:0005743,GO:0005773,GO:0005774,GO:0005886,GO:0006810,GO:0006811,GO:0006873,GO:0006875,GO:0008144,GO:0008150,GO:0009506,GO:0009705,GO:0009987,GO:0010035,GO:0010038,GO:0010044,GO:0010217,GO:0014035,GO:0015075,GO:0015083,GO:0015318,GO:0015399,GO:0015405,GO:0015421,GO:0015833,GO:…	ko:K05657
spt_1022686	eukaryotic translation initiation factor 3 subunit Mlike	GO:0000502,GO:0001732,GO:0002181,GO:0002183,GO:0003674,GO:0003676,GO:0003723,GO:0003743,GO:0005488,GO:0005575,GO:0005622,GO:0005623,GO:0005737,GO:0005852,GO:0006412,GO:0006413,GO:0006518,GO:0006807,GO:0008135,GO:0008150,GO:0008152,GO:0009058,GO:0009059,GO:0009987,GO:0010467,GO:0016282,GO:0019538,GO:0032991,GO:0033290,GO:0034641,GO:0034645,GO:0043043,GO:0043170,GO:0043603,GO:0043604,GO:0044237,GO:…	ko:K15030
spt_1022687	protein SPIRAL1like 3	GO:0005575,GO:0005622,GO:0005623,GO:0005856,GO:0005874,GO:0010005,GO:0015630,GO:0043226,GO:0043228,GO:0043229,GO:0043232,GO:0043622,GO:0044422,GO:0044424,GO:0044430,GO:0044446,GO:0044464,GO:0099080,GO:0099081,GO:0099512,GO:0099513	ko:K18635
spt_1022688	protein RIK isoform X1	GO:0003674,GO:0003676,GO:0003723,GO:0005488,GO:0005575,GO:0005622,GO:0005623,GO:0005634,GO:0016020,GO:0043226,GO:0043227,GO:0043229,GO:0043231,GO:0044424,GO:0044464,GO:0097159,GO:1901363	-
spt_1022689	Exocyst complex component EXO70E2	GO:0000145,GO:0005546,GO:0005575,GO:0005622,GO:0005623,GO:0005737,GO:0005829,GO:0005886,GO:0005938,GO:0006810,GO:0006887,GO:0008104,GO:0008150,GO:0009987,GO:0015031,GO:0015833,GO:0016020,GO:0016192,GO:0030496,GO:0032940,GO:0032991,GO:0033036,GO:0042886,GO:0044424,GO:0044444,GO:0044448,GO:0044464,GO:0045184,GO:0046903,GO:0051179,GO:0051234,GO:0071702,GO:0071705,GO:0071944,GO:0090543,GO:0099023,GO:…	ko:K07195
spt_1022690	Serine carboxypeptidaselike 25	GO:0003674,GO:0003824,GO:0004180,GO:0004185,GO:0005575,GO:0005576,GO:0005615,GO:0005773,GO:0006508,GO:0006807,GO:0007154,GO:0007165,GO:0008150,GO:0008152,GO:0008233,GO:0008236,GO:0008238,GO:0009056,GO:0009057,GO:0009719,GO:0009725,GO:0009741,GO:0009742,GO:0009755,GO:0009987,GO:0010033,GO:0014070,GO:0016020,GO:0016787,GO:0017171,GO:0019538,GO:0023052,GO:0030163,GO:0032870,GO:0033993,GO:0042221,GO:…	ko:K16297
spt_1022709	VITISV_016643	GO:0003676,GO:0004190,GO:0009987,GO:0015074	-
spt_1022746	VITISV_024069	GO:0008270,GO:0016020	-
spt_1022747	syntaxin22	GO:0000149,GO:0005484,GO:0006886,GO:0006906,GO:0012505,GO:0016020,GO:0031201,GO:0048278	-
spt_1022748	ATPdependent DNA helicase At3g02060, chloroplastic	GO:0000166,GO:0000373,GO:0003674,GO:0003676,GO:0003677,GO:0003684,GO:0003689,GO:0003729,GO:0003824,GO:0004386,GO:0005488,GO:0005524,GO:0005575,GO:0005622,GO:0005623,GO:0005634,GO:0005730,GO:0005737,GO:0006139,GO:0006259,GO:0006281,GO:0006338,GO:0006725,GO:0006807,GO:0006950,GO:0006974,GO:0008144,GO:0008150,GO:0008152,GO:0009506,GO:0009507,GO:0009536,GO:0009987,GO:0016462,GO:0016787,GO:0016817,GO:…	-
spt_1022749	Lipid transferlike protein VAS	GO:0003674,GO:0005488,GO:0005575,GO:0005886,GO:0006869,GO:0008289,GO:0016020,GO:0031224,GO:0031225,GO:0044425,GO:0098552	-
spt_1022750	unnamed	-	-
spt_1022751	retinoblastomarelated proteinlike isoform X1	GO:0000785,GO:0000977,GO:0005575,GO:0005622,GO:0005623,GO:0005634,GO:0005667,GO:0006139,GO:0006351,GO:0006355,GO:0006357,GO:0006725,GO:0006807,GO:0007049,GO:0008150,GO:0008152,GO:0009058,GO:0009059,GO:0009889,GO:0009987,GO:0010467,GO:0010468,GO:0010556,GO:0016020,GO:0016032,GO:0016070,GO:0018130,GO:0019219,GO:0019222,GO:0019438,GO:0030154,GO:0031323,GO:0031326,GO:0032774,GO:0034641,GO:0034645,GO:…	ko:K04681
spt_1022752	potassium transporter 4	GO:0000902,GO:0003674,GO:0005215,GO:0005575,GO:0005622,GO:0005623,GO:0005737,GO:0005773,GO:0005774,GO:0005886,GO:0006810,GO:0006811,GO:0006812,GO:0006813,GO:0008150,GO:0008324,GO:0009653,GO:0009826,GO:0009932,GO:0009987,GO:0015075,GO:0015077,GO:0015079,GO:0015318,GO:0015672,GO:0016020,GO:0016021,GO:0016043,GO:0016049,GO:0016462,GO:0022857,GO:0022890,GO:0030001,GO:0031090,GO:0031224,GO:0032502,GO:…	ko:K03549
spt_1022988	pentatricopeptide repeatcontaining protein At4g35850	GO:0003674,GO:0003676,GO:0003723,GO:0003727,GO:0003729,GO:0003735,GO:0003824,GO:0004518,GO:0004519,GO:0005488,GO:0005515,GO:0005575,GO:0005622,GO:0005623,GO:0005737,GO:0005739,GO:0005783,GO:0006139,GO:0006725,GO:0006807,GO:0008150,GO:0008152,GO:0009451,GO:0009507,GO:0009793,GO:0009987,GO:0016020,GO:0016070,GO:0016554,GO:0016787,GO:0016788,GO:0022626,GO:0034641,GO:0043170,GO:0043226,GO:0043227,GO:…	-
spt_1022989	LOC100250716 isoform X1	GO:0000123,GO:0000124,GO:0003924,GO:0005525,GO:0005575,GO:0005622,GO:0005623,GO:0005634,GO:0005654,GO:0006139,GO:0006325,GO:0006351,GO:0006355,GO:0006464,GO:0006473,GO:0006475,GO:0006725,GO:0006807,GO:0006950,GO:0006970,GO:0006996,GO:0008150,GO:0008152,GO:0009058,GO:0009059,GO:0009628,GO:0009651,GO:0009889,GO:0009987,GO:0010467,GO:0010468,GO:0010556,GO:0016043,GO:0016070,GO:0016569,GO:0016570,GO:…	ko:K11364
spt_1022990	elongation factor Tu, chloroplasticlike	GO:0000166,GO:0001882,GO:0001883,GO:0003674,GO:0003676,GO:0003723,GO:0003746,GO:0003824,GO:0003924,GO:0005488,GO:0005525,GO:0005575,GO:0005622,GO:0005623,GO:0005737,GO:0005739,GO:0006412,GO:0006414,GO:0006518,GO:0006807,GO:0008135,GO:0008150,GO:0008152,GO:0009058,GO:0009059,GO:0009507,GO:0009536,GO:0009987,GO:0010467,GO:0016462,GO:0016787,GO:0016817,GO:0016818,GO:0017076,GO:0017111,GO:0019001,GO:…	ko:K02358
spt_1022991	LINE1 reverse transcriptaselike	GO:0003964,GO:0006278,GO:0016020	-
spt_1022992	CK203_052755	-	-
spt_1022993	LOC104881534	-	-
spt_1022994	CK203_091717	-	-
spt_1022995	-	GO:0000166,GO:0001882,GO:0001883,GO:0003674,GO:0003824,GO:0004845,GO:0004849,GO:0005488,GO:0005524,GO:0005525,GO:0005575,GO:0005622,GO:0005623,GO:0005737,GO:0005768,GO:0005802,GO:0005829,GO:0006139,GO:0006206,GO:0006213,GO:0006220,GO:0006221,GO:0006222,GO:0006241,GO:0006725,GO:0006753,GO:0006793,GO:0006796,GO:0006807,GO:0008144,GO:0008150,GO:0008152,GO:0008168,GO:0008655,GO:0009058,GO:0009112,GO:…	ko:K00876
spt_1023397	CK203_041649	-	-
spt_1023515	CK203_026462	GO:0000959,GO:0003674,GO:0003676,GO:0003723,GO:0003824,GO:0004518,GO:0004519,GO:0005488,GO:0005575,GO:0005622,GO:0005623,GO:0005737,GO:0005739,GO:0006139,GO:0006725,GO:0006807,GO:0007154,GO:0007165,GO:0008150,GO:0008152,GO:0009451,GO:0009743,GO:0009756,GO:0009987,GO:0010033,GO:0010182,GO:0016070,GO:0016071,GO:0016556,GO:0016787,GO:0016788,GO:0023052,GO:0034641,GO:0042221,GO:0043170,GO:0043226,GO:…	-
spt_1023598	LOC117932470	GO:0005783,GO:0009536,GO:0016020	ko:K03686
spt_1023707	VITISV_018480	GO:0004842,GO:0008270,GO:0009987,GO:0016020,GO:0016567,GO:0046872	-
spt_1023708	Kinesinlike protein KIN10B	-	-
spt_1023709	VITISV_043137	-	ko:K20478
spt_1024050	axial regulator YABBY 1 isoform X2	GO:0000003,GO:0000976,GO:0001708,GO:0003002,GO:0003006,GO:0003674,GO:0003676,GO:0003677,GO:0003700,GO:0005488,GO:0005575,GO:0005622,GO:0005623,GO:0005634,GO:0006355,GO:0007275,GO:0007389,GO:0008150,GO:0009653,GO:0009791,GO:0009798,GO:0009888,GO:0009889,GO:0009908,GO:0009909,GO:0009933,GO:0009943,GO:0009944,GO:0009955,GO:0009987,GO:0010093,GO:0010154,GO:0010158,GO:0010229,GO:0010450,GO:0010468,GO:…	-
spt_1024051	protein GRAVITROPIC IN THE LIGHT 1like	GO:0009639,GO:0009959	-
spt_1025134	-	GO:0000166,GO:0003674,GO:0003824,GO:0003951,GO:0004143,GO:0004672,GO:0004674,GO:0005488,GO:0005524,GO:0005575,GO:0005622,GO:0005623,GO:0006464,GO:0006468,GO:0006793,GO:0006796,GO:0006807,GO:0007154,GO:0007165,GO:0007186,GO:0007205,GO:0008144,GO:0008150,GO:0008152,GO:0008289,GO:0009653,GO:0009987,GO:0016020,GO:0016301,GO:0016310,GO:0016740,GO:0016772,GO:0016773,GO:0017076,GO:0019538,GO:0019992,GO:…	ko:K00901
spt_1025513	Stilbene synthase 4	GO:0003674,GO:0003824,GO:0005575,GO:0005622,GO:0005623,GO:0005737,GO:0006950,GO:0006952,GO:0008150,GO:0008152,GO:0009058,GO:0009812,GO:0009813,GO:0009987,GO:0016210,GO:0016740,GO:0016746,GO:0016747,GO:0044424,GO:0044464,GO:0050350,GO:0050896,GO:0071704,GO:1901576	ko:K00660,ko:K13232
spt_1025514	unnamed	GO:0003674,GO:0003824,GO:0005575,GO:0005622,GO:0005623,GO:0005737,GO:0006950,GO:0006952,GO:0008150,GO:0008152,GO:0009058,GO:0009812,GO:0009813,GO:0009987,GO:0016210,GO:0016740,GO:0016746,GO:0016747,GO:0030639,GO:0044424,GO:0044464,GO:0050350,GO:0050896,GO:0071704,GO:1901576	ko:K00660,ko:K13232
spt_1026867	-	GO:0003676,GO:0005634,GO:0006355,GO:0008270	-
spt_1026869	SNAP25 homologous protein SNAP33	GO:0000278,GO:0000281,GO:0000910,GO:0000911,GO:0001101,GO:0003674,GO:0005484,GO:0005488,GO:0005515,GO:0005575,GO:0005622,GO:0005623,GO:0005737,GO:0005886,GO:0006810,GO:0007049,GO:0008104,GO:0008150,GO:0009504,GO:0009507,GO:0009536,GO:0009605,GO:0009607,GO:0009612,GO:0009628,GO:0009719,GO:0009725,GO:0009737,GO:0009987,GO:0010033,GO:0015031,GO:0015833,GO:0016020,GO:0016021,GO:0016043,GO:0016192,GO:…	ko:K08509,ko:K18211
spt_1026870	inactive histonelysine Nmethyltransferase 2Elike	-	-
spt_1026872	heparanaselike protein 1	GO:0004566,GO:0009505,GO:0016020,GO:0016798	ko:K07964
spt_1026873	LOC100262175 isoform X1	-	-
spt_1027180	CK203_053879	GO:0008168,GO:0008169,GO:0008757,GO:0009058,GO:0009987,GO:0016020,GO:0032259,GO:0052667	-
spt_1027181	haloacid dehalogenaselike hydrolase domaincontaining protein At3g48420	GO:0003674,GO:0003824,GO:0005488,GO:0005575,GO:0005622,GO:0005623,GO:0005737,GO:0005886,GO:0008150,GO:0008152,GO:0008531,GO:0009507,GO:0009526,GO:0009532,GO:0009536,GO:0009570,GO:0009941,GO:0016787,GO:0031967,GO:0031975,GO:0043167,GO:0043169,GO:0043226,GO:0043227,GO:0043229,GO:0043231,GO:0044422,GO:0044424,GO:0044434,GO:0044435,GO:0044444,GO:0044446,GO:0044464,GO:0046872	-
spt_1027182	VITISV_015577	-	-
spt_1028185	Fbox protein At1g47056	GO:0002215,GO:0003674,GO:0003824,GO:0004842,GO:0005515,GO:0005777,GO:0005886,GO:0006355,GO:0006464,GO:0006511,GO:0006807,GO:0008150,GO:0008152,GO:0008284,GO:0009987,GO:0016567,GO:0016740,GO:0019005,GO:0019538,GO:0019787,GO:0031146,GO:0032446,GO:0036211,GO:0043170,GO:0043412,GO:0044237,GO:0044238,GO:0044260,GO:0044267,GO:0070647,GO:0071704,GO:0140096,GO:1901564	ko:K10268,ko:K10273
spt_1028188	leucinerich repeat extensinlike protein 3	GO:0005515	-
spt_1028190	lowtemperatureinduced cysteine proteinase	GO:0000323,GO:0000932,GO:0003674,GO:0003824,GO:0004175,GO:0004197,GO:0005575,GO:0005576,GO:0005615,GO:0005622,GO:0005623,GO:0005737,GO:0005764,GO:0005773,GO:0005794,GO:0005911,GO:0006508,GO:0006807,GO:0006950,GO:0006952,GO:0008150,GO:0008152,GO:0008233,GO:0008234,GO:0009056,GO:0009057,GO:0009506,GO:0009507,GO:0009536,GO:0009605,GO:0009607,GO:0009620,GO:0009987,GO:0010494,GO:0012505,GO:0016020,GO:…	-
spt_1028192	probable WRKY transcription factor 7	GO:0003674,GO:0003676,GO:0003677,GO:0003700,GO:0005488,GO:0005515,GO:0005516,GO:0005575,GO:0005622,GO:0005623,GO:0005634,GO:0006139,GO:0006351,GO:0006355,GO:0006725,GO:0006807,GO:0008150,GO:0008152,GO:0009058,GO:0009059,GO:0009889,GO:0009987,GO:0010467,GO:0010468,GO:0010556,GO:0016070,GO:0018130,GO:0019219,GO:0019222,GO:0019438,GO:0031323,GO:0031326,GO:0032774,GO:0034641,GO:0034645,GO:0034654,GO:…	-
spt_1028602	kinesinlike protein KIN6 isoform X4	GO:0000166,GO:0000226,GO:0000278,GO:0000280,GO:0003674,GO:0003774,GO:0003777,GO:0003824,GO:0005488,GO:0005515,GO:0005524,GO:0005575,GO:0005622,GO:0005623,GO:0005634,GO:0005737,GO:0005856,GO:0005871,GO:0005874,GO:0005875,GO:0006928,GO:0006996,GO:0007010,GO:0007017,GO:0007018,GO:0007049,GO:0007051,GO:0007052,GO:0007059,GO:0008017,GO:0008092,GO:0008144,GO:0008150,GO:0008526,GO:0008574,GO:0009987,GO:…	ko:K10401
spt_1028603	LOC104880786	GO:0003677,GO:0003824,GO:0003906,GO:0004519,GO:0005634,GO:0006281	-
spt_1028604	receptor protein kinase CLAVATA1	GO:0000003,GO:0000165,GO:0000166,GO:0000325,GO:0002215,GO:0003002,GO:0003006,GO:0003674,GO:0003824,GO:0004663,GO:0004672,GO:0004674,GO:0005102,GO:0005488,GO:0005515,GO:0005524,GO:0005575,GO:0005622,GO:0005623,GO:0005634,GO:0005730,GO:0005737,GO:0005773,GO:0005886,GO:0005911,GO:0006464,GO:0006468,GO:0006793,GO:0006796,GO:0006807,GO:0006952,GO:0007275,GO:0007389,GO:0008144,GO:0008150,GO:0008152,GO:…	ko:K00924
spt_1028786	germinlike protein	GO:0004784,GO:0005539,GO:0005634,GO:0005783,GO:0009408,GO:0009409,GO:0009505,GO:0009611,GO:0009735,GO:0010046,GO:0016020,GO:0030145,GO:0031012,GO:0042542,GO:0048046,GO:0050162,GO:0080042,GO:0090378	-
spt_1028910	LOC117907711 isoform X1	GO:0016020	-
spt_1028911	CK203_057421	-	-
spt_1028912	polyadenylatebinding protein 3	GO:0000184,GO:0000288,GO:0000289,GO:0000956,GO:0003674,GO:0003676,GO:0003723,GO:0003727,GO:0005488,GO:0005575,GO:0005622,GO:0005623,GO:0005634,GO:0005730,GO:0005737,GO:0005829,GO:0006139,GO:0006396,GO:0006397,GO:0006401,GO:0006402,GO:0006412,GO:0006413,GO:0006417,GO:0006518,GO:0006725,GO:0006807,GO:0008143,GO:0008150,GO:0008152,GO:0009056,GO:0009057,GO:0009058,GO:0009059,GO:0009735,GO:0009889,GO:…	ko:K13126
spt_1028913	MRN complexinteracting protein	GO:0003682,GO:0005634,GO:0007095	-
spt_1028914	LOC100242653	GO:0000166,GO:0000287,GO:0003674,GO:0003824,GO:0004422,GO:0005488,GO:0005524,GO:0005575,GO:0005622,GO:0005623,GO:0005737,GO:0005829,GO:0006139,GO:0006163,GO:0006164,GO:0006166,GO:0006178,GO:0006188,GO:0006396,GO:0006399,GO:0006725,GO:0006753,GO:0006793,GO:0006796,GO:0006807,GO:0008033,GO:0008144,GO:0008150,GO:0008152,GO:0009058,GO:0009116,GO:0009117,GO:0009119,GO:0009123,GO:0009124,GO:0009126,GO:…	ko:K00760
spt_1029019	GTPbinding protein SAR1A	GO:0003400,GO:0003924,GO:0005525,GO:0005783,GO:0005794,GO:0006886,GO:0016050,GO:0016192,GO:0030127,GO:0045324,GO:0061024	ko:K07953
spt_1029020	FHA domaincontaining protein PS1	GO:0000003,GO:0003674,GO:0003676,GO:0003677,GO:0003723,GO:0003729,GO:0003824,GO:0004518,GO:0004519,GO:0004540,GO:0004857,GO:0004864,GO:0004865,GO:0005488,GO:0005515,GO:0005575,GO:0005622,GO:0005623,GO:0005634,GO:0005654,GO:0005681,GO:0005737,GO:0006139,GO:0006351,GO:0006355,GO:0006396,GO:0006397,GO:0006401,GO:0006725,GO:0006807,GO:0007049,GO:0007275,GO:0008150,GO:0008152,GO:0008283,GO:0008380,GO:…	-
spt_1029021	LOW QUALITY PROTEIN: protein SENSITIVE TO PROTON RHIZOTOXICITY 1like	GO:0003674,GO:0003676,GO:0003700,GO:0005488,GO:0005575,GO:0005622,GO:0005623,GO:0005634,GO:0006139,GO:0006351,GO:0006355,GO:0006725,GO:0006807,GO:0006950,GO:0008150,GO:0008152,GO:0009058,GO:0009059,GO:0009268,GO:0009628,GO:0009889,GO:0009891,GO:0009893,GO:0009987,GO:0010035,GO:0010038,GO:0010044,GO:0010447,GO:0010467,GO:0010468,GO:0010556,GO:0010557,GO:0010604,GO:0010628,GO:0016070,GO:0018130,GO:…	-
spt_1029022	tetratricopeptide repeat domaincontaining protein PYG7, chloroplasticlike isoform X1	GO:0003727,GO:0003735,GO:0005515,GO:0005575,GO:0005622,GO:0005623,GO:0005737,GO:0006091,GO:0006620,GO:0008150,GO:0008152,GO:0009507,GO:0009534,GO:0009535,GO:0009536,GO:0009579,GO:0009737,GO:0009793,GO:0009987,GO:0015979,GO:0016020,GO:0016021,GO:0016043,GO:0016740,GO:0019684,GO:0022607,GO:0031224,GO:0031976,GO:0031984,GO:0034357,GO:0034622,GO:0042651,GO:0043226,GO:0043227,GO:0043229,GO:0043231,GO:…	ko:K02717
spt_1029085	LOC117907132	-	-
spt_1030674	VITISV_030783	GO:0000287,GO:0003674,GO:0003824,GO:0005488,GO:0005575,GO:0005622,GO:0005623,GO:0005737,GO:0005777,GO:0006629,GO:0006720,GO:0006721,GO:0008150,GO:0008152,GO:0008299,GO:0008610,GO:0009058,GO:0009987,GO:0010333,GO:0010334,GO:0016020,GO:0016114,GO:0016829,GO:0016835,GO:0016838,GO:0034004,GO:0043167,GO:0043169,GO:0044237,GO:0044238,GO:0044249,GO:0044255,GO:0044424,GO:0044464,GO:0046872,GO:0052577,GO:…	ko:K14181,ko:K15803
spt_1030675	VITISV_030783	GO:0000287,GO:0003674,GO:0003824,GO:0005488,GO:0005575,GO:0005622,GO:0005623,GO:0005737,GO:0005777,GO:0006629,GO:0006720,GO:0006721,GO:0008150,GO:0008152,GO:0008299,GO:0008610,GO:0009058,GO:0009987,GO:0010333,GO:0010334,GO:0016020,GO:0016114,GO:0016829,GO:0016835,GO:0016838,GO:0034004,GO:0043167,GO:0043169,GO:0044237,GO:0044238,GO:0044249,GO:0044255,GO:0044424,GO:0044464,GO:0046872,GO:0052577,GO:…	ko:K14181,ko:K15803
spt_1031159	CK203_041119	-	-
spt_1031160	CK203_060492	-	-
spt_1031161	VITISV_003642	-	-
spt_1031461	Retrovirusrelated Pol polyprotein	GO:0003674,GO:0003676,GO:0003824,GO:0004190,GO:0004553,GO:0004565,GO:0005488,GO:0005575,GO:0005576,GO:0005618,GO:0005622,GO:0005623,GO:0005737,GO:0005773,GO:0005975,GO:0008150,GO:0008152,GO:0008270,GO:0009987,GO:0015074,GO:0015925,GO:0016787,GO:0016798,GO:0030246,GO:0030312,GO:0043226,GO:0043227,GO:0043229,GO:0043231,GO:0044238,GO:0044424,GO:0044444,GO:0044464,GO:0048046,GO:0071704,GO:0071944	-
spt_1031462	phenylalaninetRNA ligase, chloroplasticmitochondrial isoform X4	GO:0000049,GO:0000166,GO:0003674,GO:0003676,GO:0003723,GO:0003824,GO:0004812,GO:0004826,GO:0005488,GO:0005524,GO:0005575,GO:0005622,GO:0005623,GO:0005737,GO:0005739,GO:0005759,GO:0006082,GO:0006139,GO:0006399,GO:0006412,GO:0006418,GO:0006432,GO:0006518,GO:0006520,GO:0006725,GO:0006807,GO:0008144,GO:0008150,GO:0008152,GO:0009058,GO:0009059,GO:0009507,GO:0009532,GO:0009536,GO:0009570,GO:0009987,GO:…	ko:K01889
spt_1031463	ribonuclease H protein	GO:0000049,GO:0000166,GO:0003674,GO:0003676,GO:0003723,GO:0003824,GO:0004812,GO:0004826,GO:0005488,GO:0005524,GO:0005575,GO:0005622,GO:0005623,GO:0005737,GO:0005739,GO:0005759,GO:0006082,GO:0006139,GO:0006399,GO:0006412,GO:0006418,GO:0006432,GO:0006518,GO:0006520,GO:0006725,GO:0006807,GO:0008144,GO:0008150,GO:0008152,GO:0009058,GO:0009059,GO:0009507,GO:0009532,GO:0009536,GO:0009570,GO:0009987,GO:…	ko:K01889
spt_1031464	Cullinassociated NEDD8dissociated protein 1	-	ko:K12598
spt_1031465	disease resistance protein RGA4 isoform X4	-	-
spt_2000095	VITISV_042091	-	-
spt_2000775	LOC100246465	GO:0016020	-
spt_2001226	F3Y22.tig00111338pilonHSYRG00289	-	-
spt_2001227	Retrovirusrelated Pol polyprotein	GO:0003676,GO:0003964,GO:0004190,GO:0004519,GO:0006278,GO:0008445,GO:0015074,GO:0016020	-
spt_2001553	unnamed	GO:0000977,GO:0003700,GO:0005634,GO:0006355,GO:0009909,GO:0045944,GO:0046983	ko:K09264
spt_2001555	VITISV_031399	-	ko:K17710
spt_2001556	Retrovirusrelated Pol polyprotein	-	-
spt_2002222	protein YABBY 4	GO:0003674,GO:0005488,GO:0005575,GO:0005622,GO:0005623,GO:0005634,GO:0007275,GO:0008150,GO:0009944,GO:0009987,GO:0010154,GO:0010158,GO:0030154,GO:0032501,GO:0032502,GO:0043167,GO:0043169,GO:0043226,GO:0043227,GO:0043229,GO:0043231,GO:0044424,GO:0044464,GO:0046872,GO:0048856,GO:0048869,GO:1902183,GO:2000024	-
spt_2002807	methanol Oanthraniloyltransferase	GO:0009836	ko:K19861
spt_2003608	LOC104882757	GO:0003677,GO:0046872	-
spt_2003610	methylthioribose kinaselike	GO:0000096,GO:0000097,GO:0000166,GO:0000302,GO:0003674,GO:0003824,GO:0005488,GO:0005515,GO:0005524,GO:0005575,GO:0005622,GO:0005623,GO:0005730,GO:0005737,GO:0005829,GO:0006082,GO:0006520,GO:0006555,GO:0006790,GO:0006793,GO:0006796,GO:0006807,GO:0006950,GO:0006979,GO:0008144,GO:0008150,GO:0008152,GO:0008652,GO:0009058,GO:0009066,GO:0009067,GO:0009086,GO:0009719,GO:0009723,GO:0009725,GO:0009987,GO:…	ko:K00899
spt_2003611	methylthioribose kinaselike	GO:0000096,GO:0000097,GO:0000166,GO:0000302,GO:0003674,GO:0003824,GO:0005488,GO:0005515,GO:0005524,GO:0005575,GO:0005622,GO:0005623,GO:0005730,GO:0005737,GO:0005829,GO:0006082,GO:0006520,GO:0006555,GO:0006790,GO:0006793,GO:0006796,GO:0006807,GO:0006950,GO:0006979,GO:0008144,GO:0008150,GO:0008152,GO:0008652,GO:0009058,GO:0009066,GO:0009067,GO:0009086,GO:0009719,GO:0009723,GO:0009725,GO:0009987,GO:…	ko:K00899
spt_2003613	Basic secretory protease	GO:0006508,GO:0008233,GO:0009987,GO:0016020	-
spt_2003614	VITISV_038846	GO:0005840,GO:0006508,GO:0008233,GO:0009987,GO:0016301	-
spt_2003615	Basic secretory protease	-	-
spt_2003710	cysteinerich and transmembrane domaincontaining protein WIH2like	GO:0000003,GO:0003006,GO:0005575,GO:0005623,GO:0005886,GO:0007049,GO:0007275,GO:0008150,GO:0009553,GO:0009554,GO:0009987,GO:0016020,GO:0016021,GO:0019953,GO:0022402,GO:0022414,GO:0031224,GO:0032501,GO:0032502,GO:0034293,GO:0043934,GO:0044425,GO:0044464,GO:0044703,GO:0048229,GO:0048236,GO:0048856,GO:0048869,GO:0051321,GO:0051704,GO:0071944,GO:1903046	-
spt_2004733	protein ECERIFERUM 26like	GO:0003674,GO:0003735,GO:0003824,GO:0005737,GO:0005840,GO:0006412,GO:0006807,GO:0008150,GO:0008152,GO:0009820,GO:0009836,GO:0016740,GO:0016746,GO:0016747,GO:0050636,GO:0071704,GO:1901564,GO:1990904	-
spt_2004734	VITISV_025154	GO:0016020	-
spt_2004736	VITISV_025979	-	-
spt_2005075	probable acylactivating enzyme 6	GO:0000166,GO:0003674,GO:0003824,GO:0005575,GO:0005622,GO:0005623,GO:0005737,GO:0005777,GO:0005829,GO:0006082,GO:0006629,GO:0006631,GO:0008150,GO:0008152,GO:0009698,GO:0009987,GO:0016874,GO:0019752,GO:0032787,GO:0035639,GO:0042579,GO:0043226,GO:0043227,GO:0043229,GO:0043231,GO:0043436,GO:0044237,GO:0044238,GO:0044255,GO:0044281,GO:0044424,GO:0044444,GO:0044464,GO:0071704,GO:0097367,GO:0140657	-
spt_2005824	autophagyrelated protein 13b	GO:0000045,GO:0000407,GO:0000423,GO:0005575,GO:0005622,GO:0005623,GO:0005737,GO:0005773,GO:0005776,GO:0005829,GO:0006810,GO:0006914,GO:0008104,GO:0008150,GO:0008152,GO:0009056,GO:0009987,GO:0015031,GO:0015833,GO:0019887,GO:0031410,GO:0031982,GO:0032991,GO:0033036,GO:0034497,GO:0034727,GO:0042886,GO:0043226,GO:0043227,GO:0043229,GO:0043231,GO:0044237,GO:0044248,GO:0044424,GO:0044444,GO:0044464,GO:…	ko:K08331
spt_2005825	LOC104879198	-	-
spt_2005826	LOC104879197	-	-
spt_2007121	ribonuclease H protein	-	ko:K00949
spt_2007182	Retrovirusrelated Pol polyprotein	-	-
spt_2007353	ribonuclease H protein	GO:0016020	-
spt_2007354	ribonuclease H protein	-	-
spt_2007356	plant UBX domaincontaining protein 11	GO:0005515,GO:0005575,GO:0005622,GO:0005623,GO:0005737,GO:0005783,GO:0005789,GO:0006355,GO:0006357,GO:0006508,GO:0006511,GO:0006807,GO:0006950,GO:0006986,GO:0008150,GO:0008152,GO:0009056,GO:0009057,GO:0009889,GO:0009891,GO:0009893,GO:0009987,GO:0010033,GO:0010243,GO:0010468,GO:0010498,GO:0010556,GO:0010557,GO:0010604,GO:0010628,GO:0012505,GO:0016020,GO:0019219,GO:0019222,GO:0019538,GO:0019941,GO:…	-
spt_2007947	calciumdependent protein kinase 8like isoform X1	GO:0000166,GO:0001101,GO:0002215,GO:0003674,GO:0003824,GO:0004672,GO:0004674,GO:0004683,GO:0005488,GO:0005509,GO:0005515,GO:0005516,GO:0005524,GO:0005575,GO:0005622,GO:0005623,GO:0005634,GO:0005730,GO:0005737,GO:0005886,GO:0006338,GO:0006464,GO:0006468,GO:0006793,GO:0006796,GO:0006807,GO:0007154,GO:0007165,GO:0008144,GO:0008150,GO:0008152,GO:0009719,GO:0009725,GO:0009737,GO:0009738,GO:0009755,GO:…	ko:K13412
spt_2007949	midasin	GO:0000785,GO:0005634,GO:0016020	-
spt_2007950	sulfite reductase 1	GO:0000103,GO:0003674,GO:0003676,GO:0003677,GO:0003690,GO:0003824,GO:0005488,GO:0005507,GO:0005575,GO:0005576,GO:0005622,GO:0005623,GO:0005737,GO:0006139,GO:0006259,GO:0006260,GO:0006275,GO:0006323,GO:0006355,GO:0006725,GO:0006790,GO:0006807,GO:0006950,GO:0006970,GO:0006996,GO:0008150,GO:0008152,GO:0009058,GO:0009059,GO:0009266,GO:0009295,GO:0009337,GO:0009409,GO:0009507,GO:0009526,GO:0009532,GO:…	ko:K00392
spt_2008460	Retrovirusrelated Pol polyprotein	GO:0003676,GO:0004190,GO:0008270,GO:0009987,GO:0015074,GO:0016020	-
spt_2008557	Pentatricopeptide repeatcontaining protein ELI1, chloroplastic	GO:0003723,GO:0003727,GO:0003735,GO:0005515,GO:0005739,GO:0005783,GO:0008270,GO:0009451,GO:0009507,GO:0009793,GO:0009987,GO:0016020,GO:0016554,GO:0019904,GO:0022626,GO:0080156	-
spt_2008558	spermidine coumaroylCoA acyltransferase	GO:0003674,GO:0003824,GO:0006576,GO:0006595,GO:0006596,GO:0006629,GO:0006720,GO:0006721,GO:0006807,GO:0008150,GO:0008152,GO:0008216,GO:0008299,GO:0008374,GO:0008610,GO:0009058,GO:0009308,GO:0009309,GO:0009723,GO:0009987,GO:0016101,GO:0016102,GO:0016114,GO:0016407,GO:0016410,GO:0016413,GO:0016740,GO:0016746,GO:0016747,GO:0017144,GO:0034641,GO:0042401,GO:0042616,GO:0042617,GO:0044106,GO:0044237,GO:…	ko:K20239,ko:K20240
spt_2008559	alanineglyoxylate aminotransferase 2 homolog 2	GO:0005739,GO:0005774,GO:0008483,GO:0030170	ko:K00827
spt_2008696	E3 ubiquitinprotein ligase PUB23	GO:0001101,GO:0003674,GO:0003824,GO:0004842,GO:0005575,GO:0005622,GO:0005623,GO:0005737,GO:0005829,GO:0006464,GO:0006807,GO:0006950,GO:0006952,GO:0008150,GO:0008152,GO:0009414,GO:0009415,GO:0009628,GO:0009987,GO:0010033,GO:0010035,GO:0010200,GO:0010243,GO:0016567,GO:0016740,GO:0016874,GO:0019538,GO:0019787,GO:0032446,GO:0036211,GO:0042221,GO:0042493,GO:0043170,GO:0043412,GO:0044237,GO:0044238,GO:…	-
spt_2008796	PREDICTED:	GO:0016020,GO:0016491	ko:K15095
spt_2008894	CK203_107745	GO:0000976,GO:0001067,GO:0003690,GO:0003700,GO:0005634,GO:0006355,GO:0043565	-
spt_2009125	protein RETICULATARELATED 1, chloroplastic	GO:0005575,GO:0005622,GO:0005623,GO:0005737,GO:0005739,GO:0007275,GO:0008150,GO:0009507,GO:0009526,GO:0009528,GO:0009536,GO:0009706,GO:0009941,GO:0016020,GO:0016021,GO:0019866,GO:0031090,GO:0031224,GO:0031967,GO:0031969,GO:0031975,GO:0032501,GO:0032502,GO:0042170,GO:0043226,GO:0043227,GO:0043229,GO:0043231,GO:0044422,GO:0044424,GO:0044425,GO:0044434,GO:0044435,GO:0044444,GO:0044446,GO:0044464,GO:…	-
spt_2009126	VITISV_031174	-	-
spt_2009243	AC transposase	GO:0046983	-
spt_2011155	LOC104880464	GO:0005575,GO:0005622,GO:0005623,GO:0005737,GO:0005739,GO:0043226,GO:0043227,GO:0043229,GO:0043231,GO:0044424,GO:0044444,GO:0044464	ko:K22382
spt_2011157	peptidylprolyl cistrans isomerase CYP65 isoform X1	GO:0000209,GO:0000413,GO:0003674,GO:0003755,GO:0003824,GO:0004842,GO:0005575,GO:0005622,GO:0005623,GO:0005634,GO:0006457,GO:0006464,GO:0006807,GO:0008150,GO:0008152,GO:0009987,GO:0016567,GO:0016740,GO:0016853,GO:0016859,GO:0018193,GO:0018208,GO:0019538,GO:0019787,GO:0032446,GO:0034450,GO:0036211,GO:0043170,GO:0043226,GO:0043227,GO:0043229,GO:0043231,GO:0043412,GO:0044237,GO:0044238,GO:0044260,GO:…	ko:K10598
spt_2011158	LOC100855004	GO:0016020	-
spt_2011159	adenylylsulfate kinase 3 isoform X1	GO:0000096,GO:0000097,GO:0000103,GO:0000166,GO:0003674,GO:0003824,GO:0004020,GO:0005488,GO:0005524,GO:0005575,GO:0005622,GO:0005623,GO:0005737,GO:0005829,GO:0006082,GO:0006520,GO:0006534,GO:0006790,GO:0006793,GO:0006796,GO:0006807,GO:0008144,GO:0008150,GO:0008152,GO:0008652,GO:0009058,GO:0009069,GO:0009070,GO:0009403,GO:0009404,GO:0009507,GO:0009536,GO:0009987,GO:0016020,GO:0016053,GO:0016301,GO:…	ko:K00860
spt_2011235	cytochrome P450 81E8	GO:0004497,GO:0005506,GO:0009987,GO:0016020,GO:0016705,GO:0020037,GO:0044550	ko:K00512,ko:K13260,ko:K20623
spt_2011441	probable WRKY transcription factor 13	GO:0000976,GO:0000977,GO:0000978,GO:0000987,GO:0001012,GO:0001067,GO:0003674,GO:0003676,GO:0003677,GO:0003690,GO:0003700,GO:0005488,GO:0005515,GO:0005575,GO:0005622,GO:0005623,GO:0005634,GO:0006139,GO:0006351,GO:0006355,GO:0006725,GO:0006807,GO:0008150,GO:0008152,GO:0009058,GO:0009059,GO:0009889,GO:0009891,GO:0009893,GO:0009987,GO:0010467,GO:0010468,GO:0010556,GO:0010557,GO:0010604,GO:0010628,GO:…	-
spt_2011442	systemin receptor SR160	GO:0000003,GO:0000166,GO:0000226,GO:0001578,GO:0002215,GO:0003006,GO:0003674,GO:0003824,GO:0004663,GO:0004672,GO:0004674,GO:0004713,GO:0004714,GO:0004888,GO:0005488,GO:0005496,GO:0005515,GO:0005524,GO:0005575,GO:0005622,GO:0005623,GO:0005634,GO:0005730,GO:0005737,GO:0005768,GO:0005886,GO:0006338,GO:0006464,GO:0006468,GO:0006793,GO:0006796,GO:0006807,GO:0006950,GO:0006952,GO:0006996,GO:0007010,GO:…	ko:K13415
spt_2011443	UDPgalactose transporter 2	GO:0000139,GO:0003674,GO:0005215,GO:0005338,GO:0005459,GO:0005575,GO:0005622,GO:0005623,GO:0005737,GO:0005794,GO:0006810,GO:0006811,GO:0006820,GO:0008150,GO:0008643,GO:0012505,GO:0015165,GO:0015291,GO:0015297,GO:0015711,GO:0015780,GO:0015931,GO:0015932,GO:0016020,GO:0016021,GO:0022804,GO:0022857,GO:0031090,GO:0031224,GO:0031984,GO:0034220,GO:0043226,GO:0043227,GO:0043229,GO:0043231,GO:0044422,GO:…	ko:K15285
spt_2011444	CK203_001948	GO:0003677,GO:0046872	ko:K15308
spt_2011445	mRNA decay activator protein ZFP36	GO:0003677,GO:0003729,GO:0005773,GO:0010629,GO:0046872	ko:K15308
spt_2011446	ubiquitin carboxylterminal hydrolase 27 isoform X1	GO:0003674,GO:0003824,GO:0004843,GO:0005515,GO:0005575,GO:0005634,GO:0005829,GO:0006464,GO:0006508,GO:0006511,GO:0006807,GO:0008150,GO:0008152,GO:0008233,GO:0008234,GO:0009056,GO:0009057,GO:0009987,GO:0016020,GO:0016021,GO:0016579,GO:0016787,GO:0019538,GO:0019783,GO:0019941,GO:0030163,GO:0031224,GO:0031647,GO:0036211,GO:0036459,GO:0043170,GO:0043412,GO:0043632,GO:0044237,GO:0044238,GO:0044248,GO:…	ko:K11851
spt_2011447	VITISV_026073	-	-
spt_2011878	LOC100261548 isoform X1	GO:0001671,GO:0008289,GO:0016020,GO:0016301,GO:0044571,GO:0051087,GO:0051259	-
spt_2011879	betaxylosidasealphaLarabinofuranosidase 2	GO:0000272,GO:0002376,GO:0003674,GO:0003824,GO:0004553,GO:0005575,GO:0005576,GO:0005618,GO:0005623,GO:0005975,GO:0005976,GO:0006950,GO:0006952,GO:0006955,GO:0008150,GO:0008152,GO:0008422,GO:0009044,GO:0009056,GO:0009057,GO:0009605,GO:0009607,GO:0009627,GO:0009814,GO:0009987,GO:0010383,GO:0010410,GO:0016020,GO:0016052,GO:0016787,GO:0016798,GO:0030312,GO:0031221,GO:0031222,GO:0043170,GO:0043207,GO:…	ko:K15920
spt_2011880	-	GO:0005524,GO:0005634,GO:0009506,GO:0014065	ko:K10841
spt_2011911	axial regulator YABBY 5like isoform X2	GO:0000976,GO:0005634,GO:0007275,GO:0010158	-
spt_2011912	Retrovirusrelated Pol polyprotein	-	-
spt_2013182	60S ribosomal protein L211	GO:0003674,GO:0003735,GO:0005198,GO:0005575,GO:0005622,GO:0005623,GO:0005737,GO:0005829,GO:0005840,GO:0006412,GO:0006518,GO:0006807,GO:0008150,GO:0008152,GO:0009058,GO:0009059,GO:0009987,GO:0010467,GO:0015934,GO:0019538,GO:0022625,GO:0022626,GO:0032991,GO:0034641,GO:0034645,GO:0043043,GO:0043170,GO:0043226,GO:0043228,GO:0043229,GO:0043232,GO:0043603,GO:0043604,GO:0044237,GO:0044238,GO:0044249,GO:…	ko:K02889
spt_2015443	LOC100261868 isoform X2	GO:0000813,GO:0005575,GO:0005622,GO:0005623,GO:0005737,GO:0005768,GO:0005794,GO:0005802,GO:0006508,GO:0006511,GO:0006807,GO:0006810,GO:0006886,GO:0007034,GO:0008104,GO:0008150,GO:0008152,GO:0009056,GO:0009057,GO:0009987,GO:0010008,GO:0012505,GO:0015031,GO:0015833,GO:0016020,GO:0016192,GO:0016197,GO:0019538,GO:0019941,GO:0030163,GO:0031090,GO:0031410,GO:0031982,GO:0031984,GO:0032509,GO:0032511,GO:…	ko:K12184
spt_2015444	LOC104880278	GO:0046872	-
spt_2015446	premRNAsplicing factor SYF1	GO:0000349,GO:0000375,GO:0000377,GO:0000393,GO:0000398,GO:0000974,GO:0001701,GO:0001824,GO:0003727,GO:0003735,GO:0005515,GO:0005575,GO:0005622,GO:0005623,GO:0005634,GO:0005681,GO:0005684,GO:0006139,GO:0006259,GO:0006281,GO:0006283,GO:0006289,GO:0006351,GO:0006396,GO:0006397,GO:0006725,GO:0006807,GO:0006950,GO:0006974,GO:0007094,GO:0007275,GO:0007399,GO:0007417,GO:0007420,GO:0008150,GO:0008152,GO:…	ko:K12867
spt_2015447	CK203_094713	-	-
spt_2015448	LOC100244739 isoform X1	GO:0016020	-
spt_2015622	glutamate receptor 2.9like	GO:0016020	ko:K05387
spt_2015624	glutamate receptor 2.9like	GO:0016020	ko:K05387
spt_2015628	Glutamate receptor 2.9	-	ko:K05387
spt_2015629	glutamate receptor 2.7like	GO:0004970,GO:0015276,GO:0016020,GO:0034220	ko:K05387
spt_2016328	-	GO:0003674,GO:0003735,GO:0005198,GO:0005575,GO:0005622,GO:0005623,GO:0005737,GO:0005739,GO:0005773,GO:0005829,GO:0005840,GO:0005844,GO:0006412,GO:0006518,GO:0006807,GO:0008150,GO:0008152,GO:0009058,GO:0009059,GO:0009987,GO:0010467,GO:0015935,GO:0019538,GO:0022626,GO:0022627,GO:0032991,GO:0034641,GO:0034645,GO:0042788,GO:0043043,GO:0043170,GO:0043226,GO:0043227,GO:0043228,GO:0043229,GO:0043231,GO:…	ko:K02957
spt_2016329	CK203_050691	GO:0008289	-
spt_2016511	unnamed	GO:0000060,GO:0001101,GO:0003674,GO:0005048,GO:0005215,GO:0005488,GO:0005515,GO:0005575,GO:0005622,GO:0005623,GO:0005634,GO:0005635,GO:0005737,GO:0006606,GO:0006607,GO:0006610,GO:0006810,GO:0006886,GO:0006913,GO:0008104,GO:0008139,GO:0008150,GO:0008536,GO:0008565,GO:0009719,GO:0009987,GO:0010033,GO:0010243,GO:0012505,GO:0015031,GO:0015833,GO:0016020,GO:0017016,GO:0017038,GO:0019899,GO:0031090,GO:…	ko:K20222
spt_2017135	probable LRR receptorlike serinethreonineprotein kinase At4g36180 isoform X1	GO:0002215,GO:0004663,GO:0005515,GO:0005886,GO:0006952,GO:0010102,GO:0016301,GO:0045177,GO:0048226,GO:0051707	-
spt_2017136	LRR receptorlike serinethreonineprotein kinase GSO1	GO:0005886,GO:0016020,GO:0045177,GO:0048226	-
spt_2017742	(DL)glycerol3phosphatase 1	GO:0000121,GO:0003674,GO:0003824,GO:0005488,GO:0005575,GO:0005622,GO:0005623,GO:0005737,GO:0005739,GO:0005975,GO:0006066,GO:0006071,GO:0006114,GO:0006766,GO:0006767,GO:0006771,GO:0006793,GO:0006796,GO:0006807,GO:0008150,GO:0008152,GO:0009058,GO:0009110,GO:0009231,GO:0009987,GO:0016051,GO:0016311,GO:0016787,GO:0016788,GO:0016791,GO:0017144,GO:0018130,GO:0019400,GO:0019401,GO:0019751,GO:0034637,GO:…	ko:K17623
spt_2018379	LOC104880884	-	-
spt_2018380	aconitate hydratase, cytoplasmic	GO:0000166,GO:0001101,GO:0003674,GO:0003824,GO:0003994,GO:0005488,GO:0005507,GO:0005524,GO:0005575,GO:0005618,GO:0005622,GO:0005623,GO:0005737,GO:0005739,GO:0005773,GO:0005774,GO:0005829,GO:0005975,GO:0006081,GO:0006082,GO:0006091,GO:0006097,GO:0006099,GO:0006101,GO:0006102,GO:0006950,GO:0006970,GO:0006979,GO:0007275,GO:0008144,GO:0008150,GO:0008152,GO:0009060,GO:0009507,GO:0009532,GO:0009536,GO:…	ko:K01681
spt_2018923	TMV resistance protein N isoform X2	GO:0000166,GO:0002218,GO:0002252,GO:0002253,GO:0002376,GO:0002682,GO:0002684,GO:0003674,GO:0005488,GO:0005515,GO:0005524,GO:0005575,GO:0005622,GO:0005623,GO:0005634,GO:0005694,GO:0005737,GO:0005739,GO:0005886,GO:0006950,GO:0006952,GO:0006955,GO:0007154,GO:0007165,GO:0007275,GO:0008144,GO:0008150,GO:0008219,GO:0009314,GO:0009416,GO:0009507,GO:0009605,GO:0009607,GO:0009615,GO:0009617,GO:0009626,GO:…	ko:K16226
spt_2018940	CK203_097796	-	-
spt_2018941	disease resistance RPP13like protein 1	GO:0005515,GO:0005680	ko:K03364
spt_2018943	disease resistance RPP13like protein 1	GO:0000166,GO:0002376,GO:0003674,GO:0005488,GO:0005524,GO:0005575,GO:0005623,GO:0005886,GO:0006950,GO:0006952,GO:0006955,GO:0007154,GO:0007165,GO:0008144,GO:0008150,GO:0008219,GO:0009626,GO:0009987,GO:0012501,GO:0016020,GO:0017076,GO:0023052,GO:0030554,GO:0032553,GO:0032555,GO:0032559,GO:0033554,GO:0034050,GO:0035639,GO:0036094,GO:0043167,GO:0043168,GO:0043531,GO:0044464,GO:0045087,GO:0050789,GO:…	ko:K19613
spt_2019236	Retrovirusrelated Pol polyprotein	GO:0003676,GO:0004190,GO:0009987,GO:0015074	-
spt_2019594	elongator complex protein 6 isoform X1	GO:0002097,GO:0002098,GO:0003674,GO:0003824,GO:0005575,GO:0005622,GO:0005623,GO:0005634,GO:0005737,GO:0006139,GO:0006351,GO:0006355,GO:0006396,GO:0006399,GO:0006400,GO:0006725,GO:0006807,GO:0006950,GO:0006979,GO:0008033,GO:0008150,GO:0008152,GO:0008284,GO:0009058,GO:0009059,GO:0009451,GO:0009536,GO:0009889,GO:0009892,GO:0009926,GO:0009987,GO:0010015,GO:0010016,GO:0010467,GO:0010468,GO:0010556,GO:…	-
spt_2020141	LOC117928614	GO:0031047,GO:0080188	-
spt_2020487	valinetRNA ligase, chloroplasticmitochondrial 2like isoform X1	GO:0000003,GO:0000166,GO:0002161,GO:0003006,GO:0003674,GO:0003824,GO:0004812,GO:0004832,GO:0005488,GO:0005524,GO:0005575,GO:0005622,GO:0005623,GO:0005737,GO:0005739,GO:0005829,GO:0006082,GO:0006139,GO:0006399,GO:0006412,GO:0006418,GO:0006438,GO:0006450,GO:0006518,GO:0006520,GO:0006725,GO:0006807,GO:0007275,GO:0008144,GO:0008150,GO:0008152,GO:0009058,GO:0009059,GO:0009507,GO:0009532,GO:0009536,GO:…	ko:K01873
spt_2020488	Phospholipidtransporting ATPase 2	GO:0000166,GO:0000287,GO:0003674,GO:0003824,GO:0004012,GO:0005215,GO:0005319,GO:0005488,GO:0005524,GO:0005548,GO:0005575,GO:0005622,GO:0005623,GO:0005737,GO:0005768,GO:0005770,GO:0005783,GO:0005789,GO:0005886,GO:0006810,GO:0006811,GO:0006820,GO:0006869,GO:0008144,GO:0008150,GO:0009987,GO:0010008,GO:0010876,GO:0012505,GO:0015711,GO:0015748,GO:0015914,GO:0016020,GO:0016021,GO:0016043,GO:0016462,GO:…	ko:K01530
spt_2020489	VITISV_014707	GO:0003824,GO:0005634	ko:K00703
spt_2020618	Copia protein	GO:0003676,GO:0003964,GO:0004190,GO:0005975,GO:0006259,GO:0008270,GO:0141187	-
spt_2020816	CK203_096194	-	-
spt_2022141	CK203_025281	GO:0016020	-
spt_2022185	Transposon Ty3G GagPol polyprotein	GO:0003676,GO:0003964,GO:0004519,GO:0009987,GO:0015074,GO:0034654	-
spt_2022194	-	GO:0000045,GO:0000422,GO:0000423,GO:0003674,GO:0005488,GO:0005515,GO:0005575,GO:0005622,GO:0005623,GO:0005737,GO:0005739,GO:0005773,GO:0005776,GO:0005829,GO:0005856,GO:0005929,GO:0005930,GO:0006886,GO:0006914,GO:0006950,GO:0006996,GO:0007005,GO:0007033,GO:0007154,GO:0007275,GO:0007399,GO:0008150,GO:0008152,GO:0008285,GO:0009056,GO:0009267,GO:0009605,GO:0009790,GO:0009792,GO:0009888,GO:0009893,GO:…	ko:K17985
spt_2022519	Retrovirusrelated Pol polyprotein	-	-
spt_2023240	LINE1 reverse transcriptaselike	GO:0003964,GO:0006278	-
spt_2023290	VITISV_030500	GO:0016020	-
spt_2023291	CK203_063798	GO:0003676,GO:0009987,GO:0015074	-
spt_2023292	VITISV_036811	-	-
spt_2023293	pentatricopeptide repeatcontaining protein At3g02330	GO:0003723,GO:0003727,GO:0003735,GO:0005515,GO:0005739,GO:0005783,GO:0009507,GO:0009793,GO:0016554,GO:0022626,GO:0080156	-
spt_2023294	pentatricopeptide repeatcontaining protein At3g02330 isoform X2	GO:0000959,GO:0003674,GO:0003676,GO:0003723,GO:0003727,GO:0003735,GO:0003824,GO:0004518,GO:0004519,GO:0005488,GO:0005515,GO:0005575,GO:0005622,GO:0005623,GO:0005737,GO:0005739,GO:0005783,GO:0006139,GO:0006396,GO:0006397,GO:0006725,GO:0006807,GO:0008150,GO:0008152,GO:0009451,GO:0009507,GO:0009793,GO:0009987,GO:0010467,GO:0016070,GO:0016071,GO:0016553,GO:0016554,GO:0016556,GO:0016787,GO:0016788,GO:…	-
spt_2023295	probable glutathione Stransferase	GO:0004364,GO:0005515,GO:0005737,GO:0006749,GO:0009407,GO:0043295,GO:0046256	ko:K00799
spt_2023381	LINE1 retrotransposable element ORF2 protein	-	-
spt_2023432	LOC100258145 isoform X1	-	ko:K22184
spt_2023433	Retrovirusrelated Pol polyprotein	-	-
spt_2023434	Mitochondrial dicarboxylatetricarboxylate transporter DTC	GO:0016020,GO:0022857,GO:0055085	ko:K15104
spt_2023435	VITISV_022267	GO:0016020,GO:0022857,GO:0055085	ko:K15104
spt_2023847	Golgi SNAP receptor complex member 12	GO:0000139,GO:0005484,GO:0005768,GO:0005797,GO:0005801,GO:0006888,GO:0006906,GO:0015031,GO:0031201,GO:0048219	ko:K08495
spt_2024356	LOC117912742	GO:0016020	-
spt_2025264	pentatricopeptide repeatcontaining protein At4g38010	GO:0003674,GO:0003676,GO:0003723,GO:0003727,GO:0003735,GO:0003824,GO:0003924,GO:0004518,GO:0004519,GO:0005488,GO:0005515,GO:0005525,GO:0005575,GO:0005622,GO:0005623,GO:0005739,GO:0005783,GO:0006139,GO:0006725,GO:0006807,GO:0008150,GO:0008152,GO:0008270,GO:0009451,GO:0009507,GO:0009793,GO:0009987,GO:0016070,GO:0016554,GO:0016787,GO:0016788,GO:0022626,GO:0034641,GO:0043170,GO:0043226,GO:0043227,GO:…	-
spt_2025265	LOC100248586	GO:0003674,GO:0003824,GO:0005488,GO:0006732,GO:0006777,GO:0006793,GO:0006796,GO:0006807,GO:0008144,GO:0008150,GO:0008152,GO:0008265,GO:0008483,GO:0009058,GO:0009108,GO:0009987,GO:0016740,GO:0016782,GO:0016783,GO:0018130,GO:0019538,GO:0019637,GO:0019720,GO:0019842,GO:0030151,GO:0030170,GO:0036094,GO:0043167,GO:0043168,GO:0043169,GO:0043170,GO:0043545,GO:0044237,GO:0044238,GO:0044249,GO:0044260,GO:…	-
spt_2025267	Protein HOTHEAD	GO:0016020,GO:0016614,GO:0046593,GO:0050660	ko:K21270
spt_2025268	protein HOTHEADlike	GO:0016020,GO:0016614,GO:0046593,GO:0050660	ko:K21270
spt_2025269	CK203_102897	GO:0016020	-
spt_2025270	pentatricopeptide repeatcontaining protein At2g22410	GO:0003723,GO:0003727,GO:0003735,GO:0005515,GO:0005739,GO:0005783,GO:0008270,GO:0009451,GO:0009507,GO:0009793,GO:0009987,GO:0016020,GO:0016554,GO:0016616,GO:0022626,GO:0080156	ko:K07178
spt_2026595	LYR motifcontaining protein 4	GO:0016226	ko:K22069
spt_2026899	probable UDPNacetylglucosaminepeptide Nacetylglucosaminyltransferase SEC	GO:0000288,GO:0000291,GO:0000785,GO:0000956,GO:0003727,GO:0003735,GO:0005515,GO:0005575,GO:0005622,GO:0005623,GO:0005634,GO:0005654,GO:0005694,GO:0005737,GO:0005829,GO:0006139,GO:0006401,GO:0006402,GO:0006725,GO:0006807,GO:0008150,GO:0008152,GO:0009056,GO:0009057,GO:0009507,GO:0009737,GO:0009793,GO:0009892,GO:0009987,GO:0010468,GO:0010605,GO:0010629,GO:0016070,GO:0016071,GO:0016757,GO:0019222,GO:…	-
spt_2027828	VITISV_030820	GO:0003824,GO:0003906,GO:0004518,GO:0005634,GO:0006281,GO:0046872	ko:K00703
spt_2027910	LINE1 reverse transcriptaselike	GO:0016020,GO:0047429	ko:K08081,ko:K21596
spt_2027912	LOC100267842	GO:0003677,GO:0006355,GO:0016020,GO:0016301	-
spt_2028537	VITISV_022259	-	-
spt_2028539	VITISV_012551	GO:0003674,GO:0003824,GO:0005575,GO:0005622,GO:0005623,GO:0005737,GO:0005975,GO:0005984,GO:0005991,GO:0005992,GO:0006793,GO:0006796,GO:0006950,GO:0008150,GO:0008152,GO:0009058,GO:0009311,GO:0009312,GO:0009987,GO:0016051,GO:0016311,GO:0016740,GO:0016757,GO:0016787,GO:0016788,GO:0016791,GO:0033554,GO:0034637,GO:0042578,GO:0044237,GO:0044238,GO:0044249,GO:0044262,GO:0044424,GO:0044464,GO:0046351,GO:…	ko:K16055
spt_2028541	Retrovirusrelated Pol polyprotein	GO:0001054,GO:0001055,GO:0001056,GO:0001057,GO:0001058,GO:0001059,GO:0001060,GO:0001065,GO:0001066,GO:0006360,GO:0006366,GO:0006383,GO:0006390,GO:0042793,GO:0052923,GO:0052924	-
spt_2028831	laccase15like isoform X1	GO:0004601,GO:0005507,GO:0006979,GO:0009987,GO:0016020,GO:0016491,GO:0020037,GO:0046274,GO:0048046,GO:0052716,GO:0098754	ko:K05909
spt_2028832	unnamed	GO:0003674,GO:0003824,GO:0004601,GO:0005575,GO:0005622,GO:0005623,GO:0005737,GO:0005829,GO:0005886,GO:0008150,GO:0008152,GO:0008379,GO:0009507,GO:0009536,GO:0009636,GO:0009987,GO:0010035,GO:0010038,GO:0016020,GO:0016209,GO:0016491,GO:0016684,GO:0019725,GO:0034599,GO:0042221,GO:0042592,GO:0042744,GO:0043226,GO:0043227,GO:0043229,GO:0043231,GO:0044424,GO:0044444,GO:0044464,GO:0045454,GO:0046686,GO:…	-
spt_2030371	LOW QUALITY PROTEIN:	GO:0000287,GO:0003674,GO:0003824,GO:0005488,GO:0005575,GO:0005622,GO:0005623,GO:0005737,GO:0005777,GO:0006629,GO:0006720,GO:0006721,GO:0008150,GO:0008152,GO:0008299,GO:0008610,GO:0009058,GO:0009987,GO:0010333,GO:0010334,GO:0016020,GO:0016102,GO:0016114,GO:0016829,GO:0016835,GO:0016838,GO:0034004,GO:0043167,GO:0043169,GO:0044237,GO:0044238,GO:0044249,GO:0044255,GO:0044424,GO:0044464,GO:0046872,GO:…	ko:K14181,ko:K15803
spt_2030372	Retrovirusrelated Pol polyprotein	GO:0003964,GO:0006278	-

## Sheet: S8
Table S8. Selected Genes Mediated by Structural Variation in the Vv_cv Population
Gene_ID	Gene_name	GO	KEGG
spt_1000071	unnamed	GO:0000323,GO:0003674,GO:0003824,GO:0004553,GO:0004566,GO:0005575,GO:0005576,GO:0005618,GO:0005622,GO:0005623,GO:0005737,GO:0005764,GO:0005765,GO:0005773,GO:0005774,GO:0009505,GO:0016020,GO:0016787,GO:0016798,GO:0030312,GO:0031090,GO:0043226,GO:0043227,GO:0043229,GO:0043231,GO:0044422,GO:0044424,GO:0044437,GO:0044444,GO:0044446,GO:0044464,GO:0071944,GO:0098588,GO:0098805,GO:0098852	ko:K07964
spt_1000072	arp23 complexactivating protein rickA isoform X1	-	-
spt_1000073	nodulinrelated protein 1	GO:0001101,GO:0002831,GO:0002833,GO:0006950,GO:0006952,GO:0006970,GO:0007154,GO:0007165,GO:0008150,GO:0009266,GO:0009408,GO:0009409,GO:0009605,GO:0009607,GO:0009617,GO:0009628,GO:0009651,GO:0009719,GO:0009725,GO:0009737,GO:0009738,GO:0009755,GO:0009987,GO:0010033,GO:0010115,GO:0023052,GO:0031347,GO:0031349,GO:0032101,GO:0032103,GO:0032870,GO:0033993,GO:0042221,GO:0043207,GO:0043900,GO:0043902,GO:…	-
spt_1000074	26S proteasome nonATPase regulatory subunit 10	GO:0000062,GO:0000502,GO:0000976,GO:0003950,GO:0005515,GO:0005516,GO:0005634,GO:0005737,GO:0005886,GO:0030139,GO:0045944,GO:0070198,GO:0090263,GO:1904355	ko:K06694
spt_1000075	LOC117910071 isoform X1	-	-
spt_1000077	LOC100266199 isoform X1	GO:0003674,GO:0003676,GO:0003677,GO:0003824,GO:0004842,GO:0005488,GO:0005515,GO:0005575,GO:0005622,GO:0005623,GO:0005737,GO:0006464,GO:0006508,GO:0006807,GO:0008150,GO:0008152,GO:0008233,GO:0009368,GO:0009507,GO:0009532,GO:0009536,GO:0009570,GO:0009840,GO:0009987,GO:0016567,GO:0016740,GO:0019538,GO:0019787,GO:0032446,GO:0032991,GO:0036211,GO:0043170,GO:0043226,GO:0043227,GO:0043229,GO:0043231,GO:…	ko:K11940
spt_1000078	pentatricopeptide repeatcontaining protein At1g69350	GO:0003677,GO:0003723,GO:0003727,GO:0003735,GO:0005515,GO:0005739,GO:0005783,GO:0006508,GO:0008233,GO:0008270,GO:0009451,GO:0009507,GO:0009793,GO:0009987,GO:0016554,GO:0022626,GO:0043231,GO:0080156	-
spt_1000079	Pentatricopeptide repeatcontaining protein	GO:0003674,GO:0003676,GO:0003723,GO:0003727,GO:0003735,GO:0003824,GO:0004518,GO:0004519,GO:0005488,GO:0005515,GO:0005575,GO:0005622,GO:0005623,GO:0005737,GO:0005739,GO:0005783,GO:0006139,GO:0006725,GO:0006807,GO:0006979,GO:0008150,GO:0008152,GO:0009451,GO:0009507,GO:0009651,GO:0009737,GO:0009793,GO:0009987,GO:0016070,GO:0016554,GO:0016787,GO:0016788,GO:0022626,GO:0034641,GO:0043170,GO:0043226,GO:…	-
spt_1000080	LOC117916442 isoform X3	GO:0030246	-
spt_1000540	LOC100852986	-	-
spt_1000541	protein PLANT CADMIUM RESISTANCE 2	GO:0016020	-
spt_1000542	Fbox protein SKIP28	GO:0000003,GO:0003006,GO:0005515,GO:0005737,GO:0005777,GO:0005868,GO:0006355,GO:0006464,GO:0006511,GO:0006807,GO:0007017,GO:0007275,GO:0008150,GO:0008152,GO:0008284,GO:0009790,GO:0009791,GO:0009793,GO:0009987,GO:0010154,GO:0016567,GO:0019005,GO:0019538,GO:0022414,GO:0030286,GO:0032446,GO:0032501,GO:0032502,GO:0036211,GO:0043170,GO:0043412,GO:0044237,GO:0044238,GO:0044260,GO:0044267,GO:0048316,GO:…	-
spt_1000543	glucan endo1,3betaglucosidase 3 isoform X1	GO:0004553,GO:0005975,GO:0009987,GO:0016020,GO:0042973,GO:0052861,GO:0071944	ko:K19891
spt_1002308	protein arginine Nmethyltransferase 1.6 isoform X1	GO:0003674,GO:0003824,GO:0004812,GO:0005524,GO:0005575,GO:0005622,GO:0005623,GO:0005737,GO:0005829,GO:0006325,GO:0006338,GO:0006355,GO:0006418,GO:0006464,GO:0006479,GO:0006807,GO:0006996,GO:0008150,GO:0008152,GO:0008168,GO:0008170,GO:0008171,GO:0008213,GO:0008276,GO:0008469,GO:0008757,GO:0009889,GO:0009987,GO:0010468,GO:0010556,GO:0016043,GO:0016273,GO:0016274,GO:0016569,GO:0016570,GO:0016571,GO:…	ko:K11438
spt_1002309	chaperone protein dnaJ 13	GO:0000003,GO:0003006,GO:0005575,GO:0005622,GO:0005623,GO:0005737,GO:0007275,GO:0008150,GO:0009314,GO:0009416,GO:0009536,GO:0009628,GO:0009642,GO:0009791,GO:0010228,GO:0016020,GO:0016021,GO:0022414,GO:0031224,GO:0032501,GO:0032502,GO:0043226,GO:0043227,GO:0043229,GO:0043231,GO:0044424,GO:0044425,GO:0044444,GO:0044464,GO:0048608,GO:0048731,GO:0048856,GO:0050896,GO:0055122,GO:0061458	ko:K09531
spt_1002334	inositol 2dehydrogenase	GO:0000166,GO:0003674,GO:0003824,GO:0008150,GO:0008152,GO:0016491,GO:0050112,GO:0055114	-
spt_1002335	DNA mismatch repair protein MSH4 isoform X1	GO:0000003,GO:0000166,GO:0000228,GO:0000280,GO:0000793,GO:0000794,GO:0000795,GO:0001541,GO:0003006,GO:0003674,GO:0003676,GO:0003677,GO:0003690,GO:0003824,GO:0005488,GO:0005524,GO:0005575,GO:0005622,GO:0005623,GO:0005634,GO:0005694,GO:0005713,GO:0006139,GO:0006259,GO:0006281,GO:0006298,GO:0006310,GO:0006725,GO:0006807,GO:0006950,GO:0006974,GO:0006996,GO:0007049,GO:0007059,GO:0007127,GO:0007129,GO:…	ko:K08740
spt_1002336	Protein transport protein Sec61 subunit alpha	GO:0003674,GO:0005215,GO:0005575,GO:0005622,GO:0005623,GO:0005666,GO:0005737,GO:0005783,GO:0005789,GO:0006383,GO:0006605,GO:0006612,GO:0006620,GO:0006810,GO:0006886,GO:0008104,GO:0008150,GO:0008320,GO:0008565,GO:0012505,GO:0015031,GO:0015399,GO:0015405,GO:0015450,GO:0015833,GO:0016020,GO:0016021,GO:0022804,GO:0022857,GO:0022884,GO:0031204,GO:0031224,GO:0031984,GO:0033036,GO:0033365,GO:0034613,GO:…	ko:K10956
spt_1002337	60S ribosomal protein L151	GO:0002181,GO:0003729,GO:0003735,GO:0005840,GO:0006412,GO:0016020,GO:0022625	ko:K02877
spt_1002338	3isopropylmalate dehydratase small subunit 3	GO:0003674,GO:0003824,GO:0003861,GO:0005575,GO:0005622,GO:0005623,GO:0005737,GO:0006082,GO:0006520,GO:0006551,GO:0006790,GO:0006807,GO:0006950,GO:0006970,GO:0006996,GO:0007275,GO:0008150,GO:0008152,GO:0008652,GO:0009058,GO:0009081,GO:0009082,GO:0009098,GO:0009507,GO:0009532,GO:0009536,GO:0009570,GO:0009628,GO:0009651,GO:0009657,GO:0009658,GO:0009987,GO:0016043,GO:0016053,GO:0016143,GO:0016144,GO:…	ko:K01704,ko:K21359
spt_1002464	novel plant SNARE 11	GO:0000149,GO:0005484,GO:0005789,GO:0005794,GO:0006890,GO:0006906,GO:0009504,GO:0012507,GO:0015031,GO:0031201,GO:0031902	ko:K08494
spt_1002465	probable receptorlike protein kinase At5g47070	GO:0000166,GO:0002215,GO:0003674,GO:0003824,GO:0004672,GO:0004674,GO:0004675,GO:0004888,GO:0005488,GO:0005515,GO:0005524,GO:0005575,GO:0005623,GO:0005634,GO:0005730,GO:0005886,GO:0006464,GO:0006468,GO:0006793,GO:0006796,GO:0006807,GO:0006950,GO:0006952,GO:0007154,GO:0007165,GO:0007166,GO:0007167,GO:0007178,GO:0008144,GO:0008150,GO:0008152,GO:0009987,GO:0016020,GO:0016301,GO:0016310,GO:0016740,GO:…	ko:K00924
spt_1002466	CK203_087327	-	-
spt_1002467	betaamylase 3, chloroplastic	GO:0000024,GO:0000272,GO:0001101,GO:0003674,GO:0003824,GO:0004553,GO:0005575,GO:0005622,GO:0005623,GO:0005634,GO:0005737,GO:0005829,GO:0005975,GO:0005976,GO:0005982,GO:0005983,GO:0006073,GO:0006950,GO:0008150,GO:0008152,GO:0009056,GO:0009057,GO:0009251,GO:0009409,GO:0009414,GO:0009415,GO:0009507,GO:0009536,GO:0009570,GO:0009628,GO:0009987,GO:0010035,GO:0016052,GO:0016160,GO:0016161,GO:0016787,GO:…	ko:K01177
spt_1002468	poly(U)specific endoribonucleaseB	GO:0004521,GO:0016829	ko:K14648
spt_1002759	DEADbox ATPdependent RNA helicase 5	GO:0000166,GO:0000373,GO:0003674,GO:0003676,GO:0003689,GO:0003723,GO:0003724,GO:0003729,GO:0003824,GO:0004004,GO:0004386,GO:0005488,GO:0005524,GO:0005575,GO:0005622,GO:0005623,GO:0005634,GO:0005730,GO:0005737,GO:0005829,GO:0006139,GO:0006338,GO:0006364,GO:0006396,GO:0006725,GO:0006807,GO:0008026,GO:0008144,GO:0008150,GO:0008152,GO:0008186,GO:0009506,GO:0009987,GO:0010467,GO:0010501,GO:0012505,GO:…	ko:K14811
spt_1002760	agamouslike MADSbox protein AGL86	GO:0000976,GO:0000981,GO:0000982,GO:0000987,GO:0001067,GO:0003674,GO:0003676,GO:0003677,GO:0003690,GO:0003700,GO:0005488,GO:0005515,GO:0005575,GO:0005622,GO:0005623,GO:0005634,GO:0006139,GO:0006351,GO:0006355,GO:0006357,GO:0006725,GO:0006807,GO:0008150,GO:0008152,GO:0009058,GO:0009059,GO:0009889,GO:0009891,GO:0009893,GO:0009987,GO:0010467,GO:0010468,GO:0010556,GO:0010557,GO:0010604,GO:0010628,GO:…	-
spt_1002837	CK203_003270	GO:0006508,GO:0008234,GO:0009987	-
spt_1002838	LOC117906573	-	-
spt_1002839	FboxLRRrepeat MAX2 homolog A	GO:0000151,GO:0001101,GO:0005575,GO:0005622,GO:0005623,GO:0005634,GO:0006464,GO:0006807,GO:0006810,GO:0006950,GO:0007154,GO:0007165,GO:0007275,GO:0008150,GO:0008152,GO:0009314,GO:0009414,GO:0009415,GO:0009416,GO:0009628,GO:0009653,GO:0009719,GO:0009725,GO:0009733,GO:0009734,GO:0009755,GO:0009914,GO:0009926,GO:0009934,GO:0009987,GO:0010016,GO:0010029,GO:0010033,GO:0010035,GO:0010187,GO:0010817,GO:…	-
spt_1002899	LOW QUALITY PROTEIN: probable methyltransferase PMT20	GO:0000139,GO:0003674,GO:0003824,GO:0005575,GO:0005622,GO:0005623,GO:0005737,GO:0005768,GO:0005783,GO:0005789,GO:0005794,GO:0005802,GO:0008150,GO:0008152,GO:0008168,GO:0008757,GO:0009987,GO:0012505,GO:0016020,GO:0016021,GO:0016740,GO:0016741,GO:0016829,GO:0031090,GO:0031224,GO:0031410,GO:0031982,GO:0031984,GO:0032259,GO:0042175,GO:0043226,GO:0043227,GO:0043229,GO:0043231,GO:0044422,GO:0044424,GO:…	-
spt_1002900	LOC104881439 isoform X2	-	-
spt_1002903	At2g24330	GO:0005575,GO:0005622,GO:0005623,GO:0005737,GO:0005783,GO:0006996,GO:0007029,GO:0008150,GO:0009987,GO:0010256,GO:0012505,GO:0016020,GO:0016043,GO:0031984,GO:0043226,GO:0043227,GO:0043229,GO:0043231,GO:0044422,GO:0044424,GO:0044432,GO:0044444,GO:0044446,GO:0044464,GO:0071782,GO:0071786,GO:0071840,GO:0098827	-
spt_1002912	pentatricopeptide repeatcontaining protein At1g73400	GO:0003674,GO:0003676,GO:0003723,GO:0003727,GO:0003729,GO:0003735,GO:0003824,GO:0004518,GO:0004519,GO:0005488,GO:0005515,GO:0005575,GO:0005622,GO:0005623,GO:0005737,GO:0005739,GO:0005783,GO:0006139,GO:0006725,GO:0006807,GO:0008150,GO:0008152,GO:0009451,GO:0009507,GO:0009793,GO:0009987,GO:0010019,GO:0016020,GO:0016070,GO:0016554,GO:0016787,GO:0016788,GO:0022626,GO:0031930,GO:0034641,GO:0043170,GO:…	-
spt_1002913	LRR receptorlike serinethreonineprotein kinase FEI 2	-	-
spt_1002914	polymerase	GO:0000976,GO:0004842,GO:0005515,GO:0005516,GO:0005634,GO:0005737,GO:0005886,GO:0006139,GO:0006163,GO:0006725,GO:0006753,GO:0006793,GO:0006796,GO:0006807,GO:0008150,GO:0008152,GO:0009116,GO:0009117,GO:0009119,GO:0009150,GO:0009259,GO:0009987,GO:0015969,GO:0019637,GO:0019693,GO:0030139,GO:0033865,GO:0033875,GO:0034032,GO:0034035,GO:0034641,GO:0042278,GO:0044237,GO:0044238,GO:0044281,GO:0045944,GO:…	-
spt_1002915	probable polyamine transporter At1g31830 isoform X1	GO:0003333,GO:0003674,GO:0005215,GO:0005342,GO:0005575,GO:0005623,GO:0005886,GO:0005887,GO:0006810,GO:0006811,GO:0006812,GO:0006820,GO:0006865,GO:0006950,GO:0008150,GO:0008509,GO:0008514,GO:0009266,GO:0009408,GO:0009507,GO:0009628,GO:0015075,GO:0015171,GO:0015179,GO:0015203,GO:0015291,GO:0015293,GO:0015297,GO:0015318,GO:0015695,GO:0015696,GO:0015711,GO:0015807,GO:0015839,GO:0015846,GO:0015849,GO:…	-
spt_1002917	probable polyamine transporter At1g31830	GO:0003333,GO:0003674,GO:0005215,GO:0005342,GO:0005575,GO:0005623,GO:0005886,GO:0005887,GO:0006810,GO:0006811,GO:0006812,GO:0006820,GO:0006865,GO:0006950,GO:0008150,GO:0008509,GO:0008514,GO:0009266,GO:0009408,GO:0009507,GO:0009628,GO:0015075,GO:0015171,GO:0015179,GO:0015203,GO:0015291,GO:0015293,GO:0015297,GO:0015318,GO:0015695,GO:0015696,GO:0015711,GO:0015807,GO:0015839,GO:0015846,GO:0015849,GO:…	-
spt_1002918	unnamed	GO:0003727,GO:0003735,GO:0005515,GO:0005739,GO:0005783,GO:0009507,GO:0009793,GO:0016554,GO:0022626,GO:0080156	ko:K17964
spt_1002919	acylCoAbinding protein	GO:0000062,GO:0000166,GO:0001666,GO:0003674,GO:0005488,GO:0005543,GO:0005575,GO:0005622,GO:0005623,GO:0005737,GO:0005829,GO:0005886,GO:0006631,GO:0006810,GO:0006869,GO:0006950,GO:0008150,GO:0008289,GO:0009266,GO:0009314,GO:0009409,GO:0009416,GO:0009628,GO:0009642,GO:0009646,GO:0010876,GO:0016020,GO:0017076,GO:0030554,GO:0031210,GO:0032553,GO:0032555,GO:0032559,GO:0033036,GO:0033218,GO:0036094,GO:…	ko:K08762
spt_1002926	CK203_080918	GO:0003727,GO:0003735,GO:0005515,GO:0005739,GO:0005783,GO:0009507,GO:0009793,GO:0016554,GO:0022626,GO:0080156	-
spt_1002929	ureaproton symporter DUR3like isoform X1	GO:0003674,GO:0005215,GO:0005575,GO:0005623,GO:0005886,GO:0005887,GO:0006810,GO:0006811,GO:0006812,GO:0006950,GO:0006995,GO:0007154,GO:0008150,GO:0008324,GO:0008519,GO:0009267,GO:0009605,GO:0009987,GO:0009991,GO:0015075,GO:0015101,GO:0015203,GO:0015204,GO:0015291,GO:0015293,GO:0015489,GO:0015606,GO:0015695,GO:0015696,GO:0015840,GO:0015846,GO:0015847,GO:0015848,GO:0016020,GO:0016021,GO:0019755,GO:…	ko:K20989
spt_1002935	mediator of RNA polymerase II transcription subunit 34	GO:0000166,GO:0000373,GO:0000724,GO:0000725,GO:0003674,GO:0003676,GO:0003677,GO:0003678,GO:0003689,GO:0003729,GO:0003824,GO:0004003,GO:0004386,GO:0005488,GO:0005524,GO:0005575,GO:0005622,GO:0005623,GO:0005634,GO:0005654,GO:0005694,GO:0005730,GO:0005737,GO:0006139,GO:0006259,GO:0006260,GO:0006268,GO:0006281,GO:0006302,GO:0006310,GO:0006338,GO:0006351,GO:0006355,GO:0006725,GO:0006807,GO:0006950,GO:…	ko:K10899
spt_1002936	pentatricopeptide repeatcontaining protein At5g48910	GO:0003674,GO:0003676,GO:0003723,GO:0003727,GO:0003735,GO:0003824,GO:0004518,GO:0004519,GO:0005488,GO:0005515,GO:0005575,GO:0005622,GO:0005623,GO:0005737,GO:0005739,GO:0005783,GO:0006139,GO:0006725,GO:0006807,GO:0008150,GO:0008152,GO:0008270,GO:0009451,GO:0009507,GO:0009536,GO:0009793,GO:0009987,GO:0016020,GO:0016070,GO:0016554,GO:0016787,GO:0016788,GO:0022626,GO:0034641,GO:0043167,GO:0043169,GO:…	-
spt_1002937	Fboxkelchrepeat protein SKIP25	GO:0000151,GO:0005515,GO:0005575,GO:0005622,GO:0005623,GO:0005634,GO:0005829,GO:0006464,GO:0006807,GO:0008150,GO:0008152,GO:0009628,GO:0009987,GO:0016020,GO:0016567,GO:0019538,GO:0019762,GO:0031461,GO:0031463,GO:0032446,GO:0032991,GO:0036211,GO:0043170,GO:0043226,GO:0043227,GO:0043229,GO:0043231,GO:0043412,GO:0044237,GO:0044238,GO:0044260,GO:0044267,GO:0044424,GO:0044464,GO:0050896,GO:0070647,GO:…	-
spt_1002938	serinethreonineprotein phosphatase 6 regulatory ankyrin repeat subunit C	GO:0000003,GO:0000151,GO:0000278,GO:0000281,GO:0000323,GO:0000902,GO:0000904,GO:0000910,GO:0001508,GO:0001932,GO:0001933,GO:0002028,GO:0003008,GO:0003254,GO:0003674,GO:0003824,GO:0004842,GO:0005198,GO:0005200,GO:0005488,GO:0005515,GO:0005516,GO:0005575,GO:0005622,GO:0005623,GO:0005634,GO:0005737,GO:0005739,GO:0005764,GO:0005773,GO:0005783,GO:0005794,GO:0005829,GO:0005856,GO:0005886,GO:0005911,GO:…	-
spt_1003985	VITISV_008465	GO:0003676,GO:0003964,GO:0004519,GO:0006278,GO:0015074,GO:0016020	-
spt_1003986	HVA22like protein i isoform X1	GO:0000139,GO:0003674,GO:0005488,GO:0005515,GO:0005575,GO:0005622,GO:0005623,GO:0005634,GO:0005635,GO:0005737,GO:0005783,GO:0005789,GO:0005794,GO:0005933,GO:0005934,GO:0005938,GO:0006810,GO:0006950,GO:0006996,GO:0006997,GO:0006999,GO:0007029,GO:0007031,GO:0007049,GO:0008150,GO:0009987,GO:0010256,GO:0012505,GO:0016020,GO:0016021,GO:0016043,GO:0016192,GO:0022607,GO:0030176,GO:0030427,GO:0031090,GO:…	ko:K17279
spt_1004349	Vacuolarprocessing enzyme	GO:0000322,GO:0000323,GO:0000325,GO:0000326,GO:0001101,GO:0003674,GO:0003824,GO:0004175,GO:0004197,GO:0005575,GO:0005622,GO:0005623,GO:0005737,GO:0005773,GO:0006508,GO:0006624,GO:0006807,GO:0006950,GO:0007275,GO:0007568,GO:0008150,GO:0008152,GO:0008233,GO:0008234,GO:0009056,GO:0009057,GO:0009611,GO:0009719,GO:0009723,GO:0009725,GO:0009751,GO:0009753,GO:0009987,GO:0010033,GO:0010150,GO:0010467,GO:…	ko:K01369
spt_1004350	LOC117912524 isoform X3	GO:0003723,GO:0005634,GO:0005737,GO:0006408,GO:0015031	ko:K14291
spt_1004351	probable protein phosphatase 2C 72	GO:0003674,GO:0003824,GO:0004721,GO:0004722,GO:0005488,GO:0005886,GO:0006338,GO:0006357,GO:0006464,GO:0006470,GO:0006793,GO:0006796,GO:0006807,GO:0008150,GO:0008152,GO:0009819,GO:0009987,GO:0016020,GO:0016311,GO:0016787,GO:0016788,GO:0016791,GO:0019538,GO:0033549,GO:0036211,GO:0042578,GO:0043167,GO:0043169,GO:0043170,GO:0043412,GO:0044237,GO:0044238,GO:0044260,GO:0044267,GO:0046872,GO:0071704,GO:…	-
spt_1004352	LOC100260976	GO:0005737,GO:0006281,GO:0006325,GO:0045739,GO:0051301,GO:0070552	ko:K20776
spt_1004353	serine hydroxymethyltransferase 3, chloroplasticlike isoform X1	GO:0001505,GO:0003674,GO:0003824,GO:0004372,GO:0005488,GO:0005575,GO:0005622,GO:0005623,GO:0005737,GO:0005739,GO:0006082,GO:0006520,GO:0006544,GO:0006545,GO:0006563,GO:0006575,GO:0006725,GO:0006730,GO:0006732,GO:0006760,GO:0006807,GO:0008144,GO:0008150,GO:0008152,GO:0008168,GO:0008652,GO:0009058,GO:0009069,GO:0009070,GO:0009507,GO:0009532,GO:0009536,GO:0009570,GO:0009987,GO:0016053,GO:0016740,GO:…	ko:K00600
spt_1004355	60S ribosomal protein L281 isoform X1	GO:0003735,GO:0005829,GO:0005840,GO:0006412,GO:1990904	ko:K02903
spt_1004359	serinethreonine protein phosphatase 2A 55 kDa regulatory subunit B beta isoformlike isoform X1	GO:0000159,GO:0000278,GO:0003674,GO:0005515,GO:0005575,GO:0005622,GO:0005623,GO:0005634,GO:0005730,GO:0005737,GO:0005829,GO:0006464,GO:0006470,GO:0006793,GO:0006796,GO:0006807,GO:0007049,GO:0008150,GO:0008152,GO:0008287,GO:0009987,GO:0010492,GO:0010921,GO:0015078,GO:0015986,GO:0016311,GO:0019208,GO:0019220,GO:0019222,GO:0019538,GO:0019888,GO:0030234,GO:0031323,GO:0031399,GO:0031966,GO:0032268,GO:…	ko:K04354
spt_1004360	LOC104878980 isoform X1	-	-
spt_1004402	glycine dehydrogenase	GO:0000166,GO:0001505,GO:0003674,GO:0003824,GO:0004375,GO:0005488,GO:0005524,GO:0005575,GO:0005576,GO:0005622,GO:0005623,GO:0005737,GO:0005739,GO:0005960,GO:0006082,GO:0006520,GO:0006544,GO:0006546,GO:0006807,GO:0008144,GO:0008150,GO:0008152,GO:0009056,GO:0009063,GO:0009069,GO:0009071,GO:0009507,GO:0009526,GO:0009532,GO:0009534,GO:0009536,GO:0009570,GO:0009579,GO:0009941,GO:0009987,GO:0010035,GO:…	ko:K00281
spt_1004403	serinethreonineprotein kinase EDR1	GO:0000160,GO:0000166,GO:0001666,GO:0002215,GO:0003674,GO:0003824,GO:0004672,GO:0004674,GO:0004712,GO:0005488,GO:0005515,GO:0005524,GO:0005575,GO:0005622,GO:0005623,GO:0005634,GO:0005730,GO:0005737,GO:0005783,GO:0005789,GO:0005886,GO:0006082,GO:0006464,GO:0006468,GO:0006629,GO:0006720,GO:0006721,GO:0006793,GO:0006796,GO:0006807,GO:0006950,GO:0007154,GO:0007165,GO:0008144,GO:0008150,GO:0008152,GO:…	ko:K04424
spt_1004404	ycf36	GO:0016020	-
spt_1004405	protein REVERSIONTOETHYLENE SENSITIVITY1 isoform X2	GO:0000139,GO:0005575,GO:0005622,GO:0005623,GO:0005737,GO:0005783,GO:0005789,GO:0005794,GO:0008150,GO:0009719,GO:0009723,GO:0009725,GO:0009966,GO:0009968,GO:0010033,GO:0010104,GO:0010105,GO:0010646,GO:0010648,GO:0012505,GO:0016020,GO:0016021,GO:0023051,GO:0023057,GO:0031090,GO:0031224,GO:0031984,GO:0042175,GO:0042221,GO:0043226,GO:0043227,GO:0043229,GO:0043231,GO:0044422,GO:0044424,GO:0044425,GO:…	ko:K20726
spt_1004406	LOC100255893 isoform X1	GO:0016020	-
spt_1004768	pleiotropic drug resistance protein 1like isoform X1	GO:0000166,GO:0003674,GO:0003824,GO:0005488,GO:0005524,GO:0005575,GO:0005774,GO:0005886,GO:0006810,GO:0008144,GO:0009506,GO:0009507,GO:0009914,GO:0014035,GO:0016020,GO:0016021,GO:0016462,GO:0016787,GO:0016817,GO:0016818,GO:0016887,GO:0017076,GO:0017111,GO:0030554,GO:0031224,GO:0032553,GO:0032555,GO:0032559,GO:0035639,GO:0036094,GO:0043167,GO:0043168,GO:0044425,GO:0055085,GO:0071944,GO:0097159,GO:…	-
spt_1004770	unnamed	-	-
spt_1004772	probable indole3pyruvate monooxygenase YUCCA4	GO:0000003,GO:0000139,GO:0000166,GO:0003006,GO:0003674,GO:0003824,GO:0004497,GO:0004499,GO:0005488,GO:0005575,GO:0005622,GO:0005623,GO:0005634,GO:0005654,GO:0005737,GO:0005783,GO:0005789,GO:0005794,GO:0005829,GO:0007275,GO:0008150,GO:0008152,GO:0009058,GO:0009790,GO:0009791,GO:0009793,GO:0009850,GO:0009851,GO:0009909,GO:0009911,GO:0009987,GO:0010154,GO:0010229,GO:0010817,GO:0012505,GO:0016020,GO:…	ko:K11816
spt_1004954	probable WRKY transcription factor 32 isoform X1	GO:0003700,GO:0005515,GO:0005634,GO:0006355,GO:0043565	-
spt_1004955	exosome complex component RRP42	GO:0000175,GO:0000176,GO:0000177,GO:0000178,GO:0000288,GO:0000291,GO:0000459,GO:0000460,GO:0000466,GO:0000467,GO:0000469,GO:0000956,GO:0003674,GO:0003676,GO:0003723,GO:0003824,GO:0004518,GO:0004527,GO:0004532,GO:0004540,GO:0005488,GO:0005575,GO:0005622,GO:0005623,GO:0005634,GO:0005654,GO:0005730,GO:0005737,GO:0005829,GO:0006139,GO:0006364,GO:0006396,GO:0006399,GO:0006401,GO:0006402,GO:0006725,GO:…	ko:K12589
spt_1004956	3hydroxyisobutyrylCoA hydrolaselike protein 2	GO:0003674,GO:0003824,GO:0003860,GO:0005575,GO:0005622,GO:0005623,GO:0005737,GO:0005739,GO:0016289,GO:0016787,GO:0016788,GO:0016790,GO:0043226,GO:0043227,GO:0043229,GO:0043231,GO:0044424,GO:0044444,GO:0044464	ko:K05605
spt_1004957	phospholipase D Zlike	GO:0003674,GO:0003824,GO:0004620,GO:0004630,GO:0006508,GO:0006629,GO:0008081,GO:0008150,GO:0008152,GO:0009056,GO:0009987,GO:0016020,GO:0016042,GO:0016298,GO:0016787,GO:0016788,GO:0042578,GO:0044238,GO:0070290,GO:0071704,GO:1901575	ko:K16860
spt_1004966	probable protein phosphatase 2C 60	GO:0001101,GO:0003674,GO:0003824,GO:0004721,GO:0004722,GO:0005488,GO:0005575,GO:0005623,GO:0005886,GO:0006338,GO:0006357,GO:0006464,GO:0006470,GO:0006793,GO:0006796,GO:0006807,GO:0007165,GO:0008150,GO:0008152,GO:0009719,GO:0009725,GO:0009737,GO:0009819,GO:0009987,GO:0010033,GO:0016020,GO:0016311,GO:0016787,GO:0016788,GO:0016791,GO:0017018,GO:0019538,GO:0033192,GO:0033993,GO:0036211,GO:0042221,GO:…	ko:K14803,ko:K17499
spt_1004967	VITISV_008666	GO:0006308,GO:0008855,GO:0009318	-
spt_1004969	pentatricopeptide repeatcontaining protein At3g29230like	GO:0003723,GO:0003727,GO:0003735,GO:0004519,GO:0005515,GO:0005739,GO:0005783,GO:0009451,GO:0009507,GO:0009793,GO:0009987,GO:0016554,GO:0022626,GO:0080156	-
spt_1004970	eukaryotic translation initiation factor	GO:0000502,GO:0003674,GO:0003676,GO:0003723,GO:0003729,GO:0003743,GO:0005488,GO:0005515,GO:0006412,GO:0006413,GO:0006417,GO:0006518,GO:0006807,GO:0006810,GO:0008135,GO:0008150,GO:0008152,GO:0009058,GO:0009059,GO:0009605,GO:0009607,GO:0009615,GO:0009889,GO:0009987,GO:0010467,GO:0010468,GO:0010556,GO:0010608,GO:0016020,GO:0016032,GO:0016281,GO:0019222,GO:0019538,GO:0031323,GO:0031326,GO:0032268,GO:…	ko:K03260
spt_1005139	isocitrate dehydrogenase	GO:0000287,GO:0004450,GO:0005507,GO:0005515,GO:0005634,GO:0005739,GO:0005829,GO:0005886,GO:0006099,GO:0006102,GO:0006739,GO:0009506,GO:0009570,GO:0010043,GO:0042742,GO:0048046,GO:0051287	ko:K00031
spt_1005244	protein ILITYHIA isoform X2	GO:0001932,GO:0002376,GO:0003674,GO:0003700,GO:0003746,GO:0004674,GO:0005488,GO:0005515,GO:0005575,GO:0005622,GO:0005623,GO:0005634,GO:0005737,GO:0005794,GO:0005829,GO:0005856,GO:0006355,GO:0006414,GO:0006417,GO:0006886,GO:0006950,GO:0006952,GO:0006955,GO:0008150,GO:0009506,GO:0009605,GO:0009607,GO:0009617,GO:0009627,GO:0009682,GO:0009889,GO:0009893,GO:0009987,GO:0010468,GO:0010556,GO:0010562,GO:…	-
spt_1005246	Retrovirusrelated Pol polyprotein	GO:0003676,GO:0004190,GO:0009987,GO:0015074	-
spt_1005247	Retrovirusrelated Pol polyprotein	GO:0003676,GO:0016020,GO:0016772,GO:0071897,GO:0140097	-
spt_1005248	Retrovirusrelated Pol polyprotein	GO:0003676,GO:0005575,GO:0005622,GO:0005623,GO:0005737,GO:0005739,GO:0043226,GO:0043227,GO:0043229,GO:0043231,GO:0044424,GO:0044444,GO:0044464	-
spt_1005253	GDSL esteraselipase At5g33370	GO:0003674,GO:0003677,GO:0003700,GO:0003824,GO:0005575,GO:0005576,GO:0005634,GO:0006355,GO:0006629,GO:0007275,GO:0008126,GO:0008150,GO:0008152,GO:0009056,GO:0009751,GO:0010226,GO:0016020,GO:0016042,GO:0016787,GO:0016788,GO:0032501,GO:0032502,GO:0042335,GO:0042538,GO:0044238,GO:0048856,GO:0071704,GO:0102067,GO:1901575	-
spt_1005254	LOC117913259	GO:0000155,GO:0000156,GO:0000160,GO:0003674,GO:0003824,GO:0004721,GO:0005575,GO:0005622,GO:0005623,GO:0005634,GO:0005737,GO:0006139,GO:0006351,GO:0006355,GO:0006464,GO:0006470,GO:0006725,GO:0006793,GO:0006796,GO:0006807,GO:0007154,GO:0007165,GO:0008150,GO:0008152,GO:0009058,GO:0009059,GO:0009719,GO:0009725,GO:0009735,GO:0009736,GO:0009755,GO:0009889,GO:0009987,GO:0010033,GO:0010467,GO:0010468,GO:…	-
spt_1005255	LOC100241547	GO:0003674,GO:0003676,GO:0003723,GO:0003727,GO:0003735,GO:0003824,GO:0004518,GO:0004519,GO:0004601,GO:0005488,GO:0005515,GO:0005575,GO:0005622,GO:0005623,GO:0005739,GO:0005783,GO:0006139,GO:0006725,GO:0006807,GO:0006979,GO:0008150,GO:0008152,GO:0009451,GO:0009507,GO:0009793,GO:0009987,GO:0016070,GO:0016554,GO:0016787,GO:0016788,GO:0020037,GO:0022626,GO:0034641,GO:0043170,GO:0043226,GO:0043227,GO:…	-
spt_1005256	Transposon TX1 uncharacterized 149 kDa protein	GO:0000123,GO:0002576,GO:0003674,GO:0005488,GO:0005575,GO:0005576,GO:0005622,GO:0005623,GO:0005634,GO:0005654,GO:0005737,GO:0005829,GO:0006325,GO:0006464,GO:0006473,GO:0006475,GO:0006807,GO:0006810,GO:0006887,GO:0006996,GO:0008150,GO:0008152,GO:0009987,GO:0016043,GO:0016192,GO:0016569,GO:0016570,GO:0016573,GO:0018193,GO:0018205,GO:0018393,GO:0018394,GO:0019538,GO:0031248,GO:0031974,GO:0031981,GO:…	ko:K22184
spt_1005271	LOC117913574	GO:0005515,GO:0009507,GO:0009987,GO:0016279,GO:0032259,GO:0051571	-
spt_1005272	twocomponent response regulator ARR22	GO:0000156,GO:0000160,GO:0003674,GO:0003824,GO:0004721,GO:0005575,GO:0005622,GO:0005623,GO:0005634,GO:0005737,GO:0006139,GO:0006351,GO:0006355,GO:0006464,GO:0006470,GO:0006725,GO:0006793,GO:0006796,GO:0006807,GO:0007154,GO:0007165,GO:0008150,GO:0008152,GO:0009058,GO:0009059,GO:0009719,GO:0009725,GO:0009735,GO:0009736,GO:0009755,GO:0009889,GO:0009987,GO:0010033,GO:0010467,GO:0010468,GO:0010556,GO:…	-
spt_1005273	VITISV_025523	GO:0003676,GO:0004190,GO:0009987,GO:0015074,GO:0016020	-
spt_1005274	VITISV_013119	GO:0003676,GO:0009987,GO:0015074	-
spt_1005275	syntaxin112	GO:0000149,GO:0003674,GO:0004140,GO:0004595,GO:0005484,GO:0005488,GO:0005515,GO:0005575,GO:0005622,GO:0005623,GO:0005634,GO:0005737,GO:0005886,GO:0006810,GO:0006886,GO:0006887,GO:0006906,GO:0006950,GO:0006996,GO:0008104,GO:0008150,GO:0009266,GO:0009409,GO:0009628,GO:0009987,GO:0012505,GO:0015031,GO:0015833,GO:0015937,GO:0016020,GO:0016021,GO:0016043,GO:0016050,GO:0016192,GO:0022406,GO:0031201,GO:…	ko:K02201,ko:K08486
spt_1005324	-	GO:0003674,GO:0003824,GO:0005575,GO:0005622,GO:0005623,GO:0005737,GO:0005975,GO:0006629,GO:0006694,GO:0008150,GO:0008152,GO:0008194,GO:0008202,GO:0008610,GO:0009058,GO:0009987,GO:0016020,GO:0016125,GO:0016126,GO:0016740,GO:0016757,GO:0016758,GO:0016906,GO:0030258,GO:0030259,GO:0035251,GO:0043226,GO:0043227,GO:0043229,GO:0043231,GO:0044237,GO:0044238,GO:0044255,GO:0044424,GO:0044464,GO:0046527,GO:…	ko:K05841
spt_1005325	-	GO:0016020	ko:K08081,ko:K21596
spt_1006728	AThook motif nuclearlocalized protein 20	GO:0003680,GO:0003700,GO:0005634,GO:0006355,GO:0015031,GO:0016020	-
spt_1006729	protein PSK SIMULATOR 3	GO:0045927	-
spt_1006734	actinrelated protein 9 isoform X1	GO:0000228,GO:0000785,GO:0000790,GO:0005575,GO:0005622,GO:0005623,GO:0005634,GO:0005694,GO:0006302,GO:0006325,GO:0006338,GO:0006355,GO:0006996,GO:0008150,GO:0009987,GO:0016020,GO:0016043,GO:0031011,GO:0031974,GO:0031981,GO:0032991,GO:0033202,GO:0043226,GO:0043227,GO:0043228,GO:0043229,GO:0043231,GO:0043232,GO:0043233,GO:0044422,GO:0044424,GO:0044427,GO:0044428,GO:0044446,GO:0044454,GO:0044464,GO:…	ko:K11673
spt_1006735	LOC100256194	GO:0016020	-
spt_1006736	LOC100245894	GO:0016020,GO:0016874	-
spt_1006737	1aminocyclopropane1carboxylate oxidase homolog 1like	GO:0000003,GO:0003006,GO:0003674,GO:0003824,GO:0005488,GO:0007275,GO:0007568,GO:0008150,GO:0008152,GO:0009058,GO:0009692,GO:0009693,GO:0009835,GO:0009987,GO:0010154,GO:0010817,GO:0016491,GO:0016706,GO:0019842,GO:0021700,GO:0022414,GO:0030246,GO:0031406,GO:0031418,GO:0032501,GO:0032502,GO:0036094,GO:0042445,GO:0042446,GO:0043167,GO:0043168,GO:0043169,GO:0043177,GO:0043449,GO:0043450,GO:0044237,GO:…	-
spt_1006795	casein kinase 1like protein 10 isoform X1	GO:0000166,GO:0002215,GO:0003674,GO:0003824,GO:0004672,GO:0004674,GO:0005488,GO:0005515,GO:0005524,GO:0005575,GO:0005622,GO:0005623,GO:0005634,GO:0005730,GO:0005737,GO:0005886,GO:0005911,GO:0006338,GO:0006464,GO:0006468,GO:0006793,GO:0006796,GO:0006807,GO:0006810,GO:0006897,GO:0007165,GO:0008144,GO:0008150,GO:0008152,GO:0008360,GO:0009506,GO:0009987,GO:0016020,GO:0016192,GO:0016301,GO:0016310,GO:…	ko:K08959,ko:K08960
spt_1007001	probable DNA primase	GO:0000228,GO:0000428,GO:0003674,GO:0003676,GO:0003677,GO:0003697,GO:0003824,GO:0003887,GO:0003896,GO:0003899,GO:0005488,GO:0005575,GO:0005622,GO:0005623,GO:0005634,GO:0005657,GO:0005658,GO:0005694,GO:0006139,GO:0006259,GO:0006260,GO:0006261,GO:0006269,GO:0006270,GO:0006725,GO:0006807,GO:0008150,GO:0008152,GO:0009058,GO:0009059,GO:0009987,GO:0016020,GO:0016070,GO:0016740,GO:0016772,GO:0016779,GO:…	ko:K02685
spt_1007002	-	GO:0003676	ko:K05933
spt_1007003	bet1like SNARE 11	GO:0000139,GO:0005575,GO:0005622,GO:0005623,GO:0005634,GO:0005737,GO:0005783,GO:0005789,GO:0005794,GO:0005886,GO:0006810,GO:0008104,GO:0008150,GO:0012505,GO:0015031,GO:0015833,GO:0016020,GO:0016021,GO:0016192,GO:0031090,GO:0031224,GO:0031984,GO:0033036,GO:0042175,GO:0042886,GO:0043226,GO:0043227,GO:0043229,GO:0043231,GO:0044422,GO:0044424,GO:0044425,GO:0044431,GO:0044432,GO:0044444,GO:0044446,GO:…	ko:K08504
spt_1007181	VITISV_001367	-	-
spt_1007354	aspartic proteinaselike protein 2 isoform X1	GO:0003674,GO:0003824,GO:0004175,GO:0004190,GO:0005575,GO:0005623,GO:0005886,GO:0006508,GO:0006807,GO:0008150,GO:0008152,GO:0008233,GO:0009056,GO:0009057,GO:0009987,GO:0016020,GO:0016787,GO:0019538,GO:0030163,GO:0031224,GO:0031225,GO:0031226,GO:0043170,GO:0044238,GO:0044425,GO:0044459,GO:0044464,GO:0046658,GO:0070001,GO:0070011,GO:0071704,GO:0071944,GO:0140096,GO:1901564,GO:1901565,GO:1901575	-
spt_1007355	LOC104879403	GO:0003002,GO:0003674,GO:0005102,GO:0005488,GO:0005515,GO:0005575,GO:0005576,GO:0007154,GO:0007267,GO:0007275,GO:0007389,GO:0008150,GO:0009653,GO:0009791,GO:0009888,GO:0009987,GO:0010016,GO:0010052,GO:0010103,GO:0010374,GO:0010375,GO:0019899,GO:0019900,GO:0019901,GO:0023052,GO:0030154,GO:0032501,GO:0032502,GO:0033612,GO:0048046,GO:0048367,GO:0048518,GO:0048580,GO:0048582,GO:0048731,GO:0048856,GO:…	-
spt_1007356	Fboxkelchrepeat protein	GO:0005515,GO:0005777,GO:0006355,GO:0006511,GO:0008284,GO:0019005	-
spt_1007357	Fboxkelchrepeat protein At3g06240like	GO:0005515,GO:0005777,GO:0006355,GO:0006511,GO:0008284,GO:0019005	-
spt_1007359	VITISV_003239	GO:0005515	-
spt_1007709	LOC100247425	GO:0000127,GO:0001002,GO:0001003,GO:0005634,GO:0006384	ko:K15202
spt_1007710	LOC100242287	-	-
spt_1007711	outer envelope pore protein 37, chloroplastic	GO:0003674,GO:0005215,GO:0005216,GO:0005488,GO:0005515,GO:0005575,GO:0005622,GO:0005623,GO:0005737,GO:0005739,GO:0006810,GO:0006811,GO:0006812,GO:0008150,GO:0009507,GO:0009526,GO:0009527,GO:0009528,GO:0009536,GO:0009706,GO:0009707,GO:0009941,GO:0015075,GO:0015267,GO:0015288,GO:0015318,GO:0016020,GO:0016021,GO:0019866,GO:0019867,GO:0022803,GO:0022829,GO:0022838,GO:0022857,GO:0031090,GO:0031224,GO:…	-
spt_1007712	larelated protein 6B	GO:0003674,GO:0003676,GO:0003723,GO:0003729,GO:0005488,GO:0005575,GO:0005622,GO:0005623,GO:0005634,GO:0005654,GO:0005730,GO:0005829,GO:0006139,GO:0006351,GO:0006355,GO:0006396,GO:0006725,GO:0006807,GO:0008150,GO:0008152,GO:0008757,GO:0009058,GO:0009059,GO:0009735,GO:0009889,GO:0009987,GO:0010445,GO:0010467,GO:0010468,GO:0010556,GO:0016020,GO:0016070,GO:0018130,GO:0019219,GO:0019222,GO:0019438,GO:…	ko:K15191
spt_1007716	LOC104879499	-	-
spt_1007717	LOC117915444	GO:0005840,GO:0016020	-
spt_1007718	unnamed	GO:0005634,GO:0006606,GO:0046872	-
spt_1007720	poly(ADPribose) glycohydrolase 1 isoform X1	GO:0001101,GO:0003674,GO:0003824,GO:0004553,GO:0004649,GO:0005634,GO:0005737,GO:0005975,GO:0006282,GO:0006950,GO:0006952,GO:0006970,GO:0006974,GO:0006979,GO:0008150,GO:0008152,GO:0009225,GO:0009414,GO:0009415,GO:0009605,GO:0009607,GO:0009620,GO:0009628,GO:0009987,GO:0010035,GO:0010118,GO:0016787,GO:0016798,GO:0019219,GO:0019222,GO:0031323,GO:0033554,GO:0042221,GO:0043207,GO:0044238,GO:0048511,GO:…	ko:K07759
spt_1007723	6,7dimethyl8ribityllumazine synthase, chloroplastic	GO:0000906,GO:0003674,GO:0003824,GO:0005575,GO:0005622,GO:0005623,GO:0005737,GO:0006766,GO:0006767,GO:0006771,GO:0006807,GO:0008150,GO:0008152,GO:0009058,GO:0009110,GO:0009231,GO:0009349,GO:0009507,GO:0009532,GO:0009536,GO:0009570,GO:0009987,GO:0016740,GO:0016765,GO:0017144,GO:0018130,GO:0032991,GO:0034641,GO:0042364,GO:0042726,GO:0042727,GO:0042802,GO:0043226,GO:0043227,GO:0043229,GO:0043231,GO:…	ko:K00794
spt_1007727	-	GO:0005575,GO:0005622,GO:0005623,GO:0005634,GO:0005737,GO:0005783,GO:0007275,GO:0008150,GO:0008284,GO:0009719,GO:0009723,GO:0009725,GO:0009733,GO:0009741,GO:0009825,GO:0009987,GO:0010033,GO:0012505,GO:0014070,GO:0016020,GO:0016021,GO:0016049,GO:0031224,GO:0032501,GO:0032502,GO:0032870,GO:0033993,GO:0035265,GO:0040007,GO:0040008,GO:0042127,GO:0042221,GO:0043226,GO:0043227,GO:0043229,GO:0043231,GO:…	-
spt_1007728	ankyrin repeat protein SKIP35	GO:0000003,GO:0000139,GO:0000271,GO:0003006,GO:0003674,GO:0003824,GO:0005488,GO:0005575,GO:0005622,GO:0005623,GO:0005737,GO:0005783,GO:0005789,GO:0005794,GO:0005795,GO:0005975,GO:0005976,GO:0006029,GO:0006464,GO:0006486,GO:0006493,GO:0006807,GO:0007049,GO:0007275,GO:0008150,GO:0008152,GO:0008194,GO:0008378,GO:0009058,GO:0009059,GO:0009100,GO:0009101,GO:0009653,GO:0009791,GO:0009888,GO:0009987,GO:…	ko:K00734
spt_1007730	beta1,3galactosyltransferase sqv2	GO:0000003,GO:0000139,GO:0000271,GO:0003006,GO:0003674,GO:0003824,GO:0005488,GO:0005575,GO:0005622,GO:0005623,GO:0005737,GO:0005783,GO:0005789,GO:0005794,GO:0005795,GO:0005975,GO:0005976,GO:0006029,GO:0006464,GO:0006486,GO:0006493,GO:0006807,GO:0007049,GO:0007275,GO:0008150,GO:0008152,GO:0008194,GO:0008378,GO:0009058,GO:0009059,GO:0009100,GO:0009101,GO:0009653,GO:0009791,GO:0009888,GO:0009987,GO:…	ko:K00734
spt_1007731	guanosine nucleotide diphosphate dissociation inhibitor 2	GO:0001558,GO:0003674,GO:0005092,GO:0005093,GO:0005096,GO:0005488,GO:0005515,GO:0005575,GO:0005576,GO:0005622,GO:0005623,GO:0005737,GO:0005794,GO:0005829,GO:0005911,GO:0006810,GO:0007154,GO:0007165,GO:0007264,GO:0007265,GO:0007275,GO:0007399,GO:0008047,GO:0008104,GO:0008150,GO:0008361,GO:0009506,GO:0009987,GO:0010035,GO:0010038,GO:0010720,GO:0010721,GO:0010769,GO:0010770,GO:0010771,GO:0010975,GO:…	ko:K17255
spt_1007760	pentatricopeptide repeatcontaining protein At5g56310	GO:0000959,GO:0003674,GO:0003676,GO:0003723,GO:0003727,GO:0003735,GO:0003824,GO:0004518,GO:0004519,GO:0005488,GO:0005515,GO:0005575,GO:0005622,GO:0005623,GO:0005737,GO:0005739,GO:0005783,GO:0006139,GO:0006725,GO:0006807,GO:0008150,GO:0008152,GO:0009451,GO:0009507,GO:0009793,GO:0009987,GO:0016020,GO:0016070,GO:0016071,GO:0016554,GO:0016556,GO:0016787,GO:0016788,GO:0022626,GO:0034641,GO:0043170,GO:…	-
spt_1007761	kinesinlike protein KIN14T isoform X2	GO:0000166,GO:0003674,GO:0003774,GO:0003777,GO:0003824,GO:0005488,GO:0005515,GO:0005524,GO:0005575,GO:0005622,GO:0005623,GO:0005737,GO:0005739,GO:0005856,GO:0005871,GO:0005874,GO:0005875,GO:0006928,GO:0007017,GO:0007018,GO:0008017,GO:0008092,GO:0008144,GO:0008150,GO:0009987,GO:0015630,GO:0015631,GO:0016020,GO:0016462,GO:0016787,GO:0016817,GO:0016818,GO:0016853,GO:0016887,GO:0017076,GO:0017111,GO:…	ko:K10405,ko:K10406
spt_1007762	unnamed	GO:0016020,GO:0016779,GO:0098827	-
spt_1007763	LOC117916639	GO:0004386,GO:0016787	-
spt_1008033	Grip22like protein	GO:0005575,GO:0005576,GO:0016020	-
spt_1008034	BEL1like homeodomain protein 9	GO:0000003,GO:0000981,GO:0001067,GO:0001763,GO:0003006,GO:0003674,GO:0003676,GO:0003677,GO:0003700,GO:0005488,GO:0005575,GO:0005622,GO:0005623,GO:0005634,GO:0006139,GO:0006351,GO:0006355,GO:0006725,GO:0006807,GO:0007275,GO:0007389,GO:0008150,GO:0008152,GO:0009058,GO:0009059,GO:0009653,GO:0009791,GO:0009888,GO:0009889,GO:0009987,GO:0010016,GO:0010073,GO:0010074,GO:0010076,GO:0010077,GO:0010223,GO:…	-
spt_1008036	LOC104879578	-	-
spt_1008037	LOC117917126	-	-
spt_1008040	helicase protein MOM1 isoform X1	GO:0000166,GO:0000785,GO:0003674,GO:0003677,GO:0003682,GO:0003824,GO:0004386,GO:0005488,GO:0005515,GO:0005524,GO:0005575,GO:0005622,GO:0005623,GO:0005634,GO:0006139,GO:0006325,GO:0006342,GO:0006344,GO:0006351,GO:0006355,GO:0006725,GO:0006807,GO:0006996,GO:0008144,GO:0008150,GO:0008152,GO:0009058,GO:0009059,GO:0009506,GO:0009507,GO:0009889,GO:0009890,GO:0009892,GO:0009987,GO:0010467,GO:0010468,GO:…	ko:K11642,ko:K11643,ko:K20091
spt_1008444	LOC100248366	GO:0016020	-
spt_1008445	CK203_095709	-	-
spt_1008446	phosphatidylinositol Nacetylglucosaminyltransferase subunit A isoform X2	GO:0000003,GO:0000506,GO:0000902,GO:0000904,GO:0003006,GO:0003674,GO:0003824,GO:0005575,GO:0005622,GO:0005623,GO:0005737,GO:0005783,GO:0005789,GO:0006464,GO:0006497,GO:0006505,GO:0006506,GO:0006629,GO:0006643,GO:0006644,GO:0006650,GO:0006661,GO:0006664,GO:0006793,GO:0006796,GO:0006807,GO:0008150,GO:0008152,GO:0008194,GO:0008375,GO:0008610,GO:0008654,GO:0009058,GO:0009059,GO:0009247,GO:0009653,GO:…	ko:K03857
spt_1008447	GDPmannose transporter GONST2	GO:0000139,GO:0005458,GO:0005794,GO:0008168,GO:0015297,GO:0032259,GO:1990570	ko:K15356
spt_1008448	transcription factor MYB64like	GO:0000003,GO:0000978,GO:0000981,GO:0000988,GO:0000989,GO:0001067,GO:0001076,GO:0001134,GO:0001135,GO:0003006,GO:0003674,GO:0003676,GO:0003677,GO:0003700,GO:0005488,GO:0005575,GO:0005622,GO:0005623,GO:0005634,GO:0006139,GO:0006351,GO:0006355,GO:0006357,GO:0006725,GO:0006807,GO:0006935,GO:0007275,GO:0008150,GO:0008152,GO:0009058,GO:0009059,GO:0009553,GO:0009605,GO:0009736,GO:0009856,GO:0009889,GO:…	ko:K09422
spt_1008479	ABC transporter G family member 31 isoform X2	GO:0000166,GO:0003674,GO:0003824,GO:0005215,GO:0005488,GO:0005524,GO:0005575,GO:0005623,GO:0005694,GO:0005774,GO:0005886,GO:0005911,GO:0006810,GO:0006855,GO:0008144,GO:0008150,GO:0009506,GO:0009507,GO:0009536,GO:0014035,GO:0015399,GO:0015405,GO:0015893,GO:0016020,GO:0016021,GO:0016462,GO:0016787,GO:0016817,GO:0016818,GO:0016887,GO:0017076,GO:0017111,GO:0022804,GO:0022857,GO:0030054,GO:0030554,GO:…	-
spt_1008480	3oxoDelta(4,5)steroid 5betareductase	GO:0016627	ko:K22419
spt_1008481	vacuolar cationproton exchanger 3like	GO:0000325,GO:0003674,GO:0005215,GO:0005575,GO:0005622,GO:0005623,GO:0005737,GO:0005773,GO:0005774,GO:0006793,GO:0006810,GO:0006811,GO:0006812,GO:0006816,GO:0006873,GO:0006874,GO:0006875,GO:0006882,GO:0008150,GO:0008152,GO:0008324,GO:0009605,GO:0009607,GO:0009624,GO:0009705,GO:0009987,GO:0010035,GO:0010038,GO:0015075,GO:0015077,GO:0015078,GO:0015085,GO:0015291,GO:0015297,GO:0015298,GO:0015299,GO:…	ko:K07300
spt_1008483	SMR domaincontaining protein At5g58720 isoform X1	GO:0016020	-
spt_1009084	ABC transporter G family member 15.4	GO:0005524,GO:0005774,GO:0005886,GO:0006810,GO:0009506,GO:0009507,GO:0014035,GO:0016020,GO:0016887,GO:0055085,GO:0140359	-
spt_1009085	ABC transporter G family member 15like isoform X1	GO:0000166,GO:0003002,GO:0003674,GO:0003824,GO:0005215,GO:0005488,GO:0005524,GO:0005575,GO:0005623,GO:0005774,GO:0005886,GO:0005911,GO:0006810,GO:0006950,GO:0006970,GO:0007275,GO:0007389,GO:0008144,GO:0008150,GO:0009506,GO:0009507,GO:0009628,GO:0009651,GO:0014035,GO:0015399,GO:0015405,GO:0016020,GO:0016021,GO:0016462,GO:0016787,GO:0016817,GO:0016818,GO:0016887,GO:0017076,GO:0017111,GO:0022804,GO:…	-
spt_1009086	ABC transporter G family member 15 isoform X1	GO:0000166,GO:0003002,GO:0003674,GO:0003824,GO:0005215,GO:0005488,GO:0005524,GO:0005575,GO:0005623,GO:0005774,GO:0005886,GO:0005911,GO:0006810,GO:0006950,GO:0006970,GO:0007275,GO:0007389,GO:0008144,GO:0008150,GO:0009506,GO:0009628,GO:0009651,GO:0014035,GO:0015399,GO:0015405,GO:0016020,GO:0016021,GO:0016462,GO:0016787,GO:0016817,GO:0016818,GO:0016887,GO:0017076,GO:0017111,GO:0022804,GO:0022857,GO:…	-
spt_1009087	ABC transporter G family member 15	GO:0005524,GO:0005774,GO:0005886,GO:0006810,GO:0009506,GO:0009651,GO:0014035,GO:0016020,GO:0016887,GO:0055085,GO:0080051,GO:0080172,GO:0140359	-
spt_1009242	peptidylprolyl cistrans isomerase CYP71	GO:0000003,GO:0000413,GO:0003002,GO:0003006,GO:0003674,GO:0003682,GO:0003755,GO:0003824,GO:0005488,GO:0005515,GO:0005575,GO:0005622,GO:0005623,GO:0005634,GO:0005654,GO:0005681,GO:0005730,GO:0006139,GO:0006357,GO:0006396,GO:0006397,GO:0006457,GO:0006464,GO:0006725,GO:0006807,GO:0007275,GO:0007389,GO:0008144,GO:0008150,GO:0008152,GO:0008380,GO:0009653,GO:0009791,GO:0009888,GO:0009908,GO:0009909,GO:…	ko:K12736
spt_1009243	unnamed	GO:0002182,GO:0003674,GO:0003735,GO:0005198,GO:0005488,GO:0005575,GO:0005622,GO:0005623,GO:0005737,GO:0005829,GO:0005840,GO:0006412,GO:0006414,GO:0006518,GO:0006807,GO:0008150,GO:0008152,GO:0009058,GO:0009059,GO:0009987,GO:0010467,GO:0015934,GO:0016020,GO:0019538,GO:0022625,GO:0022626,GO:0032991,GO:0034641,GO:0034645,GO:0043043,GO:0043170,GO:0043226,GO:0043228,GO:0043229,GO:0043232,GO:0043603,GO:…	ko:K02943
spt_1009244	DNA polymerase epsilon catalytic subunit Alike	GO:0000082,GO:0000166,GO:0000228,GO:0000278,GO:0000731,GO:0003674,GO:0003676,GO:0003677,GO:0003682,GO:0003755,GO:0003824,GO:0003887,GO:0004518,GO:0004527,GO:0004529,GO:0004536,GO:0005488,GO:0005575,GO:0005576,GO:0005622,GO:0005623,GO:0005634,GO:0005654,GO:0005694,GO:0005886,GO:0006139,GO:0006259,GO:0006260,GO:0006261,GO:0006271,GO:0006272,GO:0006281,GO:0006284,GO:0006287,GO:0006289,GO:0006297,GO:…	ko:K02324
spt_1009245	LINE1 retrotransposable element ORF2 protein	GO:0016020	ko:K21249
spt_1009406	flowering locus K homology domainlike isoform X1	GO:0003676,GO:0003723,GO:0003729,GO:0003735,GO:0005634,GO:0005737,GO:0009911,GO:0016020,GO:0016607,GO:0031469	ko:K21444
spt_1009407	pentatricopeptide repeatcontaining protein At1g63330	GO:0000959,GO:0000963,GO:0000966,GO:0003674,GO:0003676,GO:0003723,GO:0003727,GO:0003729,GO:0003735,GO:0003824,GO:0004016,GO:0004518,GO:0004519,GO:0005488,GO:0005515,GO:0005575,GO:0005622,GO:0005623,GO:0005737,GO:0005739,GO:0005783,GO:0006139,GO:0006396,GO:0006397,GO:0006725,GO:0006807,GO:0007005,GO:0007275,GO:0008150,GO:0008152,GO:0009451,GO:0009507,GO:0009536,GO:0009791,GO:0009793,GO:0009845,GO:…	ko:K17964
spt_1009408	LOC117917753	GO:0004601,GO:0005524,GO:0005774,GO:0005886,GO:0006979,GO:0009536,GO:0015267,GO:0016020,GO:0016301,GO:0016787,GO:0020037,GO:0055085,GO:0070208,GO:0098869	-
spt_1009409	Copia protein	GO:0003674,GO:0003676,GO:0003700,GO:0003824,GO:0003964,GO:0004175,GO:0004190,GO:0004518,GO:0004519,GO:0004565,GO:0005488,GO:0005975,GO:0006139,GO:0006259,GO:0006278,GO:0006355,GO:0006508,GO:0006725,GO:0006807,GO:0008150,GO:0008152,GO:0008233,GO:0008270,GO:0009058,GO:0009059,GO:0009987,GO:0015074,GO:0016602,GO:0016740,GO:0016772,GO:0016779,GO:0016787,GO:0016788,GO:0018130,GO:0019438,GO:0019538,GO:…	ko:K08874
spt_1009820	LOC100243435 isoform X1	GO:0016746	-
spt_1009821	L10interacting MYB domaincontaining protein	-	-
spt_1009822	protein DEHYDRATIONINDUCED 19 homolog 4	GO:0001101,GO:0003674,GO:0003676,GO:0003677,GO:0005488,GO:0005575,GO:0005622,GO:0005623,GO:0005634,GO:0006355,GO:0006950,GO:0006970,GO:0008150,GO:0009414,GO:0009415,GO:0009628,GO:0009651,GO:0009719,GO:0009725,GO:0009737,GO:0009889,GO:0009891,GO:0009893,GO:0010033,GO:0010035,GO:0010468,GO:0010556,GO:0010557,GO:0010604,GO:0010628,GO:0019219,GO:0019222,GO:0031323,GO:0031325,GO:0031326,GO:0031328,GO:…	ko:K22376
spt_1009823	syntaxin41like	GO:0000139,GO:0000149,GO:0005484,GO:0005802,GO:0006886,GO:0006896,GO:0006906,GO:0007030,GO:0009306,GO:0009658,GO:0009863,GO:0016020,GO:0031201,GO:0043001,GO:0048278,GO:0050832,GO:0098629,GO:1900150	ko:K08489
spt_1009824	Twocomponent response regulator ARR2	GO:0000003,GO:0000156,GO:0000160,GO:0003006,GO:0003674,GO:0003676,GO:0003677,GO:0003700,GO:0005488,GO:0005575,GO:0005622,GO:0005623,GO:0005634,GO:0006139,GO:0006351,GO:0006355,GO:0006725,GO:0006807,GO:0007154,GO:0007165,GO:0007275,GO:0008150,GO:0008152,GO:0009058,GO:0009059,GO:0009719,GO:0009725,GO:0009735,GO:0009736,GO:0009755,GO:0009790,GO:0009791,GO:0009793,GO:0009889,GO:0009987,GO:0010026,GO:…	ko:K14491
spt_1009825	COBRAlike protein 7	GO:0005886,GO:0010215,GO:0030246,GO:0031225,GO:0098552	-
spt_1009826	cellulose synthaselike protein D5	GO:0000030,GO:0000139,GO:0000271,GO:0000278,GO:0000281,GO:0000910,GO:0000911,GO:0000919,GO:0001101,GO:0003674,GO:0003824,GO:0005575,GO:0005622,GO:0005623,GO:0005737,GO:0005794,GO:0005975,GO:0005976,GO:0006073,GO:0006950,GO:0006970,GO:0007049,GO:0007275,GO:0008150,GO:0008152,GO:0008194,GO:0009058,GO:0009059,GO:0009250,GO:0009414,GO:0009415,GO:0009628,GO:0009651,GO:0009833,GO:0009987,GO:0010035,GO:…	ko:K00770
spt_1009827	galacturonosyltransferaselike 7	GO:0000003,GO:0000139,GO:0000271,GO:0003006,GO:0003674,GO:0003824,GO:0005575,GO:0005622,GO:0005623,GO:0005737,GO:0005783,GO:0005794,GO:0005975,GO:0005976,GO:0007275,GO:0008150,GO:0008152,GO:0008194,GO:0009058,GO:0009059,GO:0009664,GO:0009791,GO:0009832,GO:0009987,GO:0010154,GO:0010191,GO:0010192,GO:0010214,GO:0010393,GO:0012505,GO:0016020,GO:0016021,GO:0016043,GO:0016051,GO:0016740,GO:0016757,GO:…	-
spt_1009886	betacarotene isomerase D27, chloroplastic	GO:0005506,GO:0016853	-
spt_1010281	LOC104879829	GO:0003746,GO:0006414,GO:0016874	-
spt_1010386	disease resistance protein RPM1	GO:0000166,GO:0002376,GO:0003674,GO:0005488,GO:0005524,GO:0005575,GO:0005622,GO:0005623,GO:0005737,GO:0005886,GO:0005911,GO:0006950,GO:0006952,GO:0006955,GO:0007154,GO:0007165,GO:0008144,GO:0008150,GO:0008219,GO:0009506,GO:0009605,GO:0009607,GO:0009626,GO:0009814,GO:0009987,GO:0012501,GO:0012505,GO:0016020,GO:0017076,GO:0019897,GO:0019898,GO:0023052,GO:0030054,GO:0030554,GO:0032553,GO:0032555,GO:…	ko:K13457
spt_1010387	VITISV_005773	GO:0003677	-
spt_1010769	probable sodiummetabolite cotransporter BASS3, chloroplastic	GO:0003674,GO:0005215,GO:0005575,GO:0005622,GO:0005623,GO:0005737,GO:0005886,GO:0006810,GO:0006811,GO:0006812,GO:0006814,GO:0008150,GO:0009507,GO:0009526,GO:0009536,GO:0009941,GO:0015291,GO:0015293,GO:0015672,GO:0016020,GO:0016021,GO:0022804,GO:0022857,GO:0030001,GO:0031224,GO:0031967,GO:0031975,GO:0043226,GO:0043227,GO:0043229,GO:0043231,GO:0043879,GO:0044422,GO:0044424,GO:0044425,GO:0044434,GO:…	ko:K03453
spt_1010770	disease resistance RPP13like protein 1	GO:0002215,GO:0003724,GO:0004663,GO:0005515,GO:0005524,GO:0005737,GO:0005886,GO:0006952,GO:0006955,GO:0010102,GO:0012501,GO:0016020,GO:0016787,GO:0033554,GO:0043531,GO:0045177,GO:0048226,GO:0051707	-
spt_1010800	LOC117919066	GO:0016020	-
spt_1010801	LOC117919066	GO:0005515,GO:0005516,GO:0005634,GO:0030139	-
spt_1010802	-	GO:0000003,GO:0000166,GO:0000287,GO:0003006,GO:0003674,GO:0003824,GO:0004743,GO:0005488,GO:0005524,GO:0005575,GO:0005622,GO:0005623,GO:0005737,GO:0005975,GO:0006082,GO:0006090,GO:0006091,GO:0006096,GO:0006139,GO:0006163,GO:0006164,GO:0006165,GO:0006725,GO:0006732,GO:0006733,GO:0006753,GO:0006754,GO:0006757,GO:0006793,GO:0006796,GO:0006807,GO:0007275,GO:0008144,GO:0008150,GO:0008152,GO:0009056,GO:…	ko:K00873
spt_1012145	LOC100262578	GO:0006396,GO:0016020,GO:0035194	ko:K06100
spt_1012146	CK203_029293	GO:0003677,GO:0004519,GO:0006281	ko:K12604
spt_1012157	trihelix transcription factor GT3b	GO:0000981,GO:0003674,GO:0003676,GO:0003677,GO:0003700,GO:0005488,GO:0005575,GO:0005622,GO:0005623,GO:0005634,GO:0005654,GO:0005730,GO:0006139,GO:0006351,GO:0006355,GO:0006357,GO:0006725,GO:0006807,GO:0008150,GO:0008152,GO:0009058,GO:0009059,GO:0009889,GO:0009987,GO:0010467,GO:0010468,GO:0010556,GO:0016070,GO:0016592,GO:0018130,GO:0019219,GO:0019222,GO:0019438,GO:0031323,GO:0031326,GO:0031974,GO:…	-
spt_1012158	CK203_081268	-	-
spt_1012159	LOC117919775 isoform X1	-	-
spt_1012160	omega3 fatty acid desaturase, chloroplasticlike	GO:0003674,GO:0003824,GO:0005575,GO:0005622,GO:0005623,GO:0005737,GO:0006082,GO:0006629,GO:0006631,GO:0006633,GO:0006636,GO:0008150,GO:0008152,GO:0008610,GO:0009058,GO:0009507,GO:0009526,GO:0009536,GO:0009941,GO:0009987,GO:0016020,GO:0016053,GO:0016491,GO:0016705,GO:0016717,GO:0019752,GO:0019904,GO:0031090,GO:0031967,GO:0031969,GO:0031975,GO:0032787,GO:0033559,GO:0042170,GO:0042389,GO:0043226,GO:…	ko:K10257
spt_1012175	protein SCO1 homolog 1	GO:0000003,GO:0000041,GO:0003006,GO:0003674,GO:0005488,GO:0005507,GO:0005575,GO:0005622,GO:0005623,GO:0005737,GO:0005739,GO:0005740,GO:0005743,GO:0006810,GO:0006811,GO:0006812,GO:0006825,GO:0006873,GO:0006875,GO:0006878,GO:0006996,GO:0007005,GO:0007275,GO:0008150,GO:0008535,GO:0009507,GO:0009790,GO:0009791,GO:0009793,GO:0009987,GO:0010154,GO:0012505,GO:0016020,GO:0016021,GO:0016043,GO:0016209,GO:…	ko:K07152
spt_1012176	AMP deaminase isoform X2	GO:0000003,GO:0000166,GO:0001101,GO:0003006,GO:0003674,GO:0003824,GO:0003876,GO:0005488,GO:0005515,GO:0005524,GO:0005575,GO:0005622,GO:0005623,GO:0005634,GO:0005737,GO:0005739,GO:0005740,GO:0005741,GO:0005783,GO:0005829,GO:0006139,GO:0006163,GO:0006164,GO:0006188,GO:0006351,GO:0006725,GO:0006753,GO:0006793,GO:0006796,GO:0006807,GO:0007275,GO:0008144,GO:0008150,GO:0008152,GO:0009058,GO:0009117,GO:…	ko:K01490
spt_1012177	chlorophyll synthase, chloroplastic	GO:0003674,GO:0003824,GO:0004659,GO:0005575,GO:0005622,GO:0005623,GO:0005737,GO:0006725,GO:0006778,GO:0006779,GO:0006807,GO:0008150,GO:0008152,GO:0009058,GO:0009507,GO:0009526,GO:0009534,GO:0009536,GO:0009579,GO:0009941,GO:0009987,GO:0015994,GO:0015995,GO:0016020,GO:0016021,GO:0016740,GO:0016765,GO:0018130,GO:0019438,GO:0031090,GO:0031224,GO:0031967,GO:0031969,GO:0031975,GO:0031976,GO:0031984,GO:…	ko:K04040
spt_1012220	unnamed	GO:0001067,GO:0003677,GO:0003700,GO:0005634,GO:0006355,GO:0009736,GO:0010026,GO:0010158,GO:0010597,GO:0090506	-
spt_1012221	ethyleneoverproduction protein 1 isoform X1	GO:0000160,GO:0005515,GO:0005575,GO:0005622,GO:0005623,GO:0006464,GO:0006807,GO:0007154,GO:0007165,GO:0008150,GO:0008152,GO:0009719,GO:0009723,GO:0009725,GO:0009737,GO:0009755,GO:0009873,GO:0009987,GO:0010033,GO:0010105,GO:0012505,GO:0016020,GO:0016567,GO:0016740,GO:0019538,GO:0023052,GO:0032446,GO:0032870,GO:0035556,GO:0036211,GO:0042221,GO:0043170,GO:0043412,GO:0044237,GO:0044238,GO:0044260,GO:…	-
spt_1012222	LOC117921091	-	-
spt_1012245	serinethreonineprotein phosphatase 7 long form homolog	-	-
spt_1012246	abscisic acid receptor PYL4	GO:0004864,GO:0005634,GO:0005737,GO:0005886,GO:0009738,GO:0010427,GO:0016740,GO:0038023	ko:K14496
spt_1012247	protein trichome birefringencelike 34	GO:0005794,GO:0016020,GO:0016413,GO:0016740	-
spt_1012248	protein trichome birefringencelike 35	GO:0000271,GO:0003674,GO:0003824,GO:0005575,GO:0005622,GO:0005623,GO:0005737,GO:0005794,GO:0005975,GO:0005976,GO:0008150,GO:0008152,GO:0008374,GO:0009058,GO:0009059,GO:0009987,GO:0010383,GO:0010410,GO:0012505,GO:0016020,GO:0016021,GO:0016051,GO:0016407,GO:0016413,GO:0016740,GO:0016746,GO:0016747,GO:0031224,GO:0033692,GO:0034637,GO:0034645,GO:0042546,GO:0043170,GO:0043226,GO:0043227,GO:0043229,GO:…	-
spt_1012257	macrophage migration inhibitory factor homolog isoform X2	GO:0005615,GO:0005634,GO:0005777,GO:0050178	ko:K07253
spt_1012258	protein SIEL isoform X1	GO:0003002,GO:0005515,GO:0005575,GO:0005622,GO:0005623,GO:0005634,GO:0005737,GO:0005768,GO:0005794,GO:0005829,GO:0005938,GO:0006139,GO:0006396,GO:0006725,GO:0006807,GO:0006810,GO:0007275,GO:0007389,GO:0008150,GO:0008152,GO:0009506,GO:0009956,GO:0009987,GO:0010467,GO:0010496,GO:0012505,GO:0016070,GO:0016073,GO:0016180,GO:0022622,GO:0031123,GO:0031410,GO:0031982,GO:0032501,GO:0032502,GO:0034470,GO:…	ko:K13141
spt_1012259	unnamed	GO:0003674,GO:0003779,GO:0005488,GO:0005515,GO:0005829,GO:0006464,GO:0006807,GO:0008092,GO:0008150,GO:0008152,GO:0008582,GO:0009987,GO:0016567,GO:0019538,GO:0019762,GO:0032446,GO:0034976,GO:0036211,GO:0040008,GO:0042802,GO:0042803,GO:0043170,GO:0043412,GO:0044087,GO:0044237,GO:0044238,GO:0044260,GO:0044267,GO:0045886,GO:0045926,GO:0046983,GO:0048519,GO:0048523,GO:0048638,GO:0048640,GO:0050789,GO:…	ko:K10442,ko:K10446,ko:K10457
spt_1012260	unnamed	GO:0003674,GO:0003779,GO:0005488,GO:0005515,GO:0006464,GO:0006807,GO:0008092,GO:0008150,GO:0008152,GO:0008582,GO:0009987,GO:0016567,GO:0019538,GO:0032446,GO:0034976,GO:0036211,GO:0040008,GO:0042802,GO:0042803,GO:0043170,GO:0043412,GO:0044087,GO:0044237,GO:0044238,GO:0044260,GO:0044267,GO:0045886,GO:0045926,GO:0046983,GO:0048519,GO:0048523,GO:0048638,GO:0048640,GO:0050789,GO:0050793,GO:0050794,GO:…	ko:K10442,ko:K10446,ko:K10457
spt_1012293	PAN domaincontaining protein At5g03700	GO:0000003,GO:0005575,GO:0005576,GO:0005622,GO:0005623,GO:0005737,GO:0005768,GO:0005794,GO:0005802,GO:0005886,GO:0006338,GO:0007154,GO:0008037,GO:0008150,GO:0009856,GO:0009875,GO:0009987,GO:0012505,GO:0016020,GO:0016021,GO:0016301,GO:0016773,GO:0022414,GO:0030246,GO:0031224,GO:0031410,GO:0031982,GO:0031984,GO:0032501,GO:0043226,GO:0043227,GO:0043229,GO:0043231,GO:0044422,GO:0044424,GO:0044425,GO:…	-
spt_1012301	stress response protein nst1	GO:0016020,GO:0016491,GO:0046872,GO:0051536	-
spt_1012302	-	GO:0000166,GO:0000287,GO:0003674,GO:0003824,GO:0004455,GO:0005488,GO:0005507,GO:0005515,GO:0005575,GO:0005576,GO:0005618,GO:0005622,GO:0005623,GO:0005737,GO:0005739,GO:0006082,GO:0006520,GO:0006549,GO:0006573,GO:0006807,GO:0008150,GO:0008152,GO:0008652,GO:0009058,GO:0009081,GO:0009082,GO:0009097,GO:0009099,GO:0009507,GO:0009526,GO:0009532,GO:0009536,GO:0009570,GO:0009941,GO:0009987,GO:0010035,GO:…	ko:K00053
spt_1012303	Adenineguanine permease AZG1	GO:0003674,GO:0005215,GO:0005345,GO:0005575,GO:0005886,GO:0006810,GO:0006863,GO:0008150,GO:0012505,GO:0015205,GO:0015851,GO:0015853,GO:0015854,GO:0016020,GO:0016021,GO:0022857,GO:0031224,GO:0044425,GO:0051179,GO:0051234,GO:0055085,GO:0071702,GO:0071705,GO:0072530,GO:1904823	ko:K06901
spt_1012360	protein FAR1RELATED SEQUENCE 3	GO:0005634,GO:0006355,GO:0008270	-
spt_1012361	exportin7 isoform X1	GO:0003674,GO:0005049,GO:0005488,GO:0005515,GO:0005575,GO:0005622,GO:0005623,GO:0005634,GO:0005635,GO:0005643,GO:0005737,GO:0005829,GO:0006403,GO:0006611,GO:0006810,GO:0006886,GO:0006913,GO:0008104,GO:0008150,GO:0008536,GO:0012505,GO:0015031,GO:0015833,GO:0015931,GO:0016020,GO:0017016,GO:0019899,GO:0031267,GO:0031967,GO:0031975,GO:0032991,GO:0033036,GO:0034613,GO:0042886,GO:0043226,GO:0043227,GO:…	ko:K18460
spt_1012362	Retrovirusrelated Pol polyprotein	GO:0003676,GO:0008270	-
spt_1012394	LOC100263596	GO:0000375,GO:0000377,GO:0000380,GO:0000398,GO:0001817,GO:0001819,GO:0002218,GO:0002230,GO:0002252,GO:0002253,GO:0002376,GO:0002682,GO:0002684,GO:0002697,GO:0002831,GO:0003674,GO:0003676,GO:0003677,GO:0003690,GO:0003700,GO:0003712,GO:0003713,GO:0005488,GO:0005515,GO:0005575,GO:0005622,GO:0005623,GO:0005634,GO:0005654,GO:0005737,GO:0005829,GO:0006139,GO:0006351,GO:0006355,GO:0006396,GO:0006397,GO:…	ko:K12865
spt_1012396	probable E3 ubiquitinprotein ligase RHC1A	GO:0000003,GO:0000209,GO:0000820,GO:0000902,GO:0000904,GO:0001101,GO:0003006,GO:0003674,GO:0003824,GO:0004842,GO:0005488,GO:0005575,GO:0005618,GO:0005622,GO:0005623,GO:0005634,GO:0005737,GO:0006464,GO:0006508,GO:0006511,GO:0006521,GO:0006807,GO:0006950,GO:0006970,GO:0007275,GO:0008150,GO:0008152,GO:0008270,GO:0009056,GO:0009057,GO:0009414,GO:0009415,GO:0009628,GO:0009651,GO:0009653,GO:0009707,GO:…	ko:K11982
spt_1012397	nascent polypeptideassociated complex subunit alphalike protein 1	GO:0005575,GO:0005622,GO:0005623,GO:0005737,GO:0005854,GO:0006612,GO:0006810,GO:0008104,GO:0008150,GO:0015031,GO:0015833,GO:0016020,GO:0032991,GO:0033036,GO:0042886,GO:0044424,GO:0044444,GO:0044464,GO:0045184,GO:0051082,GO:0051179,GO:0051234,GO:0071702,GO:0071705	ko:K03626
spt_1012398	transcription elongation factor SPT6 homolog	GO:0000003,GO:0000018,GO:0000785,GO:0000988,GO:0000990,GO:0000991,GO:0002637,GO:0002682,GO:0002694,GO:0002697,GO:0002700,GO:0002703,GO:0002706,GO:0002712,GO:0002819,GO:0002822,GO:0002889,GO:0003006,GO:0003674,GO:0003676,GO:0003677,GO:0003682,GO:0003700,GO:0003723,GO:0003746,GO:0005488,GO:0005515,GO:0005575,GO:0005622,GO:0005623,GO:0005634,GO:0005654,GO:0005694,GO:0005737,GO:0005829,GO:0005911,GO:…	ko:K11292
spt_1012399	LOC117920186	GO:0003735,GO:0005637,GO:0005840,GO:0006325,GO:0006412,GO:0016787,GO:0042393,GO:1990904	-
spt_1012400	VITISV_029782	GO:0003964,GO:0004812,GO:0005524,GO:0006278,GO:0016020,GO:0043039	-
spt_1012488	scopoletin glucosyltransferaselike	GO:0004142,GO:0006657,GO:0008194,GO:0009718,GO:0035251,GO:0046527	ko:K13496
spt_1012489	pentatricopeptide repeatcontaining protein At2g32630	GO:0003674,GO:0003676,GO:0003723,GO:0003727,GO:0003729,GO:0003735,GO:0003824,GO:0004518,GO:0004519,GO:0005488,GO:0005515,GO:0005575,GO:0005622,GO:0005623,GO:0005739,GO:0005783,GO:0006139,GO:0006396,GO:0006725,GO:0006807,GO:0007005,GO:0008150,GO:0008152,GO:0009451,GO:0009507,GO:0009793,GO:0009987,GO:0010019,GO:0016070,GO:0016554,GO:0016787,GO:0016788,GO:0022626,GO:0031930,GO:0034641,GO:0043170,GO:…	ko:K17964
spt_1012490	RNA polymerase sigma factor sigF, chloroplastic isoform X1	GO:0002215,GO:0003700,GO:0004663,GO:0004672,GO:0005515,GO:0005524,GO:0005886,GO:0006352,GO:0006355,GO:0010102,GO:0016020,GO:0033612,GO:0045177,GO:0048226	-
spt_1012491	serinethreonineprotein kinase PCRK1like isoform X1	GO:0000166,GO:0002215,GO:0002218,GO:0002221,GO:0002253,GO:0002376,GO:0002682,GO:0002684,GO:0002757,GO:0002758,GO:0002764,GO:0003674,GO:0003824,GO:0004672,GO:0004674,GO:0004675,GO:0004888,GO:0005488,GO:0005515,GO:0005524,GO:0005575,GO:0005623,GO:0005634,GO:0005730,GO:0005886,GO:0006338,GO:0006464,GO:0006468,GO:0006793,GO:0006796,GO:0006807,GO:0006950,GO:0006952,GO:0007154,GO:0007165,GO:0007166,GO:…	-
spt_1012492	Retrovirusrelated Pol polyprotein	GO:0003676,GO:0004190,GO:0008270,GO:0009987,GO:0015074	-
spt_1012493	Retrovirusrelated Pol polyprotein	GO:0003674,GO:0003676,GO:0003824,GO:0003964,GO:0004175,GO:0004190,GO:0004518,GO:0004519,GO:0005488,GO:0006139,GO:0006259,GO:0006278,GO:0006508,GO:0006725,GO:0006807,GO:0008150,GO:0008152,GO:0008233,GO:0008270,GO:0009058,GO:0009059,GO:0009987,GO:0015074,GO:0016740,GO:0016772,GO:0016779,GO:0016787,GO:0016788,GO:0018130,GO:0019438,GO:0019538,GO:0034061,GO:0034641,GO:0034645,GO:0034654,GO:0043167,GO:…	-
spt_1012494	OTU domaincontaining protein DDB_G0284757 isoform X2	GO:0004843,GO:0006508,GO:0009987,GO:0016579	-
spt_1012495	transcription factor TCP11	GO:0003674,GO:0003676,GO:0003677,GO:0003700,GO:0005488,GO:0005575,GO:0005622,GO:0005623,GO:0005634,GO:0006139,GO:0006351,GO:0006355,GO:0006725,GO:0006807,GO:0007275,GO:0007623,GO:0008150,GO:0008152,GO:0009058,GO:0009059,GO:0009889,GO:0009987,GO:0010467,GO:0010468,GO:0010556,GO:0016070,GO:0018130,GO:0019219,GO:0019222,GO:0019438,GO:0031323,GO:0031326,GO:0032501,GO:0032502,GO:0032774,GO:0034641,GO:…	-
spt_1012501	LOC100253355	GO:0009733,GO:0043565	ko:K14488
spt_1012502	LOC100258485	GO:0016020	-
spt_1012503	isocitrate dehydrogenase	GO:0000166,GO:0000287,GO:0003674,GO:0003824,GO:0003862,GO:0004448,GO:0004449,GO:0005488,GO:0005524,GO:0005575,GO:0005622,GO:0005623,GO:0005737,GO:0005739,GO:0006082,GO:0006091,GO:0006099,GO:0006101,GO:0006102,GO:0006520,GO:0006551,GO:0006807,GO:0008144,GO:0008150,GO:0008152,GO:0008270,GO:0008652,GO:0009058,GO:0009060,GO:0009081,GO:0009082,GO:0009098,GO:0009507,GO:0009536,GO:0009987,GO:0015980,GO:…	ko:K00030
spt_1012506	LOW QUALITY PROTEIN: ethyleneinsensitive protein 2	GO:0000160,GO:0001736,GO:0001738,GO:0002009,GO:0002237,GO:0002376,GO:0003674,GO:0003676,GO:0003723,GO:0003729,GO:0005215,GO:0005384,GO:0005488,GO:0005575,GO:0005622,GO:0005623,GO:0005634,GO:0005737,GO:0005783,GO:0005789,GO:0005802,GO:0005886,GO:0006810,GO:0006811,GO:0006812,GO:0006950,GO:0006952,GO:0006955,GO:0006970,GO:0007154,GO:0007164,GO:0007165,GO:0007275,GO:0007568,GO:0008150,GO:0008324,GO:…	ko:K14513
spt_1012507	synaptotagmin3 isoform X1	GO:0005515,GO:0005783,GO:0006869,GO:0008289,GO:0016020	-
spt_1012508	pentatricopeptide repeatcontaining protein At2g37230	GO:0003674,GO:0003676,GO:0003723,GO:0003727,GO:0003729,GO:0003735,GO:0003824,GO:0004518,GO:0004519,GO:0005488,GO:0005515,GO:0005575,GO:0005622,GO:0005623,GO:0005737,GO:0005739,GO:0005783,GO:0006139,GO:0006725,GO:0006807,GO:0006950,GO:0008150,GO:0008152,GO:0009266,GO:0009409,GO:0009451,GO:0009507,GO:0009534,GO:0009535,GO:0009536,GO:0009579,GO:0009628,GO:0009793,GO:0009987,GO:0016020,GO:0016070,GO:…	-
spt_1012509	Protein CNGC15c	GO:0003674,GO:0003676,GO:0003723,GO:0005215,GO:0005216,GO:0005244,GO:0005249,GO:0005261,GO:0005262,GO:0005267,GO:0005488,GO:0005515,GO:0005516,GO:0005575,GO:0005622,GO:0005623,GO:0005634,GO:0005635,GO:0005730,GO:0005829,GO:0005886,GO:0006810,GO:0006811,GO:0006812,GO:0006813,GO:0006816,GO:0008150,GO:0008324,GO:0009735,GO:0009877,GO:0009987,GO:0010445,GO:0012505,GO:0015075,GO:0015077,GO:0015079,GO:…	ko:K05391
spt_1012714	aspartic proteinase PCS1	GO:0003674,GO:0003824,GO:0004175,GO:0004190,GO:0005575,GO:0005576,GO:0005622,GO:0005623,GO:0005737,GO:0005783,GO:0006508,GO:0006807,GO:0008150,GO:0008152,GO:0008219,GO:0008233,GO:0009056,GO:0009057,GO:0009987,GO:0012501,GO:0012505,GO:0016020,GO:0016787,GO:0016798,GO:0019538,GO:0030163,GO:0043170,GO:0043226,GO:0043227,GO:0043229,GO:0043231,GO:0044238,GO:0044424,GO:0044444,GO:0044464,GO:0045493,GO:…	-
spt_1012715	LOC100249439	GO:0009535,GO:0032055	-
spt_1012716	U3 small nucleolar RNAassociated protein 21 homolog	GO:0005515,GO:0005634,GO:0005730,GO:0006364,GO:0010492,GO:0032040,GO:0034388	ko:K14554
spt_1014325	LOC100255938	GO:0005886,GO:0009506	-
spt_1014326	UPF0481 protein At3g02645	GO:0016020	-
spt_1014412	disease resistance protein RGA3	GO:0000166,GO:0003674,GO:0005488,GO:0005524,GO:0005575,GO:0005623,GO:0005886,GO:0006950,GO:0006952,GO:0007154,GO:0007165,GO:0008144,GO:0008150,GO:0009987,GO:0016020,GO:0017076,GO:0023052,GO:0030554,GO:0032553,GO:0032555,GO:0032559,GO:0035639,GO:0036094,GO:0043167,GO:0043168,GO:0043531,GO:0044464,GO:0050789,GO:0050794,GO:0050896,GO:0051716,GO:0065007,GO:0071944,GO:0097159,GO:0097367,GO:1901265,GO:…	-
spt_1014413	VITISV_021900	-	-
spt_1014414	Retrovirusrelated Pol polyprotein	-	-
spt_1014415	ProPol polyprotein	GO:0003676,GO:0009987,GO:0015074,GO:0016020	-
spt_1014416	disease resistance protein RGA3	GO:0000166,GO:0003674,GO:0005488,GO:0005515,GO:0005524,GO:0005575,GO:0005623,GO:0005886,GO:0006950,GO:0006952,GO:0007154,GO:0007165,GO:0008144,GO:0008150,GO:0009987,GO:0016020,GO:0017076,GO:0023052,GO:0030554,GO:0032553,GO:0032555,GO:0032559,GO:0035639,GO:0036094,GO:0043167,GO:0043168,GO:0043531,GO:0044464,GO:0050789,GO:0050794,GO:0050896,GO:0051716,GO:0065007,GO:0071944,GO:0097159,GO:0097367,GO:…	-
spt_1015508	transmembrane protein 184 homolog DDB_G0279555like	GO:0016020,GO:0022857,GO:0055085	-
spt_1015509	betagalactosidase 8like isoform X1	GO:0000014,GO:0003676,GO:0004521,GO:0004553,GO:0004565,GO:0005773,GO:0005975,GO:0006308,GO:0009341,GO:0009505,GO:0009827,GO:0016020,GO:0030246,GO:0044282	-
spt_1015510	VITISV_008189	GO:0000166,GO:0003674,GO:0003824,GO:0003960,GO:0005488,GO:0005515,GO:0005575,GO:0005622,GO:0005623,GO:0005737,GO:0005829,GO:0006139,GO:0006725,GO:0006732,GO:0006733,GO:0006739,GO:0006753,GO:0006793,GO:0006796,GO:0006807,GO:0008150,GO:0008152,GO:0009117,GO:0009987,GO:0010941,GO:0016491,GO:0016651,GO:0016655,GO:0019362,GO:0019637,GO:0034045,GO:0034641,GO:0036094,GO:0042802,GO:0042803,GO:0042981,GO:…	ko:K00344
spt_1016269	Retrovirusrelated Pol polyprotein	GO:0016301	-
spt_1016270	Protein FORGETTER 1	GO:0000184,GO:0000428,GO:0000956,GO:0001101,GO:0003674,GO:0003676,GO:0003723,GO:0003824,GO:0004647,GO:0004721,GO:0004722,GO:0005488,GO:0005575,GO:0005622,GO:0005623,GO:0005634,GO:0005654,GO:0006139,GO:0006351,GO:0006355,GO:0006357,GO:0006401,GO:0006402,GO:0006464,GO:0006470,GO:0006725,GO:0006793,GO:0006796,GO:0006807,GO:0006950,GO:0006970,GO:0007154,GO:0007165,GO:0007275,GO:0008150,GO:0008152,GO:…	ko:K18998
spt_1016271	Transposon Tf22 polyprotein	-	-
spt_1016272	exopolyphosphatase PRUNE1like	GO:0004309,GO:0004427,GO:0005737,GO:0016020,GO:0016462	ko:K01514
spt_1016273	VITISV_014045	GO:0016301	-
spt_1016359	VITISV_032143	GO:0003676,GO:0003964,GO:0004519,GO:0006278,GO:0015074,GO:0016020	-
spt_1016360	Retrovirusrelated Pol polyprotein	GO:0003964,GO:0006278	-
spt_1016560	pyruvate kinase, cytosolic isozyme	GO:0000166,GO:0000287,GO:0003674,GO:0003824,GO:0004743,GO:0005488,GO:0005524,GO:0005575,GO:0005622,GO:0005623,GO:0005737,GO:0005975,GO:0006082,GO:0006090,GO:0006091,GO:0006096,GO:0006139,GO:0006163,GO:0006164,GO:0006165,GO:0006725,GO:0006732,GO:0006733,GO:0006753,GO:0006754,GO:0006757,GO:0006793,GO:0006796,GO:0006807,GO:0008144,GO:0008150,GO:0008152,GO:0009056,GO:0009058,GO:0009108,GO:0009117,GO:…	ko:K00873
spt_1018428	-	GO:0000139,GO:0000271,GO:0000278,GO:0000281,GO:0000910,GO:0003674,GO:0003824,GO:0005575,GO:0005622,GO:0005623,GO:0005737,GO:0005794,GO:0005886,GO:0005975,GO:0005976,GO:0006073,GO:0007049,GO:0007275,GO:0008150,GO:0008152,GO:0008194,GO:0009058,GO:0009059,GO:0009250,GO:0009653,GO:0009832,GO:0009833,GO:0009888,GO:0009987,GO:0010015,GO:0010053,GO:0010054,GO:0012505,GO:0016020,GO:0016021,GO:0016043,GO:…	-
spt_1018429	cellulose synthaselike protein H1 isoform X1	GO:0000139,GO:0000271,GO:0000278,GO:0000281,GO:0000910,GO:0003674,GO:0003824,GO:0005575,GO:0005622,GO:0005623,GO:0005737,GO:0005794,GO:0005886,GO:0005975,GO:0005976,GO:0006073,GO:0007049,GO:0007275,GO:0008150,GO:0008152,GO:0008194,GO:0009058,GO:0009059,GO:0009250,GO:0009653,GO:0009832,GO:0009833,GO:0009888,GO:0009987,GO:0010015,GO:0010053,GO:0010054,GO:0012505,GO:0016020,GO:0016021,GO:0016043,GO:…	-
spt_1018430	Cellulose synthaselike protein H1	GO:0000139,GO:0000271,GO:0000278,GO:0000281,GO:0000910,GO:0003674,GO:0003824,GO:0005575,GO:0005622,GO:0005623,GO:0005737,GO:0005794,GO:0005886,GO:0005975,GO:0005976,GO:0006073,GO:0007049,GO:0007275,GO:0008150,GO:0008152,GO:0008194,GO:0009058,GO:0009059,GO:0009250,GO:0009653,GO:0009832,GO:0009833,GO:0009888,GO:0009987,GO:0010015,GO:0010053,GO:0010054,GO:0012505,GO:0016020,GO:0016021,GO:0016043,GO:…	-
spt_1019805	adenylate kinase 1, chloroplasticlike	GO:0000166,GO:0003674,GO:0003824,GO:0004017,GO:0005488,GO:0005524,GO:0005575,GO:0005622,GO:0005623,GO:0005737,GO:0005739,GO:0005829,GO:0006139,GO:0006725,GO:0006753,GO:0006793,GO:0006796,GO:0006807,GO:0008144,GO:0008150,GO:0008152,GO:0009058,GO:0009117,GO:0009123,GO:0009165,GO:0009507,GO:0009536,GO:0009987,GO:0016301,GO:0016310,GO:0016740,GO:0016772,GO:0016776,GO:0016787,GO:0017076,GO:0018130,GO:…	ko:K00939
spt_1019847	splicing factor 3B subunit 3	GO:0000398,GO:0003676,GO:0005515,GO:0005634,GO:0120114,GO:1990904	ko:K12830
spt_1019848	dirigent protein 16like	GO:0009699,GO:0009987,GO:0016020,GO:0048046	-
spt_1019849	dirigent protein 24	GO:0005575,GO:0005576,GO:0009699,GO:0009987,GO:0016020,GO:0048046	-
spt_1019850	dirigent protein 25like	GO:0009699,GO:0009987,GO:0048046	-
spt_1019851	LOC100248502	-	-
spt_1019852	glutathione Stransferase DHAR2like	GO:0000302,GO:0001101,GO:0003674,GO:0003824,GO:0004364,GO:0005215,GO:0005244,GO:0005488,GO:0005507,GO:0005515,GO:0005575,GO:0005576,GO:0005622,GO:0005623,GO:0005737,GO:0005739,GO:0005773,GO:0005777,GO:0005829,GO:0005886,GO:0005975,GO:0005996,GO:0006082,GO:0006464,GO:0006518,GO:0006575,GO:0006732,GO:0006749,GO:0006766,GO:0006767,GO:0006790,GO:0006807,GO:0006810,GO:0006811,GO:0006950,GO:0006952,GO:…	ko:K21888
spt_1019853	LOC117929044	GO:0004180,GO:0016020,GO:0016740,GO:0032502,GO:0051213	-
spt_1019855	probable sulfate transporter 4.2 isoform X1	GO:0003674,GO:0005215,GO:0005575,GO:0005622,GO:0005623,GO:0005737,GO:0005886,GO:0005887,GO:0006810,GO:0006811,GO:0006820,GO:0008150,GO:0008271,GO:0008272,GO:0008509,GO:0009507,GO:0009526,GO:0009536,GO:0009705,GO:0009941,GO:0015075,GO:0015103,GO:0015116,GO:0015291,GO:0015293,GO:0015318,GO:0015698,GO:0016020,GO:0016021,GO:0022804,GO:0022857,GO:0031090,GO:0031224,GO:0031226,GO:0031967,GO:0031969,GO:…	ko:K18059
spt_1019856	metal tolerance protein 11	GO:0003674,GO:0005215,GO:0005575,GO:0005622,GO:0005623,GO:0005737,GO:0005770,GO:0005773,GO:0005774,GO:0005794,GO:0006810,GO:0006811,GO:0006812,GO:0008150,GO:0008324,GO:0010042,GO:0010486,GO:0015075,GO:0016020,GO:0016021,GO:0022857,GO:0030026,GO:0031090,GO:0031224,GO:0034220,GO:0043226,GO:0043227,GO:0043229,GO:0043231,GO:0044422,GO:0044424,GO:0044425,GO:0044437,GO:0044444,GO:0044446,GO:0044464,GO:…	-
spt_1019881	2oxoglutarate dehydrogenase	GO:0003674,GO:0003735,GO:0003824,GO:0003924,GO:0004591,GO:0005488,GO:0005525,GO:0005575,GO:0005622,GO:0005623,GO:0005737,GO:0005739,GO:0005759,GO:0005840,GO:0005947,GO:0005975,GO:0006082,GO:0006090,GO:0006091,GO:0006096,GO:0006099,GO:0006101,GO:0006139,GO:0006163,GO:0006164,GO:0006165,GO:0006412,GO:0006725,GO:0006732,GO:0006733,GO:0006753,GO:0006754,GO:0006757,GO:0006793,GO:0006796,GO:0006807,GO:…	ko:K00164
spt_1019882	rasrelated protein RABE1c	GO:0000139,GO:0000160,GO:0000166,GO:0001882,GO:0001883,GO:0002790,GO:0003674,GO:0003824,GO:0003924,GO:0005488,GO:0005515,GO:0005525,GO:0005575,GO:0005622,GO:0005623,GO:0005737,GO:0005773,GO:0005774,GO:0005794,GO:0005886,GO:0006810,GO:0006887,GO:0006904,GO:0007154,GO:0007165,GO:0008104,GO:0008150,GO:0009306,GO:0009719,GO:0009723,GO:0009725,GO:0009755,GO:0009873,GO:0009987,GO:0010033,GO:0012505,GO:…	ko:K07901
spt_1019883	unnamed	GO:0003674,GO:0003735,GO:0005198,GO:0005575,GO:0005622,GO:0005623,GO:0005737,GO:0005829,GO:0005840,GO:0006412,GO:0006518,GO:0006807,GO:0008150,GO:0008152,GO:0009058,GO:0009059,GO:0009507,GO:0009987,GO:0010467,GO:0015935,GO:0019538,GO:0022626,GO:0022627,GO:0032991,GO:0034641,GO:0034645,GO:0043043,GO:0043170,GO:0043226,GO:0043228,GO:0043229,GO:0043232,GO:0043603,GO:0043604,GO:0044237,GO:0044238,GO:…	ko:K02957
spt_1019884	transcription factor bHLH123 isoform X2	GO:0000978,GO:0001067,GO:0003677,GO:0003700,GO:0005634,GO:0006355,GO:0046983	ko:K05765
spt_1019886	unnamed	GO:0003779,GO:0005737,GO:0015629,GO:0030042,GO:0044877,GO:0051017	ko:K05765
spt_1019888	pentatricopeptide repeatcontaining protein At2g39620	GO:0003674,GO:0003676,GO:0003723,GO:0003727,GO:0003735,GO:0003824,GO:0004518,GO:0004519,GO:0005488,GO:0005515,GO:0005575,GO:0005622,GO:0005623,GO:0005737,GO:0005739,GO:0005783,GO:0006139,GO:0006725,GO:0006807,GO:0008150,GO:0008152,GO:0008270,GO:0009451,GO:0009507,GO:0009793,GO:0009987,GO:0016070,GO:0016071,GO:0016554,GO:0016556,GO:0016787,GO:0016788,GO:0022626,GO:0034641,GO:0043170,GO:0043226,GO:…	-
spt_1019889	elongator complex protein 1	GO:0000003,GO:0000049,GO:0001101,GO:0001510,GO:0002097,GO:0002098,GO:0002926,GO:0003006,GO:0003674,GO:0003824,GO:0005515,GO:0005575,GO:0005622,GO:0005623,GO:0005634,GO:0005737,GO:0005829,GO:0006139,GO:0006351,GO:0006355,GO:0006396,GO:0006399,GO:0006400,GO:0006725,GO:0006807,GO:0006950,GO:0006979,GO:0007154,GO:0007165,GO:0007275,GO:0008033,GO:0008150,GO:0008152,GO:0008283,GO:0008284,GO:0008942,GO:…	ko:K11373
spt_1020314	trihelix transcription factor PTLlike	GO:0003677,GO:0005634,GO:0006355	-
spt_1020315	Retrovirusrelated Pol polyprotein	GO:0003964,GO:0006278,GO:0006979,GO:0016301,GO:0020037,GO:0046872,GO:0098869,GO:0140825	-
spt_1020316	Retrovirusrelated Pol polyprotein	-	-
spt_1020317	Transposon Ty3G GagPol polyprotein	GO:0003964,GO:0006278	-
spt_1020320	LOC117928874	GO:0016020	-
spt_1020321	serinethreonineprotein kinase CTR1	GO:0000160,GO:0000166,GO:0001666,GO:0002215,GO:0003674,GO:0003723,GO:0003824,GO:0004672,GO:0004674,GO:0004712,GO:0005488,GO:0005515,GO:0005524,GO:0005575,GO:0005622,GO:0005623,GO:0005634,GO:0005730,GO:0005737,GO:0005783,GO:0005789,GO:0005886,GO:0006082,GO:0006338,GO:0006464,GO:0006468,GO:0006629,GO:0006720,GO:0006721,GO:0006793,GO:0006796,GO:0006807,GO:0006950,GO:0007154,GO:0007165,GO:0008144,GO:…	ko:K14510
spt_1020323	Retrovirusrelated Pol polyprotein	GO:0000002,GO:0000122,GO:0000166,GO:0001775,GO:0001776,GO:0001932,GO:0001933,GO:0001941,GO:0001959,GO:0001960,GO:0002260,GO:0002376,GO:0002520,GO:0002521,GO:0002682,GO:0002683,GO:0002684,GO:0002694,GO:0002696,GO:0003674,GO:0003720,GO:0005102,GO:0005126,GO:0005133,GO:0005488,GO:0005515,GO:0005524,GO:0005575,GO:0005622,GO:0005623,GO:0005634,GO:0005737,GO:0005739,GO:0005759,GO:0005829,GO:0005856,GO:…	ko:K05337
spt_1020324	VITISV_004338	GO:0003723,GO:0005730,GO:0006596,GO:0008168,GO:0009987,GO:0016020,GO:0032259	-
spt_1020420	nifUlike protein 4	GO:0000166,GO:0003674,GO:0005198,GO:0005488,GO:0005506,GO:0005507,GO:0005524,GO:0005575,GO:0005622,GO:0005623,GO:0005737,GO:0005739,GO:0006790,GO:0008144,GO:0008150,GO:0008152,GO:0009987,GO:0016043,GO:0016226,GO:0017076,GO:0022607,GO:0030554,GO:0031163,GO:0032553,GO:0032555,GO:0032559,GO:0035639,GO:0036094,GO:0043167,GO:0043168,GO:0043169,GO:0043226,GO:0043227,GO:0043229,GO:0043231,GO:0044085,GO:…	ko:K22074
spt_1020421	WD repeatcontaining protein 26like	-	ko:K18577
spt_1020422	cAMPregulated phosphoprotein 21	GO:0003674,GO:0003676,GO:0005488,GO:0005575,GO:0005622,GO:0005623,GO:0005634,GO:0043226,GO:0043227,GO:0043229,GO:0043231,GO:0044424,GO:0044464,GO:0097159,GO:1901363	ko:K02865,ko:K14396
spt_1020469	unnamed	GO:0003674,GO:0003824,GO:0005488,GO:0005575,GO:0005622,GO:0005623,GO:0005737,GO:0006091,GO:0006124,GO:0008150,GO:0008152,GO:0009055,GO:0009507,GO:0009536,GO:0009987,GO:0016020,GO:0016491,GO:0022900,GO:0043167,GO:0043169,GO:0043226,GO:0043227,GO:0043229,GO:0043231,GO:0044237,GO:0044424,GO:0044444,GO:0044464,GO:0046872,GO:0048037,GO:0051536,GO:0051537,GO:0051540,GO:0055114	ko:K02639
spt_1020501	Retrovirusrelated Pol polyprotein	-	-
spt_1020502	At2g38710	GO:0005575,GO:0005622,GO:0005623,GO:0005737,GO:0005829,GO:0006950,GO:0006970,GO:0008150,GO:0009628,GO:0009651,GO:0044424,GO:0044444,GO:0044464,GO:0050896	-
spt_1020506	Retrovirusrelated Pol polyprotein	-	-
spt_1020627	3hydroxyisobutyrylCoA hydrolase 1 isoform X2	GO:0003860,GO:0016787	ko:K05605
spt_1020863	protein LONG AFTER FARRED 3 isoform X2	GO:0003674,GO:0003824,GO:0016787,GO:0016810	-
spt_1021092	basic leucine zipper 23like	GO:0000978,GO:0000981,GO:0003674,GO:0003676,GO:0003677,GO:0003700,GO:0005488,GO:0005515,GO:0005575,GO:0005622,GO:0005623,GO:0005634,GO:0005737,GO:0006139,GO:0006351,GO:0006355,GO:0006357,GO:0006725,GO:0006807,GO:0008150,GO:0008152,GO:0009058,GO:0009059,GO:0009889,GO:0009987,GO:0010467,GO:0010468,GO:0010556,GO:0016020,GO:0016070,GO:0018130,GO:0019219,GO:0019222,GO:0019438,GO:0031323,GO:0031326,GO:…	-
spt_1021093	zinc finger CCCH domaincontaining protein 53 isoform X1	GO:0003674,GO:0003676,GO:0003677,GO:0003723,GO:0003729,GO:0003824,GO:0004518,GO:0005488,GO:0005730,GO:0005829,GO:0006139,GO:0006725,GO:0006807,GO:0008150,GO:0008152,GO:0009735,GO:0009987,GO:0010445,GO:0016020,GO:0016787,GO:0016788,GO:0034641,GO:0043167,GO:0043169,GO:0043170,GO:0044237,GO:0044238,GO:0046483,GO:0046872,GO:0071704,GO:0090304,GO:0090305,GO:0097159,GO:1901360,GO:1901363	-
spt_1021094	calciumtransporting ATPase 11, plasma membranetype	GO:0000166,GO:0000325,GO:0001101,GO:0003674,GO:0003824,GO:0005215,GO:0005388,GO:0005488,GO:0005515,GO:0005516,GO:0005524,GO:0005575,GO:0005622,GO:0005623,GO:0005737,GO:0005773,GO:0005774,GO:0005794,GO:0005886,GO:0005887,GO:0006810,GO:0006811,GO:0006812,GO:0006816,GO:0006950,GO:0006952,GO:0008144,GO:0008150,GO:0008324,GO:0009266,GO:0009409,GO:0009414,GO:0009415,GO:0009507,GO:0009536,GO:0009605,GO:…	ko:K01537
spt_1021888	WD repeatcontaining protein 48 isoform X1	GO:0000323,GO:0000724,GO:0005515,GO:0005575,GO:0005622,GO:0005623,GO:0005634,GO:0005730,GO:0005737,GO:0005764,GO:0005768,GO:0005770,GO:0005773,GO:0006464,GO:0006508,GO:0006807,GO:0008150,GO:0008152,GO:0009987,GO:0010311,GO:0010492,GO:0012505,GO:0016020,GO:0016579,GO:0016905,GO:0019538,GO:0031410,GO:0031982,GO:0036211,GO:0043130,GO:0043170,GO:0043226,GO:0043227,GO:0043229,GO:0043231,GO:0043412,GO:…	ko:K15361
spt_1021890	Transposon Ty3G GagPol polyprotein	GO:0003676,GO:0008270	ko:K15803
spt_1021891	kinesinlike protein KIN14U	GO:0000166,GO:0003008,GO:0003674,GO:0003774,GO:0003777,GO:0003824,GO:0005488,GO:0005515,GO:0005524,GO:0005575,GO:0005622,GO:0005623,GO:0005737,GO:0005794,GO:0005813,GO:0005815,GO:0005856,GO:0005871,GO:0005874,GO:0005875,GO:0005911,GO:0005912,GO:0005913,GO:0005915,GO:0006928,GO:0006996,GO:0007017,GO:0007018,GO:0007030,GO:0007155,GO:0007600,GO:0007601,GO:0008017,GO:0008092,GO:0008144,GO:0008150,GO:…	ko:K10406
spt_1021892	LOC117929584	GO:0008168,GO:0009987,GO:0016020,GO:0032259	-
spt_1021893	LOC100260646	GO:0006614,GO:0008312,GO:0016020,GO:0048500	-
spt_1021894	putative	GO:0008080,GO:0016747	-
spt_1022017	phosphoinositide phosphatase SAC1	GO:0000139,GO:0000902,GO:0003674,GO:0003824,GO:0004438,GO:0005575,GO:0005622,GO:0005623,GO:0005737,GO:0005768,GO:0005769,GO:0005770,GO:0005773,GO:0005774,GO:0005783,GO:0005794,GO:0005811,GO:0006629,GO:0006644,GO:0006650,GO:0006661,GO:0006793,GO:0006796,GO:0006996,GO:0007010,GO:0007033,GO:0007272,GO:0007275,GO:0007399,GO:0007610,GO:0007626,GO:0008150,GO:0008152,GO:0008366,GO:0008610,GO:0008654,GO:…	-
spt_1022029	probable WRKY transcription factor 74	GO:0003674,GO:0003676,GO:0003677,GO:0003700,GO:0005488,GO:0005515,GO:0005516,GO:0005575,GO:0005622,GO:0005623,GO:0005634,GO:0006139,GO:0006351,GO:0006355,GO:0006725,GO:0006807,GO:0008150,GO:0008152,GO:0009058,GO:0009059,GO:0009889,GO:0009987,GO:0010467,GO:0010468,GO:0010556,GO:0016070,GO:0018130,GO:0019219,GO:0019222,GO:0019438,GO:0031323,GO:0031326,GO:0032774,GO:0034641,GO:0034645,GO:0034654,GO:…	-
spt_1022030	LOC100244447	-	-
spt_1022215	LOC100258393 isoform X1	GO:0016020	-
spt_1022770	ethyleneresponsive transcription factor ERF113	GO:0003677,GO:0003700,GO:0005634,GO:0006355,GO:0006952,GO:0009873,GO:0042631	-
spt_1022771	Nalphaacetyltransferase MAK3	GO:0003674,GO:0003824,GO:0004596,GO:0005575,GO:0005622,GO:0005623,GO:0005737,GO:0006464,GO:0006473,GO:0006474,GO:0006807,GO:0008080,GO:0008150,GO:0008152,GO:0009987,GO:0010467,GO:0016020,GO:0016407,GO:0016410,GO:0016740,GO:0016746,GO:0016747,GO:0019538,GO:0031248,GO:0031365,GO:0031414,GO:0031417,GO:0032991,GO:0034212,GO:0036211,GO:0043170,GO:0043412,GO:0043543,GO:0044237,GO:0044238,GO:0044260,GO:…	ko:K00670
spt_1022772	LOC117930061	GO:0016020	-
spt_1022774	LOC117930161	GO:0005681,GO:0005737,GO:0006397,GO:0008380	-
spt_1022775	alphamannosidase At3g26720like	GO:0000323,GO:0003008,GO:0003674,GO:0003676,GO:0003824,GO:0004553,GO:0004559,GO:0005488,GO:0005575,GO:0005618,GO:0005622,GO:0005623,GO:0005737,GO:0005764,GO:0005773,GO:0005774,GO:0005975,GO:0005996,GO:0006013,GO:0006464,GO:0006517,GO:0006807,GO:0007610,GO:0007611,GO:0008150,GO:0008152,GO:0009100,GO:0009505,GO:0009987,GO:0015923,GO:0016020,GO:0016787,GO:0016798,GO:0019318,GO:0019538,GO:0030246,GO:…	ko:K01191
spt_1022776	probable alphamannosidase At5g13980 isoform X3	GO:0000323,GO:0001775,GO:0002252,GO:0002263,GO:0002274,GO:0002275,GO:0002283,GO:0002366,GO:0002376,GO:0002443,GO:0002444,GO:0002446,GO:0003674,GO:0003824,GO:0004553,GO:0004559,GO:0005488,GO:0005575,GO:0005576,GO:0005615,GO:0005618,GO:0005622,GO:0005623,GO:0005737,GO:0005764,GO:0005766,GO:0005773,GO:0005774,GO:0005775,GO:0005975,GO:0005996,GO:0006013,GO:0006464,GO:0006517,GO:0006807,GO:0006810,GO:…	ko:K01191
spt_1022904	protoporphyrinogen oxidase	GO:0000003,GO:0003006,GO:0003674,GO:0003824,GO:0004729,GO:0005575,GO:0005622,GO:0005623,GO:0005737,GO:0005739,GO:0005740,GO:0005743,GO:0006725,GO:0006778,GO:0006779,GO:0006782,GO:0006783,GO:0006807,GO:0007275,GO:0008150,GO:0008152,GO:0009058,GO:0009507,GO:0009526,GO:0009528,GO:0009534,GO:0009536,GO:0009706,GO:0009790,GO:0009791,GO:0009793,GO:0009941,GO:0009987,GO:0010154,GO:0010228,GO:0015994,GO:…	ko:K00231
spt_1022905	VITISV_018267	GO:0000278,GO:0000281,GO:0000323,GO:0000902,GO:0000904,GO:0000910,GO:0001508,GO:0002028,GO:0003008,GO:0003254,GO:0003674,GO:0005198,GO:0005200,GO:0005488,GO:0005515,GO:0005516,GO:0005575,GO:0005622,GO:0005623,GO:0005634,GO:0005737,GO:0005764,GO:0005773,GO:0005783,GO:0005794,GO:0005829,GO:0005856,GO:0005886,GO:0005911,GO:0006810,GO:0006888,GO:0006892,GO:0006893,GO:0006996,GO:0007009,GO:0007010,GO:…	-
spt_1022906	ribosomerecycling factor	GO:0005575,GO:0005622,GO:0005623,GO:0005737,GO:0005739,GO:0006412,GO:0006518,GO:0006807,GO:0008150,GO:0008152,GO:0009058,GO:0009059,GO:0009987,GO:0010467,GO:0016301,GO:0019538,GO:0034641,GO:0034645,GO:0043023,GO:0043043,GO:0043170,GO:0043603,GO:0043604,GO:0044237,GO:0044238,GO:0044249,GO:0044260,GO:0044267,GO:0044271,GO:0044424,GO:0044464,GO:0071704,GO:1901564,GO:1901566,GO:1901576	ko:K02838
spt_1022907	transcription termination factor MTERF5, chloroplastic	GO:0000315,GO:0001101,GO:0003674,GO:0003676,GO:0003677,GO:0003690,GO:0003723,GO:0003727,GO:0003729,GO:0003735,GO:0005488,GO:0005575,GO:0005622,GO:0005623,GO:0005737,GO:0006139,GO:0006351,GO:0006353,GO:0006355,GO:0006396,GO:0006412,GO:0006725,GO:0006807,GO:0006950,GO:0006970,GO:0006996,GO:0008150,GO:0008152,GO:0008380,GO:0009058,GO:0009059,GO:0009507,GO:0009536,GO:0009628,GO:0009651,GO:0009657,GO:…	ko:K15032
spt_1022910	LINE1 retrotransposable element ORF2 protein	GO:0003964,GO:0006278	-
spt_1022911	LINE1 retrotransposable element ORF2 protein	GO:0000003,GO:0000166,GO:0000184,GO:0000288,GO:0000291,GO:0000956,GO:0003002,GO:0003006,GO:0003674,GO:0003676,GO:0003723,GO:0003724,GO:0003824,GO:0003964,GO:0004004,GO:0004386,GO:0005488,GO:0005524,GO:0005575,GO:0005622,GO:0005623,GO:0005634,GO:0005654,GO:0005737,GO:0005829,GO:0006139,GO:0006278,GO:0006396,GO:0006397,GO:0006401,GO:0006402,GO:0006725,GO:0006807,GO:0007275,GO:0007389,GO:0008026,GO:…	ko:K12598
spt_1022912	CK203_108033	-	-
spt_1022913	sister chromatid cohesion 1 protein 2 isoform X1	GO:0000228,GO:0000278,GO:0000793,GO:0000794,GO:0000798,GO:0000819,GO:0003674,GO:0003682,GO:0003735,GO:0005488,GO:0005515,GO:0005575,GO:0005622,GO:0005623,GO:0005634,GO:0005694,GO:0005840,GO:0006139,GO:0006259,GO:0006281,GO:0006302,GO:0006412,GO:0006725,GO:0006807,GO:0006950,GO:0006974,GO:0006996,GO:0007049,GO:0007059,GO:0007062,GO:0008150,GO:0008152,GO:0008278,GO:0009987,GO:0016043,GO:0022402,GO:…	ko:K06670
spt_1022914	50S ribosomal protein L13	GO:0003674,GO:0003729,GO:0003735,GO:0005198,GO:0005575,GO:0005622,GO:0005623,GO:0005737,GO:0005743,GO:0005762,GO:0005840,GO:0006412,GO:0006518,GO:0006807,GO:0006850,GO:0008150,GO:0008152,GO:0009058,GO:0009059,GO:0009987,GO:0010467,GO:0017148,GO:0019538,GO:0032991,GO:0034641,GO:0034645,GO:0043043,GO:0043170,GO:0043226,GO:0043228,GO:0043229,GO:0043232,GO:0043603,GO:0043604,GO:0044237,GO:0044238,GO:…	ko:K02871
spt_1022915	phosducinlike protein 3	GO:0005737,GO:0006457	-
spt_1023000	LOC100259460	GO:0001522,GO:0003674,GO:0003676,GO:0003723,GO:0003824,GO:0005488,GO:0005634,GO:0006139,GO:0006396,GO:0006399,GO:0006400,GO:0006725,GO:0006807,GO:0008033,GO:0008150,GO:0008152,GO:0009451,GO:0009982,GO:0009987,GO:0010467,GO:0016070,GO:0016301,GO:0016853,GO:0016866,GO:0034470,GO:0034641,GO:0034660,GO:0043170,GO:0043412,GO:0044237,GO:0044238,GO:0046483,GO:0071704,GO:0090304,GO:0097159,GO:1901360,GO:…	ko:K03177
spt_1023001	LOC100242256	-	-
spt_1023002	glucuronokinase 1	GO:0000003,GO:0000166,GO:0003006,GO:0003674,GO:0003676,GO:0003723,GO:0003727,GO:0003824,GO:0004496,GO:0005488,GO:0005524,GO:0005575,GO:0005622,GO:0005623,GO:0005737,GO:0005829,GO:0005975,GO:0006020,GO:0006066,GO:0006793,GO:0006796,GO:0008144,GO:0008150,GO:0008152,GO:0008187,GO:0008266,GO:0009856,GO:0009987,GO:0016301,GO:0016310,GO:0016740,GO:0016772,GO:0016773,GO:0017076,GO:0019287,GO:0019751,GO:…	ko:K16190
spt_1023003	LOC100259362 isoform X1	GO:0000139,GO:0003674,GO:0003824,GO:0003830,GO:0005575,GO:0005622,GO:0005623,GO:0005737,GO:0005794,GO:0006044,GO:0006464,GO:0006486,GO:0006487,GO:0006807,GO:0008150,GO:0008152,GO:0008194,GO:0008375,GO:0009058,GO:0009059,GO:0009100,GO:0009101,GO:0009987,GO:0012505,GO:0016020,GO:0016021,GO:0016740,GO:0016757,GO:0016758,GO:0019538,GO:0031090,GO:0031224,GO:0031984,GO:0034645,GO:0036211,GO:0043170,GO:…	ko:K00737
spt_1023004	uncharacterized CRM domaincontaining protein At3g25440, chloroplastic	GO:0000075,GO:0000077,GO:0003674,GO:0003676,GO:0003677,GO:0003700,GO:0003723,GO:0005488,GO:0005575,GO:0005622,GO:0005623,GO:0005634,GO:0006139,GO:0006351,GO:0006355,GO:0006725,GO:0006807,GO:0006950,GO:0006974,GO:0008150,GO:0008152,GO:0009058,GO:0009059,GO:0009314,GO:0009628,GO:0009889,GO:0009987,GO:0010212,GO:0010332,GO:0010467,GO:0010468,GO:0010556,GO:0010564,GO:0016070,GO:0018130,GO:0019219,GO:…	-
spt_1023006	SUPPRESSOR OF GAMMA RESPONSE 1 isoform X3	GO:0000075,GO:0000077,GO:0000976,GO:0003674,GO:0003676,GO:0003677,GO:0003700,GO:0004672,GO:0005488,GO:0005524,GO:0005575,GO:0005622,GO:0005623,GO:0005634,GO:0005886,GO:0006139,GO:0006351,GO:0006355,GO:0006725,GO:0006807,GO:0006950,GO:0006974,GO:0008150,GO:0008152,GO:0009058,GO:0009059,GO:0009314,GO:0009628,GO:0009793,GO:0009889,GO:0009987,GO:0010212,GO:0010332,GO:0010467,GO:0010468,GO:0010556,GO:…	-
spt_1023007	serinethreonineprotein kinase HT1	GO:0002215,GO:0004672,GO:0004674,GO:0004712,GO:0005515,GO:0005524,GO:0005634,GO:0005730,GO:0005737,GO:0005886,GO:0006338,GO:0006468,GO:0007165,GO:0016301,GO:0045177,GO:0046872,GO:0048226,GO:0140995,GO:0140996,GO:0140997,GO:0140998,GO:0141003	-
spt_1023159	AAAATPase ASD	GO:0005524,GO:0005694,GO:0005739,GO:0005886,GO:0006950,GO:0009507,GO:0016887	ko:K08900
spt_1023620	Transposon TX1 uncharacterized 149 kDa protein	-	-
spt_1023808	LOW QUALITY PROTEIN: eukaryotic translation initiation factor 4Glike	GO:0001101,GO:0003674,GO:0003676,GO:0003723,GO:0003729,GO:0003743,GO:0005488,GO:0005515,GO:0005575,GO:0005622,GO:0005623,GO:0005634,GO:0005737,GO:0005829,GO:0006412,GO:0006413,GO:0006417,GO:0006518,GO:0006807,GO:0008135,GO:0008150,GO:0008152,GO:0009058,GO:0009059,GO:0009605,GO:0009607,GO:0009615,GO:0009719,GO:0009725,GO:0009737,GO:0009889,GO:0009987,GO:0010033,GO:0010467,GO:0010468,GO:0010556,GO:…	ko:K03260
spt_1023809	-	GO:0005777,GO:0008670,GO:0009062	ko:K13237
spt_1023810	metacaspase1	GO:0003674,GO:0003824,GO:0004175,GO:0004197,GO:0005737,GO:0006508,GO:0006807,GO:0006950,GO:0006952,GO:0008150,GO:0008152,GO:0008233,GO:0008234,GO:0009987,GO:0010941,GO:0010942,GO:0016787,GO:0019538,GO:0043067,GO:0043068,GO:0043170,GO:0044238,GO:0048518,GO:0048522,GO:0050789,GO:0050794,GO:0050896,GO:0065007,GO:0070011,GO:0071704,GO:0140096,GO:1901564	-
spt_1023811	Retrovirusrelated Pol polyprotein	GO:0003676,GO:0004190,GO:0009987,GO:0015074	-
spt_1023819	cytochrome P450 714C2like	GO:0004497,GO:0005506,GO:0016020,GO:0016114,GO:0016705,GO:0020037,GO:0033075	ko:K20661
spt_1023820	cytochrome P450 714C2like	GO:0000166,GO:0003676,GO:0004497,GO:0005506,GO:0006629,GO:0009987,GO:0016020,GO:0016705,GO:0020037,GO:0033075	ko:K20661
spt_1023879	ranBP2type zinc finger protein At1g67325 isoform X1	GO:0003729,GO:0046872	-
spt_1023880	plasma membrane ATPase 1	GO:0000166,GO:0003674,GO:0003824,GO:0005215,GO:0005488,GO:0005524,GO:0005575,GO:0005623,GO:0005886,GO:0006810,GO:0006811,GO:0006812,GO:0008144,GO:0008150,GO:0008324,GO:0008553,GO:0015075,GO:0015077,GO:0015078,GO:0015318,GO:0015399,GO:0015405,GO:0015662,GO:0015672,GO:0016020,GO:0016021,GO:0016462,GO:0016787,GO:0016817,GO:0016818,GO:0016887,GO:0017076,GO:0017111,GO:0019829,GO:0022804,GO:0022853,GO:…	ko:K01535
spt_1023881	Pentatricopeptide repeatcontaining protein	GO:0003674,GO:0003676,GO:0003723,GO:0003727,GO:0003735,GO:0003824,GO:0004518,GO:0004519,GO:0005488,GO:0005515,GO:0005575,GO:0005622,GO:0005623,GO:0005739,GO:0005783,GO:0006139,GO:0006725,GO:0006807,GO:0008150,GO:0008152,GO:0009451,GO:0009507,GO:0009793,GO:0009987,GO:0016070,GO:0016554,GO:0016787,GO:0016788,GO:0022626,GO:0034641,GO:0043170,GO:0043226,GO:0043227,GO:0043229,GO:0043231,GO:0043412,GO:…	-
spt_1023882	LOC117932425	GO:0003746,GO:0006414,GO:0016301	-
spt_1023883	homeobox protein knotted1like 6	GO:0003674,GO:0003676,GO:0003677,GO:0003700,GO:0005488,GO:0005575,GO:0005622,GO:0005623,GO:0005634,GO:0006355,GO:0008150,GO:0009888,GO:0009889,GO:0010073,GO:0010468,GO:0010556,GO:0019219,GO:0019222,GO:0031323,GO:0031326,GO:0032501,GO:0032502,GO:0043226,GO:0043227,GO:0043229,GO:0043231,GO:0043565,GO:0044424,GO:0044464,GO:0048507,GO:0048856,GO:0050789,GO:0050794,GO:0051171,GO:0051252,GO:0060255,GO:…	-
spt_1023884	palmitoylprotein thioesterase 1	GO:0000003,GO:0000323,GO:0002084,GO:0003674,GO:0003824,GO:0005575,GO:0005622,GO:0005623,GO:0005737,GO:0005764,GO:0005773,GO:0006464,GO:0006807,GO:0006810,GO:0006897,GO:0006898,GO:0006996,GO:0007005,GO:0007275,GO:0007610,GO:0008150,GO:0008152,GO:0008474,GO:0009056,GO:0009057,GO:0009791,GO:0009987,GO:0016020,GO:0016043,GO:0016192,GO:0016787,GO:0016788,GO:0016790,GO:0018991,GO:0019098,GO:0019538,GO:…	ko:K01074
spt_1024007	-	GO:0000166,GO:0003674,GO:0003824,GO:0004175,GO:0004176,GO:0004222,GO:0005488,GO:0005515,GO:0005524,GO:0005575,GO:0005622,GO:0005623,GO:0005737,GO:0005739,GO:0005740,GO:0005743,GO:0005886,GO:0006457,GO:0006508,GO:0006515,GO:0006605,GO:0006626,GO:0006807,GO:0006810,GO:0006839,GO:0006886,GO:0006996,GO:0007005,GO:0008104,GO:0008144,GO:0008150,GO:0008152,GO:0008233,GO:0008237,GO:0008270,GO:0009056,GO:…	ko:K08955
spt_1024008	VITISV_009135	-	-
spt_1024010	VITISV_018223	-	-
spt_1024011	SPX domaincontaining protein 3	GO:0005575,GO:0005622,GO:0005623,GO:0005737,GO:0005739,GO:0005783,GO:0006950,GO:0007154,GO:0008150,GO:0009267,GO:0009605,GO:0009987,GO:0009991,GO:0010646,GO:0010647,GO:0012505,GO:0016036,GO:0031667,GO:0031668,GO:0031669,GO:0032101,GO:0032103,GO:0032104,GO:0032106,GO:0032107,GO:0032109,GO:0033554,GO:0042594,GO:0043226,GO:0043227,GO:0043229,GO:0043231,GO:0044424,GO:0044444,GO:0044464,GO:0048518,GO:…	-
spt_1024069	kinesinlike protein KINUB	GO:0000166,GO:0003674,GO:0003774,GO:0003777,GO:0003824,GO:0004842,GO:0005488,GO:0005515,GO:0005524,GO:0005575,GO:0005622,GO:0005623,GO:0005737,GO:0005829,GO:0005856,GO:0005871,GO:0005874,GO:0005875,GO:0005876,GO:0006928,GO:0007017,GO:0007018,GO:0007275,GO:0008017,GO:0008092,GO:0008144,GO:0008150,GO:0008574,GO:0009987,GO:0015630,GO:0015631,GO:0016462,GO:0016787,GO:0016817,GO:0016818,GO:0016887,GO:…	ko:K10396
spt_1024070	AThook motif nuclearlocalized protein 22	GO:0000003,GO:0003006,GO:0003674,GO:0003676,GO:0003677,GO:0003680,GO:0003690,GO:0003700,GO:0005488,GO:0005515,GO:0005575,GO:0005622,GO:0005623,GO:0005634,GO:0006139,GO:0006351,GO:0006355,GO:0006725,GO:0006807,GO:0007275,GO:0008150,GO:0008152,GO:0009058,GO:0009059,GO:0009314,GO:0009416,GO:0009628,GO:0009639,GO:0009640,GO:0009642,GO:0009646,GO:0009647,GO:0009791,GO:0009889,GO:0009908,GO:0009987,GO:…	-
spt_1024071	probable calciumbinding protein CML23	GO:0003674,GO:0003677,GO:0005488,GO:0005509,GO:0005515,GO:0005575,GO:0005622,GO:0005623,GO:0005634,GO:0005737,GO:0005886,GO:0006950,GO:0007275,GO:0008150,GO:0009266,GO:0009409,GO:0009628,GO:0009653,GO:0009888,GO:0009987,GO:0010015,GO:0010053,GO:0010054,GO:0016020,GO:0016049,GO:0021700,GO:0022622,GO:0030154,GO:0032501,GO:0032502,GO:0040007,GO:0042802,GO:0043167,GO:0043169,GO:0043226,GO:0043227,GO:…	ko:K13448
spt_1024072	brefeldin Ainhibited guanine nucleotideexchange protein 2	GO:0000139,GO:0001817,GO:0001819,GO:0001881,GO:0003674,GO:0005085,GO:0005086,GO:0005102,GO:0005488,GO:0005509,GO:0005515,GO:0005575,GO:0005622,GO:0005623,GO:0005634,GO:0005737,GO:0005768,GO:0005794,GO:0005802,GO:0005815,GO:0005829,GO:0005856,GO:0005874,GO:0005879,GO:0005881,GO:0005929,GO:0005930,GO:0006810,GO:0006887,GO:0006892,GO:0006893,GO:0006996,GO:0007032,GO:0007154,GO:0007165,GO:0007275,GO:…	ko:K18442
spt_1024073	Copia protein	GO:0003674,GO:0003676,GO:0003700,GO:0003824,GO:0003964,GO:0004175,GO:0004190,GO:0004518,GO:0004519,GO:0004565,GO:0005488,GO:0005975,GO:0006139,GO:0006259,GO:0006278,GO:0006355,GO:0006508,GO:0006725,GO:0006807,GO:0008150,GO:0008152,GO:0008233,GO:0008270,GO:0009058,GO:0009059,GO:0009987,GO:0015074,GO:0016602,GO:0016740,GO:0016772,GO:0016779,GO:0016787,GO:0016788,GO:0018130,GO:0019438,GO:0019538,GO:…	ko:K08874
spt_1024074	pentatricopeptide repeatcontaining protein At1g01970	GO:0003674,GO:0003676,GO:0003723,GO:0003727,GO:0003735,GO:0003824,GO:0004518,GO:0004519,GO:0005488,GO:0005515,GO:0005575,GO:0005622,GO:0005623,GO:0005739,GO:0005783,GO:0006139,GO:0006725,GO:0006807,GO:0008150,GO:0008152,GO:0009451,GO:0009507,GO:0009793,GO:0009987,GO:0016070,GO:0016554,GO:0016787,GO:0016788,GO:0022626,GO:0034641,GO:0043170,GO:0043226,GO:0043227,GO:0043229,GO:0043231,GO:0043412,GO:…	-
spt_1024075	LOB domaincontaining protein 18	GO:0005575,GO:0005622,GO:0005623,GO:0005634,GO:0006355,GO:0007275,GO:0008150,GO:0009653,GO:0009755,GO:0009791,GO:0009888,GO:0009889,GO:0009891,GO:0009893,GO:0010015,GO:0010087,GO:0010089,GO:0010101,GO:0010102,GO:0010311,GO:0010468,GO:0010556,GO:0010557,GO:0010604,GO:0010628,GO:0019219,GO:0019222,GO:0022622,GO:0031323,GO:0031325,GO:0031326,GO:0031328,GO:0032501,GO:0032502,GO:0043226,GO:0043227,GO:…	ko:K21994
spt_1024076	LOB domaincontaining protein 19	GO:0005634,GO:0009755,GO:0045893	ko:K21994
spt_1024077	LOC100254100	-	-
spt_1024078	unnamed	-	-
spt_1024502	LOC100258452	-	-
spt_1024503	LOW QUALITY PROTEIN: LOC100263595	GO:0008168,GO:0009987,GO:0012505,GO:0016020,GO:0032259	-
spt_1024504	RINGH2 finger protein ATL68like	GO:0003674,GO:0003824,GO:0004842,GO:0005488,GO:0005575,GO:0006464,GO:0006508,GO:0006511,GO:0006807,GO:0008150,GO:0008152,GO:0008270,GO:0009056,GO:0009057,GO:0009987,GO:0010498,GO:0016020,GO:0016021,GO:0016567,GO:0016740,GO:0019538,GO:0019787,GO:0019941,GO:0030163,GO:0031224,GO:0032446,GO:0036211,GO:0043161,GO:0043167,GO:0043169,GO:0043170,GO:0043412,GO:0043632,GO:0044237,GO:0044238,GO:0044248,GO:…	ko:K19041
spt_1024505	late embryogenesis abundant protein At1g64065	GO:0009269,GO:0016020,GO:0098542	-
spt_1024506	LOC104881919 isoform X1	-	-
spt_1024507	desiccation protectant protein Lea14 homolog	GO:0005829,GO:0009269,GO:0016020	-
spt_1024508	unnamed	GO:0042819	-
spt_1024509	desiccation protectant protein Lea14 homolog	GO:0005829,GO:0009269,GO:0016020	-
spt_1024510	late embryogenesis abundant protein Lea14A	GO:0005829,GO:0009269,GO:0016020	-
spt_1024511	E4 SUMOprotein ligase PIAL2 isoform X1	GO:0000785,GO:0008270,GO:0009987,GO:0016925,GO:0061665	ko:K04706,ko:K17427
spt_1024512	E4 SUMOprotein ligase PIAL2 isoform X2	-	ko:K04706,ko:K17427
spt_1024513	-	GO:0000785	ko:K04706,ko:K17427
spt_1024514	VITISV_006167	GO:0003735,GO:0005762	ko:K17427
spt_1024515	probable WRKY transcription factor 24	GO:0003674,GO:0003676,GO:0003677,GO:0003700,GO:0005488,GO:0005515,GO:0005575,GO:0005622,GO:0005623,GO:0005634,GO:0006139,GO:0006351,GO:0006355,GO:0006725,GO:0006807,GO:0008150,GO:0008152,GO:0009058,GO:0009059,GO:0009889,GO:0009987,GO:0010467,GO:0010468,GO:0010556,GO:0016070,GO:0018130,GO:0019219,GO:0019222,GO:0019438,GO:0031323,GO:0031326,GO:0032774,GO:0034641,GO:0034645,GO:0034654,GO:0043170,GO:…	-
spt_1025757	trafficking protein particle complex subunit 1 isoform X1	GO:0003674,GO:0005085,GO:0005088,GO:0005488,GO:0005515,GO:0005575,GO:0005622,GO:0005623,GO:0005737,GO:0005783,GO:0005794,GO:0006810,GO:0006888,GO:0008150,GO:0012505,GO:0016192,GO:0017016,GO:0017112,GO:0017137,GO:0019899,GO:0030008,GO:0031267,GO:0032991,GO:0043226,GO:0043227,GO:0043229,GO:0043231,GO:0044424,GO:0044444,GO:0044464,GO:0046907,GO:0048193,GO:0051020,GO:0051179,GO:0051234,GO:0051641,GO:…	ko:K20300
spt_1025758	trafficking protein particle complex subunit 1 isoform X1	GO:0003674,GO:0005085,GO:0005088,GO:0005488,GO:0005515,GO:0005575,GO:0005622,GO:0005623,GO:0005737,GO:0005783,GO:0005794,GO:0006810,GO:0006888,GO:0008150,GO:0012505,GO:0016192,GO:0017016,GO:0017112,GO:0017137,GO:0019899,GO:0030008,GO:0031267,GO:0032991,GO:0043226,GO:0043227,GO:0043229,GO:0043231,GO:0044424,GO:0044444,GO:0044464,GO:0046907,GO:0048193,GO:0051020,GO:0051179,GO:0051234,GO:0051641,GO:…	ko:K20300
spt_1025759	trafficking protein particle complex subunit 1 isoform X1	GO:0003674,GO:0005085,GO:0005088,GO:0005488,GO:0005515,GO:0005575,GO:0005622,GO:0005623,GO:0005737,GO:0005783,GO:0005794,GO:0006810,GO:0006888,GO:0008150,GO:0009555,GO:0009933,GO:0012505,GO:0016192,GO:0017016,GO:0017112,GO:0017137,GO:0019899,GO:0030008,GO:0031267,GO:0032991,GO:0043226,GO:0043227,GO:0043229,GO:0043231,GO:0044424,GO:0044444,GO:0044464,GO:0046907,GO:0048193,GO:0051020,GO:0051179,GO:…	ko:K20300
spt_1026293	VITISV_016316	-	-
spt_1026294	protein BASIC PENTACYSTEINE1like	GO:0000786,GO:0003674,GO:0003676,GO:0003677,GO:0003700,GO:0005488,GO:0005575,GO:0005622,GO:0005623,GO:0005634,GO:0006139,GO:0006334,GO:0006351,GO:0006355,GO:0006725,GO:0006807,GO:0008150,GO:0008152,GO:0009058,GO:0009059,GO:0009719,GO:0009723,GO:0009725,GO:0009889,GO:0009987,GO:0010033,GO:0010467,GO:0010468,GO:0010556,GO:0016020,GO:0016070,GO:0018130,GO:0019219,GO:0019222,GO:0019438,GO:0030527,GO:…	-
spt_1026295	zinc finger protein SHOOT GRAVITROPISM 5like	GO:0003677,GO:0003700,GO:0004565,GO:0005634,GO:0006355,GO:0009630	-
spt_1026296	Transcription factor MYB52	GO:0000978,GO:0000981,GO:0000988,GO:0000989,GO:0001067,GO:0001076,GO:0001101,GO:0001134,GO:0001135,GO:0003674,GO:0003676,GO:0003677,GO:0003700,GO:0005488,GO:0005575,GO:0005622,GO:0005623,GO:0005634,GO:0006139,GO:0006351,GO:0006355,GO:0006357,GO:0006725,GO:0006807,GO:0006950,GO:0006952,GO:0006970,GO:0007154,GO:0007165,GO:0008150,GO:0008152,GO:0009058,GO:0009059,GO:0009414,GO:0009415,GO:0009605,GO:…	ko:K09422
spt_1026297	glutamine synthetase cytosolic isozyme 1	GO:0000166,GO:0003674,GO:0003824,GO:0004356,GO:0005488,GO:0005507,GO:0005515,GO:0005524,GO:0005575,GO:0005618,GO:0005622,GO:0005623,GO:0005737,GO:0005829,GO:0005840,GO:0005886,GO:0005911,GO:0006082,GO:0006520,GO:0006541,GO:0006542,GO:0006807,GO:0007275,GO:0007568,GO:0008144,GO:0008150,GO:0008152,GO:0008652,GO:0009058,GO:0009064,GO:0009084,GO:0009506,GO:0009987,GO:0010150,GO:0016020,GO:0016053,GO:…	ko:K01915
spt_1026625	Retrovirusrelated Pol polyprotein	GO:0003676,GO:0003964,GO:0006278	-
spt_1026626	VITISV_013138	GO:0003676,GO:0003779,GO:0004190,GO:0008270,GO:0015074,GO:0015629,GO:0030042	-
spt_1026627	LOC117905082	GO:0003674,GO:0003676,GO:0003723,GO:0005488,GO:0005515,GO:0007275,GO:0008150,GO:0032501,GO:0032502,GO:0048856,GO:0097159,GO:1901363	-
spt_1026629	LOC117904988	GO:0009786	-
spt_1026631	protein MICROTUBULE BINDING PROTEIN 2C	GO:0000226,GO:0001101,GO:0002230,GO:0002252,GO:0002376,GO:0002682,GO:0002697,GO:0002831,GO:0003002,GO:0003674,GO:0003676,GO:0003723,GO:0005488,GO:0005575,GO:0005622,GO:0005623,GO:0005737,GO:0005856,GO:0006810,GO:0006950,GO:0006952,GO:0006996,GO:0007010,GO:0007017,GO:0007275,GO:0007389,GO:0008017,GO:0008150,GO:0009414,GO:0009415,GO:0009605,GO:0009607,GO:0009615,GO:0009628,GO:0009987,GO:0010035,GO:…	-
spt_1026632	protein BREAKING OF ASYMMETRY IN THE STOMATAL LINEAGE	GO:0000902,GO:0005575,GO:0005622,GO:0005623,GO:0005634,GO:0005737,GO:0005886,GO:0005938,GO:0007049,GO:0007275,GO:0008150,GO:0008356,GO:0009653,GO:0009786,GO:0009791,GO:0009826,GO:0009888,GO:0009987,GO:0010374,GO:0016020,GO:0016043,GO:0016049,GO:0019897,GO:0019898,GO:0032501,GO:0032502,GO:0032989,GO:0040007,GO:0043226,GO:0043227,GO:0043229,GO:0043231,GO:0044424,GO:0044425,GO:0044444,GO:0044459,GO:…	-
spt_1026633	DaminoacyltRNA deacylase	GO:0009699,GO:0009987,GO:0016874,GO:0048046	-
spt_1026634	DaminoacyltRNA deacylase	GO:0016788,GO:0051499	ko:K09716
spt_1026635	ribonuclease H protein	GO:0003723,GO:0005634,GO:0016020	ko:K22184
spt_1026681	protein LONGIFOLIA 1	GO:0051513	-
spt_1026682	transcription factor TCP5like	GO:0003700,GO:0005634,GO:0006355,GO:0043565	-
spt_1026683	LOC117904782	-	-
spt_1026709	zinc finger protein BRUTUSlike At1g18910 isoform X1	GO:0003674,GO:0003824,GO:0004839,GO:0004842,GO:0005488,GO:0005575,GO:0005622,GO:0005623,GO:0005634,GO:0006464,GO:0006508,GO:0006511,GO:0006807,GO:0006873,GO:0006875,GO:0006879,GO:0006950,GO:0007154,GO:0008150,GO:0008152,GO:0008270,GO:0009056,GO:0009057,GO:0009267,GO:0009605,GO:0009987,GO:0009991,GO:0010106,GO:0010498,GO:0016020,GO:0016021,GO:0016567,GO:0016740,GO:0016874,GO:0019538,GO:0019725,GO:…	ko:K16276
spt_1026710	LOB domaincontaining protein 27like	GO:0000003,GO:0003006,GO:0005575,GO:0005622,GO:0005623,GO:0005634,GO:0007049,GO:0007275,GO:0008150,GO:0009555,GO:0009556,GO:0009786,GO:0009987,GO:0016020,GO:0019953,GO:0022402,GO:0022414,GO:0032501,GO:0032502,GO:0034293,GO:0043226,GO:0043227,GO:0043229,GO:0043231,GO:0043934,GO:0044424,GO:0044464,GO:0044703,GO:0048229,GO:0048236,GO:0048856,GO:0048869,GO:0050789,GO:0050794,GO:0051302,GO:0051321,GO:…	-
spt_1026711	LOC100256959 isoform X1	GO:0003674,GO:0003824,GO:0004843,GO:0005515,GO:0006464,GO:0006508,GO:0006807,GO:0008150,GO:0008152,GO:0008233,GO:0008234,GO:0009987,GO:0016020,GO:0016579,GO:0016787,GO:0019538,GO:0019783,GO:0036211,GO:0036459,GO:0043170,GO:0043412,GO:0044237,GO:0044238,GO:0044260,GO:0044267,GO:004843,GO:0070011,GO:0070646,GO:0070647,GO:0071704,GO:0101005,GO:0140096,GO:1901564	-
spt_1026712	Pentatricopeptide repeatcontaining protein	GO:0003674,GO:0003676,GO:0003723,GO:0003727,GO:0003729,GO:0003735,GO:0003824,GO:0004518,GO:0004519,GO:0005488,GO:0005515,GO:0005575,GO:0005622,GO:0005623,GO:0005737,GO:0005739,GO:0005783,GO:0006139,GO:0006397,GO:0006725,GO:0006807,GO:0008150,GO:0008152,GO:0009451,GO:0009507,GO:0009793,GO:0009987,GO:0016070,GO:0016554,GO:0016787,GO:0016788,GO:0022626,GO:0034641,GO:0043170,GO:0043226,GO:0043227,GO:…	-
spt_1026763	-	GO:0046983	-
spt_1026764	transcription factor TCP15	GO:0000003,GO:0001101,GO:0003006,GO:0003674,GO:0003676,GO:0003677,GO:0003700,GO:0005488,GO:0005575,GO:0005622,GO:0005623,GO:0005634,GO:0006139,GO:0006351,GO:0006355,GO:0006725,GO:0006807,GO:0007275,GO:0008150,GO:0008152,GO:0008283,GO:0009058,GO:0009059,GO:0009719,GO:0009725,GO:0009735,GO:0009737,GO:0009739,GO:0009791,GO:0009889,GO:0009987,GO:0010029,GO:0010033,GO:0010229,GO:0010467,GO:0010468,GO:…	-
spt_1026765	NAP1related protein 2	GO:0000724,GO:0000725,GO:0000785,GO:0003674,GO:0003682,GO:0005488,GO:0005515,GO:0005575,GO:0005622,GO:0005623,GO:0005634,GO:0005737,GO:0005829,GO:0006139,GO:0006259,GO:0006281,GO:0006302,GO:0006310,GO:0006323,GO:0006325,GO:0006333,GO:0006334,GO:0006725,GO:0006807,GO:0006950,GO:0006974,GO:0006996,GO:0008150,GO:0008152,GO:0009987,GO:0010035,GO:0010038,GO:0016043,GO:0016444,GO:0022607,GO:0031497,GO:…	ko:K11290
spt_1026766	protein PHYTOCHROME KINASE SUBSTRATE 3like	GO:0005575,GO:0005911,GO:0007154,GO:0007165,GO:0007602,GO:0008150,GO:0009314,GO:0009416,GO:0009506,GO:0009581,GO:0009582,GO:0009583,GO:0009585,GO:0009605,GO:0009628,GO:0009638,GO:0009639,GO:0009987,GO:0010017,GO:0016301,GO:0023052,GO:0030054,GO:0050789,GO:0050794,GO:0050896,GO:0051606,GO:0051716,GO:0055044,GO:0065007,GO:0071214,GO:0071478,GO:0071482,GO:0071489,GO:0104004	-
spt_1026767	probable methyltransferase PMT2	GO:0000139,GO:0003674,GO:0003727,GO:0003735,GO:0003824,GO:0005515,GO:0005575,GO:0005622,GO:0005623,GO:0005737,GO:0005739,GO:0005768,GO:0005783,GO:0005794,GO:0005802,GO:0008150,GO:0008152,GO:0008168,GO:0008757,GO:0009507,GO:0009793,GO:0009987,GO:0012505,GO:0016020,GO:0016021,GO:0016554,GO:0016740,GO:0016741,GO:0016829,GO:0022626,GO:0031090,GO:0031224,GO:0031410,GO:0031982,GO:0031984,GO:0032259,GO:…	-
spt_1026768	pentatricopeptide repeatcontaining protein At4g33990like	GO:0003723,GO:0003727,GO:0003735,GO:0005515,GO:0005739,GO:0005783,GO:0009451,GO:0009507,GO:0009793,GO:0009987,GO:0016554,GO:0022626,GO:0043231,GO:0080156	-
spt_1026769	activating signal cointegrator 1	GO:0002020,GO:0003674,GO:0003712,GO:0003713,GO:0005102,GO:0005488,GO:0005515,GO:0005575,GO:0005622,GO:0005623,GO:0005634,GO:0005654,GO:0005737,GO:0005813,GO:0005815,GO:0005829,GO:0005856,GO:0006139,GO:0006351,GO:0006355,GO:0006725,GO:0006807,GO:0006810,GO:0007154,GO:0007165,GO:0008134,GO:0008150,GO:0008152,GO:0008270,GO:0009058,GO:0009059,GO:0009719,GO:0009725,GO:0009755,GO:0009889,GO:0009891,GO:…	-
spt_1026770	ribonuclease H protein	-	ko:K08081,ko:K21596
spt_1026771	pentatricopeptide repeatcontaining protein At1g74580	GO:0003674,GO:0003676,GO:0003723,GO:0003727,GO:0003729,GO:0003735,GO:0003824,GO:0004518,GO:0004519,GO:0005488,GO:0005515,GO:0005575,GO:0005622,GO:0005623,GO:0005739,GO:0005783,GO:0006139,GO:0006396,GO:0006725,GO:0006807,GO:0007005,GO:0008150,GO:0008152,GO:0008168,GO:0009451,GO:0009507,GO:0009793,GO:0009987,GO:0010019,GO:0016020,GO:0016070,GO:0016554,GO:0016787,GO:0016788,GO:0022626,GO:0031930,GO:…	-
spt_1026772	pentatricopeptide repeatcontaining protein At1g74600, chloroplastic isoform X1	GO:0000959,GO:0003674,GO:0003676,GO:0003723,GO:0003727,GO:0003735,GO:0003824,GO:0004518,GO:0004519,GO:0005488,GO:0005515,GO:0005575,GO:0005622,GO:0005623,GO:0005737,GO:0005739,GO:0005783,GO:0006139,GO:0006725,GO:0006807,GO:0008150,GO:0008152,GO:0009451,GO:0009507,GO:0009536,GO:0009793,GO:0009987,GO:0016020,GO:0016070,GO:0016071,GO:0016554,GO:0016556,GO:0016787,GO:0016788,GO:0022626,GO:0034641,GO:…	-
spt_1026794	GDSL esteraselipase At1g74460	GO:0003674,GO:0003824,GO:0005575,GO:0005576,GO:0006629,GO:0008126,GO:0008150,GO:0008152,GO:0009056,GO:0016020,GO:0016042,GO:0016719,GO:0016787,GO:0016788,GO:0042335,GO:0044238,GO:0071704,GO:1901575	-
spt_1026796	CK203_048717	-	-
spt_1026797	cyclic dof factor 3	GO:0000003,GO:0003006,GO:0003674,GO:0003676,GO:0003677,GO:0003700,GO:0005488,GO:0005575,GO:0005622,GO:0005623,GO:0005634,GO:0006139,GO:0006351,GO:0006355,GO:0006725,GO:0006807,GO:0007275,GO:0008150,GO:0008152,GO:0009058,GO:0009059,GO:0009791,GO:0009889,GO:0009908,GO:0009987,GO:0010467,GO:0010468,GO:0010556,GO:0016070,GO:0018130,GO:0019219,GO:0019222,GO:0019438,GO:0022414,GO:0031323,GO:0031326,GO:…	ko:K16222
spt_1026799	LOC100262165	GO:0003676,GO:0004519,GO:0008270,GO:0016020	-
spt_1026800	calmodulinlike protein 85	GO:0005509,GO:0005515,GO:0005886,GO:0016020,GO:0042802,GO:1901527	ko:K02183
spt_1026801	lipoateprotein ligase A isoform X1	GO:0009987,GO:0016779,GO:0016874,GO:0036211,GO:0140096	-
spt_1026803	VITISV_038034	-	-
spt_1026804	agamouslike MADSbox protein AGL65	GO:0000976,GO:0000977,GO:0000981,GO:0000982,GO:0000987,GO:0001012,GO:0001067,GO:0001558,GO:0003674,GO:0003676,GO:0003677,GO:0003690,GO:0003700,GO:0005488,GO:0005515,GO:0005575,GO:0005622,GO:0005623,GO:0005634,GO:0006139,GO:0006351,GO:0006355,GO:0006357,GO:0006725,GO:0006807,GO:0007275,GO:0008150,GO:0008152,GO:0009058,GO:0009059,GO:0009555,GO:0009889,GO:0009891,GO:0009893,GO:0009987,GO:0010152,GO:…	ko:K04454,ko:K09260
spt_1026805	chlorophyll ab binding protein 4, chloroplastic	GO:0003729,GO:0005515,GO:0009409,GO:0009416,GO:0009522,GO:0009523,GO:0009535,GO:0009765,GO:0016168,GO:0019904	ko:K08910
spt_1026806	expansinA1like	GO:0005575,GO:0005576,GO:0005618,GO:0005623,GO:0008150,GO:0009653,GO:0009664,GO:0009987,GO:0010114,GO:0010119,GO:0016020,GO:0016043,GO:0030312,GO:0044464,GO:0045229,GO:0071554,GO:0071555,GO:0071669,GO:0071840,GO:0071944	ko:K20628
spt_1029153	unnamed	-	ko:K20102
spt_1029155	Retrovirusrelated Pol polyprotein	GO:0003676,GO:0008270	-
spt_1029156	Retrovirusrelated Pol polyprotein	GO:0003964,GO:0006278	-
spt_1029158	tRNA nucleotidyltransferase cca2 isoform X2	GO:0000166,GO:0001680,GO:0003674,GO:0003676,GO:0003723,GO:0003824,GO:0004652,GO:0004810,GO:0005488,GO:0005524,GO:0005575,GO:0005622,GO:0005623,GO:0005634,GO:0005737,GO:0005739,GO:0005759,GO:0006139,GO:0006396,GO:0006399,GO:0006725,GO:0006807,GO:0008033,GO:0008144,GO:0008150,GO:0008152,GO:0009809,GO:0009987,GO:0010467,GO:0016070,GO:0016740,GO:0016772,GO:0016779,GO:0016787,GO:0017076,GO:0030554,GO:…	ko:K00974
spt_1030023	Retrovirusrelated Pol polyprotein	-	-
spt_1030024	-	GO:0000166,GO:0002218,GO:0002252,GO:0002253,GO:0002376,GO:0002682,GO:0002684,GO:0003674,GO:0005488,GO:0005515,GO:0005524,GO:0005575,GO:0005622,GO:0005623,GO:0005634,GO:0005694,GO:0005737,GO:0005739,GO:0005886,GO:0006950,GO:0006952,GO:0006955,GO:0007154,GO:0007165,GO:0007275,GO:0008144,GO:0008150,GO:0008219,GO:0008757,GO:0009314,GO:0009416,GO:0009507,GO:0009605,GO:0009607,GO:0009615,GO:0009617,GO:…	ko:K16226
spt_1030050	eukaryotic translation initiation factor 2D isoform X1	GO:0001731,GO:0002181,GO:0002183,GO:0003674,GO:0003676,GO:0003723,GO:0003743,GO:0005488,GO:0005575,GO:0005622,GO:0005623,GO:0005634,GO:0005654,GO:0005737,GO:0005829,GO:0005840,GO:0005975,GO:0006098,GO:0006412,GO:0006413,GO:0006518,GO:0006807,GO:0006996,GO:0008135,GO:0008150,GO:0008152,GO:0009058,GO:0009059,GO:0009987,GO:0010467,GO:0015935,GO:0016020,GO:0016032,GO:0016043,GO:0016604,GO:0017057,GO:…	ko:K15027
spt_1030051	-	GO:0003677	-
spt_1030052	VITISV_007508	GO:0003677,GO:0046983	-
spt_1030053	Mitochondrial import inner membrane translocase subunit TIM231	GO:0003674,GO:0005215,GO:0005575,GO:0005622,GO:0005623,GO:0005737,GO:0005739,GO:0005740,GO:0005743,GO:0005744,GO:0006605,GO:0006626,GO:0006810,GO:0006839,GO:0006886,GO:0006996,GO:0007005,GO:0008104,GO:0008150,GO:0008320,GO:0008565,GO:0009987,GO:0015031,GO:0015399,GO:0015405,GO:0015450,GO:0015833,GO:0016020,GO:0016021,GO:0016043,GO:0017038,GO:0019866,GO:0022804,GO:0022857,GO:0022884,GO:0030150,GO:…	ko:K17794
spt_1030533	cyclic nucleotidegated ion channel 4	GO:0000166,GO:0002376,GO:0003674,GO:0005215,GO:0005216,GO:0005244,GO:0005249,GO:0005261,GO:0005267,GO:0005488,GO:0005515,GO:0005516,GO:0005575,GO:0005623,GO:0005886,GO:0005887,GO:0006810,GO:0006811,GO:0006812,GO:0006813,GO:0006950,GO:0006952,GO:0006955,GO:0008150,GO:0008219,GO:0008324,GO:0009626,GO:0009987,GO:0012501,GO:0015075,GO:0015077,GO:0015079,GO:0015267,GO:0015318,GO:0015672,GO:0016020,GO:…	ko:K05391
spt_1030534	dynein light chain 2, cytoplasmic	GO:0005737,GO:0005868,GO:0005874,GO:0007017,GO:0016020,GO:0016787,GO:0030286,GO:0045505	ko:K10418
spt_1030535	LOC100267563	-	-
spt_1030536	CK203_062169	-	-
spt_1030537	vesicleassociated protein 41	GO:0005575,GO:0005622,GO:0005623,GO:0005737,GO:0005783,GO:0005789,GO:0005886,GO:0006950,GO:0006970,GO:0008150,GO:0009536,GO:0009628,GO:0012505,GO:0016020,GO:0031984,GO:0042175,GO:0043226,GO:0043227,GO:0043229,GO:0043231,GO:0043495,GO:0044422,GO:0044424,GO:0044425,GO:0044432,GO:0044444,GO:0044446,GO:0044464,GO:0050896,GO:0061817,GO:0071944,GO:0090158,GO:0098827	-
spt_1030539	LOC100248633	-	-
spt_1030540	LOC100255568	GO:0016020	-
spt_1030541	LOC100260642	GO:0016020	-
spt_1030832	imidazole glycerol phosphate synthase hisHF, chloroplastic isoform X1	GO:0000105,GO:0000107,GO:0003824,GO:0004359,GO:0006541,GO:0008168,GO:0009507,GO:0016833,GO:0016853,GO:0032259,GO:0042819,GO:0042823	ko:K01663
spt_1030833	Mitogenactivated protein kinase kinase kinase 18	GO:0000165,GO:0000166,GO:0000186,GO:0001932,GO:0001934,GO:0002215,GO:0003674,GO:0003824,GO:0004672,GO:0004674,GO:0004709,GO:0005488,GO:0005515,GO:0005524,GO:0005575,GO:0005622,GO:0005623,GO:0005634,GO:0005730,GO:0005737,GO:0005886,GO:0005938,GO:0006464,GO:0006468,GO:0006793,GO:0006796,GO:0006807,GO:0006950,GO:0007154,GO:0007165,GO:0007346,GO:0008144,GO:0008150,GO:0008152,GO:0009653,GO:0009893,GO:…	ko:K20716
spt_1030834	-	GO:0003674,GO:0003700,GO:0003824,GO:0004175,GO:0004190,GO:0005515,GO:0005575,GO:0005622,GO:0005623,GO:0005634,GO:0005737,GO:0005773,GO:0006355,GO:0006508,GO:0006629,GO:0006807,GO:0008150,GO:0008152,GO:0008233,GO:0009056,GO:0009057,GO:0009987,GO:0016787,GO:0019538,GO:0030163,GO:0043170,GO:0043226,GO:0043227,GO:0043229,GO:0043231,GO:0043565,GO:0044238,GO:0044424,GO:0044444,GO:0044464,GO:0070001,GO:…	ko:K08245
spt_1030835	Splicing factor, suppressor of whiteapricotlike	GO:0000245,GO:0000375,GO:0000377,GO:0000380,GO:0000395,GO:0000398,GO:0003674,GO:0003676,GO:0003723,GO:0004672,GO:0005488,GO:0005524,GO:0005575,GO:0005622,GO:0005623,GO:0005634,GO:0006139,GO:0006351,GO:0006355,GO:0006376,GO:0006396,GO:0006397,GO:0006725,GO:0006807,GO:0008150,GO:0008152,GO:0008380,GO:0009058,GO:0009059,GO:0009889,GO:0009892,GO:0009987,GO:0010467,GO:0010468,GO:0010556,GO:0010605,GO:…	-
spt_1031375	E3 ubiquitinprotein ligase UPL6	GO:0003674,GO:0003824,GO:0004842,GO:0005575,GO:0005622,GO:0005623,GO:0005634,GO:0005737,GO:0006464,GO:0006807,GO:0008150,GO:0008152,GO:0009987,GO:0016567,GO:0016740,GO:0019538,GO:0019787,GO:0032446,GO:0036211,GO:0043170,GO:0043412,GO:0044237,GO:0044238,GO:0044260,GO:0044267,GO:0044424,GO:0044464,GO:0061630,GO:0061659,GO:0070647,GO:0071704,GO:0140096,GO:1901564	ko:K10589
spt_1031376	LOC100261309	-	-
spt_1031377	protein Iojap, chloroplastic	GO:0000427,GO:0003674,GO:0005488,GO:0005575,GO:0005622,GO:0005623,GO:0005737,GO:0006417,GO:0008150,GO:0009507,GO:0009536,GO:0009889,GO:0009890,GO:0009892,GO:0010468,GO:0010556,GO:0010558,GO:0010605,GO:0010608,GO:0010629,GO:0017148,GO:0019222,GO:0031323,GO:0031324,GO:0031326,GO:0031327,GO:0032268,GO:0032269,GO:0034248,GO:0034249,GO:0042644,GO:0043021,GO:0043023,GO:0043226,GO:0043227,GO:0043229,GO:…	-
spt_1031378	60S ribosomal protein L27	GO:0003674,GO:0003735,GO:0005198,GO:0005575,GO:0005622,GO:0005623,GO:0005737,GO:0005829,GO:0005840,GO:0005844,GO:0006412,GO:0006518,GO:0006807,GO:0008150,GO:0008152,GO:0009058,GO:0009059,GO:0009987,GO:0010467,GO:0015934,GO:0016020,GO:0019538,GO:0022625,GO:0022626,GO:0032991,GO:0034641,GO:0034645,GO:0042788,GO:0043043,GO:0043170,GO:0043226,GO:0043228,GO:0043229,GO:0043232,GO:0043603,GO:0043604,GO:…	ko:K02901
spt_1031583	LOC100243255	-	-
spt_1031584	cyclinB31	GO:0000307,GO:0005575,GO:0005622,GO:0005623,GO:0005634,GO:0005737,GO:0005815,GO:0007049,GO:0008150,GO:0009987,GO:0016020,GO:0016538,GO:0043226,GO:0043227,GO:0043229,GO:0043231,GO:0044424,GO:0044464,GO:0044772,GO:0044843,GO:0051301	ko:K21777
spt_1031585	CK203_028150	GO:0005515,GO:0019762	-
spt_1031587	2dehydro3deoxyphosphooctonate aldolase isoform X1	GO:0000003,GO:0000271,GO:0000902,GO:0000904,GO:0003006,GO:0003674,GO:0003824,GO:0005575,GO:0005622,GO:0005623,GO:0005737,GO:0005975,GO:0005976,GO:0005996,GO:0008150,GO:0008152,GO:0008676,GO:0009058,GO:0009059,GO:0009653,GO:0009664,GO:0009826,GO:0009832,GO:0009856,GO:0009860,GO:0009932,GO:0009987,GO:0010306,GO:0010383,GO:0010393,GO:0010396,GO:0016043,GO:0016049,GO:0016051,GO:0016740,GO:0016765,GO:…	ko:K01627
spt_1031588	unnamed	GO:0005575,GO:0005622,GO:0005623,GO:0005737,GO:0005739,GO:0005740,GO:0005743,GO:0007005,GO:0016020,GO:0016021,GO:0019866,GO:0031090,GO:0031224,GO:0031966,GO:0031967,GO:0031975,GO:0043226,GO:0043227,GO:0043229,GO:0043231,GO:0044422,GO:0044424,GO:0044425,GO:0044429,GO:0044444,GO:0044446,GO:0044464	ko:K17081
spt_2000079	protein GDAP2 homolog isoform X2	GO:0003677,GO:0016020	-
spt_2002449	-	GO:0005515,GO:0019762	-
spt_2002450	LOC100253981	-	-
spt_2002451	phosphoacetylglucosamine mutase	GO:0000287,GO:0003674,GO:0003824,GO:0004610,GO:0005488,GO:0005575,GO:0005622,GO:0005623,GO:0005737,GO:0005739,GO:0005829,GO:0005911,GO:0005975,GO:0006040,GO:0006047,GO:0006048,GO:0006139,GO:0006259,GO:0006281,GO:0006725,GO:0006793,GO:0006807,GO:0006950,GO:0006974,GO:0008150,GO:0008152,GO:0009058,GO:0009225,GO:0009226,GO:0009506,GO:0009987,GO:0016020,GO:0016853,GO:0016866,GO:0016868,GO:0018130,GO:…	ko:K01836
spt_2002452	transcription factor MAMYBlike	GO:0003674,GO:0003676,GO:0003677,GO:0003682,GO:0005488,GO:0005515,GO:0005575,GO:0005622,GO:0005623,GO:0005634,GO:0005737,GO:0005783,GO:0005789,GO:0005829,GO:0005886,GO:0006139,GO:0006325,GO:0006351,GO:0006355,GO:0006450,GO:0006725,GO:0006807,GO:0006996,GO:0007275,GO:0008150,GO:0008152,GO:0009058,GO:0009059,GO:0009653,GO:0009736,GO:0009888,GO:0009889,GO:0009891,GO:0009893,GO:0009987,GO:0010015,GO:…	-
spt_2002453	calciumbinding protein PBP1like	GO:0005509,GO:0005515,GO:0005886,GO:1901527	ko:K16465
spt_2002454	calciumbinding protein PBP1like	GO:0005509,GO:0005515,GO:0005886,GO:1901527	ko:K16465
spt_2002456	calciumbinding protein PBP1	GO:0005509,GO:0005515,GO:0005886,GO:1901527	ko:K16465
spt_2002592	plastoglobulin1, chloroplastic	GO:0005575,GO:0005622,GO:0005623,GO:0005737,GO:0009507,GO:0009532,GO:0009534,GO:0009535,GO:0009536,GO:0009570,GO:0009579,GO:0010287,GO:0016020,GO:0031976,GO:0031984,GO:0032440,GO:0034357,GO:0042651,GO:0043226,GO:0043227,GO:0043229,GO:0043231,GO:0044422,GO:0044424,GO:0044434,GO:0044435,GO:0044436,GO:0044444,GO:0044446,GO:0044464,GO:0055035	-
spt_2002593	probable calciumbinding protein CML18	GO:0000325,GO:0003674,GO:0005488,GO:0005509,GO:0005515,GO:0005575,GO:0005622,GO:0005623,GO:0005737,GO:0005773,GO:0005886,GO:0008150,GO:0016460,GO:0030234,GO:0032588,GO:0032879,GO:0042802,GO:0043167,GO:0043169,GO:0043226,GO:0043227,GO:0043229,GO:0043231,GO:0043269,GO:0044424,GO:0044444,GO:0044464,GO:0046872,GO:0050789,GO:0051049,GO:0065007,GO:1901527	ko:K13448
spt_2002594	dolicholphosphate mannose synthase subunit 2	GO:0003674,GO:0004582,GO:0005575,GO:0005622,GO:0005623,GO:0005737,GO:0005783,GO:0005789,GO:0006066,GO:0006464,GO:0006486,GO:0006493,GO:0006497,GO:0006505,GO:0006506,GO:0006629,GO:0006643,GO:0006644,GO:0006650,GO:0006661,GO:0006664,GO:0006720,GO:0006793,GO:0006796,GO:0006807,GO:0008150,GO:0008152,GO:0008610,GO:0008654,GO:0009058,GO:0009059,GO:0009100,GO:0009101,GO:0009247,GO:0009987,GO:0012505,GO:…	ko:K09658
spt_2002595	LOC100260748	GO:0005789,GO:0006486,GO:0019348,GO:0030234	-
spt_2002596	CK203_003064	GO:0046983	-
spt_2002826	L10interacting MYB domaincontaining proteinlike	-	-
spt_2002847	Pentatricopeptide repeatcontaining protein	GO:0003723,GO:0003727,GO:0003735,GO:0005515,GO:0005739,GO:0005783,GO:0009451,GO:0009507,GO:0009793,GO:0009987,GO:0016554,GO:0022626,GO:0080156	-
spt_2002848	Retrovirusrelated Pol polyprotein	GO:0004491,GO:0016020	-
spt_2004306	C6G9.01c	-	-
spt_2004308	Ferrochelatase2, chloroplastic	GO:0003674,GO:0003824,GO:0004325,GO:0005575,GO:0005622,GO:0005623,GO:0005737,GO:0005739,GO:0006725,GO:0006778,GO:0006779,GO:0006783,GO:0006807,GO:0006950,GO:0006979,GO:0008150,GO:0008152,GO:0009058,GO:0009507,GO:0009526,GO:0009534,GO:0009535,GO:0009536,GO:0009579,GO:0009941,GO:0009987,GO:0016020,GO:0016829,GO:0018130,GO:0019438,GO:0031090,GO:0031967,GO:0031969,GO:0031975,GO:0031976,GO:0031984,GO:…	ko:K01772
spt_2004309	LOC100267911	GO:0000276,GO:0003746,GO:0005261,GO:0006414,GO:0015078,GO:0015986,GO:0016874,GO:0031966,GO:0045263,GO:1902600	ko:K02140
spt_2004310	far upstream elementbinding protein 2	GO:0001505,GO:0003674,GO:0003676,GO:0003677,GO:0003723,GO:0003729,GO:0003730,GO:0003735,GO:0005488,GO:0005575,GO:0005622,GO:0005623,GO:0005634,GO:0005654,GO:0005737,GO:0005829,GO:0006139,GO:0006351,GO:0006355,GO:0006396,GO:0006397,GO:0006401,GO:0006402,GO:0006403,GO:0006417,GO:0006725,GO:0006807,GO:0006810,GO:0008150,GO:0008152,GO:0008380,GO:0009056,GO:0009057,GO:0009058,GO:0009059,GO:0009889,GO:…	ko:K13210
spt_2004311	VITISV_021597	GO:0003674,GO:0003824,GO:0003954,GO:0005488,GO:0005575,GO:0005622,GO:0005623,GO:0005737,GO:0005739,GO:0005740,GO:0005743,GO:0005746,GO:0005747,GO:0008137,GO:0008150,GO:0008152,GO:0008270,GO:0009060,GO:0009507,GO:0009579,GO:0015990,GO:0016020,GO:0016491,GO:0016651,GO:0016655,GO:0019866,GO:0030964,GO:0031090,GO:0031966,GO:0031967,GO:0031975,GO:0032981,GO:0032991,GO:0043167,GO:0043169,GO:0043226,GO:…	ko:K03940
spt_2004358	GATA transcription factor 22	GO:0000976,GO:0000977,GO:0000981,GO:0001012,GO:0001067,GO:0001085,GO:0001101,GO:0001228,GO:0003674,GO:0003676,GO:0003677,GO:0003682,GO:0003690,GO:0003700,GO:0005488,GO:0005515,GO:0005575,GO:0005622,GO:0005623,GO:0005634,GO:0005667,GO:0006139,GO:0006351,GO:0006355,GO:0006357,GO:0006366,GO:0006725,GO:0006807,GO:0006996,GO:0007154,GO:0007165,GO:0007275,GO:0007568,GO:0007623,GO:0008134,GO:0008150,GO:…	-
spt_2004364	conserved oligomeric Golgi complex subunit 8	GO:0000139,GO:0006891,GO:0007030,GO:0009860,GO:0015031,GO:0017119,GO:0042803	ko:K20295
spt_2004748	CK203_005308	-	-
spt_2004920	chorismate mutase 2	GO:0003674,GO:0003824,GO:0004106,GO:0005575,GO:0005622,GO:0005623,GO:0005737,GO:0005829,GO:0006082,GO:0006520,GO:0006725,GO:0006807,GO:0008150,GO:0008152,GO:0008652,GO:0009058,GO:0009072,GO:0009073,GO:0009987,GO:0016020,GO:0016053,GO:0016853,GO:0016866,GO:0019438,GO:0019752,GO:0042803,GO:0043436,GO:0043648,GO:0043650,GO:0044237,GO:0044238,GO:0044249,GO:0044281,GO:0044283,GO:0044424,GO:0044444,GO:…	ko:K01850
spt_2004921	DNAdirected RNA polymerases IV and V subunit 2	GO:0000228,GO:0000418,GO:0000419,GO:0000428,GO:0000785,GO:0000790,GO:0000792,GO:0001054,GO:0001055,GO:0001056,GO:0001057,GO:0001058,GO:0001059,GO:0001060,GO:0001065,GO:0001066,GO:0001882,GO:0002682,GO:0003674,GO:0003676,GO:0003677,GO:0003824,GO:0003899,GO:0004106,GO:0005488,GO:0005575,GO:0005622,GO:0005623,GO:0005634,GO:0005654,GO:0005694,GO:0005720,GO:0005730,GO:0005736,GO:0006139,GO:0006259,GO:…	ko:K03010,ko:K16252
spt_2004922	probable kinetochore protein NUF2	GO:0000003,GO:0000070,GO:0000228,GO:0000278,GO:0000280,GO:0000775,GO:0000776,GO:0000777,GO:0000778,GO:0000779,GO:0000780,GO:0000793,GO:0000794,GO:0000819,GO:0005575,GO:0005622,GO:0005623,GO:0005634,GO:0005694,GO:0005737,GO:0005773,GO:0005774,GO:0005815,GO:0005816,GO:0005828,GO:0005856,GO:0005886,GO:0006996,GO:0007049,GO:0007052,GO:0007059,GO:0007080,GO:0007127,GO:0007186,GO:0008150,GO:0008608,GO:…	ko:K11548
spt_2004938	mitochondrial import inner membrane translocase subunit TIM232	GO:0005575,GO:0005622,GO:0005623,GO:0005737,GO:0005739,GO:0005740,GO:0005743,GO:0005744,GO:0006605,GO:0006626,GO:0006810,GO:0006839,GO:0006886,GO:0006996,GO:0007005,GO:0008104,GO:0008150,GO:0008320,GO:0009987,GO:0015031,GO:0015833,GO:0016020,GO:0016021,GO:0016043,GO:0017038,GO:0019866,GO:0030150,GO:0031090,GO:0031224,GO:0031300,GO:0031301,GO:0031304,GO:0031305,GO:0031966,GO:0031967,GO:0031975,GO:…	ko:K17794
spt_2005107	PH, RCC1 and FYVE domainscontaining protein 1	GO:0003008,GO:0003674,GO:0003824,GO:0004842,GO:0005085,GO:0005086,GO:0005488,GO:0005515,GO:0005575,GO:0005622,GO:0005623,GO:0005737,GO:0005794,GO:0005829,GO:0006464,GO:0006807,GO:0007275,GO:0007399,GO:0007417,GO:0007420,GO:0008150,GO:0008152,GO:0009653,GO:0009892,GO:0009894,GO:0009895,GO:0009987,GO:0010506,GO:0010507,GO:0012505,GO:0016020,GO:0016043,GO:0016567,GO:0016740,GO:0019222,GO:0019538,GO:…	-
spt_2005125	Retrovirusrelated Pol polyprotein	GO:0003676,GO:0003720,GO:0006278,GO:0016301	-
spt_2005126	VITISV_042891	GO:0003964,GO:0006278	-
spt_2005127	pentatricopeptide repeatcontaining protein At2g17140	GO:0003727,GO:0003735,GO:0005515,GO:0005739,GO:0005783,GO:0009507,GO:0009793,GO:0016554,GO:0022626,GO:0080156	-
spt_2005141	Retrovirusrelated Pol polyprotein	GO:0003676	-
spt_2005253	VITISV_001597	-	-
spt_2006974	Retrovirusrelated Pol polyprotein	GO:0006278,GO:0016772,GO:0140097	-
spt_2007003	Transposon Tf22 polyprotein	GO:0003964,GO:0004190,GO:0004519,GO:0006278,GO:0006508	-
spt_2007296	Fboxkelchrepeat protein At3g06240like	-	-
spt_2007565	VITISV_025494	GO:0003676,GO:0009987,GO:0015074	-
spt_2007667	thioredoxinlike fold domaincontaining protein MRL7L, chloroplastic	GO:0005575,GO:0005622,GO:0005623,GO:0005737,GO:0006355,GO:0006996,GO:0008150,GO:0009507,GO:0009532,GO:0009536,GO:0009570,GO:0009657,GO:0009658,GO:0009889,GO:0009987,GO:0010468,GO:0010556,GO:0016020,GO:0016043,GO:0016853,GO:0019219,GO:0019222,GO:0031323,GO:0031326,GO:0043226,GO:0043227,GO:0043229,GO:0043231,GO:0044422,GO:0044424,GO:0044434,GO:0044435,GO:0044444,GO:0044446,GO:0044464,GO:0050789,GO:…	-
spt_2007669	4hydroxytetrahydrodipicolinate reductase 1, chloroplastic	GO:0000166,GO:0003674,GO:0003824,GO:0005488,GO:0005575,GO:0005622,GO:0005623,GO:0005737,GO:0006082,GO:0006520,GO:0006553,GO:0006807,GO:0008150,GO:0008152,GO:0008652,GO:0008839,GO:0009058,GO:0009066,GO:0009067,GO:0009085,GO:0009089,GO:0009507,GO:0009532,GO:0009536,GO:0009570,GO:0009987,GO:0016020,GO:0016053,GO:0016491,GO:0016627,GO:0016628,GO:0019752,GO:0019877,GO:0036094,GO:0043167,GO:0043168,GO:…	ko:K00215
spt_2007670	CK203_057788	-	ko:K12471
spt_2007672	inactive glucose1phosphate adenylyltransferase small subunit 2, chloroplastic isoform X1	GO:0000166,GO:0000271,GO:0000906,GO:0003674,GO:0003824,GO:0005488,GO:0005524,GO:0005575,GO:0005622,GO:0005623,GO:0005737,GO:0005975,GO:0005976,GO:0005977,GO:0005978,GO:0005982,GO:0006073,GO:0006091,GO:0006112,GO:0008144,GO:0008150,GO:0008152,GO:0008878,GO:0009058,GO:0009059,GO:0009231,GO:0009250,GO:0009349,GO:0009507,GO:0009536,GO:0009987,GO:0015980,GO:0016020,GO:0016051,GO:0016740,GO:0016772,GO:…	ko:K00975
spt_2007673	RAP domaincontaining protein, chloroplastic	GO:0000963,GO:0003674,GO:0003676,GO:0003723,GO:0005488,GO:0005575,GO:0005622,GO:0005623,GO:0005737,GO:0005759,GO:0005829,GO:0006139,GO:0006364,GO:0006396,GO:0006725,GO:0006807,GO:0006950,GO:0006952,GO:0008150,GO:0008152,GO:0009269,GO:0009295,GO:0009507,GO:0009532,GO:0009536,GO:0009570,GO:0009987,GO:0010467,GO:0016070,GO:0016072,GO:0016301,GO:0022613,GO:0034470,GO:0034641,GO:0034660,GO:0035770,GO:…	-
spt_2007674	LOC117914560	GO:0001101,GO:0005829,GO:0006950,GO:0008150,GO:0009269,GO:0009414,GO:0009415,GO:0009628,GO:0010035,GO:0016020,GO:0042221,GO:0050896,GO:1901700	-
spt_2007704	expansinA10	GO:0005576,GO:0009653,GO:0009664,GO:0016020,GO:0042545	ko:K20628
spt_2007954	CK203_039056	-	-
spt_2007955	unnamed	-	-
spt_2007956	cinnamoylCoA reductase 1like	GO:0003674,GO:0003824,GO:0003854,GO:0005488,GO:0006694,GO:0008150,GO:0008152,GO:0009058,GO:0009718,GO:0009812,GO:0009813,GO:0016020,GO:0016491,GO:0016614,GO:0016616,GO:0016621,GO:0042440,GO:0045552,GO:0046148,GO:0046283,GO:0047890,GO:0048037,GO:0050662,GO:0055114,GO:0071704,GO:1901576	-
spt_2007957	cinnamoylCoA reductase 1	GO:0003674,GO:0003824,GO:0003854,GO:0005488,GO:0005737,GO:0006694,GO:0008150,GO:0008152,GO:0009058,GO:0009699,GO:0009718,GO:0009812,GO:0009813,GO:0009987,GO:0016020,GO:0016491,GO:0016614,GO:0016616,GO:0016621,GO:0042440,GO:0045552,GO:0046148,GO:0046283,GO:0047890,GO:0048037,GO:0050662,GO:0055114,GO:0071704,GO:1901576	-
spt_2007958	phospholipase A1Igamma3, chloroplastic	GO:0003674,GO:0003824,GO:0004620,GO:0004806,GO:0005575,GO:0005622,GO:0005623,GO:0005737,GO:0006629,GO:0008150,GO:0008152,GO:0008970,GO:0009056,GO:0009507,GO:0009536,GO:0009987,GO:0016042,GO:0016298,GO:0016787,GO:0016788,GO:0043226,GO:0043227,GO:0043229,GO:0043231,GO:0044238,GO:0044424,GO:0044444,GO:0044464,GO:0047714,GO:0052689,GO:0052739,GO:0071704,GO:1901575	-
spt_2007959	protein RETICULATARELATED 4, chloroplastic	GO:0005575,GO:0005622,GO:0005623,GO:0005737,GO:0005739,GO:0007275,GO:0008150,GO:0009507,GO:0009526,GO:0009528,GO:0009536,GO:0009706,GO:0009941,GO:0016020,GO:0016021,GO:0019866,GO:0031090,GO:0031224,GO:0031967,GO:0031969,GO:0031975,GO:0032501,GO:0032502,GO:0042170,GO:0043226,GO:0043227,GO:0043229,GO:0043231,GO:0044422,GO:0044424,GO:0044425,GO:0044434,GO:0044435,GO:0044444,GO:0044446,GO:0044464,GO:…	-
spt_2007960	NAD(H) kinase 1 isoform X3	GO:0000166,GO:0003674,GO:0003824,GO:0003951,GO:0005488,GO:0005524,GO:0006139,GO:0006725,GO:0006732,GO:0006733,GO:0006739,GO:0006741,GO:0006753,GO:0006793,GO:0006796,GO:0006807,GO:0008144,GO:0008150,GO:0008152,GO:0009058,GO:0009108,GO:0009117,GO:0009165,GO:0009987,GO:0016301,GO:0016310,GO:0016740,GO:0016772,GO:0016773,GO:0017076,GO:0018130,GO:0019359,GO:0019362,GO:0019363,GO:0019438,GO:0019637,GO:…	ko:K00858
spt_2007962	protein TRAUCO	GO:0000976,GO:0005515,GO:0008168,GO:0009793,GO:0009987,GO:0010228,GO:0030246,GO:0031490,GO:0032259,GO:0048188,GO:0060776	ko:K13113,ko:K14964
spt_2007964	DNAbinding protein REB1	GO:0001067,GO:0003677,GO:0003743,GO:0005634,GO:0006355,GO:0006413,GO:0009736,GO:0010026,GO:0010597,GO:0090506	ko:K21625
spt_2007982	alpha carbonic anhydrase 7	GO:0003674,GO:0003824,GO:0004089,GO:0005488,GO:0005575,GO:0005622,GO:0005623,GO:0005737,GO:0006730,GO:0008150,GO:0008270,GO:0009507,GO:0009532,GO:0009536,GO:0009570,GO:0010033,GO:0010037,GO:0016020,GO:0016491,GO:0016829,GO:0016835,GO:0016836,GO:0042221,GO:0042493,GO:0043167,GO:0043169,GO:0043226,GO:0043227,GO:0043229,GO:0043231,GO:0044422,GO:0044424,GO:0044434,GO:0044435,GO:0044444,GO:0044446,GO:…	ko:K01674
spt_2007983	lysM domain receptorlike kinase 4	GO:0000166,GO:0002215,GO:0003674,GO:0003824,GO:0004672,GO:0004674,GO:0004675,GO:0004888,GO:0005488,GO:0005515,GO:0005524,GO:0005575,GO:0005623,GO:0005634,GO:0005730,GO:0005886,GO:0006464,GO:0006468,GO:0006793,GO:0006796,GO:0006807,GO:0007154,GO:0007165,GO:0007166,GO:0007167,GO:0007178,GO:0008144,GO:0008150,GO:0008152,GO:0009987,GO:0016020,GO:0016021,GO:0016301,GO:0016310,GO:0016740,GO:0016772,GO:…	-
spt_2008434	inositol 3kinase	GO:0000166,GO:0003674,GO:0003824,GO:0005488,GO:0005524,GO:0005634,GO:0005829,GO:0006066,GO:0006793,GO:0006796,GO:0008144,GO:0008150,GO:0008152,GO:0008865,GO:0009058,GO:0009987,GO:0010264,GO:0016301,GO:0016310,GO:0016740,GO:0016772,GO:0016773,GO:0017076,GO:0017144,GO:0019140,GO:0019637,GO:0019751,GO:0030554,GO:0032553,GO:0032555,GO:0032559,GO:0032958,GO:0033517,GO:0035639,GO:0036094,GO:0043167,GO:…	ko:K19517
spt_2008570	peroxidase 4like	GO:0003674,GO:0003824,GO:0004601,GO:0005488,GO:0005575,GO:0005576,GO:0006950,GO:0006979,GO:0008150,GO:0008152,GO:0009056,GO:0009636,GO:0009987,GO:0010228,GO:0016209,GO:0016491,GO:0016684,GO:0016999,GO:0017001,GO:0017144,GO:0020037,GO:0042221,GO:0042737,GO:0042743,GO:0042744,GO:0043167,GO:0043169,GO:0044237,GO:0044248,GO:0046872,GO:0046906,GO:0048037,GO:0050896,GO:0051186,GO:0051187,GO:0051716,GO:…	ko:K00430
spt_2008571	LOB domaincontaining protein 15 isoform X1	GO:0016020	-
spt_2008572	pentatricopeptide repeatcontaining protein At3g46870	GO:0003674,GO:0003676,GO:0003723,GO:0003727,GO:0003729,GO:0003824,GO:0004518,GO:0004519,GO:0005488,GO:0005515,GO:0005575,GO:0005622,GO:0005623,GO:0005737,GO:0006139,GO:0006725,GO:0006807,GO:0008150,GO:0008152,GO:0008270,GO:0009451,GO:0009507,GO:0009536,GO:0009987,GO:0016070,GO:0016787,GO:0016788,GO:0034641,GO:0043167,GO:0043169,GO:0043170,GO:0043226,GO:0043227,GO:0043229,GO:0043231,GO:0043412,GO:…	-
spt_2008573	unnamed	-	ko:K03978
spt_2008574	CK203_008352	-	-
spt_2008575	pentatricopeptide repeatcontaining protein At1g08070, chloroplasticlike	GO:0003723,GO:0003727,GO:0003735,GO:0005515,GO:0005739,GO:0005783,GO:0008270,GO:0009451,GO:0009507,GO:0009793,GO:0009987,GO:0016554,GO:0016787,GO:0022626,GO:0080156	-
spt_2008658	Retrovirusrelated Pol polyprotein	-	-
spt_2009192	LOC104880278	GO:0046872	-
spt_2009733	nicotinamide adenine dinucleotide transporter 1, chloroplastic isoform X1	GO:0003674,GO:0005215,GO:0005575,GO:0005622,GO:0005623,GO:0005737,GO:0005739,GO:0005740,GO:0005743,GO:0006810,GO:0006839,GO:0006862,GO:0008150,GO:0009507,GO:0009526,GO:0009536,GO:0009941,GO:0015215,GO:0015291,GO:0015297,GO:0015605,GO:0015748,GO:0015931,GO:0015932,GO:0016020,GO:0016021,GO:0019866,GO:0022804,GO:0022857,GO:0031090,GO:0031224,GO:0031966,GO:0031967,GO:0031969,GO:0031975,GO:0035352,GO:…	ko:K15115
spt_2009797	prolinerich receptorlike protein kinase PERK15 isoform X2	GO:0000003,GO:0000166,GO:0002215,GO:0003006,GO:0003674,GO:0003824,GO:0004672,GO:0004674,GO:0004675,GO:0004857,GO:0004888,GO:0005488,GO:0005515,GO:0005524,GO:0005575,GO:0005623,GO:0005634,GO:0005730,GO:0005886,GO:0006338,GO:0006464,GO:0006468,GO:0006793,GO:0006796,GO:0006807,GO:0007154,GO:0007165,GO:0007166,GO:0007167,GO:0007178,GO:0007275,GO:0008144,GO:0008150,GO:0008152,GO:0009653,GO:0009790,GO:…	-
spt_2009798	VITISV_041989	GO:0000166,GO:0000373,GO:0003674,GO:0003676,GO:0003723,GO:0003724,GO:0003729,GO:0003824,GO:0004004,GO:0004386,GO:0005488,GO:0005524,GO:0005575,GO:0005622,GO:0005623,GO:0005634,GO:0005730,GO:0005737,GO:0006139,GO:0006725,GO:0006807,GO:0008026,GO:0008144,GO:0008150,GO:0008152,GO:0008186,GO:0009506,GO:0009987,GO:0010501,GO:0016070,GO:0016462,GO:0016787,GO:0016817,GO:0016818,GO:0016887,GO:0017076,GO:…	ko:K12835
spt_2010159	Transposon TX1 uncharacterized 149 kDa protein	-	-
spt_2010214	LOW QUALITY PROTEIN: sacsin	GO:0003674,GO:0005488,GO:0005515,GO:0005575,GO:0005622,GO:0005623,GO:0005634,GO:0005737,GO:0005739,GO:0006457,GO:0008150,GO:0009987,GO:0030424,GO:0030425,GO:0030544,GO:0031072,GO:0036477,GO:0042995,GO:0043005,GO:0043226,GO:0043227,GO:0043229,GO:0043231,GO:0044087,GO:0044424,GO:0044444,GO:0044463,GO:0044464,GO:0044877,GO:0048519,GO:0048523,GO:0050789,GO:0050794,GO:0051087,GO:0051128,GO:0051129,GO:…	ko:K17592
spt_2011004	VITISV_029782	-	ko:K00512
spt_2011807	probable acylactivating enzyme 16, chloroplastic	GO:0003674,GO:0003824,GO:0005575,GO:0005622,GO:0005623,GO:0005737,GO:0006082,GO:0006629,GO:0006631,GO:0006633,GO:0008150,GO:0008152,GO:0008610,GO:0008922,GO:0009058,GO:0009507,GO:0009526,GO:0009536,GO:0009698,GO:0009941,GO:0009987,GO:0015645,GO:0016053,GO:0016207,GO:0016874,GO:0016877,GO:0016878,GO:0019752,GO:0030497,GO:0031967,GO:0031975,GO:0032787,GO:0043226,GO:0043227,GO:0043229,GO:0043231,GO:…	ko:K01897
spt_2011808	VITISV_043924	GO:0003674,GO:0005488,GO:0005575,GO:0005622,GO:0005623,GO:0005634,GO:0006355,GO:0008150,GO:0008270,GO:0009889,GO:0010468,GO:0010556,GO:0019219,GO:0019222,GO:0031323,GO:0031326,GO:0043167,GO:0043169,GO:0043226,GO:0043227,GO:0043229,GO:0043231,GO:0044424,GO:0044464,GO:0046872,GO:0046914,GO:0050789,GO:0050794,GO:0051171,GO:0051252,GO:0060255,GO:0065007,GO:0080090,GO:1903506,GO:2000112,GO:2001141	-
spt_2011809	LOC100242796 isoform X1	GO:0016020	-
spt_2011810	replication factor C subunit 3	GO:0000166,GO:0003674,GO:0003676,GO:0003677,GO:0003689,GO:0003824,GO:0005488,GO:0005524,GO:0005575,GO:0005622,GO:0005623,GO:0005634,GO:0005657,GO:0005663,GO:0005694,GO:0005739,GO:0005886,GO:0006139,GO:0006259,GO:0006260,GO:0006261,GO:0006275,GO:0006281,GO:0006310,GO:0006725,GO:0006807,GO:0006950,GO:0006974,GO:0008094,GO:0008144,GO:0008150,GO:0008152,GO:0009058,GO:0009059,GO:0009378,GO:0009507,GO:…	ko:K10756
spt_2011824	binding partner of ACD11 1 isoform X2	GO:0003676,GO:0003723,GO:0005634,GO:0016020,GO:0050832	-
spt_2011825	annexin A3	GO:0001101,GO:0001786,GO:0003674,GO:0005488,GO:0005509,GO:0005543,GO:0005544,GO:0005737,GO:0005886,GO:0006950,GO:0006970,GO:0008150,GO:0008289,GO:0009266,GO:0009408,GO:0009409,GO:0009414,GO:0009415,GO:0009628,GO:0009651,GO:0010035,GO:0042221,GO:0043167,GO:0043168,GO:0043169,GO:0046872,GO:0050896,GO:1901700	ko:K17098
spt_2011826	ubiquitinconjugating enzyme E2 2	GO:0004839,GO:0004842,GO:0005524,GO:0006281,GO:0016567,GO:0043161,GO:0061650	ko:K10573
spt_2011827	nucleolar GTPbinding protein 1 isoform X1	GO:0000054,GO:0000166,GO:0001882,GO:0001883,GO:0003674,GO:0003723,GO:0003924,GO:0005488,GO:0005515,GO:0005525,GO:0005575,GO:0005622,GO:0005623,GO:0005634,GO:0005730,GO:0005774,GO:0006139,GO:0006364,GO:0006396,GO:0006403,GO:0006405,GO:0006611,GO:0006725,GO:0006807,GO:0006810,GO:0006886,GO:0006913,GO:0008104,GO:0008150,GO:0008152,GO:0009506,GO:0009507,GO:0009536,GO:0009987,GO:0010467,GO:0015031,GO:…	ko:K06943
spt_2011869	Pentatricopeptide repeatcontaining protein	GO:0003723,GO:0003727,GO:0003735,GO:0004553,GO:0005515,GO:0005739,GO:0005783,GO:0005975,GO:0009507,GO:0009793,GO:0016554,GO:0022626,GO:0080156	ko:K15920
spt_2011870	protein LURPonerelated 8	GO:0003743,GO:0006413,GO:0016020,GO:0019904	-
spt_2011970	Pol polyprotein	GO:0003676,GO:0004523,GO:0009987,GO:0015074,GO:0016020,GO:0016779	-
spt_2012029	Retrovirusrelated Pol polyprotein	GO:0003676,GO:0004190,GO:0005575,GO:0005622,GO:0005623,GO:0005737,GO:0005739,GO:0006950,GO:0008270,GO:0009987,GO:0015074,GO:0043226,GO:0043227,GO:0043229,GO:0043231,GO:0044424,GO:0044444,GO:0044464	-
spt_2012136	LOC100241403 isoform X1	GO:0003700,GO:0005634,GO:0006355,GO:0043565,GO:0046983	-
spt_2012146	CBLinteracting serinethreonineprotein kinase 14like	GO:0000166,GO:0002215,GO:0003674,GO:0003824,GO:0004672,GO:0004674,GO:0004676,GO:0004677,GO:0004679,GO:0004694,GO:0004711,GO:0005488,GO:0005515,GO:0005524,GO:0005575,GO:0005622,GO:0005623,GO:0005634,GO:0005730,GO:0005737,GO:0005773,GO:0005886,GO:0005911,GO:0006338,GO:0006464,GO:0006468,GO:0006793,GO:0006796,GO:0006807,GO:0006979,GO:0007154,GO:0007165,GO:0008144,GO:0008150,GO:0008152,GO:0009408,GO:…	ko:K12761
spt_2012332	phenylalanine ammonialyase	GO:0001101,GO:0003674,GO:0003824,GO:0005575,GO:0005622,GO:0005623,GO:0005737,GO:0006082,GO:0006464,GO:0006508,GO:0006511,GO:0006520,GO:0006558,GO:0006559,GO:0006725,GO:0006807,GO:0008150,GO:0008152,GO:0009056,GO:0009057,GO:0009058,GO:0009063,GO:0009072,GO:0009074,GO:0009636,GO:0009698,GO:0009699,GO:0009719,GO:0009725,GO:0009739,GO:0009800,GO:0009803,GO:0009987,GO:0010033,GO:0010243,GO:0014070,GO:…	ko:K10775,ko:K13064
spt_2012951	CK203_005129	-	ko:K21249
spt_2014154	Retrovirusrelated Pol polyprotein	-	-
spt_2015452	CK203_014238	GO:0016020	-
spt_2016196	CK203_025087	-	-
spt_2017498	Retrovirusrelated Pol polyprotein	GO:0016301	-
spt_2017809	Cytosolic sulfotransferase 15	GO:0008146	ko:K22312
spt_2018751	Retrovirusrelated Pol polyprotein	-	-
spt_2019639	glutathione Stransferase DHAR2like	-	-
spt_2019641	LOC100267224	GO:0004180,GO:0016020,GO:0016740,GO:0032502	-
spt_2020074	Transposon TX1 uncharacterized 149 kDa protein	-	-
spt_2020236	CK203_096194	-	-
spt_2020238	unnamed	GO:0003674,GO:0003676,GO:0003677,GO:0005488,GO:0005575,GO:0005622,GO:0005623,GO:0005634,GO:0006139,GO:0006259,GO:0006260,GO:0006281,GO:0006310,GO:0006725,GO:0006807,GO:0006950,GO:0006974,GO:0008150,GO:0008152,GO:0009058,GO:0009059,GO:0009987,GO:0031981,GO:0033554,GO:0034641,GO:0034645,GO:0043170,GO:0043226,GO:0043227,GO:0043229,GO:0043231,GO:0044237,GO:0044238,GO:0044249,GO:0044260,GO:0044424,GO:…	ko:K10740
spt_2020422	CK203_110740	GO:0003824,GO:0003860	ko:K05605
spt_2020645	protein NRT1 PTR FAMILY 5.4	GO:0003674,GO:0005215,GO:0005575,GO:0005886,GO:0006810,GO:0006857,GO:0008150,GO:0009705,GO:0015108,GO:0015833,GO:0016020,GO:0016021,GO:0022857,GO:0031224,GO:0042886,GO:0044425,GO:0051179,GO:0051234,GO:0055085,GO:0071702,GO:0071705,GO:0080054	ko:K14638
spt_2020646	protein NRT1 PTR FAMILY 5.4like	GO:0003674,GO:0005215,GO:0005575,GO:0005886,GO:0006810,GO:0006857,GO:0008150,GO:0009705,GO:0015108,GO:0015833,GO:0016020,GO:0016021,GO:0022857,GO:0031224,GO:0042886,GO:0044425,GO:0051179,GO:0051234,GO:0055085,GO:0071702,GO:0071705,GO:0080054	ko:K14638
spt_2020647	DNAdirected RNA polymerase V subunit 1	GO:0000419,GO:0000428,GO:0001054,GO:0001055,GO:0001056,GO:0001057,GO:0001058,GO:0001059,GO:0001060,GO:0001065,GO:0001066,GO:0003674,GO:0003676,GO:0003677,GO:0003824,GO:0003899,GO:0004553,GO:0005488,GO:0005575,GO:0005622,GO:0005623,GO:0005634,GO:0005654,GO:0005666,GO:0005730,GO:0005975,GO:0006139,GO:0006259,GO:0006304,GO:0006305,GO:0006306,GO:0006351,GO:0006355,GO:0006360,GO:0006366,GO:0006383,GO:…	ko:K16251
spt_2020656	Retrovirusrelated Pol polyprotein	-	-
spt_2020657	CK203_048253	GO:0003824,GO:0005575,GO:0005622,GO:0005623,GO:0005737,GO:0005739,GO:0043226,GO:0043227,GO:0043229,GO:0043231,GO:0044424,GO:0044444,GO:0044464	ko:K22382
spt_2020658	unnamed	GO:0006952,GO:0016757,GO:0043531,GO:0051707	-
spt_2021807	protein ACCELERATED CELL DEATH 6	GO:0005515,GO:0005516,GO:0005634,GO:0005886,GO:0016020,GO:0030139,GO:0071944	ko:K15502
spt_2021825	heavy metalassociated isoprenylated plant protein 2like	GO:0003674,GO:0005488,GO:0005575,GO:0005622,GO:0005623,GO:0005737,GO:0006810,GO:0006811,GO:0006812,GO:0006873,GO:0006875,GO:0008150,GO:0009987,GO:0019725,GO:0019904,GO:0030001,GO:0030003,GO:0042592,GO:0043167,GO:0043169,GO:0044424,GO:0044464,GO:0046872,GO:0046914,GO:0046916,GO:0048878,GO:0050801,GO:0051179,GO:0051234,GO:0055065,GO:0055076,GO:0055080,GO:0055082,GO:0065007,GO:0065008,GO:0098771	-
spt_2021980	VITISV_000538	-	-
spt_2021981	CK203_044697	-	-
spt_2022546	histonelysine Nmethyltransferase, H3 lysine9 specific SUVH4	GO:0000166,GO:0000775,GO:0003674,GO:0003676,GO:0003677,GO:0003690,GO:0003824,GO:0005488,GO:0005515,GO:0005575,GO:0005622,GO:0005623,GO:0005634,GO:0005694,GO:0006139,GO:0006259,GO:0006325,GO:0006338,GO:0006464,GO:0006479,GO:0006725,GO:0006807,GO:0006996,GO:0008150,GO:0008152,GO:0008168,GO:0008170,GO:0008213,GO:0008270,GO:0008276,GO:0008327,GO:0008757,GO:0009507,GO:0009987,GO:0010216,GO:0010385,GO:…	ko:K11420
spt_2023379	acylactivating enzyme 19 isoform X2	GO:0009698,GO:0009987,GO:0043041	ko:K00142
spt_2026362	dof zinc finger protein DOF5.4	GO:0001067,GO:0003674,GO:0003676,GO:0003677,GO:0003700,GO:0005488,GO:0005575,GO:0005622,GO:0005623,GO:0005634,GO:0006139,GO:0006351,GO:0006355,GO:0006725,GO:0006807,GO:0008150,GO:0008152,GO:0009058,GO:0009059,GO:0009889,GO:0009987,GO:0010467,GO:0010468,GO:0010556,GO:0016070,GO:0018130,GO:0019219,GO:0019222,GO:0019438,GO:0031323,GO:0031326,GO:0032774,GO:0034641,GO:0034645,GO:0034654,GO:0043167,GO:…	-
spt_2026406	LOC100263840 isoform X1	GO:0005634,GO:0005744,GO:0030150	-
spt_2026432	protein NUCLEAR FUSION DEFECTIVE 4	GO:0003743,GO:0005886,GO:0006413,GO:0015108,GO:0016020,GO:0022857,GO:0055085,GO:0080054	-
spt_2026522	unnamed	GO:0016020	-
spt_2027064	LOC104882589	-	-
spt_2027115	UDPgalactose transporter 2	GO:0000139,GO:0003674,GO:0005215,GO:0005459,GO:0005575,GO:0005622,GO:0005623,GO:0005737,GO:0005794,GO:0006810,GO:0008150,GO:0008643,GO:0012505,GO:0015291,GO:0015297,GO:0015780,GO:0015931,GO:0016020,GO:0016021,GO:0022804,GO:0022857,GO:0031090,GO:0031224,GO:0031984,GO:0043226,GO:0043227,GO:0043229,GO:0043231,GO:0044422,GO:0044424,GO:0044425,GO:0044431,GO:0044444,GO:0044446,GO:0044464,GO:0051179,GO:…	ko:K15285
spt_2027116	myosin heavy chain, fast skeletal muscle	-	-
spt_2027117	Retrovirusrelated Pol polyprotein	-	-
spt_2027118	probable cellulose synthase A catalytic subunit 5	GO:0000271,GO:0000278,GO:0000281,GO:0000910,GO:0003674,GO:0003824,GO:0005488,GO:0005575,GO:0005622,GO:0005623,GO:0005737,GO:0005794,GO:0005886,GO:0005975,GO:0005976,GO:0006073,GO:0007049,GO:0008150,GO:0008152,GO:0008194,GO:0009058,GO:0009059,GO:0009250,GO:0009832,GO:0009833,GO:0009987,GO:0012505,GO:0016020,GO:0016021,GO:0016043,GO:0016051,GO:0016740,GO:0016757,GO:0016758,GO:0016759,GO:0016760,GO:…	ko:K10999
spt_2027119	At1g76660 isoform X1	GO:0005575,GO:0005623,GO:0005886,GO:0016020,GO:0044464,GO:0071944	-
spt_2027120	stromal processing peptidase, chloroplastic isoform X1	GO:0000003,GO:0003006,GO:0003674,GO:0003729,GO:0003824,GO:0004175,GO:0004222,GO:0005488,GO:0005575,GO:0005622,GO:0005623,GO:0005737,GO:0005739,GO:0005829,GO:0006508,GO:0006807,GO:0007275,GO:0008150,GO:0008152,GO:0008233,GO:0008236,GO:0008237,GO:0009507,GO:0009532,GO:0009536,GO:0009570,GO:0009790,GO:0009791,GO:0009793,GO:0009987,GO:0010154,GO:0010467,GO:0016485,GO:0016787,GO:0019538,GO:0022414,GO:…	-
spt_2028656	Retrovirusrelated Pol polyprotein	GO:0003676,GO:0004190	-
spt_2028891	laccase14like	GO:0005507,GO:0016491	ko:K05909
spt_2030244	Retrovirusrelated Pol polyprotein	-	-
spt_2031289	casein kinase 1like protein HD16	GO:0000166,GO:0002215,GO:0003674,GO:0003824,GO:0004672,GO:0004674,GO:0005488,GO:0005515,GO:0005524,GO:0005634,GO:0005730,GO:0005886,GO:0006464,GO:0006468,GO:0006793,GO:0006796,GO:0006807,GO:0008144,GO:0008150,GO:0008152,GO:0009987,GO:0016301,GO:0016310,GO:0016740,GO:0016772,GO:0016773,GO:0017076,GO:0019538,GO:0030554,GO:0032553,GO:0032555,GO:0032559,GO:0035639,GO:0036094,GO:0036211,GO:0043167,GO:…	ko:K02218

## Sheet: S9
Table S9. Functional enrichment analysis in SV-mediated candidate genes of Va_CV population
ONTOLOGY	ID	Description	GeneRatio	BgRatio	RichFactor	FoldEnrichment	zScore	pvalue	p.adjust	qvalue	geneID	Count
MF	GO:0015276	ligand-gated monoatomic ion channel activity	7/298	72/24155	0.0972222	7.88055	6.53474	3.00853e-05	0.00528364	0.00484286	spt_1015692/spt_1005045/spt_1015253/spt_1015686/spt_1015687/spt_1015691/spt_2015629	7
MF	GO:0022836	gated channel activity	9/298	142/24155	0.0633803	5.13742	5.52644	6.99575e-05	0.00528364	0.00484286	spt_1015692/spt_1005045/spt_1015253/spt_1015686/spt_1015687/spt_1015691/spt_1017150/spt_1018034/spt_2015629	9
MF	GO:0022834	ligand-gated channel activity	8/298	118/24155	0.0677966	5.49539	5.47096	0.000110545	0.00528364	0.00484286	spt_1015692/spt_1005045/spt_1015253/spt_1015686/spt_1015687/spt_1015691/spt_1017150/spt_2015629	8
MF	GO:0004970	glutamate-gated receptor activity	5/298	42/24155	0.119048	9.64965	6.27036	0.000161744	0.00528364	0.00484286	spt_1015692/spt_1005045/spt_1015686/spt_1015691/spt_2015629	5
MF	GO:0005230	extracellular ligand-gated monoatomic ion channel activity	5/298	42/24155	0.119048	9.64965	6.27036	0.000161744	0.00528364	0.00484286	spt_1015692/spt_1005045/spt_1015686/spt_1015691/spt_2015629	5
MF	GO:0008066	glutamate receptor activity	5/298	42/24155	0.119048	9.64965	6.27036	0.000161744	0.00528364	0.00484286	spt_1015692/spt_1005045/spt_1015686/spt_1015691/spt_2015629	5
MF	GO:0022824	transmitter-gated monoatomic ion channel activity	5/298	42/24155	0.119048	9.64965	6.27036	0.000161744	0.00528364	0.00484286	spt_1015692/spt_1005045/spt_1015686/spt_1015691/spt_2015629	5
MF	GO:0022835	transmitter-gated channel activity	5/298	42/24155	0.119048	9.64965	6.27036	0.000161744	0.00528364	0.00484286	spt_1015692/spt_1005045/spt_1015686/spt_1015691/spt_2015629	5
MF	GO:0030594	neurotransmitter receptor activity	5/298	42/24155	0.119048	9.64965	6.27036	0.000161744	0.00528364	0.00484286	spt_1015692/spt_1005045/spt_1015686/spt_1015691/spt_2015629	5
MF	GO:0015271	outward rectifier potassium channel activity	3/298	11/24155	0.272727	22.1065	7.82532	0.000285018	0.00837954	0.00768049	spt_1015253/spt_1017150/spt_1018034	3
MF	GO:0005216	monoatomic ion channel activity	9/298	199/24155	0.0452261	3.6659	4.22044	0.000855829	0.022874	0.0209658	spt_1015692/spt_1005045/spt_1015253/spt_1015686/spt_1015687/spt_1015691/spt_1017150/spt_1018034/spt_2015629	9

## Sheet: S10
Table. S10 Key SV-mediated Selected Genes in the Va_CV Population
Gene_ID	Gene_name	abb.
spt_1007200	probable sucrosephosphate synthase 3	SPS3
spt_1008048	cytokinin riboside 5monophosphate phosphoribohydrolase LOG1	LOG1
spt_1010980	methylesterase 10like	AMAT
spt_1012805	probable sugar phosphatephosphate translocator	SPT
spt_1014934	betaamyrin synthase 1like isoform X1
spt_1015686		GLR
spt_1017263	serinethreonineprotein kinase BRI1like	BRL2
spt_1017813	protein TRANSPARENT TESTA 9 isoform X3	TT9
spt_1017890	AP2like ethyleneresponsive transcription factor AIL5	AP2
spt_1020269	protein DMR6LIKE OXYGENASE 2	DMR6
spt_1021034	xanthoxin dehydrogenase	ABA2
spt_1024050	YABBY	YABBY
spt_1028604	receptor protein kinase CLAVATA1	ClV1
spt_2002222	YABBY	YABBY
spt_2002807	methanol O-anthraniloyltransferase	MAT
spt_2011911	YABBY	YABBY
spt_2015622		GLR
spt_2018923	TMV resistance protein	TMV

[truncated: 3 more sheets: S11, S12, S13]
